# Supplementary material for: The diacetyliminoxyl radical in oxidative functionalization of alkenes
Source: Royal Society of Chemistry journal article supplement (doi:10.1039/d3ob00925d), 2023-01-01

## ***Supporting Information***

### **Diacetyliminoxyl radical in oxidative functionalization of alkenes**

Alexander S. Budnikov,<sup>1</sup> Igor B. Krylov,<sup>1,\*</sup> Andrey V. Lastovko,<sup>1</sup> Roman A. Dolotov,<sup>1</sup>  
Mikhail I. Shevchenko<sup>1</sup> and Alexander O. Terent'ev<sup>1\*</sup>

E-mail: krylovigor@yandex.ru, terentev@ioc.ac.ru

<sup>1</sup> N. D. Zelinsky Institute of Organic Chemistry of the Russian Academy of Sciences  
47 Leninsky prosp., Moscow 119991, Russian Federation

## Table of contents

|                                                                                                                           |      |
|---------------------------------------------------------------------------------------------------------------------------|------|
| General.....                                                                                                              | S3   |
| Reactions of diacetyliminoxyl radical 2 with vinylarenes 1a–l (experimental details for Tables 1–2).....                  | S4   |
| Reactions of diacetyliminoxyl radical with aliphatic alkenes 4a–g (experimental details for Table 3).....                 | S12  |
| Investigation of the reaction possible side products with $\alpha$ -methylstyrene 1a, styrene 1b and cyclopentene 4a..... | S16  |
| X-ray single-crystal diffraction: Structure determination of compounds <i>anti</i> -3g, 3j' and 3l<br>.....               | S57  |
| Computational details .....                                                                                               | S64  |
| References .....                                                                                                          | S99  |
| The $^1\text{H}$ and $^{13}\text{C}$ spectra of synthesized compounds .....                                               | S101 |

## General

In all experiments RT stands for 22–25 °C.  $^1\text{H}$  and  $^{13}\text{C}$  NMR spectra were recorded on a Bruker AVANCE II 300 and Bruker Fourier 300HD (300.13 for  $^1\text{H}$  and 75.47 MHz for  $^{13}\text{C}$ , respectively) spectrometers in  $\text{CDCl}_3$ . Chemical shifts were reported in parts per million (ppm), and the residual solvent peak was used as an internal reference:  $^1\text{H}$  ( $\text{CDCl}_3$   $\delta$  = 7.26 ppm),  $^{13}\text{C}$  ( $\text{CDCl}_3$   $\delta$  = 77.16 ppm). Multiplicity was indicated as follows: s (singlet), d (doublet), t (triplet), q (quartet), m (multiplet). Coupling constants were reported in Hertz (Hz). FT-IR spectra were recorded on Bruker Alpha instrument. High resolution mass spectra (HR-MS) were measured on a Bruker maXis instrument using electrospray ionization (ESI). The measurements were performed in a positive ion mode (interface capillary voltage – 4500 V); mass range from  $m/z$  50 to  $m/z$  3000 Da; external calibration with Electrospray Calibrant Solution (Fluka). A syringe injection was used for all acetonitrile solutions (flow rate 3  $\mu\text{L}/\text{min}$ ). Nitrogen was applied as a dry gas; interface temperature was set at 180 °C. Gas chromatography-mass spectrometry (GC-MS) was performed on Chromatec crystal 5000 coupled with a quadrupole mass spectrometer (Chromatec MSD) with standard electron ionization (EI) at 70 eV (ion source temperature 200 °C, transfer line temperature, 250 °C) using a capillary low polarity column (5% phenyl / 95% dimethyl polysiloxane, length 30 m, inner diameter 0.25 mm, film thickness 0.25  $\mu\text{m}$ ). The inlet temperature was set at 250 °C, the helium flow rate was set at 1 mL/min. The initial column temperature was set at 70 °C; the heating rate was 25 °C/min to 250 °C.

Styrene 99.5%, 4-chlorostyrene 99%, 4-methoxystyrene 96%,  $\alpha$ -methylstyrene 99%,  $\beta$ -methylstyrene 97%, 1,1-diphenylethylene 98%, *trans*-stilbene 96%, indene 90%, cyclopentene 95%, cyclohexene 99%, *cis*-cyclooctene 95%, 1,1,4,4-tetraphenyl-1,3-butadiene 99%, 2,5-dimethyl-2,4-hexadiene 96%, 2-methyl-1-pentene 99%, 2,4,4-trimethyl-1-pentene 96%, trifluoroacetic acid 99%, 4-dimethylaminopyridine 99%, 1,4-diazabicyclo[2.2.2]octane 97%,  $\text{Cu}(\text{hfac})_2 \cdot x\text{H}_2\text{O}$  97% were used as is from commercial sources.  $\text{CH}_2\text{Cl}_2$  was distilled prior to use. EtOAc were distilled over  $\text{P}_2\text{O}_5$ . [1-(Trifluoromethyl)vinyl]benzene and 2-methyl-1-phenyl-1-propene were synthesized according published procedures.<sup>1,2</sup> Anhydrous copper(II) hexafluoroacetylacetonate ( $\text{Cu}(\text{hfac})_2$ ) was prepared from corresponding hydrate by sublimation in vacuum at 120 °C and subsequent storage over  $\text{P}_2\text{O}_5$ .<sup>3</sup> Preparation of diacetylinoxyl radical is described earlier.<sup>4</sup> To a stirred solution of diacetyl oxime (258 mg, 2 mmol) in 4 mL of  $\text{CH}_2\text{Cl}_2$   $\text{Pb}(\text{OAc})_4$

(469 mg, 1.0 mmol) was added with vigorous stirring. Stirring was continued for 10 min, then the reaction mixture was chromatographed on silica gel using CH<sub>2</sub>Cl<sub>2</sub> as eluent. The fraction corresponding to the dark-red spot was collected, so that the volume of the fraction was 50 mL. The solution of the diacetylinoxyl radical **2** (2 mmol in 50 mL CH<sub>2</sub>Cl<sub>2</sub>) was rotary evaporated to 25 mL. Transfer of diacetylinoxyl from CH<sub>2</sub>Cl<sub>2</sub> to DMSO was achieved by the addition of 25 mL of DMSO to a solution of the diacetylinoxyl in 25 mL of CH<sub>2</sub>Cl<sub>2</sub> followed by water-jet vacuum evaporation of the latter. A MeCN solution of diacetylinoxyl radical was prepared by threefold co-evaporation of the solution of diacetylinoxyl radical in 25 mL of CH<sub>2</sub>Cl<sub>2</sub> with acetonitrile (30 mL) to an approximate volume of 25 mL. For experiments under inert atmosphere, flasks with diacetylinoxyl radical solutions were quickly evacuated (until the start of bubble formation) and then filled with argon three times using a three-way valve.

## Reactions of diacetylinoxyl radical **2** with vinylarenes **1a-l** (experimental details for Tables 1–2)

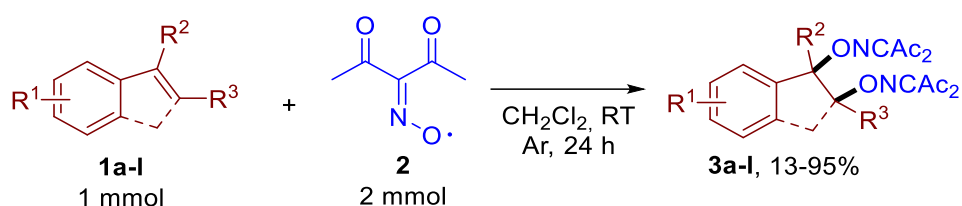

**General procedure for Table 1:**  $\alpha$ -methylstyrene **1a** (1 mmol, 120 mg) in a solvent (2 mL), and an additive (1–2 mmol, 112–478 mg, except for additive-free experiments) were added under an argon atmosphere to the solution of diacetylinoxyl **2** (2 mmol) in a solvent (25 mL). The resulting solution was stirred at 23–25 °C for 24 hours; then the reaction mixture was rotary evaporated under a water-jet vacuum. In run 2 the reaction mixture was diluted with 20 mL of water and then extracted with CH<sub>2</sub>Cl<sub>2</sub> (3x10 mL). The organic extracts were combined, washed with water (10 mL), and dried over Na<sub>2</sub>SO<sub>4</sub> and rotary evaporated under a water-jet vacuum. In run 6 the organic layer was separated and the aqueous layer was extracted with CH<sub>2</sub>Cl<sub>2</sub> (2x10 mL), and all organic extracts were combined, dried over Na<sub>2</sub>SO<sub>4</sub> and rotary evaporated under a water-jet vacuum. The addition product **3a** was isolated by column chromatography on silica gel with CH<sub>2</sub>Cl<sub>2</sub>/EtOAc = 40/1 as eluent.

**General procedure a for dioxyimination of vinylarenes 1a-l (experiments in Table 2 with note a):** the solution of the diacetylinoxyl radical **2** (2 mmol in 25 mL CH<sub>2</sub>Cl<sub>2</sub>) was



placed in a two-necked flask. Then vinylarenes **1a–l** (1 mmol, 104–358 mg) in CH<sub>2</sub>Cl<sub>2</sub> (2 mL) were added. Reaction mixture was stirred for 24 hours at room temperature under an argon atmosphere, then rotary evaporated under a water-jet vacuum. Products **3a–l** were isolated by column chromatography on silica gel.

**General procedure b (experiments in Table 2 with note b):** The solution of the diacetyliminoxyl radical **2** (2 mmol in 25 mL CH<sub>2</sub>Cl<sub>2</sub>) was placed in a two-necked flask. Then β,β-dimethylstyrene **1f** (1 mmol, 132 mg) in CH<sub>2</sub>Cl<sub>2</sub> (2 mL) was added. Reaction mixture was stirred for 3 hours at room temperature under an argon atmosphere, then diluted with solution of Na<sub>2</sub>S<sub>2</sub>O<sub>4</sub> (200 mg in 20 mL of water) and shaken. The organic layer was separated, dried over MgSO<sub>4</sub>, and rotary evaporated under water-jet vacuum.

**General procedure c (experiments in Table 2 with note c):** The solution of the diacetyliminoxyl radical **2** (2 mmol in 25 mL CH<sub>2</sub>Cl<sub>2</sub>) was placed in a two-necked flask wrapped in foil to prevent light exposure. Then β,β-dimethylstyrene **1f** (1 mmol, 132 mg) in CH<sub>2</sub>Cl<sub>2</sub> (2 mL) was added. Reaction mixture was stirred for 3 hours at room temperature under an argon atmosphere, then diluted with solution of Na<sub>2</sub>S<sub>2</sub>O<sub>4</sub> (200 mg in 20 mL of water) and shaken. The organic layer was separated, dried over MgSO<sub>4</sub>, and rotary evaporated under water-jet vacuum.

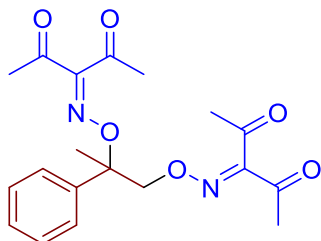

**3,3'-(((2-Phenylpropane-1,2-diyl)bis(oxy))bis(azanylylidene))bis(pentane-2,4-dione)** **3a**, was isolated as yellow oil (33%, 125 mg, 0.333 mmol, purified by column chromatography with CH<sub>2</sub>Cl<sub>2</sub>/EtOAc = 40/1 as eluent). **<sup>1</sup>H NMR** (300.13 MHz, CDCl<sub>3</sub>): δ 7.42–7.23 (m, 5H), 4.62 (s, 2H), 2.35 (s, 3H), 2.28 (s, 3H), 2.26 (s, 3H), 2.14 (s, 3H), 1.78 (s, 3H). **<sup>13</sup>C{<sup>1</sup>H} NMR** (75.47 MHz, CDCl<sub>3</sub>): δ 198.5, 198.0, 194.3, 194.1, 156.6, 156.0, 140.6, 128.6, 128.2, 125.9, 86.5, 81.3, 30.6, 30.3, 25.7, 25.5, 22.3. **FTIR** (KBr): ν<sub>max</sub> = 1727, 1689, 1597, 1420, 1364, 1302, 1196, 1033, 1007, 968, 734, 702. **HRMS** (ESI-TOF) *m/z*: [M+K<sup>+</sup>] calcd. for C<sub>19</sub>H<sub>22</sub>N<sub>2</sub>O<sub>6</sub>+K<sup>+</sup> 413.1109; found 413.1101.

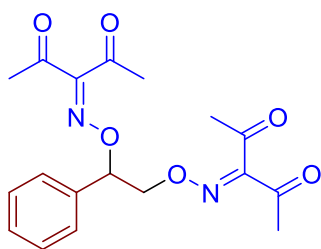

**3,10-Diacetyl-6-phenyl-5,8-dioxa-4,9-diazadodeca-3,9-diene-2,11-dione 3b**, was isolated as yellow solid (14%, 50 mg, 0.138 mmol, purified by column chromatography with CH<sub>2</sub>Cl<sub>2</sub>/EtOAc = 40/1 as eluent). Mp = 76–77 °C. **<sup>1</sup>H NMR** (300.13 MHz, CDCl<sub>3</sub>): δ 7.43–7.35 (m, 3H), 7.32–7.27 (m, 2H), 5.57 (dd, *J* = 8.2, 3.9 Hz, 1H), 4.63 (dd, *J* = 12.4, 8.2 Hz, 1H), 4.53 (dd, *J* = 12.4, 3.9 Hz, 1H), 2.37 (s, 3H), 2.33 (s, 3H), 2.31 (s, 3H), 2.25 (s, 3H). **<sup>13</sup>C{<sup>1</sup>H} NMR** (75.47 MHz, CDCl<sub>3</sub>): δ 198.03, 197.98, 194.20, 194.15, 156.8, 156.5, 136.0, 129.2, 129.0, 126.9, 86.1, 77.8, 30.7, 30.6, 25.8. **FTIR** (KBr):  $\nu_{\text{max}}$  = 1728, 1685, 1595, 1364, 1299, 1039, 1020, 977, 764, 705, 548. **HRMS** (ESI-TOF) *m/z*: [M+NH<sub>4</sub><sup>+</sup>] calcd. for C<sub>18</sub>H<sub>20</sub>N<sub>2</sub>O<sub>6</sub>+NH<sub>4</sub><sup>+</sup> 378.1660; found 378.1654.

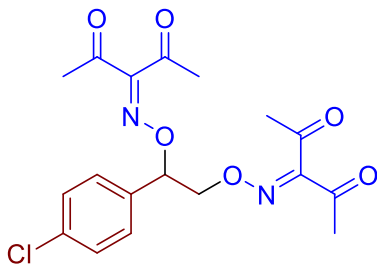

**3,10-Diacetyl-6-(4-chlorophenyl)-5,8-dioxa-4,9-diazadodeca-3,9-diene-2,11-dione 3c**, was isolated as white solid (13%, 51 mg, 0.129 mmol, purified by column chromatography with CH<sub>2</sub>Cl<sub>2</sub>/EtOAc = 40/1 as eluent). Mp = 105–106 °C. **<sup>1</sup>H NMR** (300.13 MHz, CDCl<sub>3</sub>): δ 7.38 (d, *J* = 8.2 Hz, 2H), 7.23 (d, *J* = 8.2 Hz, 2H), 5.59–5.46 (m, 1H), 4.65–4.44 (m, 2H), 2.37 (s, 3H), 2.32 (s, 3H), 2.31 (s, 3H), 2.26 (s, 3H). **<sup>13</sup>C{<sup>1</sup>H} NMR** (75.47 MHz, CDCl<sub>3</sub>): δ 197.72, 197.68, 194.0, 157.1, 156.7, 135.2, 134.6, 129.3, 128.4, 110.2, 85.3, 30.62, 30.58, 25.75, 25.74. **FTIR** (KBr):  $\nu_{\text{max}}$  = 1729, 1685, 1597, 1367, 1298, 1197, 1088, 1041, 1022, 973, 838. **HRMS** (ESI-TOF) *m/z*: [M+Na<sup>+</sup>] calcd. for C<sub>18</sub>H<sub>19</sub>ClN<sub>2</sub>O<sub>6</sub>+Na<sup>+</sup> 417.0824; found 417.0821.

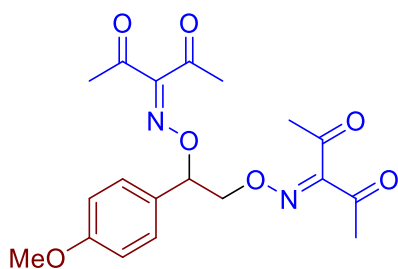

**3,10-Diacetyl-6-(4-methoxyphenyl)-5,8-dioxa-4,9-diazadodeca-3,9-diene-2,11-dione**

**3d**, was isolated as pale-yellow solid (32%, 125 mg, 0.32 mmol, purified by column chromatography with PE/EtOAc = 5/2 as eluent). Mp = 103–104 °C. **<sup>1</sup>H NMR** (300.13 MHz, CDCl<sub>3</sub>): δ 7.22 (d, *J* = 8.5 Hz, 2H), 6.91 (d, *J* = 8.5 Hz, 2H), 5.50 (dd, *J* = 8.2, 3.8 Hz, 1H), 4.62 (dd, *J* = 12.3, 8.2 Hz, 1H), 4.50 (dd, *J* = 12.3, 3.8 Hz, 1H), 3.80 (s, 3H), 2.37 (s, 3H), 2.30 (s, 6H), 2.24 (s, 3H). **<sup>13</sup>C{<sup>1</sup>H} NMR** (75.47 MHz, CDCl<sub>3</sub>): δ 198.0, 197.9, 194.2, 194.1, 160.3, 156.7, 156.5, 128.4, 128.0, 114.4, 85.7, 77.7, 55.4, 30.6, 30.5, 25.71, 25.70. **FTIR** (KBr):  $\nu_{\max}$  = 1729, 1684, 1612, 1599, 1517, 1367, 1300, 1249, 1037, 1018, 969, 624, 559. **HRMS** (ESI-TOF) *m/z*: [M+Na<sup>+</sup>] calcd. for C<sub>19</sub>H<sub>22</sub>N<sub>2</sub>O<sub>7</sub>+Na<sup>+</sup> 413.1319; found 413.1309.

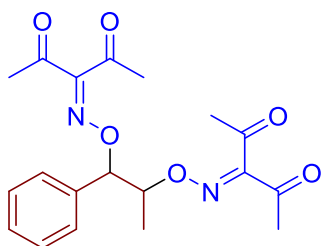

**3,3'-(((1-Phenylpropane-1,2-diyl)bis(oxy))bis(azanylylidene))bis(pentane-2,4-dione)**

**(mixture of diastereomers 1.7:1) 3e**, was isolated as colorless oil (86%, 321 mg, 0.857 mmol, purified by column chromatography with PE/EtOAc = 5/2 as eluent). **<sup>1</sup>H NMR** (300.13 MHz, CDCl<sub>3</sub>): δ 7.42–7.32 (m, 3H), 7.26–7.20 (m, 2H), 5.46 (d, *J* = 4.4 Hz, 0.63H), 5.32 (d, *J* = 7.6 Hz, 0.37H), 4.82–4.70 (m, 1H), 2.36 (s, 1.1H), 2.35 (s, 1.9H), 2.34 (s, 1.9H), 2.30 (s, 1.1H), 2.29 (s, 1.9H), 2.27 (s, 1.1H), 2.26 (s, 1.1H), 2.16 (s, 1.9H), 1.29 (d, *J* = 6.7 Hz, 1.9H), 1.18 (d, *J* = 6.7 Hz, 1.1H). **<sup>13</sup>C{<sup>1</sup>H} NMR** (75.47 MHz, CDCl<sub>3</sub>): δ 198.4, 198.2, 198.1, 198.0, 194.28, 194.26, 194.22, 194.20, 156.8, 156.6, 156.2, 156.1, 136.50, 136.45, 136.3, 129.1, 128.9, 128.7, 127.5, 127.2, 90.0, 88.9, 83.9, 83.7, 30.61, 30.58, 30.5, 25.74, 25.72, 25.69, 16.40, 14.8. **FTIR** (KBr):  $\nu_{\max}$  = 1727, 1689, 1597, 1419, 1364, 1301, 1197, 1086, 1054, 1001, 703. **HRMS** (ESI-TOF) *m/z*: [M+NH<sub>4</sub><sup>+</sup>] calcd. for C<sub>19</sub>H<sub>22</sub>N<sub>2</sub>O<sub>6</sub>+NH<sub>4</sub><sup>+</sup> 392.1816; found 392.1815.

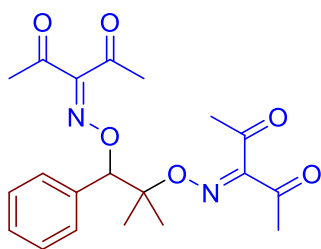

**3,3'-(((2-Methyl-1-phenylpropane-1,2-diyl)bis(oxy))bis(azanylylidene))bis(pentane-2,4-dione) 3f**, was isolated as colorless oil (93%, 362 mg, 0.931 mmol, purified by column chromatography with CH<sub>2</sub>Cl<sub>2</sub>/EtOAc = 20/1 as eluent). **<sup>1</sup>H NMR** (300.13 MHz, CDCl<sub>3</sub>): δ 7.40–7.31 (m, 3H), 7.26–7.19 (m, 2H), 5.44 (s, 1H), 2.40 (s, 3H), 2.36 (s, 3H), 2.25 (s, 3H), 2.22 (s, 3H), 1.40 (s, 3H), 1.33 (s, 3H). **<sup>13</sup>C{<sup>1</sup>H} NMR** (75.47 MHz, CDCl<sub>3</sub>): δ 198.5, 198.0, 194.3, 194.1, 156.7, 156.0, 136.5, 128.7, 128.3, 128.0, 91.8, 85.9, 30.6, 25.8, 25.6, 23.1, 22.0. **FTIR** (KBr):  $\nu_{\max}$  = 1727, 1693, 1366, 1301, 1195, 979, 755, 704. **HRMS** (ESI-TOF)  $m/z$ : [M+NH<sub>4</sub><sup>+</sup>] calcd. for C<sub>20</sub>H<sub>24</sub>N<sub>2</sub>O<sub>6</sub>+NH<sub>4</sub><sup>+</sup> 406.1973; found 406.1967.

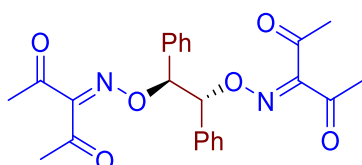

**anti-3,10-Diacetyl-6,7-diphenyl-5,8-dioxa-4,9-diazadodeca-3,9-diene-2,11-dione 3g-anti**, pale-yellow solid (33%, 142 mg, 0.325 mmol, purified by column chromatography with CH<sub>2</sub>Cl<sub>2</sub>/EtOAc = 66/1 as eluent). Mp = 114–116 °C. **<sup>1</sup>H NMR** (300.13 MHz, CDCl<sub>3</sub>): δ 7.37–7.28 (m, 6H), 7.16–7.05 (m, 4H), 5.59 (s, 2H), 2.24 (s, 6H), 2.19 (s, 6H). **<sup>13</sup>C{<sup>1</sup>H} NMR** (75.47 MHz, CDCl<sub>3</sub>): δ 198.0, 194.2, 156.7, 135.7, 128.9, 128.5, 127.8, 89.1, 30.5, 25.7. **FTIR** (KBr):  $\nu_{\max}$  = 1722, 1692, 1301, 996, 739, 695. **HRMS** (ESI-TOF)  $m/z$ : [M+Na<sup>+</sup>] calcd. for C<sub>24</sub>H<sub>24</sub>N<sub>2</sub>O<sub>6</sub>+Na<sup>+</sup> 459.1527; found 459.1525. Single crystal X-Ray analysis is available (see Fig. S1, page S18).

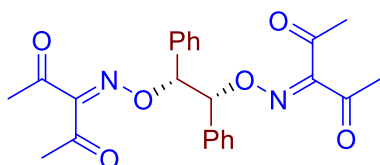

**syn-3,10-Diacetyl-6,7-diphenyl-5,8-dioxa-4,9-diazadodeca-3,9-diene-2,11-dione 3g-syn**, pale-yellow oil (32%, 140 mg, 0.32 mmol, purified by column chromatography with CH<sub>2</sub>Cl<sub>2</sub>/EtOAc = 66/1 as eluent). **<sup>1</sup>H NMR** (300.13 MHz, CDCl<sub>3</sub>): δ 7.31–7.21 (m, 6H), 7.11–

6.98 (m, 4H), 5.64 (s, 2H), 2.34 (s, 6H), 2.31 (s, 6H).  $^{13}\text{C}\{^1\text{H}\}$  NMR (75.47 MHz,  $\text{CDCl}_3$ ):  $\delta$  198.1, 194.2, 156.5, 135.8, 128.8, 128.5, 127.6, 89.7, 30.6, 25.7. FTIR (KBr):  $\nu_{\text{max}}$  = 1726, 1690, 1363, 1291, 1076, 998, 964, 736, 701. HRMS (ESI-TOF)  $m/z$ :  $[\text{M}+\text{Na}^+]$  calcd. for  $\text{C}_{24}\text{H}_{24}\text{N}_2\text{O}_6+\text{Na}^+$  459.1527; found 459.1525.

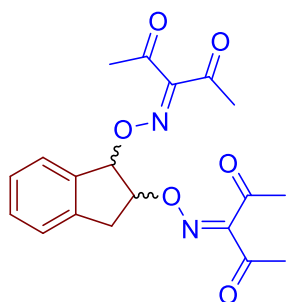

**3,3'-(((2,3-Dihydro-1H-indene-1,2-diyl)bis(oxy)))bis(azanylylidene))bis(pentane-2,4-dione)-1-major 3i-major**, pale yellow oil (26%, 95 mg, 0.255 mmol, purified by column chromatography with  $\text{CHCl}_3/\text{EtOAc} = 40/1$  as eluent).  $^1\text{H}$  NMR (300.13 MHz,  $\text{CDCl}_3$ ):  $\delta$  7.44–7.21 (m, 4H), 5.90 (d,  $J = 3.4$  Hz, 1H), 5.26 (ddd,  $J = 7.4, 4.5, 3.4$  Hz, 1H), 3.51 (dd,  $J = 16.9, 7.4$  Hz, 1H), 3.12 (dd,  $J = 16.9, 4.5$  Hz, 1H), 2.39 (s, 6H), 2.29 (s, 3H), 2.27 (s, 3H).  $^{13}\text{C}\{^1\text{H}\}$  NMR (75.47 MHz,  $\text{CDCl}_3$ ):  $\delta$  197.9, 194.1, 156.8, 140.7, 137.2, 130.3, 127.8, 125.7, 125.3, 92.0, 89.7, 36.2, 30.7, 25.8, 25.7. FTIR (KBr):  $\nu_{\text{max}}$  = 2925, 1727, 1693, 1599, 1420, 1362, 1300, 1195, 1082, 1001, 962, 766, 733. HRMS (ESI-TOF)  $m/z$ :  $[\text{M}+\text{NH}_4^+]$  calcd. for  $\text{C}_{19}\text{H}_{20}\text{N}_2\text{O}_6+\text{NH}_4^+$  390.1660; found 390.1663.

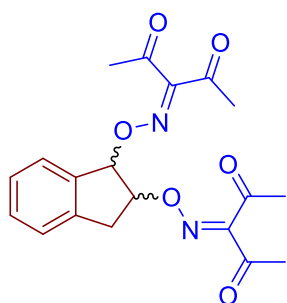

**3,3'-(((2,3-Dihydro-1H-indene-1,2-diyl)bis(oxy)))bis(azanylylidene))bis(pentane-2,4-dione)-2-minor 3i-minor**, pale yellow oil (14%, 53 mg, 0.142 mmol, purified by column chromatography with  $\text{CHCl}_3/\text{EtOAc} = 40/1$  as eluent).  $^1\text{H}$  NMR (300.13 MHz,  $\text{CDCl}_3$ ):  $\delta$  7.45–7.27 (m, 4H), 5.83 (d,  $J = 5.2$  Hz, 1H), 5.34–5.19 (m, 1H), 3.38–3.14 (m, 2H), 2.38 (s, 3H), 2.36 (s, 3H), 2.21 (s, 6H).  $^{13}\text{C}\{^1\text{H}\}$  NMR (75.47 MHz,  $\text{CDCl}_3$ ):  $\delta$  197.9, 194.0, 156.5, 156.4, 140.2, 137.1, 130.5, 127.8, 126.2, 125.3, 87.1, 85.4, 35.6, 30.5, 25.63, 25.60. FTIR (KBr):

$\nu_{\max}$  = 1723, 1689, 1359, 1306, 998, 977, 964, 745. **HRMS** (ESI-TOF)  $m/z$ :  $[M+Na^+]$  calcd. for  $C_{19}H_{20}N_2O_6+Na^+$  395.1214; found 395.1209.

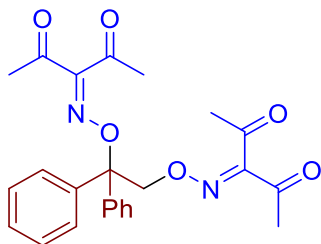

**3,10-Diacetyl-6,6-diphenyl-5,8-dioxa-4,9-diazadodeca-3,9-diene-2,11-dione 3j**, was isolated as yellow oil (56%, 244 mg, 0.559 mmol, purified by PTLC with PE/EtOAc = 5/2 as eluent).  **$^1H$  NMR** (300.13 MHz,  $CDCl_3$ ):  $\delta$  7.44–7.31 (m, 6H), 7.30–7.21 (m, 4H), 5.28 (s, 2H), 2.41 (s, 3H), 2.21 (s, 6H), 2.01 (s, 3H).  **$^{13}C\{^1H\}$  NMR** (75.47 MHz,  $CDCl_3$ ):  $\delta$  198.3, 197.9, 194.1, 194.0, 156.8, 156.1, 140.4, 128.5, 128.4, 127.3, 89.1, 79.7, 30.6, 30.2, 25.7, 25.5. **FTIR** (KBr):  $\nu_{\max}$  = 1724, 1690, 1598, 1448, 1420, 1361, 1300, 1195, 1090, 1030, 963, 919, 738, 107, 622. **HRMS** (ESI-TOF)  $m/z$ :  $[M+Na^+]$  calcd. for  $C_{24}H_{24}N_2O_6+Na^+$  459.1527; found 459.1524.

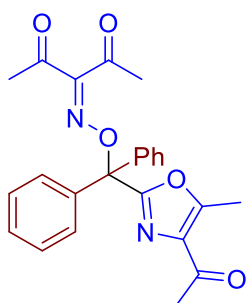

**3-(((4-Acetyl-5-methyloxazol-2-yl)diphenylmethoxy)imino)pentane-2,4-dione 3j'**, was isolated as white solid (17%, 71 mg, 0.169 mmol, purified by PTLC with PE/EtOAc = 5/2 as eluent). Mp = 127–129 °C.  **$^1H$  NMR** (300.13 MHz,  $CDCl_3$ ):  $\delta$  7.48–7.28 (m, 10H), 2.60 (s, 3H), 2.53 (s, 3H), 2.47 (s, 3H), 2.13 (s, 3H).  **$^{13}C\{^1H\}$  NMR** (75.47 MHz,  $CDCl_3$ ):  $\delta$  198.1, 195.1, 194.2, 159.9, 156.7, 155.4, 139.8, 134.9, 128.8, 128.4, 128.0, 89.1, 30.5, 28.0, 25.8, 12.5. **FTIR** (KBr):  $\nu_{\max}$  = 1725, 1690, 1600, 1447, 1421, 1361, 1296, 1190, 1078, 1012, 958, 908, 755, 700, 636. **HRMS** (ESI-TOF)  $m/z$ :  $[M+NH_4^+]$  calcd. for  $C_{24}H_{22}N_2O_5+NH_4^+$  436.1867; found 436.1860. Single crystal X-Ray analysis is available (see Fig. S2, page S20).

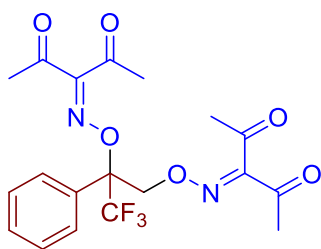

**3,3'-(((3,3,3-Trifluoro-2-phenylpropane-1,2-diyl)bis(oxy))bis(azanylylidene))bis(pentane-2,4-dione 3k**, was isolated as white gum (16%, 68 mg, 0.158 mmol, purified by PTLC with PE/EtOAc = 10/1 as eluent).  $^1\text{H NMR}$  (300.13 MHz,  $\text{CDCl}_3$ ):  $\delta$  7.46–7.36 (m, 5H), 5.21 (d,  $J = 12.8$  Hz, 1H), 4.99 (d,  $J = 12.8$  Hz, 1H), 2.41 (s, 3H), 2.32 (s, 3H), 2.29 (s, 3H), 2.04 (s, 3H).  $^{13}\text{C}\{^1\text{H}\}$  NMR (75.47 MHz,  $\text{CDCl}_3$ ):  $\delta$  197.4, 197.2, 193.7, 193.6, 157.6, 156.6, 131.8, 129.9, 128.9, 126.9, 123.44 (q,  $J = 287.5$  Hz), 86.57 (q,  $J = 27.9$  Hz), 74.9, 30.5, 30.1, 25.9, 25.6. **FTIR** (KBr):  $\nu_{\text{max}} = 1728, 1691, 1365, 1297, 1270, 1187, 1098, 1062, 1038, 952, 702$ . **HRMS** (ESI-TOF)  $m/z$ :  $[\text{M}+\text{Na}^+]$  calcd. for  $\text{C}_{19}\text{H}_{19}\text{F}_3\text{N}_2\text{O}_6+\text{Na}^+$  451.1087; found 451.1072.

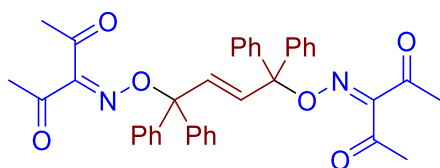

**(E)-3,12-Diacetyl-6,6,9,9-tetraphenyl-5,10-dioxa-4,11-diazatetradeca-3,7,11-triene-2,13-dione 3l**, was isolated as pale-yellow solid (92%, 565 mg, 0.919 mmol, purified by column chromatography with  $\text{CH}_2\text{Cl}_2/\text{EtOAc} = 40/1$  as eluent).  $\text{Mp} = 157\text{--}159$  °C.  $^1\text{H NMR}$  (300.13 MHz,  $\text{CDCl}_3$ ):  $\delta$  7.54–7.10 (m, 20H), 6.27 (s, 2H), 2.39 (s, 6H), 2.09 (s, 6H).  $^{13}\text{C}\{^1\text{H}\}$  NMR (75.47 MHz,  $\text{CDCl}_3$ ):  $\delta$  198.5, 194.3, 156.4, 141.9, 137.1, 128.3, 128.2, 128.0, 91.5, 30.5, 25.6. **FTIR** (KBr):  $\nu_{\text{max}} = 1723, 1689, 1360, 1301, 958, 911, 756, 702$ . **HRMS** (ESI-TOF)  $m/z$ :  $[\text{M}+\text{Na}^+]$  calcd. for  $\text{C}_{38}\text{H}_{34}\text{N}_2\text{O}_6+\text{Na}^+$ : 637.2309; found 637.2303. Single crystal X-Ray analysis is available (see Fig. S3, page S22).

## Reactions of diacetylinoxyl radical with aliphatic alkenes 4a–g (experimental details for Table 3)

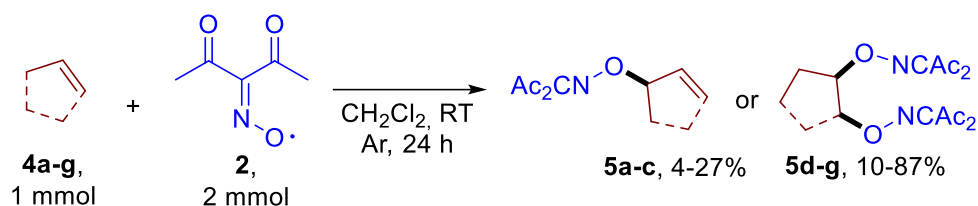

**General procedure for dioxyimination of aliphatic alkenes 4a–g (experiment details for Table 2):** the solution of the diacetylinoxyl radical **2** (2 mmol in 25 mL  $\text{CH}_2\text{Cl}_2$ ) was placed in a two-necked flask. Then alkenes **4a–g** (1 mmol, 68–118 mg) in 2 mL of  $\text{CH}_2\text{Cl}_2$  were added. Reaction mixture was stirred for 24 hours at room temperature under an argon atmosphere, after that reaction mixture was rotary evaporated under a water-jet vacuum. The allylic hydrogen substitution or addition products **5a–g** were isolated by column chromatography on silica gel.

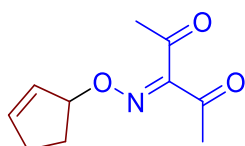

**3-((Cyclopent-2-en-1-yloxy)imino)pentane-2,4-dione 5a**, was isolated as a colorless liquid (18%, 35 mg, 0.179 mmol, purified by column chromatography with EtOAc/PE = 1/5 as eluent).  $^1\text{H NMR}$  (300.13 MHz,  $\text{CDCl}_3$ ):  $\delta$  6.23–6.10 (m, 1H), 5.94–5.81 (m, 1H), 5.50–5.35 (m, 1H), 2.61–2.44 (m, 1H), 2.37 (s, 3H), 2.33–2.28 (m, 2H), 2.28 (s, 3H), 2.01–1.89 (m, 1H).  $^{13}\text{C}\{^1\text{H}\}$  NMR (75.48 MHz,  $\text{CDCl}_3$ ):  $\delta$  198.9, 194.7, 155.9, 139.3, 129.0, 92.1, 31.4, 30.7, 29.3, 25.6; FTIR (KBr):  $\nu_{\text{max}}$  = 1725, 1688, 1592, 1421, 1363, 1302, 1195, 1030, 978, 737  $\text{cm}^{-1}$ . HRMS (ESI-TOF)  $m/z$ :  $[\text{M}+\text{Na}^+]$  calcd. for  $\text{C}_{10}\text{H}_{13}\text{NO}_3+\text{Na}^+$  218.0788; found 218.0792.

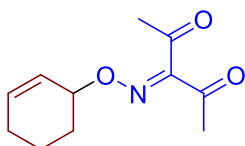

**3-((Cyclohex-2-en-1-yloxy)imino)pentane-2,4-dione 5b**, was isolated as a pale yellow oil (27%, 57 mg, 0.272 mmol, purified by column chromatography with  $\text{CH}_2\text{Cl}_2$  as eluent).  $^1\text{H NMR}$  (300.13 MHz,  $\text{CDCl}_3$ ):  $\delta$  6.14–5.89 (m, 1H), 5.88–5.66 (m, 1H), 4.76 (s, 1H), 2.38 (s, 3H), 2.30 (s, 3H), 2.18–1.97 (m, 2H), 1.97–1.80 (m, 2H), 1.76–1.54 (m, 2H).  $^{13}\text{C}\{^1\text{H}\}$



**NMR** (75.48 MHz, CDCl<sub>3</sub>): δ 198.8, 194.6, 155.9, 133.9, 124.9, 79.7, 30.7, 28.1, 25.7, 25.1, 18.6. **FTIR** (KBr): ν<sub>max</sub> = 1725, 1688, 1363, 1302, 982 cm<sup>-1</sup>. **HRMS** (ESI-TOF) *m/z*: [M+Na<sup>+</sup>] calcd. for C<sub>11</sub>H<sub>15</sub>NO<sub>3</sub>+Na<sup>+</sup> 232.0944; found 232.0943.

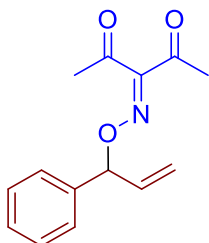

**3-(((1-Phenylallyl)oxy)imino)pentane-2,4-dione 5c**, was isolated as colorless oil (13%, 31 mg, 0.126 mmol, purified by PTLC with PE/EtOAc = 10/1 as eluent). **<sup>1</sup>H NMR** (300.13 MHz, CDCl<sub>3</sub>): δ 7.40–7.28 (m, 5H), 6.10 (ddd, *J* = 17.0, 10.6, 6.3 Hz, 1H), 5.72 (d, *J* = 6.3 Hz, 1H), 5.34 (d, *J* = 10.6 Hz, 1H), 5.30 (d, *J* = 17.0 Hz, 1H), 2.34 (s, 3H), 2.33 (s, 3H). **<sup>13</sup>C{<sup>1</sup>H} NMR** (75.47 MHz, CDCl<sub>3</sub>): δ 198.5, 194.5, 156.3, 138.6, 136.1, 128.8, 128.6, 127.4, 118.7, 88.9, 30.7, 25.8. **FTIR** (KBr): ν<sub>max</sub> = 1726, 1688, 1363, 1300, 1195, 1108, 1072, 988, 701, 468. **HRMS** (ESI-TOF) *m/z*: [M+NH<sub>4</sub><sup>+</sup>] calcd. for C<sub>14</sub>H<sub>15</sub>NO<sub>3</sub>+NH<sub>4</sub><sup>+</sup> 263.1390; found 263.1391.

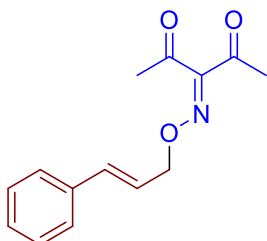

**3-((Cinnamyloxy)imino)pentane-2,4-dione 5c'**, was isolated as colorless oil (4%, 9 mg, 0.037 mmol, purified by PTLC with PE/EtOAc = 10/1 as eluent). **<sup>1</sup>H NMR** (300.13 MHz, CDCl<sub>3</sub>): δ 7.44–7.27 (m, 5H), 6.67 (d, *J* = 15.8 Hz, 1H), 6.33 (dt, *J* = 15.8, 6.5 Hz, 1H), 4.90 (d, *J* = 6.5 Hz, 2H), 2.40 (s, 3H), 2.34 (s, 3H). **<sup>13</sup>C{<sup>1</sup>H} NMR** (75.47 MHz, CDCl<sub>3</sub>): δ 198.6, 194.5, 156.2, 136.1, 135.3, 128.8, 128.5, 126.9, 123.2, 77.6, 30.8, 25.8. **FTIR** (KBr): ν<sub>max</sub> = 2923, 1726, 1685, 1364, 1299, 1195, 1094, 993, 967. **HRMS** (ESI-TOF) *m/z*: [M+Na<sup>+</sup>] calcd. for C<sub>14</sub>H<sub>15</sub>NO<sub>3</sub>+Na<sup>+</sup> 268.0944; found 268.0951.

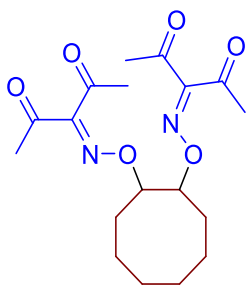

**3,3'-((Cyclooctane-1,2-diylbis(oxy))bis(azanylylidene))bis(pentane-2,4-dione) 5d**, was isolated as yellow oil (18%, 65 mg, 0.177 mmol, purified by column chromatography with PE/EtOAc = 4/1 as eluent). **<sup>1</sup>H NMR** (300.13 MHz, CDCl<sub>3</sub>): δ 4.75–4.64 (m, 1H), 4.59–4.53 (m, 1H), 2.34 (s, 6H), 2.24 (s, 6H), 2.10–1.78 (m, 4H), 1.74–1.49 (m, 6H), 1.49–1.28 (m, 2H). **<sup>13</sup>C{<sup>1</sup>H} NMR** (75.47 MHz, CDCl<sub>3</sub>): δ = 198.4, 198.3, 194.3, 156.04, 156.01, 88.3, 86.5, 30.5, 30.4, 28.8, 28.3, 26.2, 25.61, 25.58, 25.53, 24.5, 22.6. **FTIR** (KBr): ν<sub>max</sub> = 2929, 1728, 1684, 1419, 1363, 1302, 985. **HRMS** (ESI-TOF) *m/z*: [M+NH<sub>4</sub><sup>+</sup>] calcd. for C<sub>18</sub>H<sub>26</sub>N<sub>2</sub>O<sub>6</sub>+NH<sub>4</sub><sup>+</sup> 384.2129; found 384.2127.

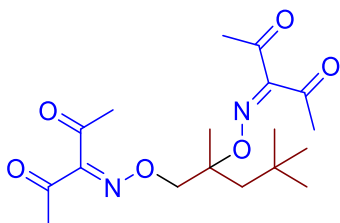

**3,3'-(((2,4,4-Trimethylpentane-1,2-diyl)bis(oxy))bis(azanylylidene))bis(pentane-2,4-dione) 5e**, was isolated as white gum (14%, 51 mg, 0.138 mmol, purified by PTLC with PE/EtOAc = 4/1 as eluent). **<sup>1</sup>H NMR** (300.13 MHz, CDCl<sub>3</sub>): δ 4.42 (d, *J* = 11.7 Hz, 1H), 4.36 (d, *J* = 11.7 Hz, 1H), 2.39 (s, 3H), 2.34 (s, 3H), 2.30 (s, 3H), 2.26 (s, 3H), 1.81 (d, *J* = 15.2 Hz, 1H), 1.60 (d, *J* = 15.2 Hz, 1H), 1.45 (s, 3H), 0.99 (s, 9H). **<sup>13</sup>C{<sup>1</sup>H} NMR** (75.47 MHz, CDCl<sub>3</sub>): δ 198.7, 198.1, 194.4, 194.2, 156.2, 155.7, 86.8, 81.3, 47.7, 31.6, 31.1, 30.60, 30.55, 25.7, 25.6, 21.9. **FTIR** (KBr): ν<sub>max</sub> = 2955, 1727, 1688, 1365, 1302, 1196, 1082, 1033, 977. **HRMS** (ESI-TOF) *m/z*: [M+H<sup>+</sup>] calcd. for C<sub>18</sub>H<sub>28</sub>N<sub>2</sub>O<sub>6</sub>+H<sup>+</sup> 369.2020; found 369.2017.

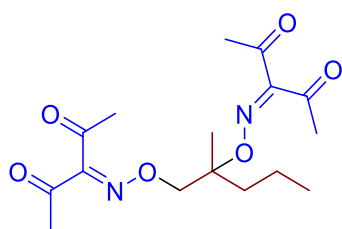

**3,3'-(((2-Methylpentane-1,2-diyl)bis(oxy))bis(azanylylidene))bis(pentane-2,4-dione) 5f**, was isolated as colorless oil (10%, 33 mg, 0.096 mmol, purified by PTLC with PE/EtOAc = 4/1 as eluent). **<sup>1</sup>H NMR** (300.13 MHz, CDCl<sub>3</sub>): δ 4.45–4.32 (m, 2H), 2.39 (s, 3H), 2.35 (s, 3H), 2.29 (s, 3H), 2.27 (s, 3H), 1.68–1.59 (m, 2H), 1.42–1.29 (m, 5H), 0.93 (t, *J* = 7.3 Hz, 2H). **<sup>13</sup>C{<sup>1</sup>H} NMR** (75.47 MHz, CDCl<sub>3</sub>): δ 198.5, 198.1, 194.3, 194.2, 156.2, 156.0, 85.6, 80.0, 38.0, 30.59, 30.57, 25.7, 25.60, 20.4, 16.6, 14.6. **FTIR** (KBr):  $\nu_{\max}$  = 2693, 1727, 1693, 1365, 1301, 1195, 1083, 1029, 967. **HRMS** (ESI-TOF) *m/z*: [M+K<sup>+</sup>] calcd. for C<sub>16</sub>H<sub>24</sub>N<sub>2</sub>O<sub>6</sub>+K<sup>+</sup> 379.1266; found 379.1275.

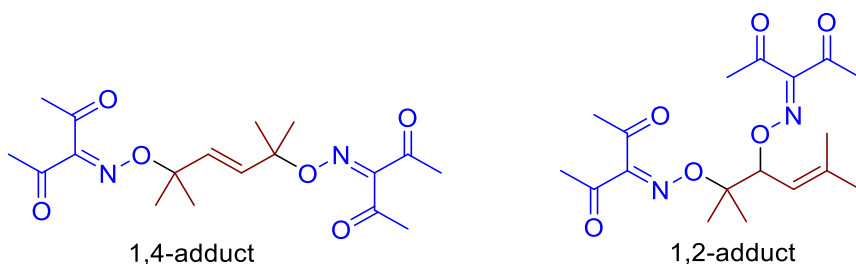

**(E)-3,3'-(((2,5-Dimethylhex-3-ene-2,5-diyl)bis(oxy))bis(azanylylidene))bis(pentane-2,4-dione)-1-major** and **3,3'-(((2,5-dimethylhex-4-ene-2,3-diyl)bis(oxy))bis(azanylylidene))bis(pentane-2,4-dione)-2-minor** (mixture of regioisomers 1.75:1) **5g**, was isolated as yellow oil (87%, 319 mg, 0.87 mmol, purified by column chromatography with CH<sub>2</sub>Cl<sub>2</sub>/EtOAc = 40/1 as eluent). **<sup>1</sup>H NMR** (300.13 MHz, CDCl<sub>3</sub>): *major 1,4-isomer*: δ 5.77 (s, 2H), 2.34 (s, 6H), 2.28 (s, 6H), 1.44 (s, 12H); *minor 1,2-isomer*: δ 5.21 (d, *J* = 10.0 Hz, 1H), 5.14 (d, *J* = 10.0 Hz, 1H), 2.39 (s, 3H), 2.32 (s, 3H), 2.26 (s, 3H), 2.24 (s, 3H), 1.79 (s, 3H), 1.78 (s, 3H), 1.36 (s, 3H), 1.33 (s, 3H). **<sup>13</sup>C{<sup>1</sup>H} NMR** (75.47 MHz, CDCl<sub>3</sub>): δ 198.7, 198.5, 198.3, 194.44, 194.29, 194.22, 155.82, 155.78, 141.1, 134.0, 119.1, 87.0, 86.0, 83.8, 30.62, 30.50, 30.49, 26.3, 26.0, 25.67, 25.57, 25.47, 22.8, 21.7, 18.9. **FTIR** (KBr):  $\nu_{\max}$  = 2986, 2937, 1726, 1688, 1297, 1192, 1070, 929, 550. **HRMS** (ESI-TOF) *m/z*: [M+NH<sub>4</sub><sup>+</sup>] calcd. for C<sub>18</sub>H<sub>26</sub>N<sub>2</sub>O<sub>6</sub>+NH<sub>4</sub><sup>+</sup> 384.2129; found 384.2130.

## Investigation of the reaction possible side products with $\alpha$ -methylstyrene **1a**, styrene **1b** and cyclopentene **4a**

*Reaction with  $\alpha$ -methylstyrene **1a**:* the solution of the diacetyliminoxyl radical **2** (2 mmol in 25 mL  $\text{CH}_2\text{Cl}_2$ ) was placed in a two-necked flask. Then  $\alpha$ -methylstyrene **1a** (1 mmol, 120 mg) in  $\text{CH}_2\text{Cl}_2$  (2 mL) was added and the reaction mixture was stirred for 24 hours at room temperature under an argon atmosphere. 1,1,2,2-Tetrachloroethane was added as an internal standard, and then the crude reaction mixture was analyzed using  $^1\text{H}$  NMR spectroscopy. The reaction mixture was rotary evaporated under a water-jet vacuum and analyzed employing HRMS and GC-MS.

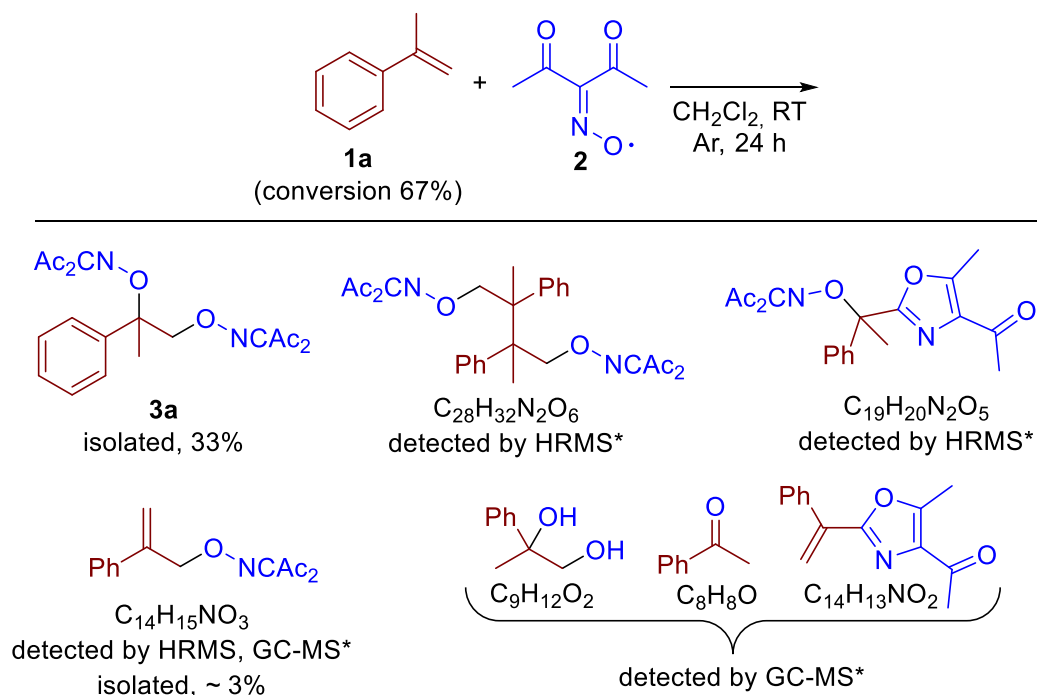

**\*Possible structures proposed based on HRMS and GC-MS data**

**<sup>1</sup>H NMR (300.13, CH<sub>2</sub>Cl<sub>2</sub>)**

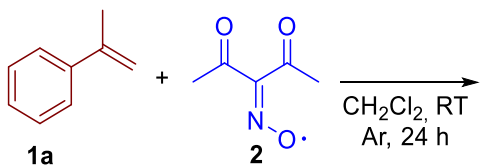

CH<sub>2</sub>Cl<sub>2</sub>

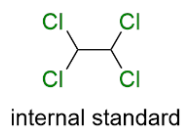

internal standard

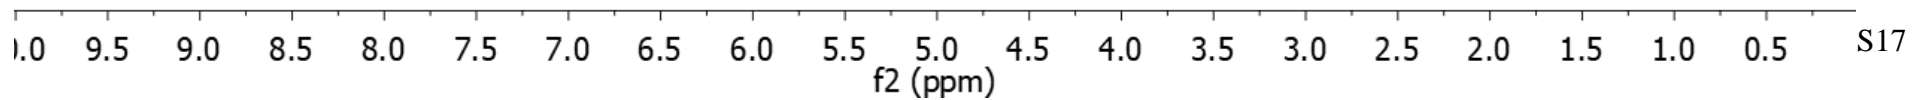

7.46  
7.44  
7.44  
7.39  
7.37  
7.36  
7.34  
7.34  
7.33  
7.31  
7.30  
7.29  
7.29  
7.28  
7.26  
7.26  
5.35  
5.35  
5.28  
5.07  
4.70  
4.62  
2.60  
2.56  
2.55  
2.45  
2.43  
2.41  
2.40  
2.36  
2.35  
2.34  
2.33  
2.32  
2.31  
2.30  
2.29  
2.28  
2.28  
2.26  
2.25  
2.25  
2.24  
2.01  
1.97  
1.91  
1.78  
1.30

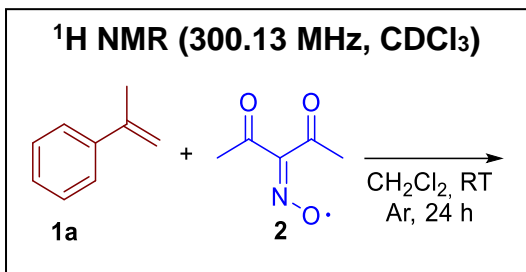

|                           |                   |
|---------------------------|-------------------|
| 1 Title                   | BUD987.{1H}.2.fid |
| 2 Solvent                 | CDCl <sub>3</sub> |
| 3 Temperature             | 298.0             |
| 4 Pulse Sequence          | zgpr30            |
| 5 Number of Scans         | 16                |
| 6 Receiver Gain           | 101.0             |
| 7 Relaxation Delay        | 2.0000            |
| 8 Pulse Width             | 14.7000           |
| 9 Acquisition Time        | 2.4869            |
| 10 Spectrometer Frequency | 300.23            |
| 11 Spectral Width         | 5882.4            |
| 12 Lowest Frequency       | -2297.6           |
| 13 Nucleus                | <sup>1</sup> H    |
| 14 Acquired Size          | 14629             |
| 15 Spectral Size          | 65536             |

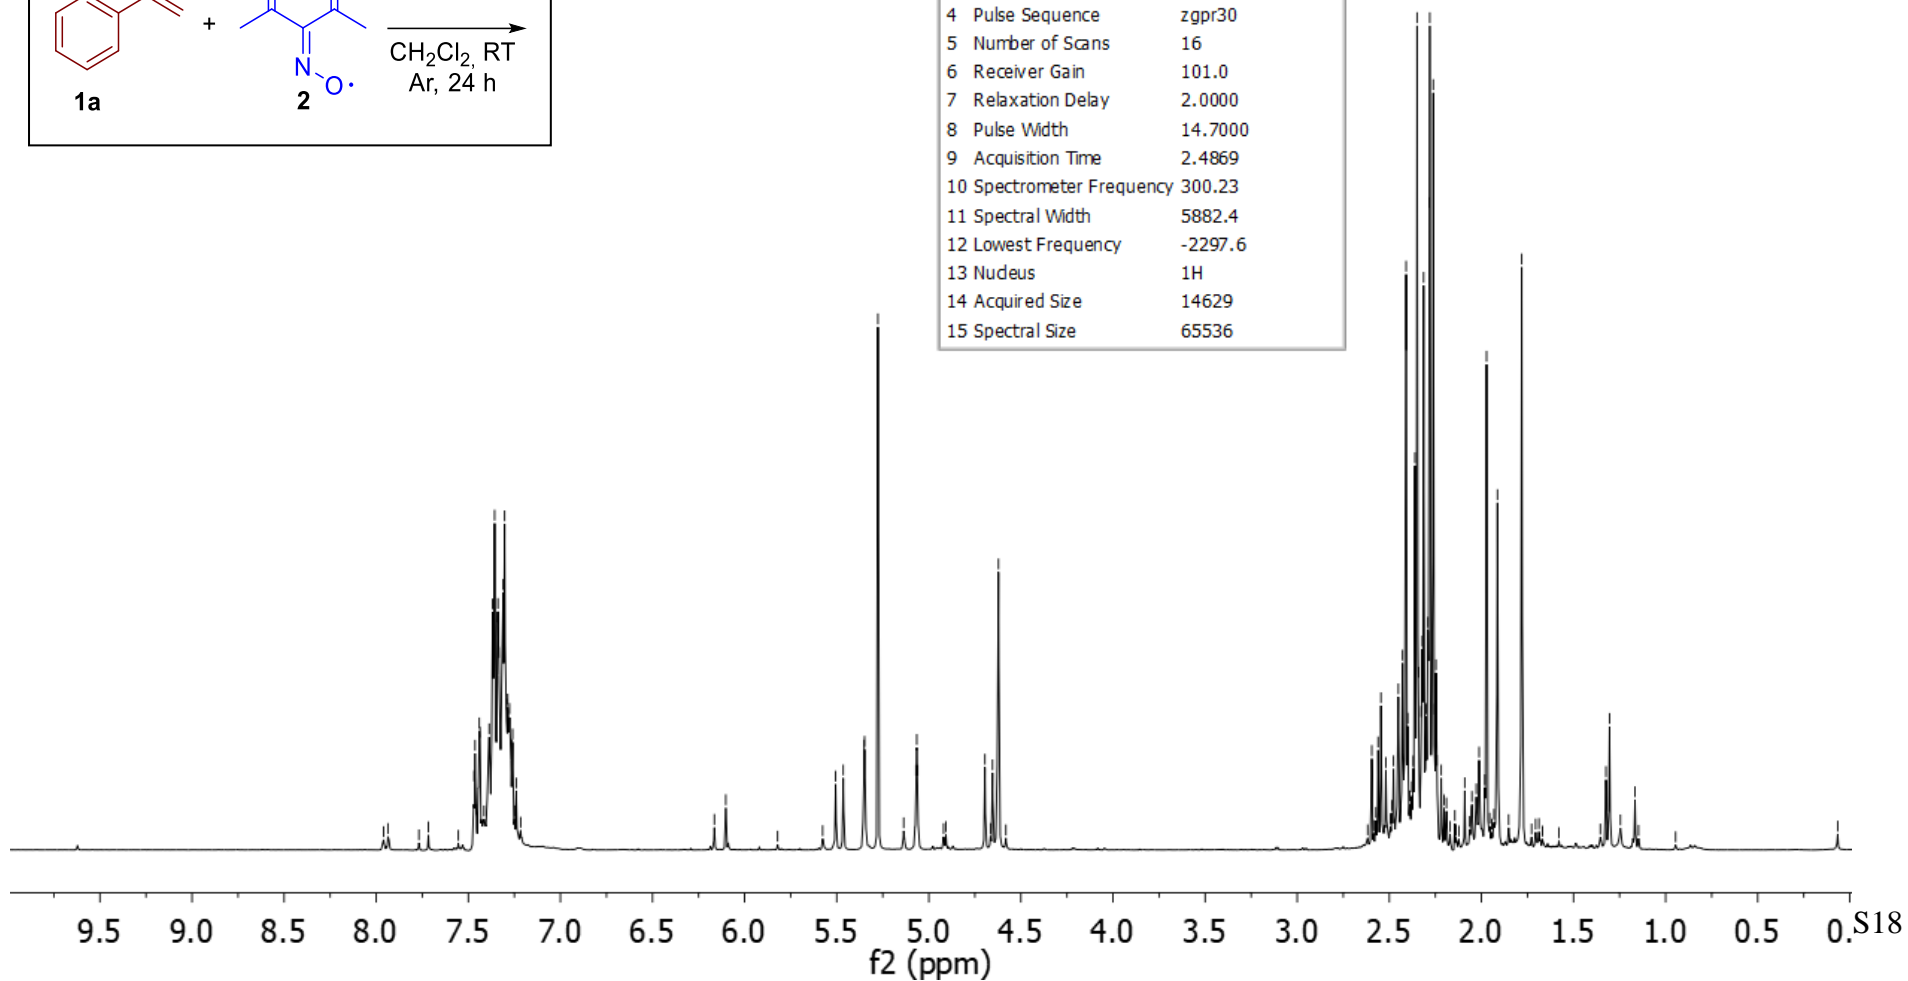

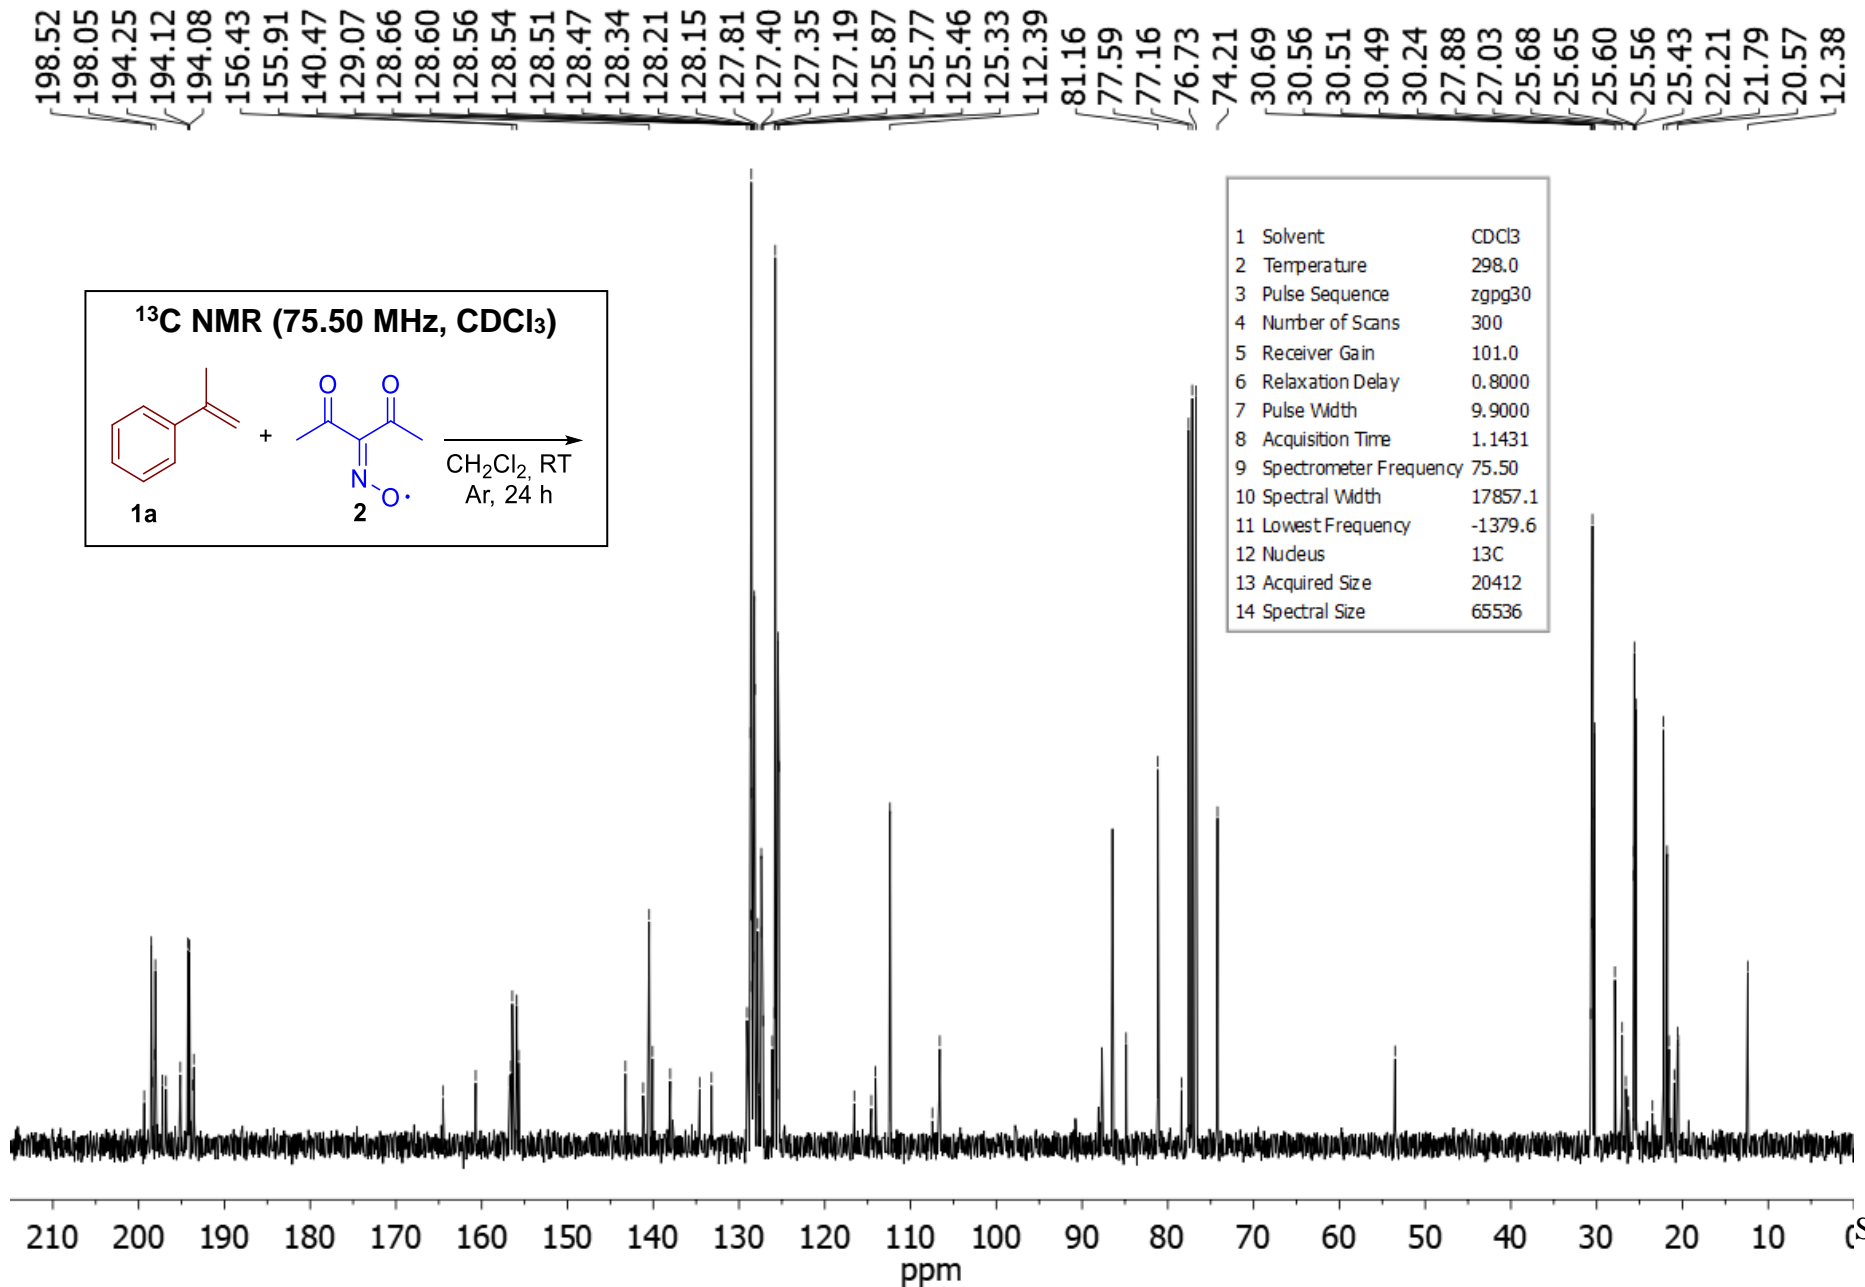

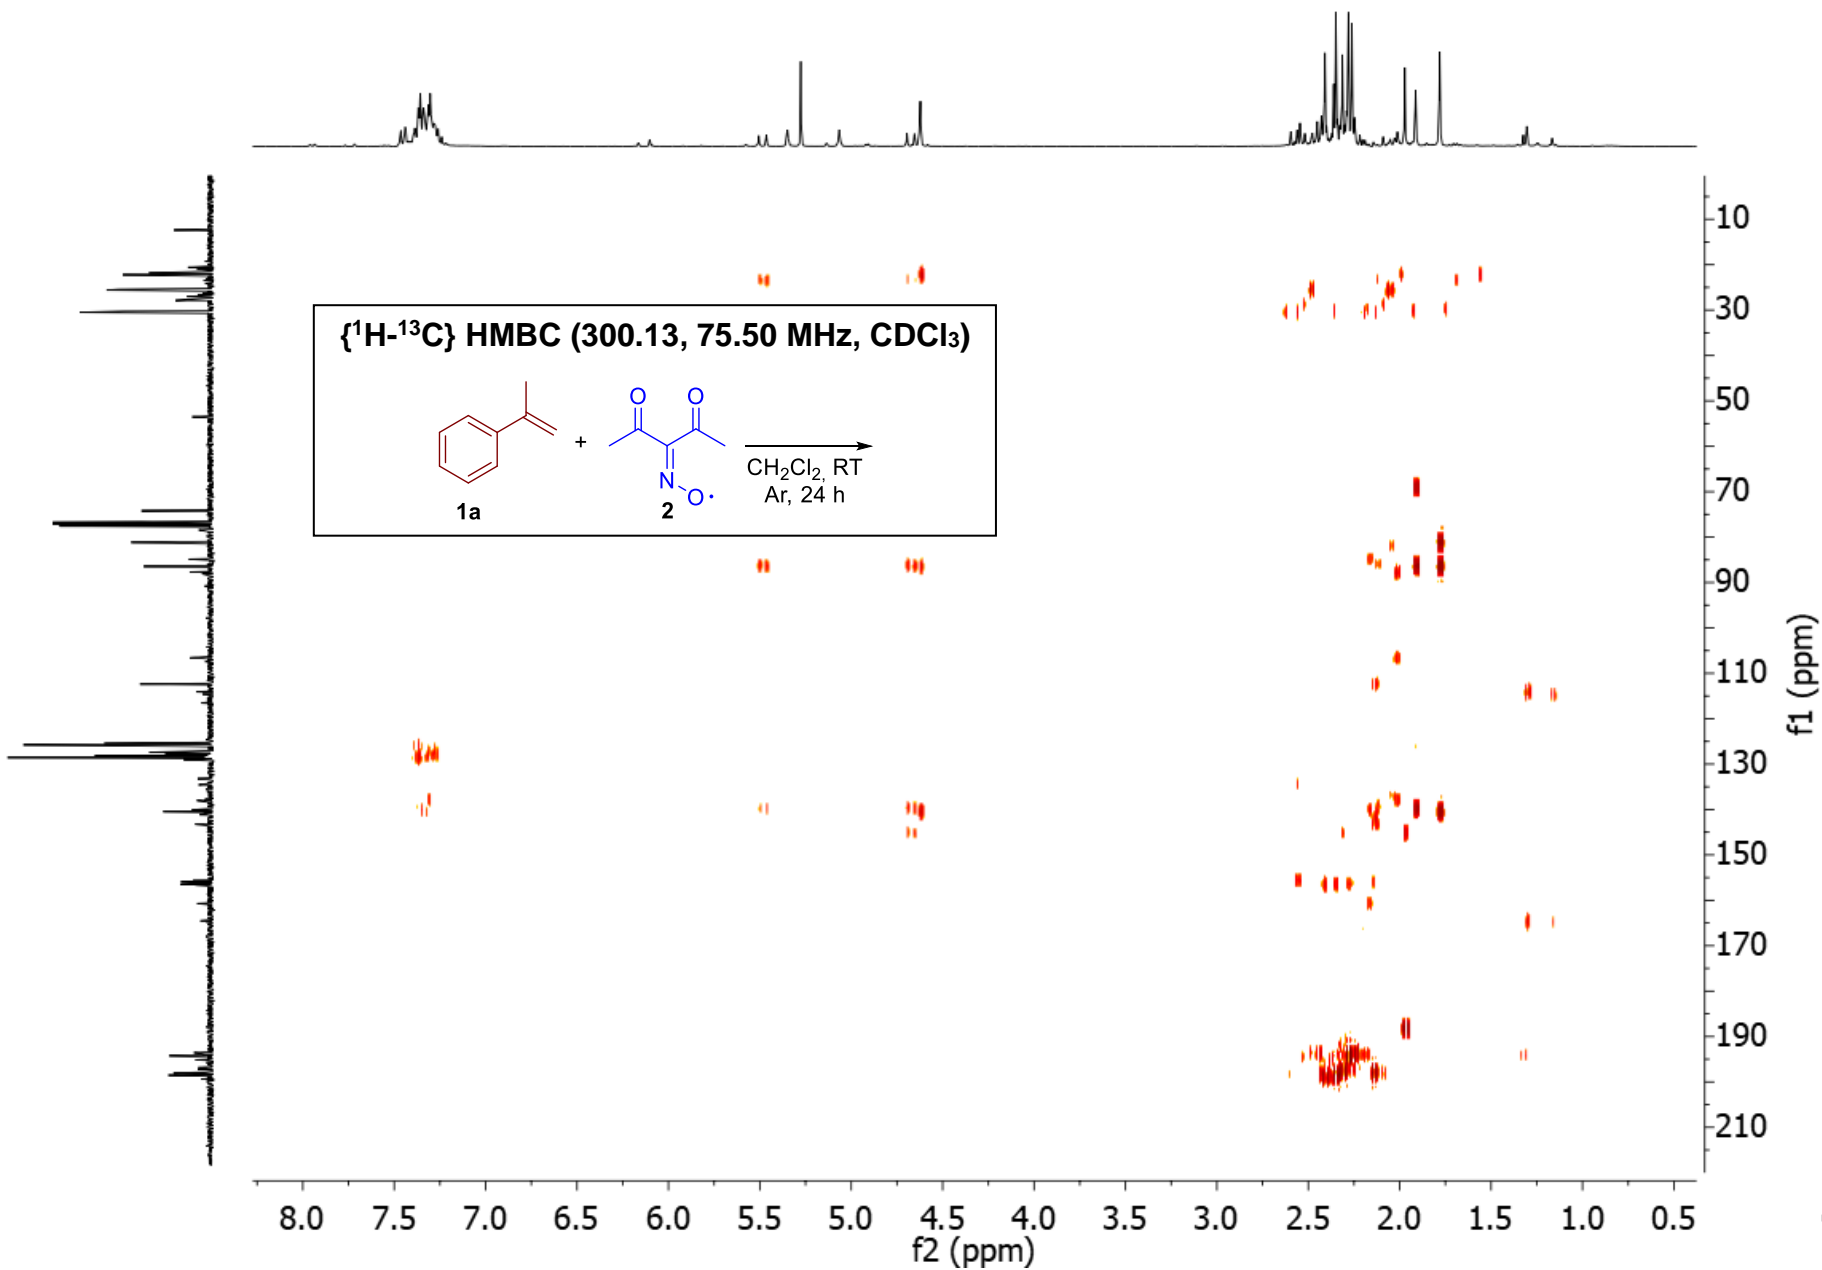



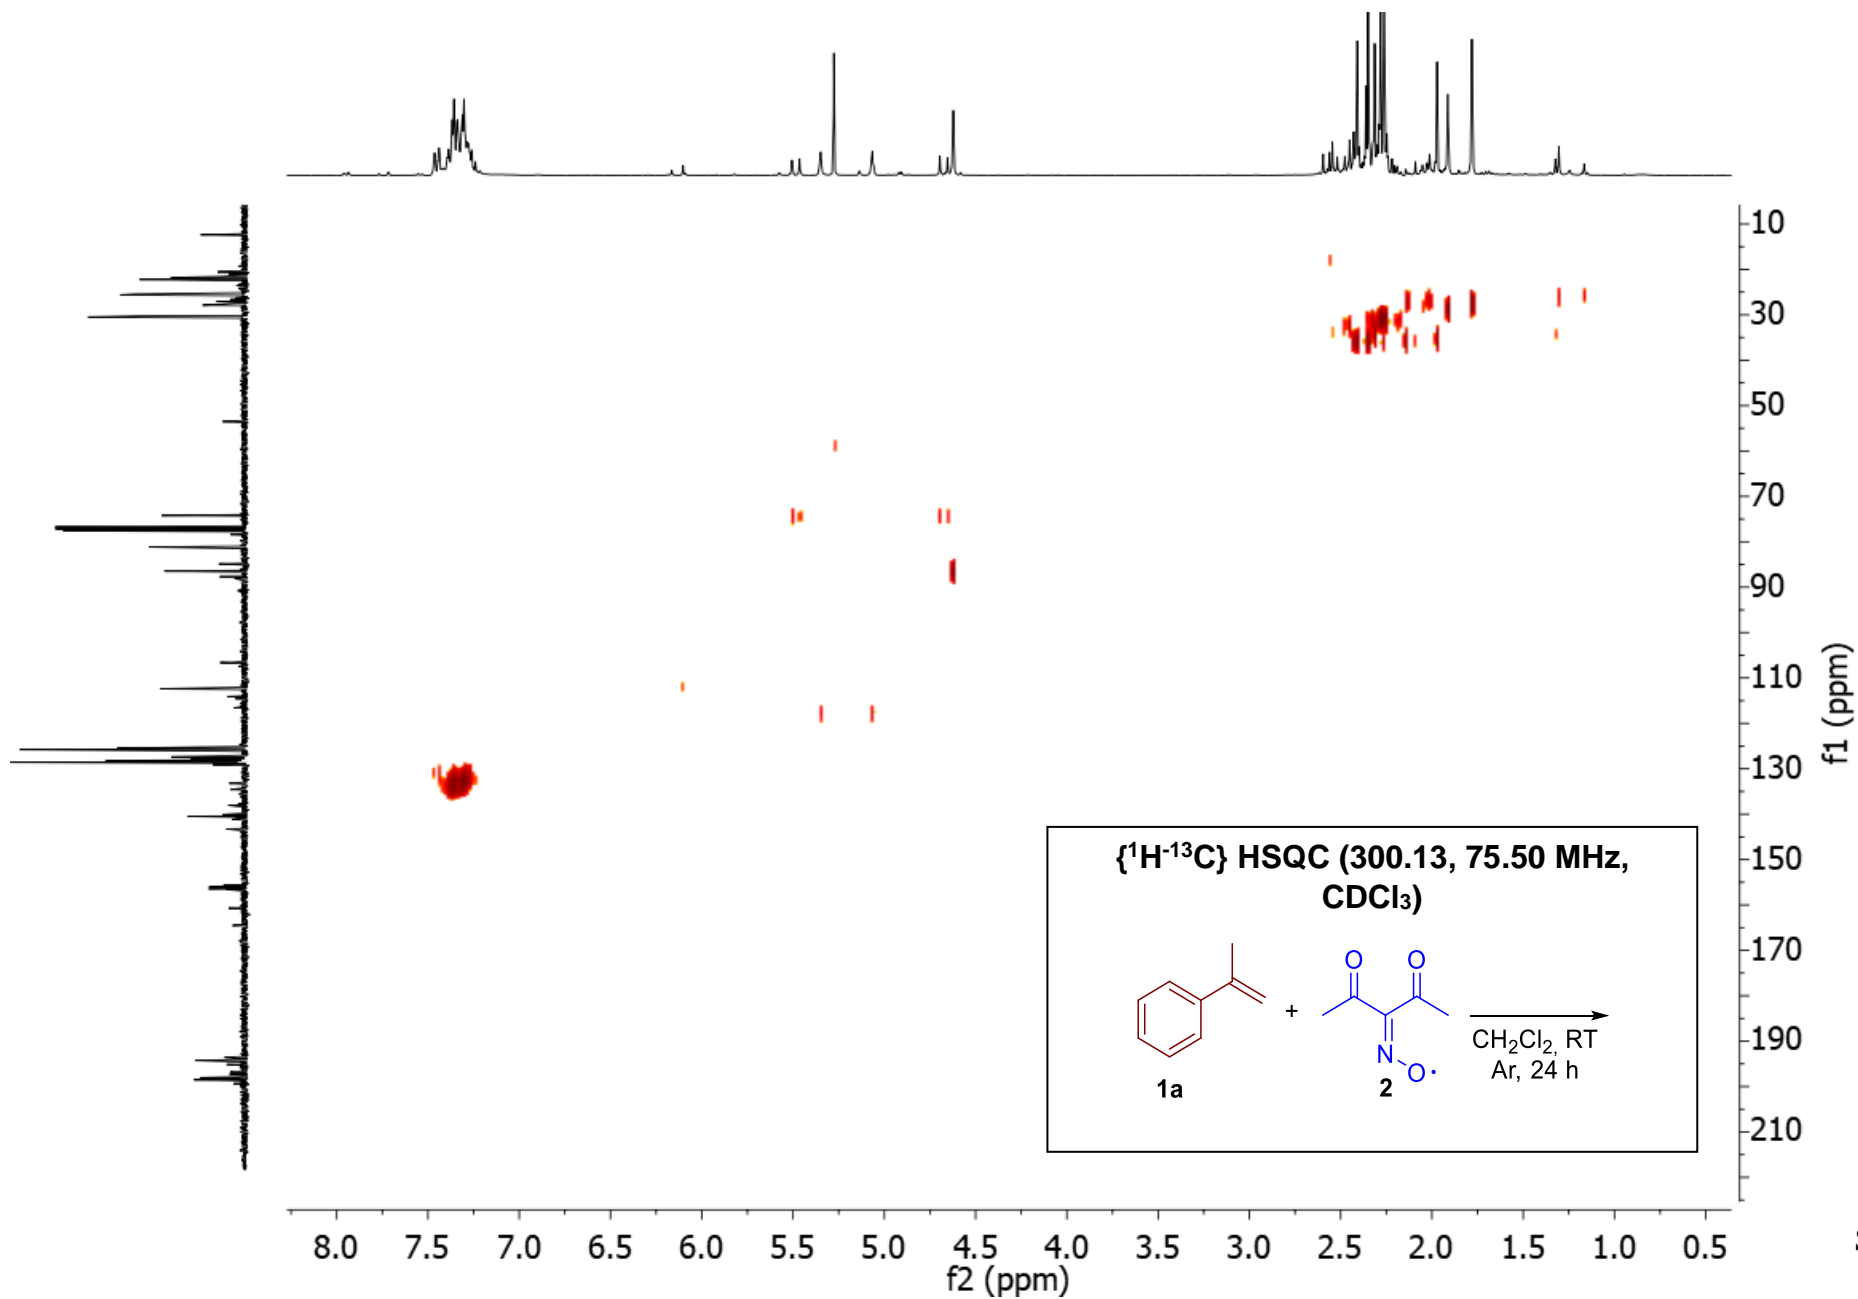

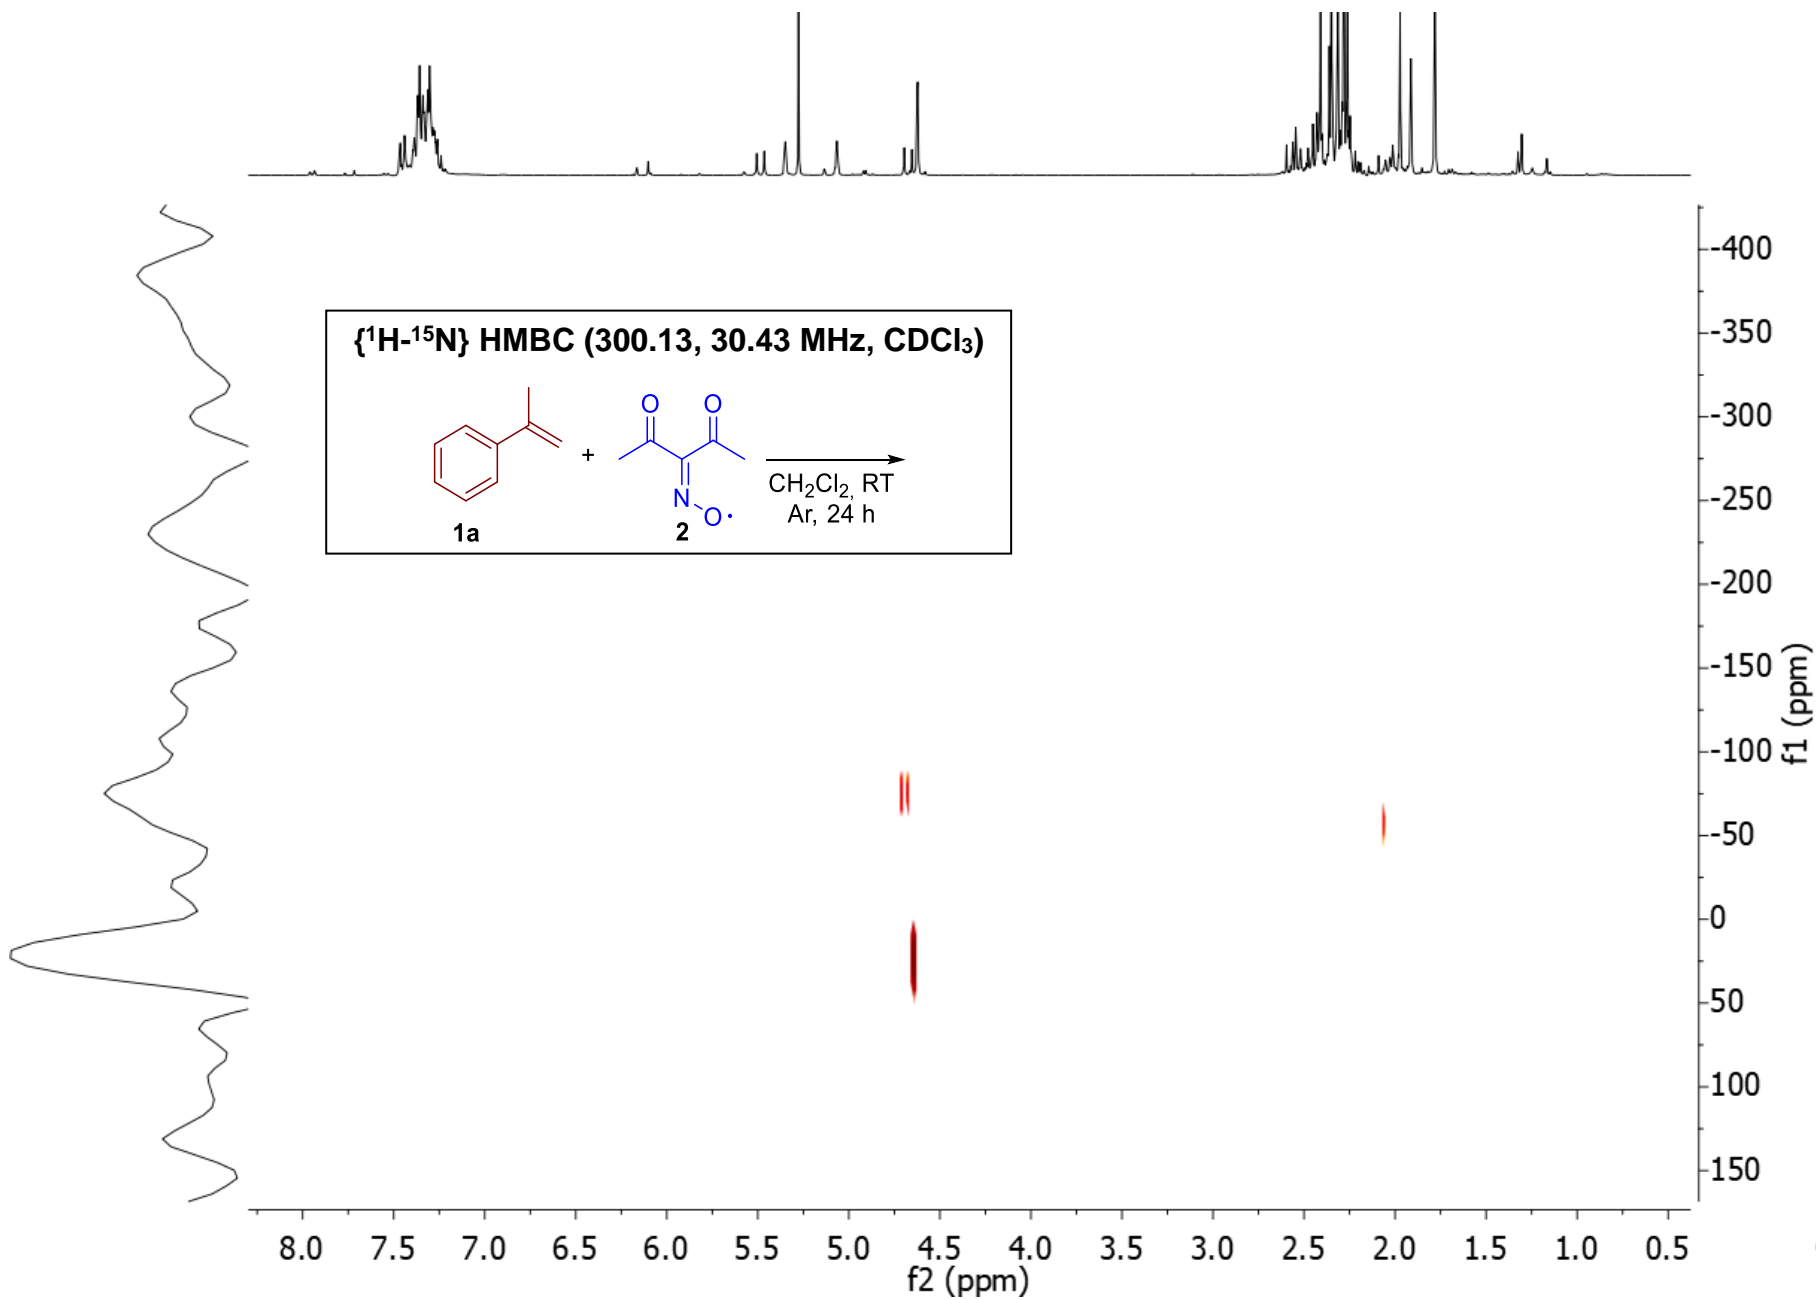

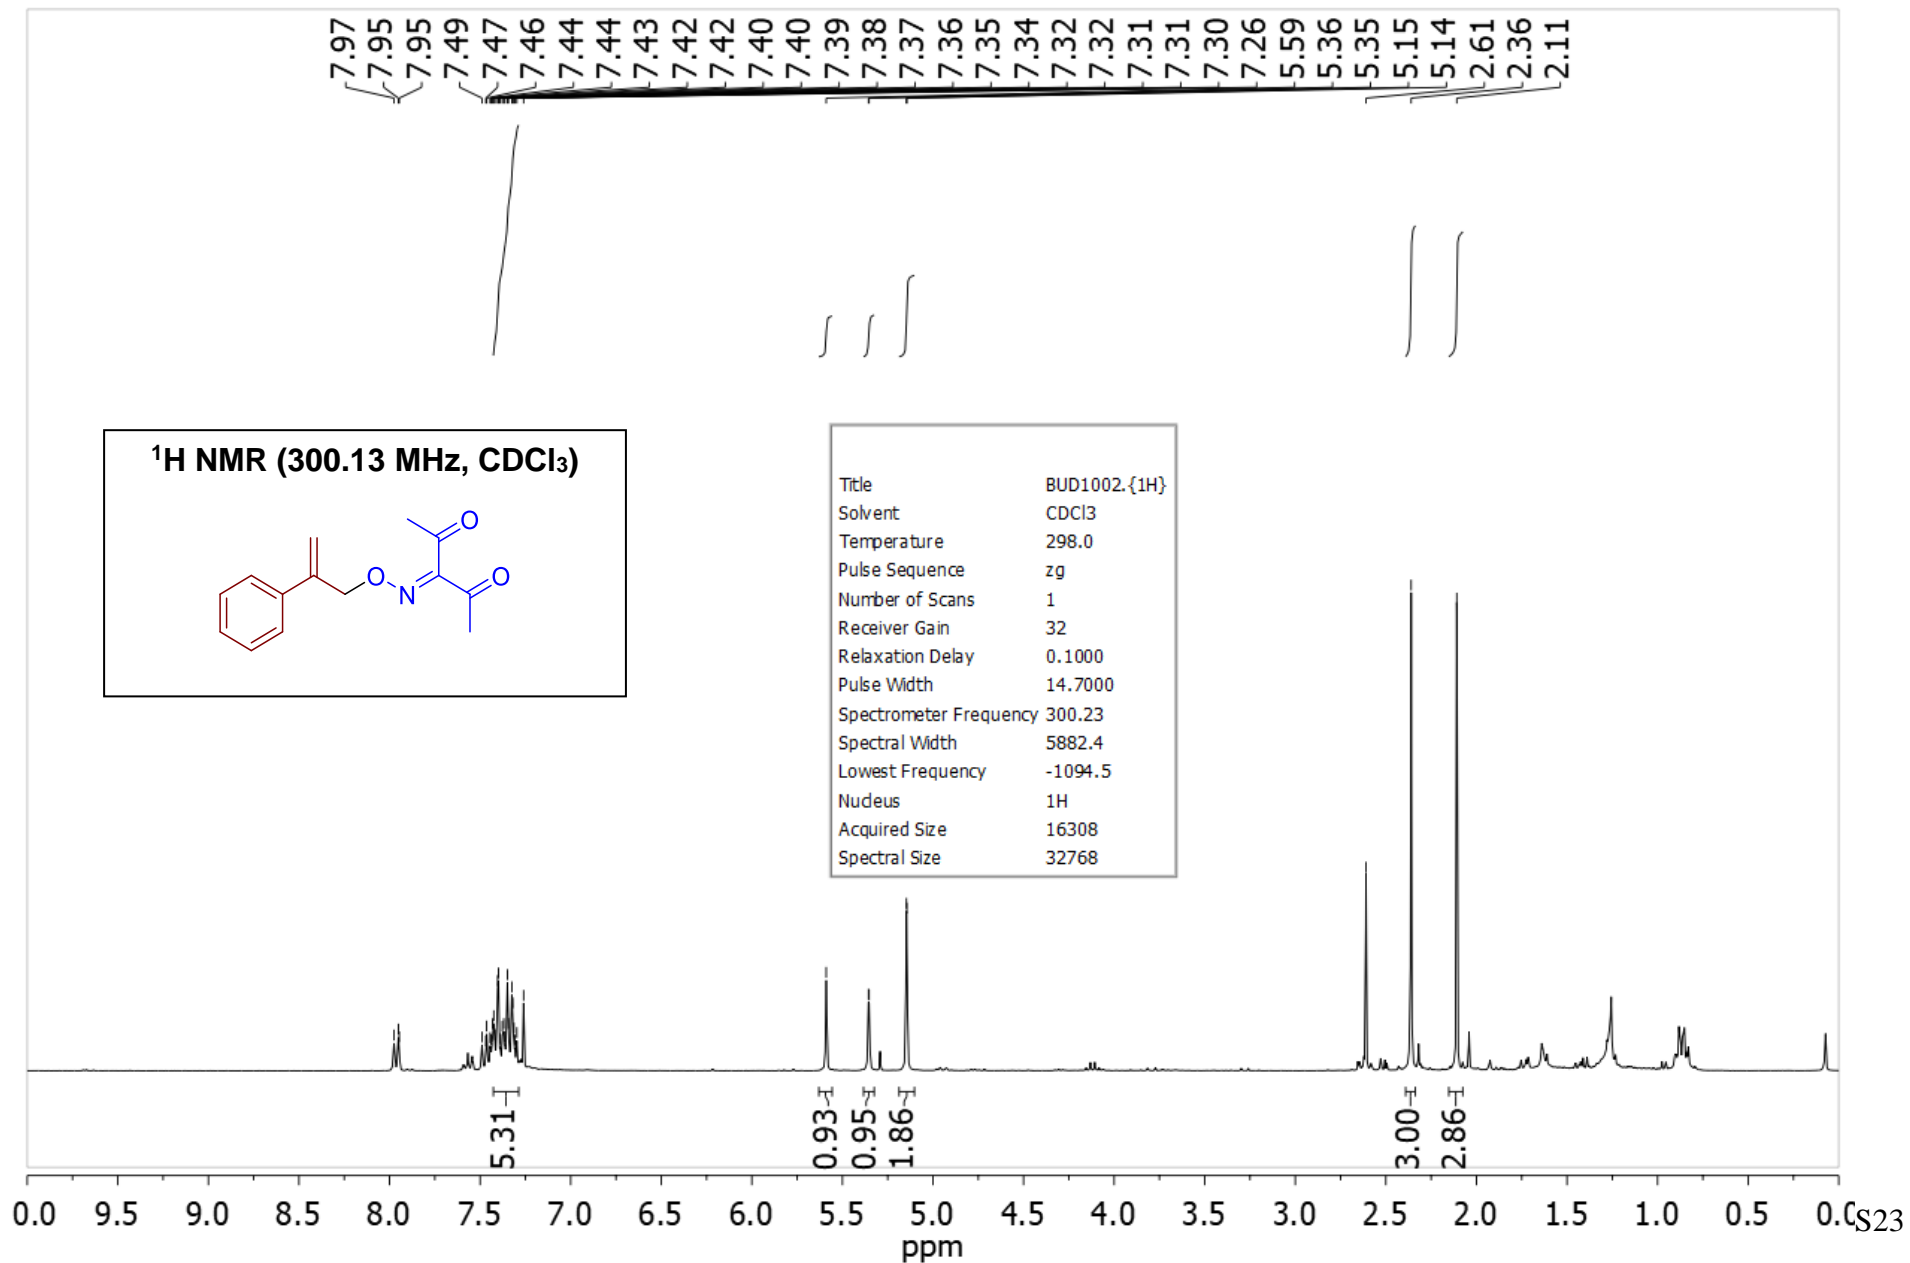

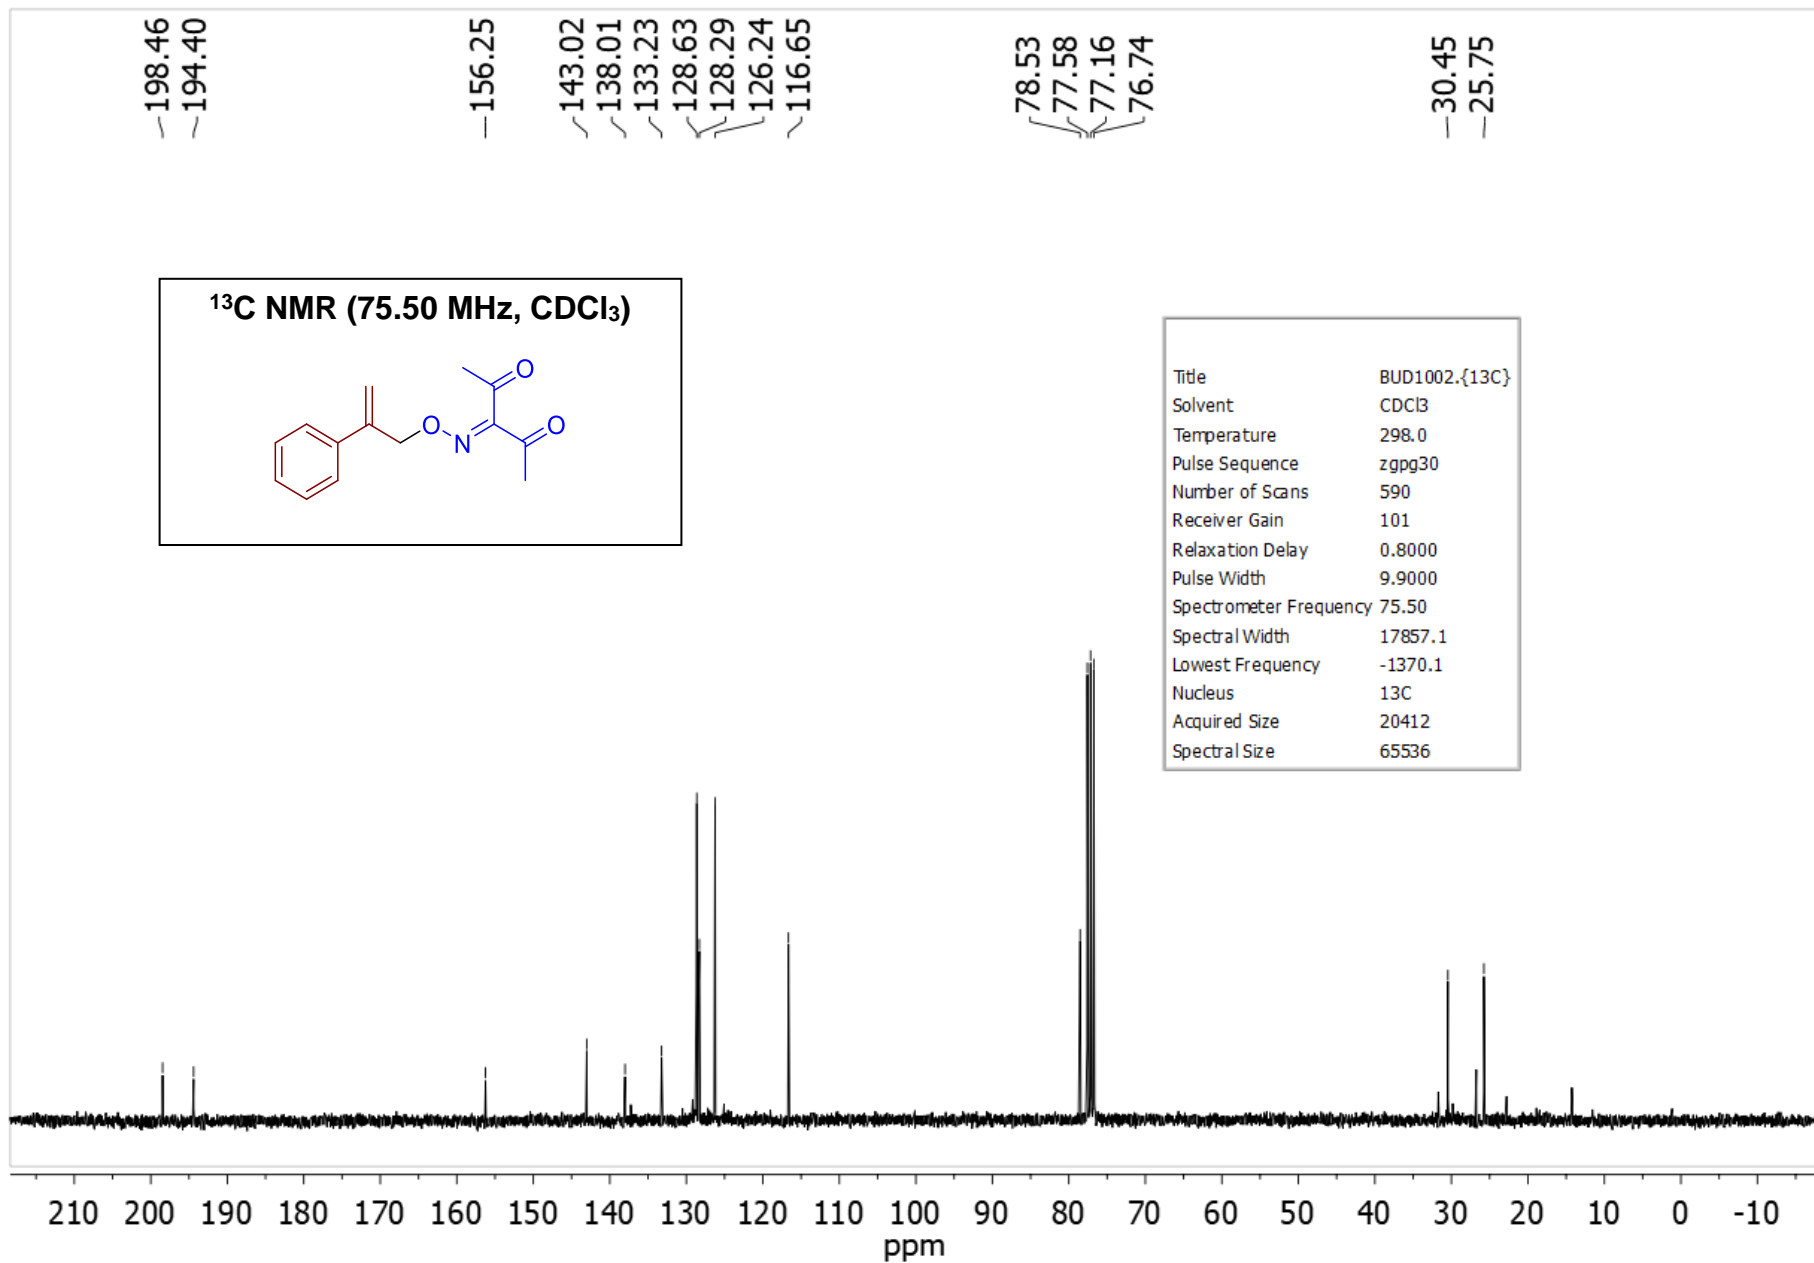

# GC-MS analysis of the crude reaction mixture

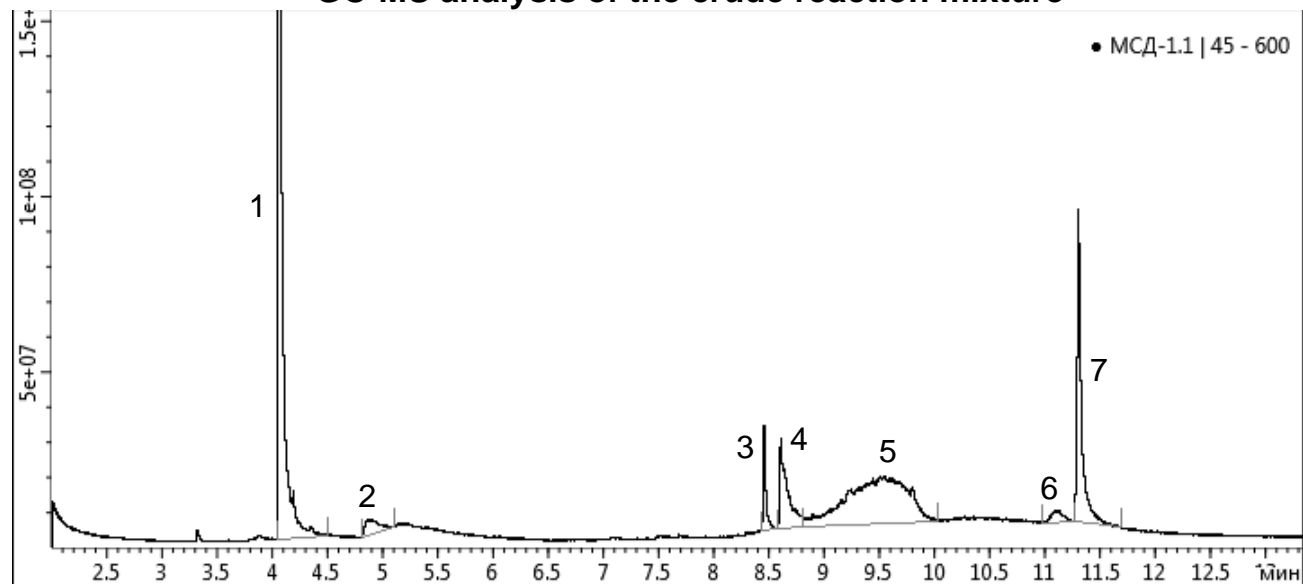

Пик: 4.07 мин (скан #577) Высота: 160367248.00

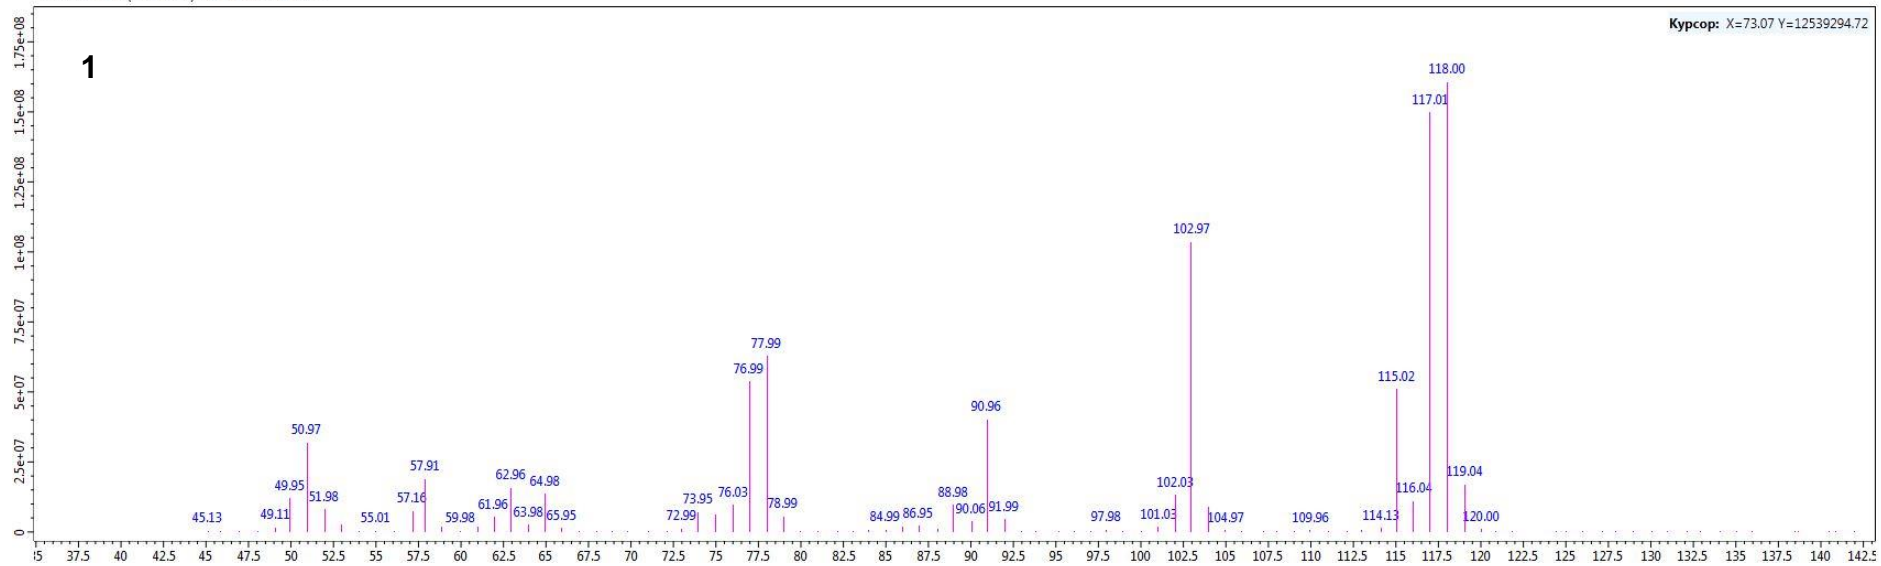

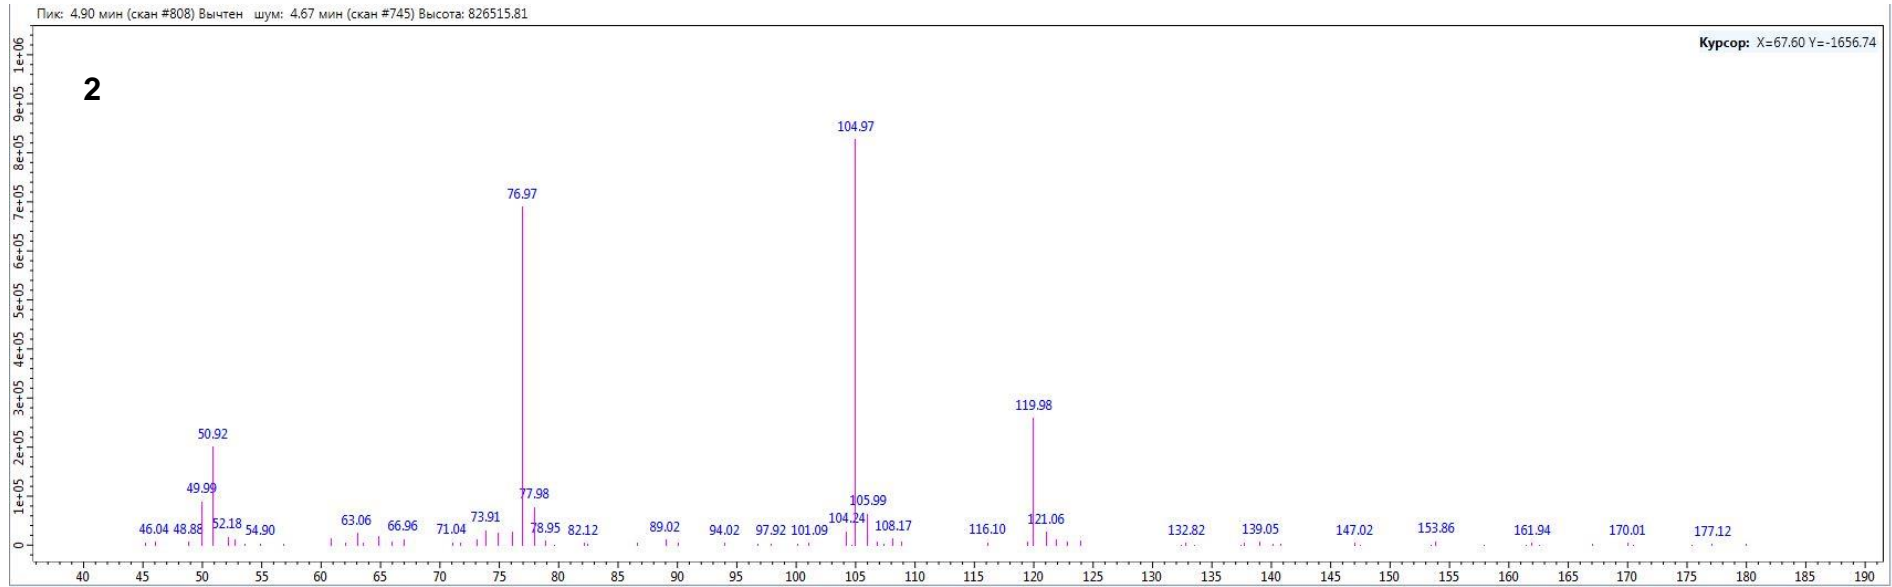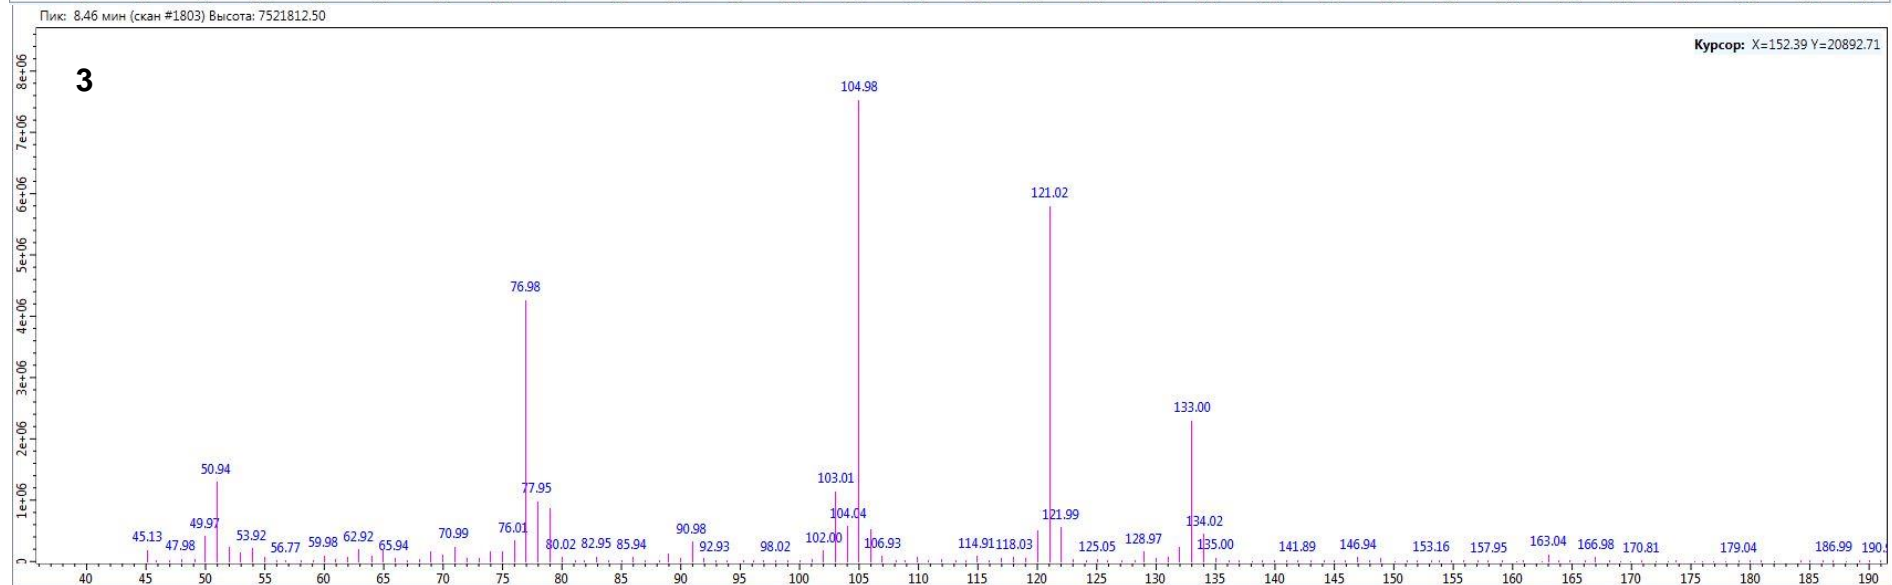

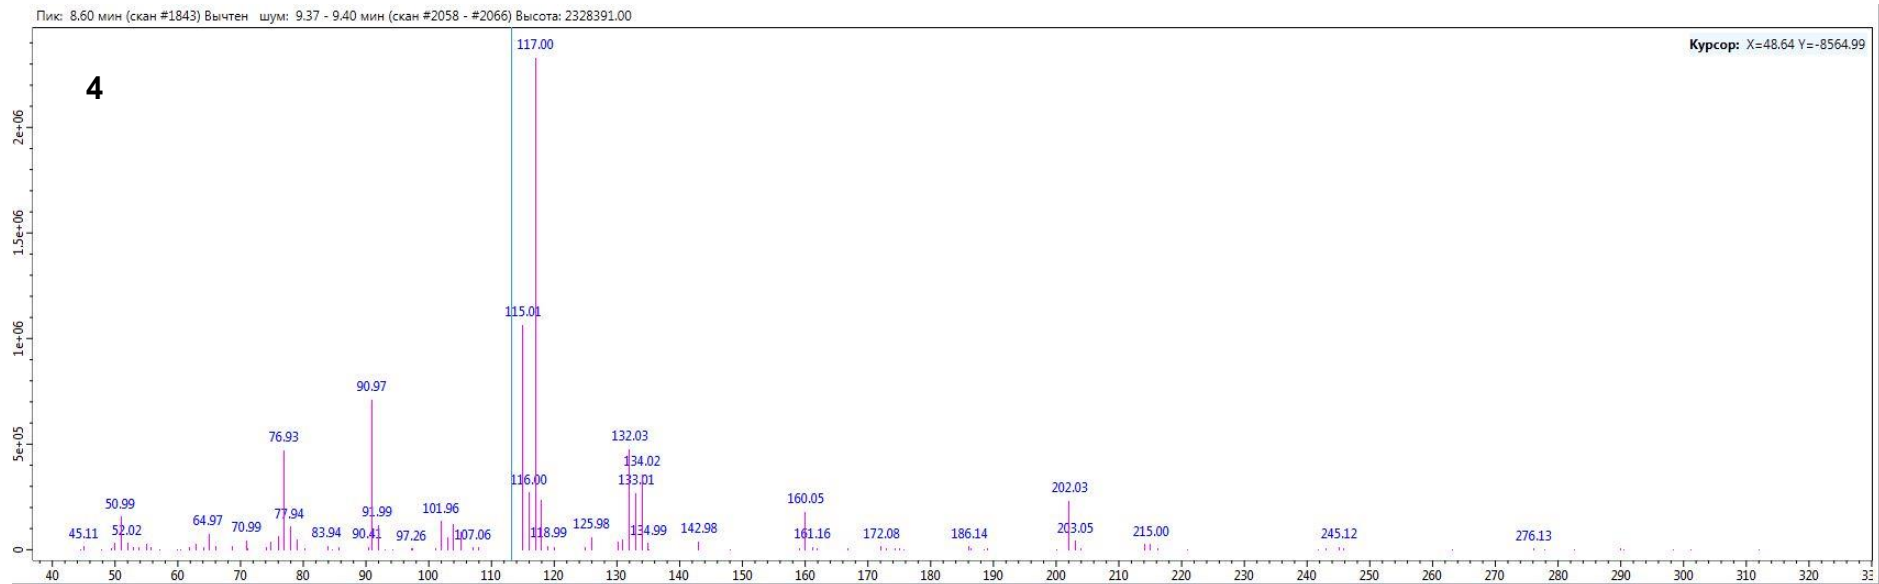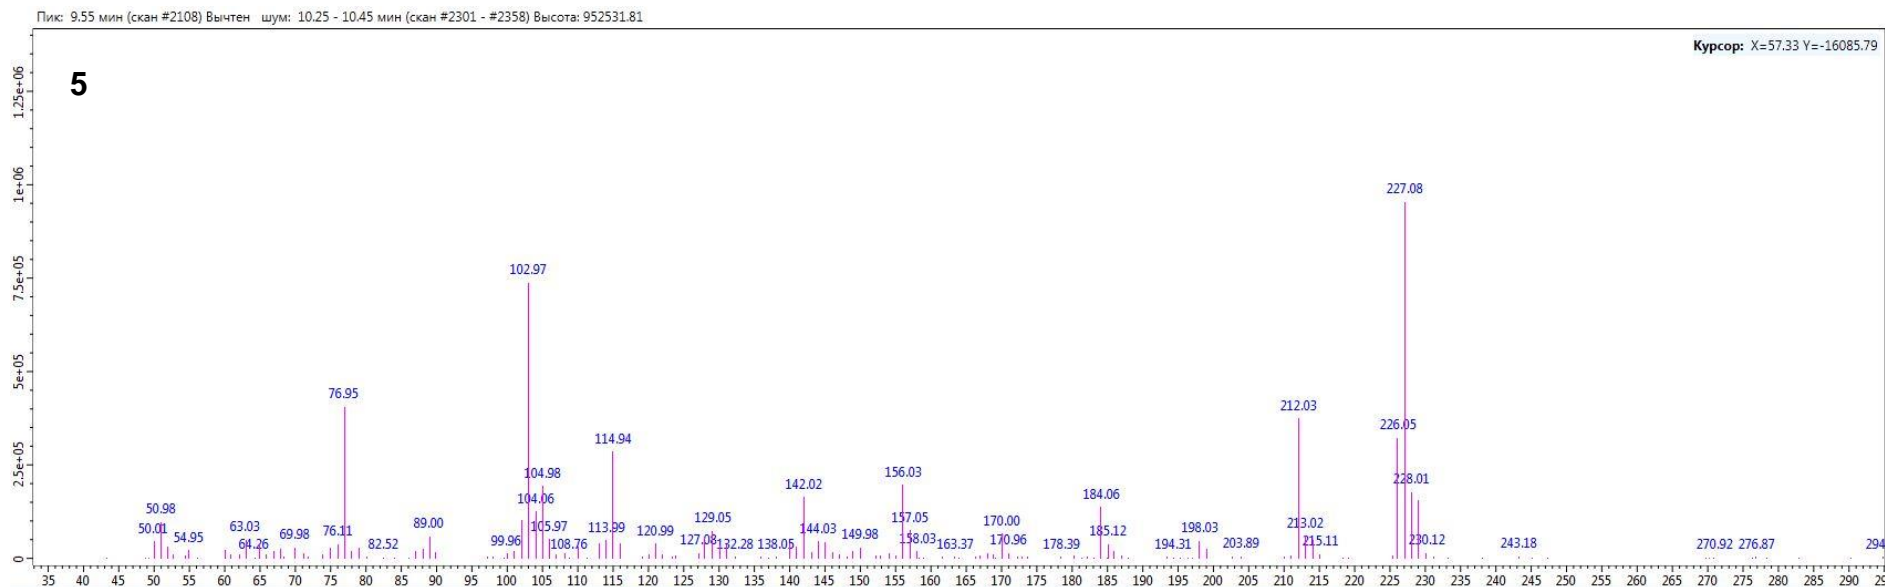

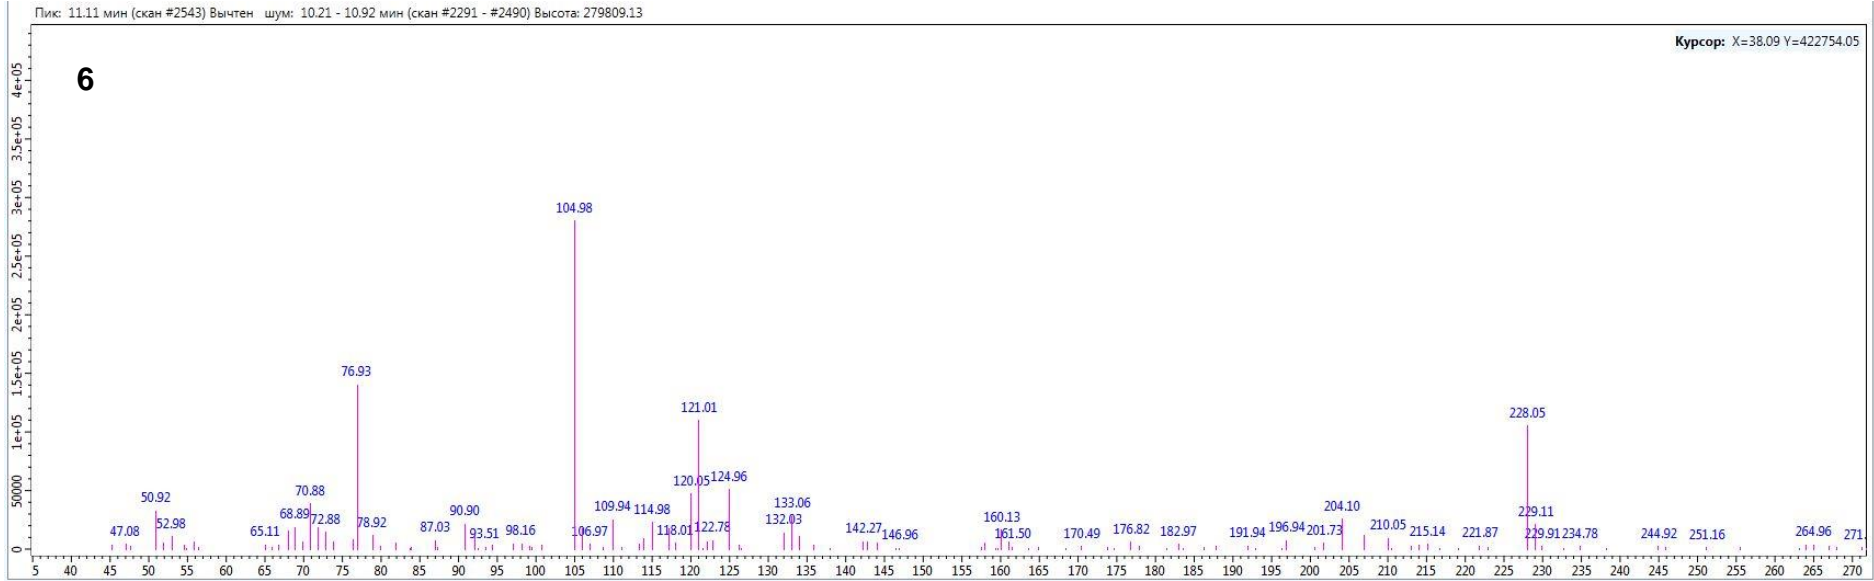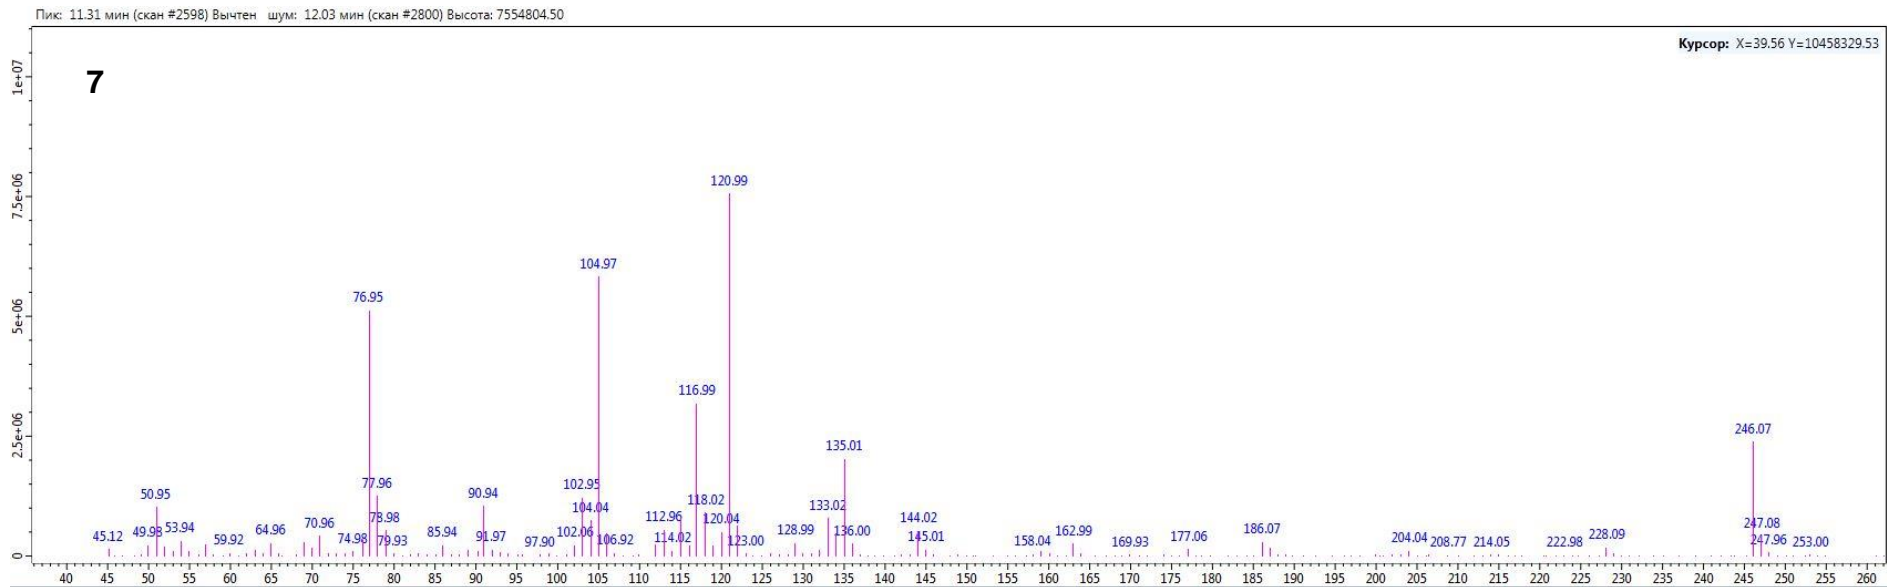



# HRMS analysis of crude reaction mixture

## Display Report

### Analysis Info

Analysis Name D:\Data\Chizhov\Terentiev\Budnikov\sm-171\_&clblow.d  
 Method tune\_low.m  
 Sample Name /TERN SM-171  
 Comment CH3CN 100 %, dil. 2000, calibrant added

Acquisition Date 24.07.2023 12:04:53  
 Operator BDAL@DE  
 Instrument / Ser# micrOTOF 10248

### Acquisition Parameter

|             |            |                      |          |                  |           |
|-------------|------------|----------------------|----------|------------------|-----------|
| Source Type | ESI        | Ion Polarity         | Positive | Set Nebulizer    | 0.4 Bar   |
| Focus       | Not active |                      |          | Set Dry Heater   | 180 °C    |
| Scan Begin  | 50 m/z     | Set Capillary        | 4500 V   | Set Dry Gas      | 4.0 l/min |
| Scan End    | 2000 m/z   | Set End Plate Offset | -500 V   | Set Divert Valve | Waste     |

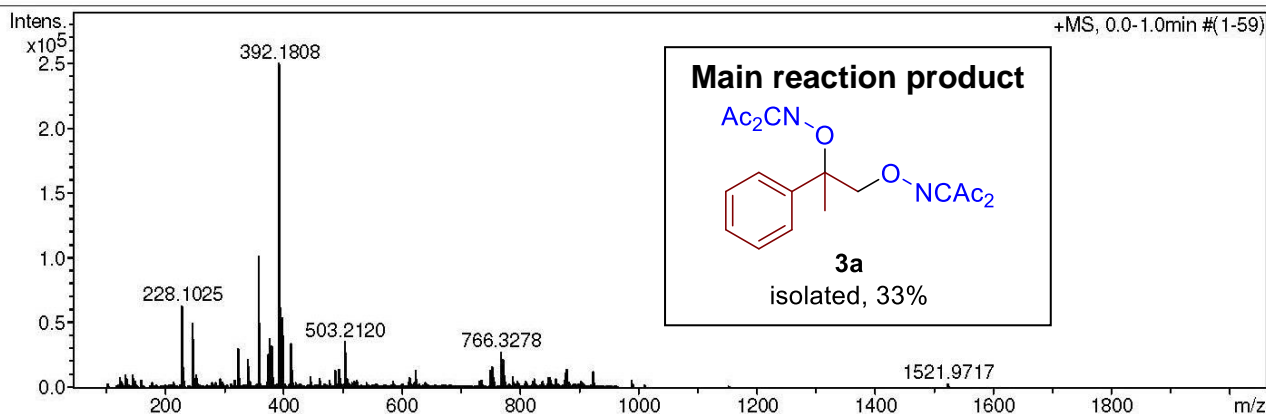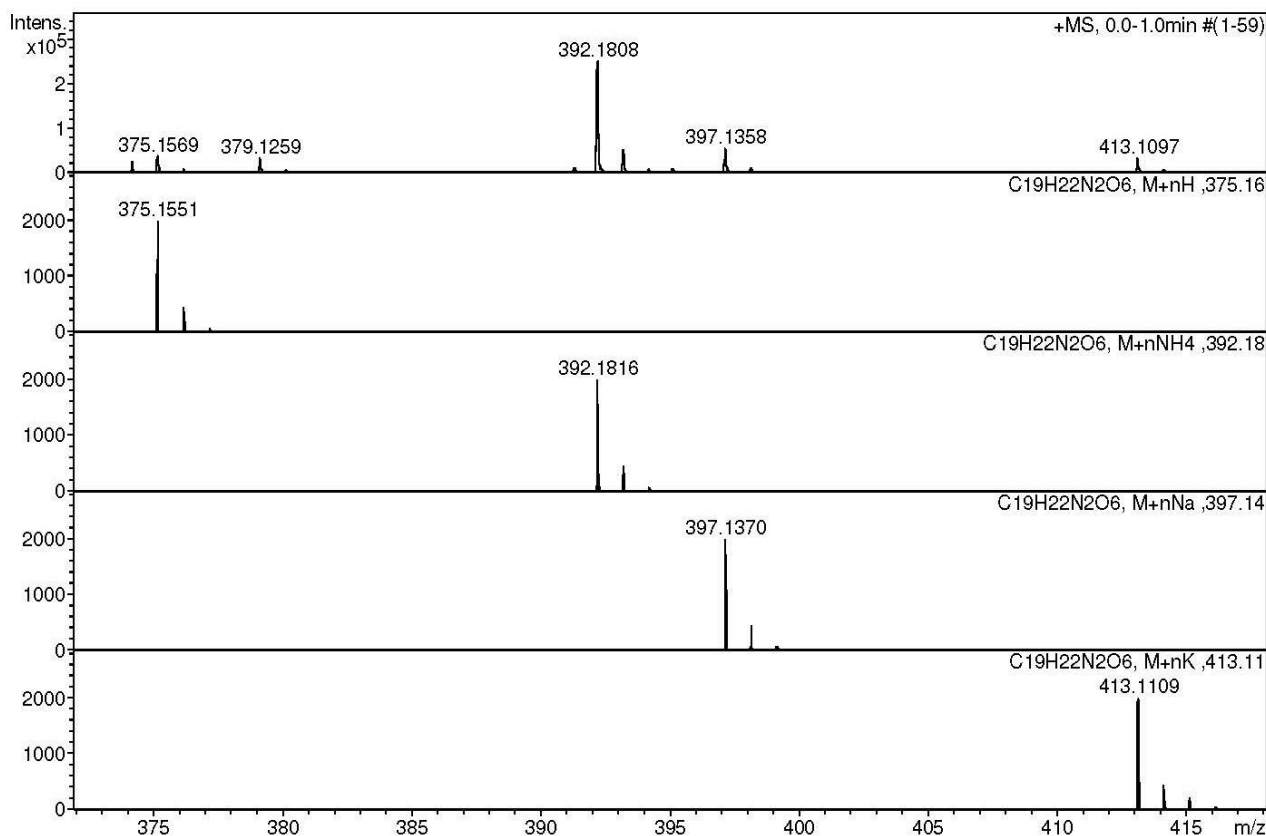

# Display Report

## Analysis Info

Analysis Name D:\Data\Chizhov\Terentiev\Budnikov\sm-171\_&clblow.d  
Method tune\_low.m  
Sample Name /TERN SM-171  
Comment CH3CN 100 %, dil. 2000, calibrant added

Acquisition Date 24.07.2023 12:04:53  
Operator BDAL@DE  
Instrument / Ser# micrOTOF 10248

## Acquisition Parameter

|             |            |                      |          |                  |           |
|-------------|------------|----------------------|----------|------------------|-----------|
| Source Type | ESI        | Ion Polarity         | Positive | Set Nebulizer    | 0.4 Bar   |
| Focus       | Not active |                      |          | Set Dry Heater   | 180 °C    |
| Scan Begin  | 50 m/z     | Set Capillary        | 4500 V   | Set Dry Gas      | 4.0 l/min |
| Scan End    | 2000 m/z   | Set End Plate Offset | -500 V   | Set Divert Valve | Waste     |

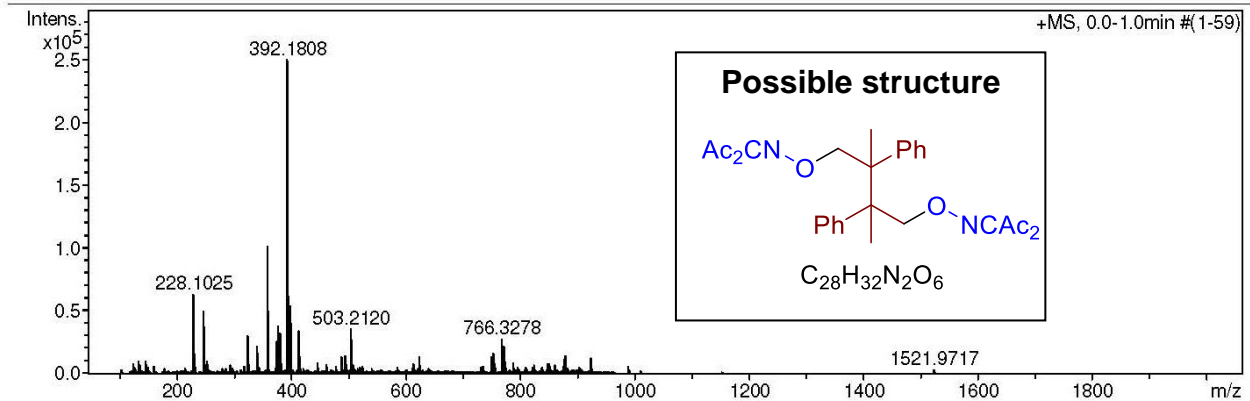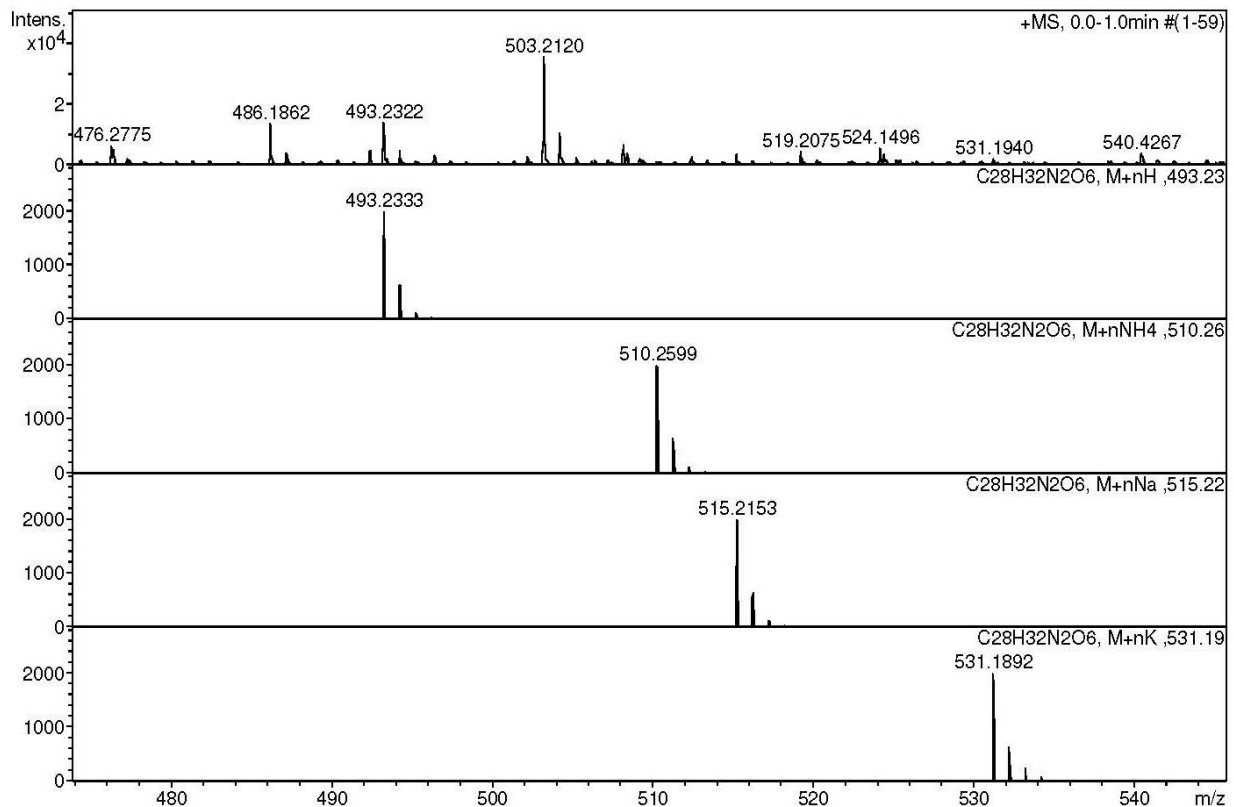

# Display Report

## Analysis Info

Analysis Name D:\Data\Chizhov\Terentiev\Budnikov\sm-171\_&clblow.d  
Method tune\_low.m  
Sample Name /TERN SM-171  
Comment CH3CN 100 %, dil. 2000, calibrant added

Acquisition Date 24.07.2023 12:04:53  
Operator BDAL@DE  
Instrument / Ser# micrOTOF 10248

## Acquisition Parameter

|             |            |                      |          |                  |           |
|-------------|------------|----------------------|----------|------------------|-----------|
| Source Type | ESI        | Ion Polarity         | Positive | Set Nebulizer    | 0.4 Bar   |
| Focus       | Not active |                      |          | Set Dry Heater   | 180 °C    |
| Scan Begin  | 50 m/z     | Set Capillary        | 4500 V   | Set Dry Gas      | 4.0 l/min |
| Scan End    | 2000 m/z   | Set End Plate Offset | -500 V   | Set Divert Valve | Waste     |

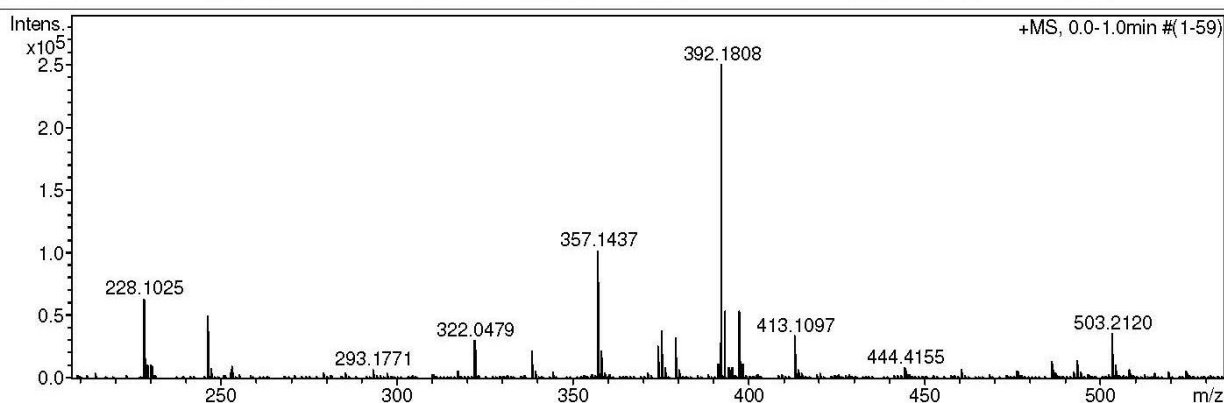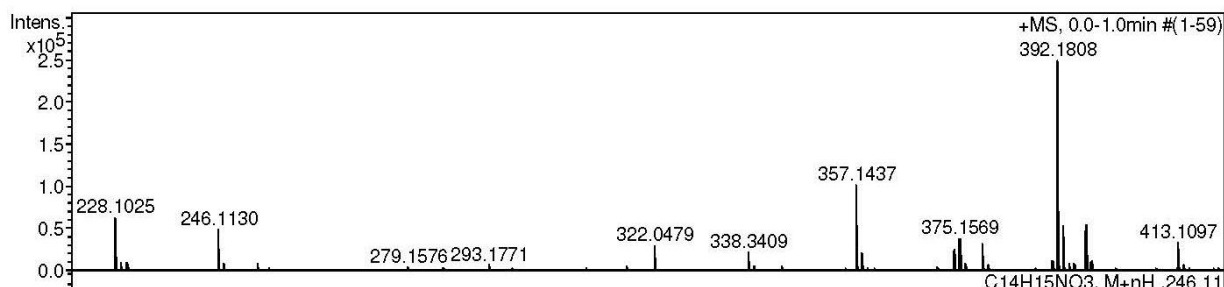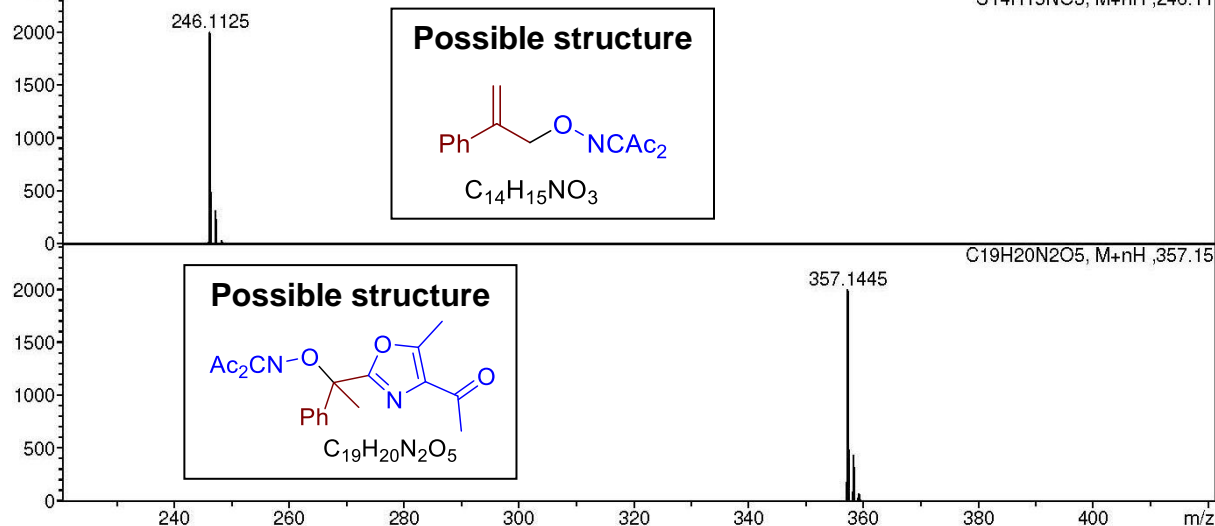

*Reaction with styrene 1b*: the solution of the diacetylinoxyl radical **2** (10 mmol in 125 mL CH<sub>2</sub>Cl<sub>2</sub>) was placed in a two-necked flask. Then styrene **1a** (5 mmol, 520 mg) in CH<sub>2</sub>Cl<sub>2</sub> (2 mL) was added and the reaction mixture was stirred for 24 hours at room temperature under an argon atmosphere. 1,1,2,2-Tetrachloroethane was added as an internal standard, and then the crude reaction mixture was analyzed using <sup>1</sup>H NMR spectroscopy. The reaction mixture was rotary evaporated under a water-jet vacuum and analyzed employing HRMS and GC-MS.

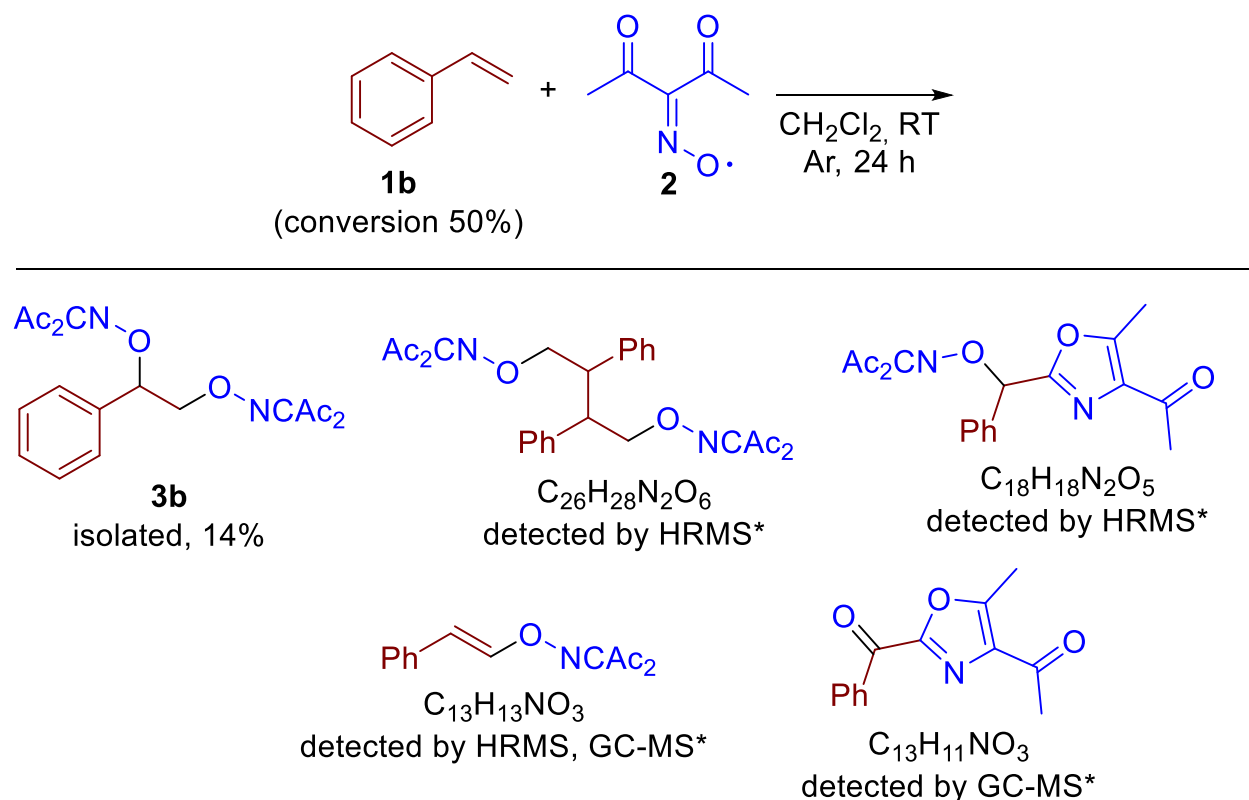

**\*Possible structures proposed based on HRMS and GC-MS data**

**<sup>1</sup>H NMR (300.13 MHz, CH<sub>2</sub>Cl<sub>2</sub>)**

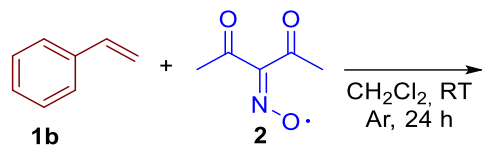

CH<sub>2</sub>Cl<sub>2</sub>

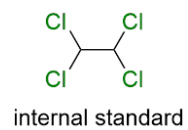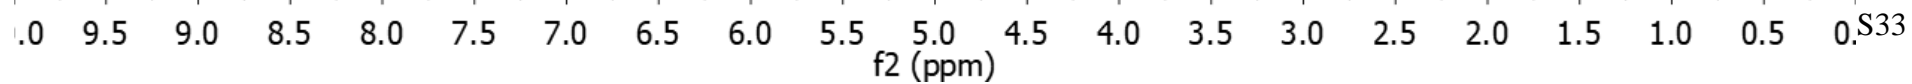

7.41  
7.40  
7.39  
7.36  
7.34  
7.31  
7.29  
7.26  
7.23  
6.76  
6.72  
6.70  
6.66  
5.77  
5.71  
5.25  
5.21  
2.60  
2.53  
2.52  
2.51  
2.50  
2.49  
2.47  
2.45  
2.44  
2.40  
2.38  
2.38  
2.37  
2.36  
2.35  
2.34  
2.33  
2.31  
2.30  
2.29  
2.29  
2.28  
2.27  
2.24  
2.22  
2.21  
2.14  
2.05  
1.84  
1.45  
0.07

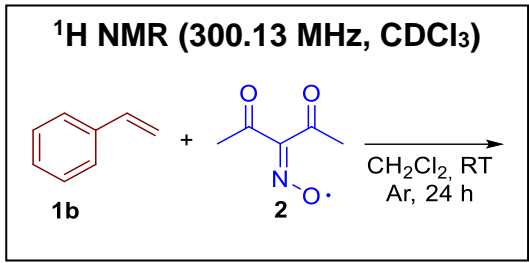

|                          |                   |
|--------------------------|-------------------|
| 1 Solvent                | CDCl <sub>3</sub> |
| 2 Temperature            | 298.0             |
| 3 Pulse Sequence         | zg                |
| 4 Number of Scans        | 1                 |
| 5 Receiver Gain          | 32.0              |
| 6 Relaxation Delay       | 0.1000            |
| 7 Pulse Width            | 14.7000           |
| 8 Acquisition Time       | 2.7724            |
| 9 Spectrometer Frequency | 300.23            |
| 10 Spectral Width        | 5882.4            |
| 11 Lowest Frequency      | -1094.5           |
| 12 Nucleus               | <sup>1</sup> H    |
| 13 Acquired Size         | 16308             |
| 14 Spectral Size         | 65536             |

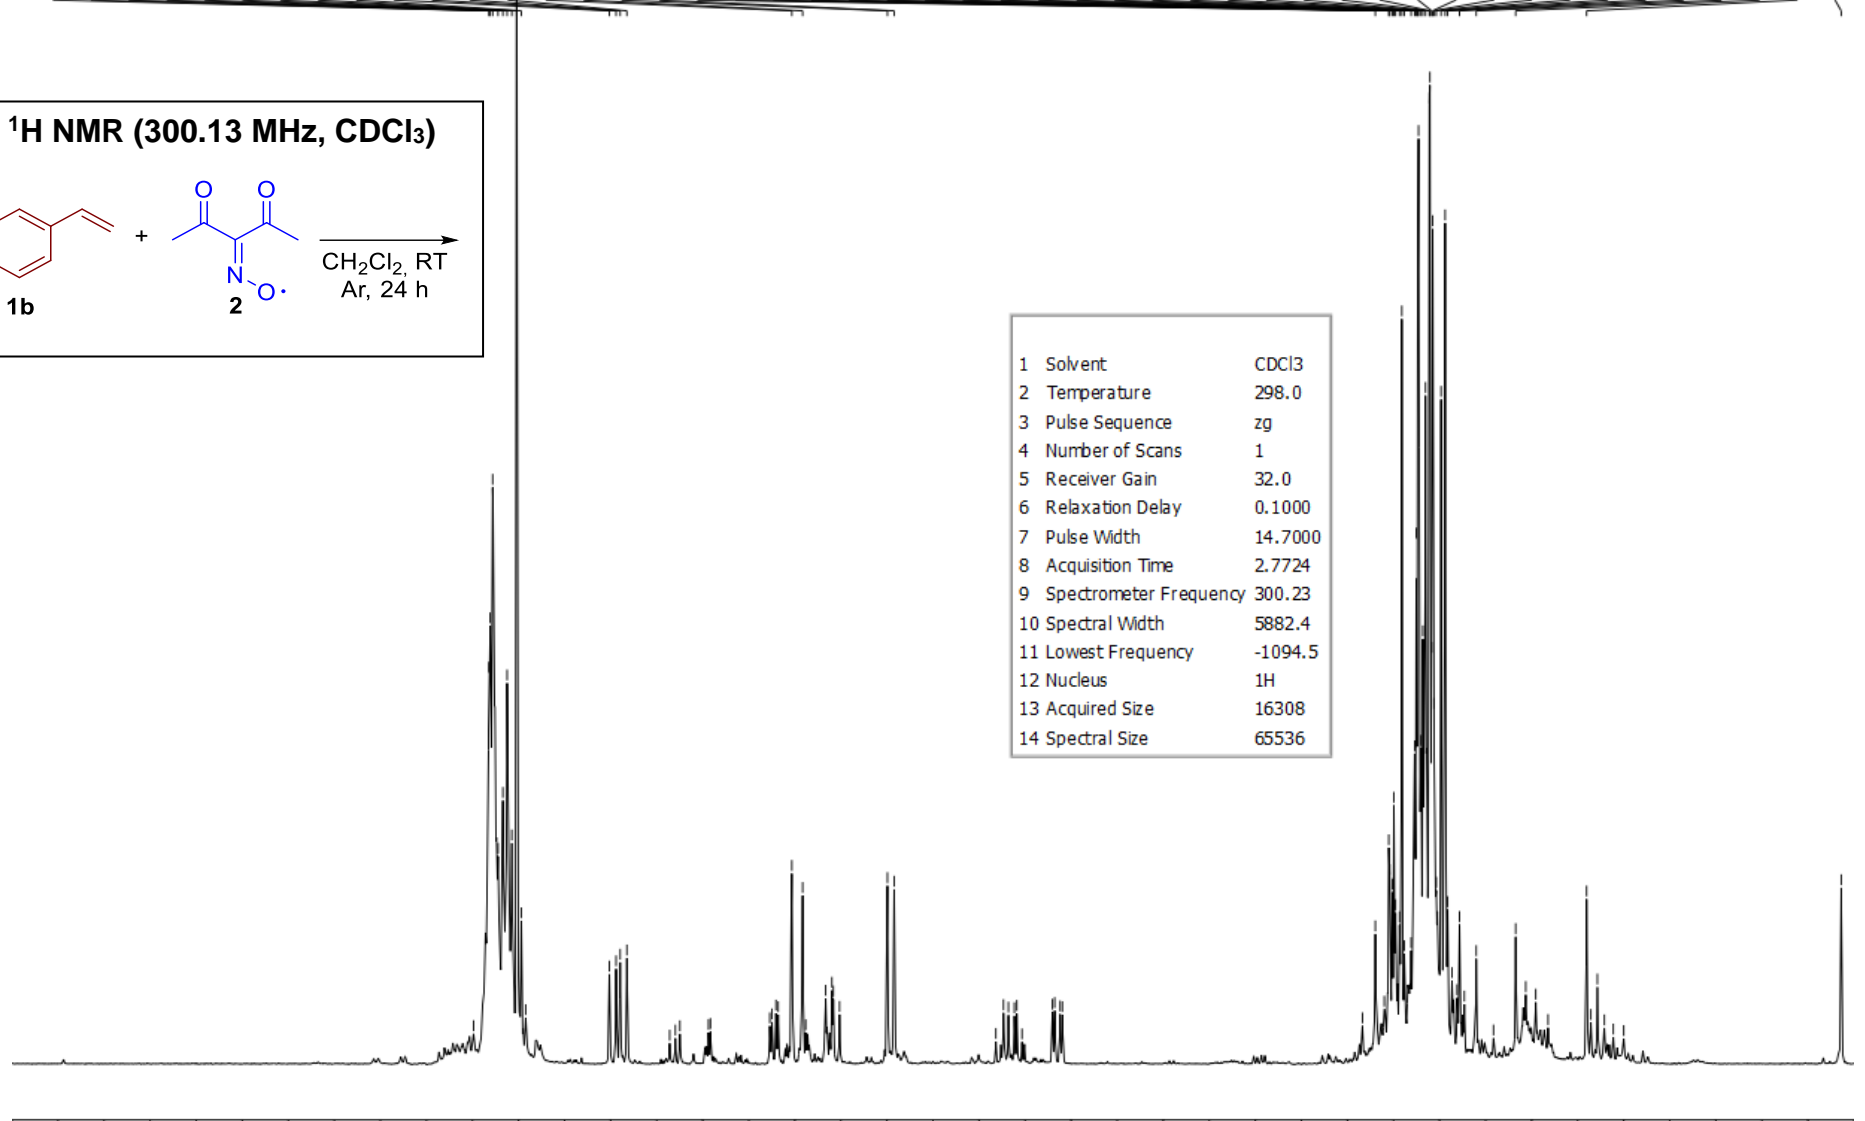

10 9.5 9.0 8.5 8.0 7.5 7.0 6.5 6.0 5.5 5.0 4.5 4.0 3.5 3.0 2.5 2.0 1.5 1.0 0.5 0.0 S34

198.17  
 197.99  
 197.58  
 194.15  
 194.06  
 188.75  
 156.98  
 156.73  
 137.63  
 136.96  
 135.95  
 135.81  
 129.53  
 129.27  
 129.14  
 129.12  
 129.00  
 128.97  
 128.87  
 128.73  
 128.59  
 128.39  
 128.11  
 128.04  
 127.88  
 127.60  
 127.03  
 126.90  
 126.69  
 126.28  
 113.88  
 103.99  
 86.89  
 77.58  
 77.16  
 76.74  
 30.83  
 30.59  
 30.54  
 30.52  
 30.04  
 28.96  
 27.19  
 25.87  
 25.77  
 25.72  
 25.69  
 20.70

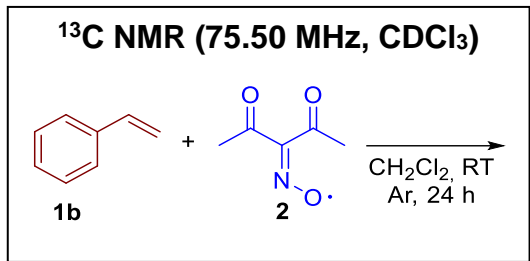

|    |                        |                               |
|----|------------------------|-------------------------------|
| 1  | Title                  | BUD984- <sup>13</sup> C-2.fid |
| 2  | Solvent                | CDCl <sub>3</sub>             |
| 3  | Temperature            | 298.0                         |
| 4  | Pulse Sequence         | zgpg30                        |
| 5  | Number of Scans        | 1024                          |
| 6  | Receiver Gain          | 101.0                         |
| 7  | Relaxation Delay       | 0.8000                        |
| 8  | Pulse Width            | 9.9000                        |
| 9  | Acquisition Time       | 1.1431                        |
| 10 | Spectrometer Frequency | 75.50                         |
| 11 | Spectral Width         | 17857.1                       |
| 12 | Lowest Frequency       | -1373.3                       |
| 13 | Nucleus                | <sup>13</sup> C               |
| 14 | Acquired Size          | 20412                         |
| 15 | Spectral Size          | 65536                         |

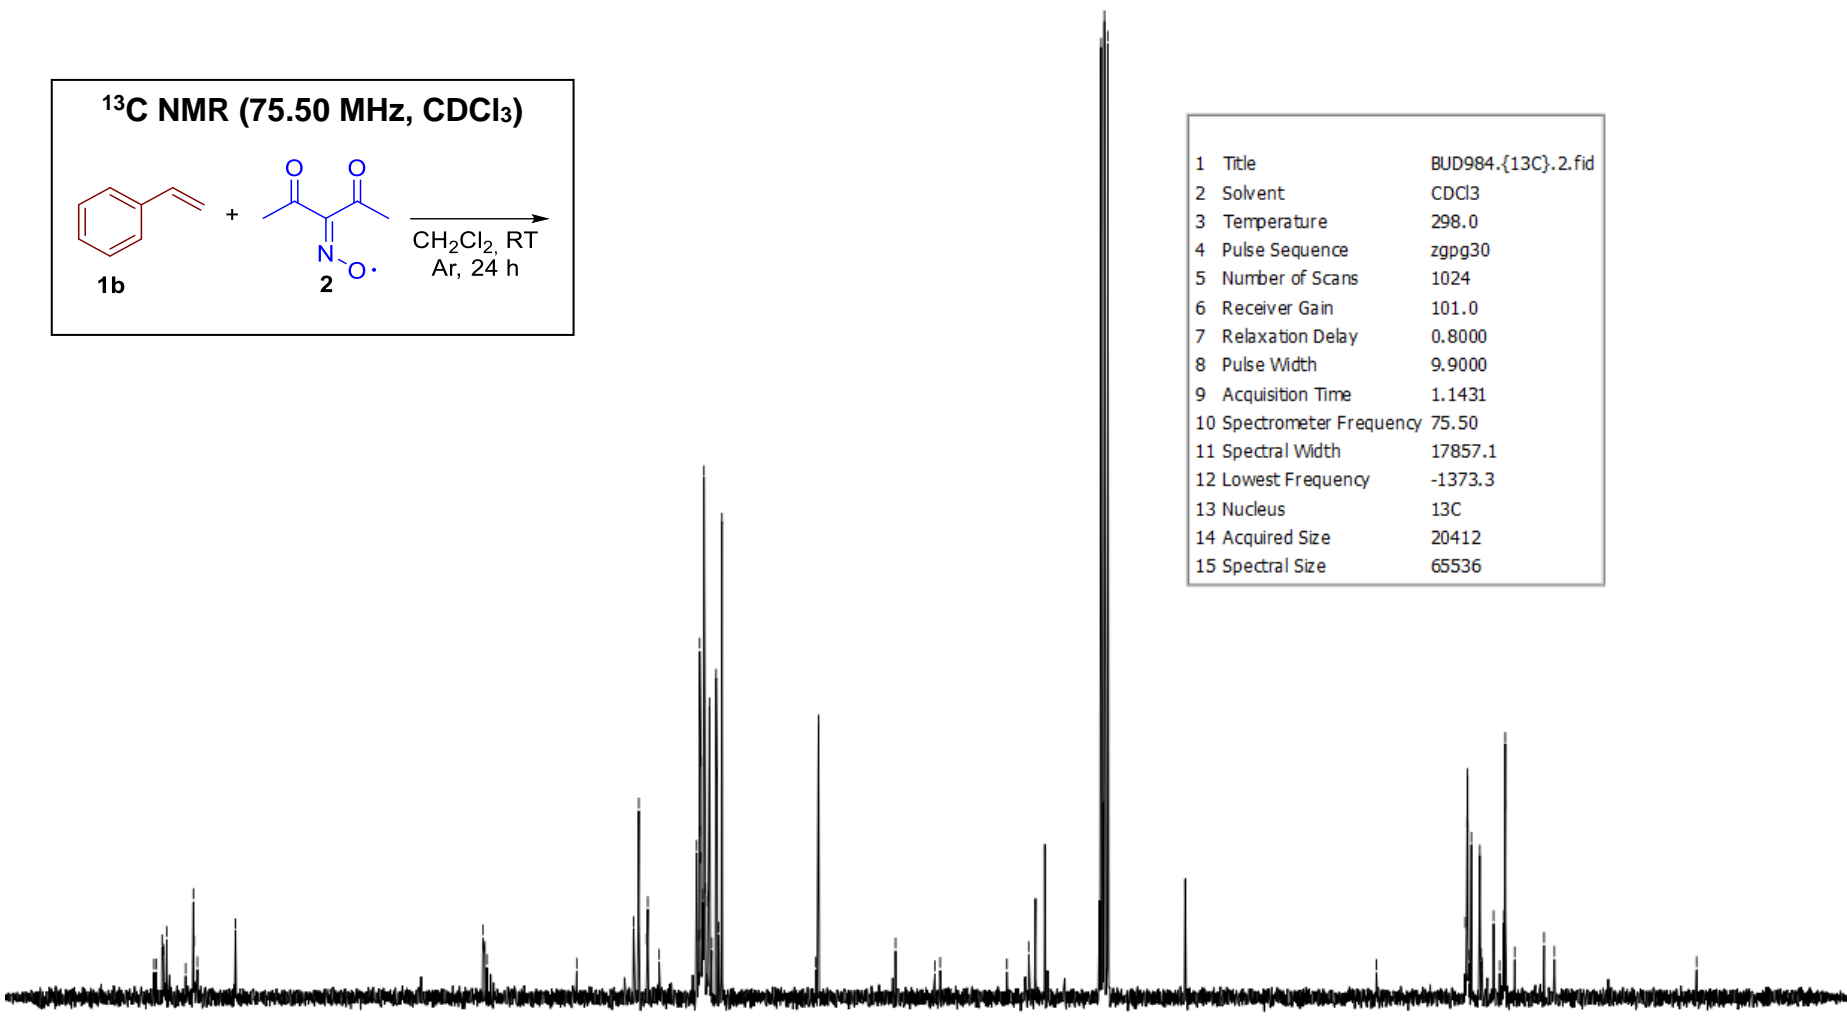

210 200 190 180 170 160 150 140 130 120 110 100 90 80 70 60 50 40 30 20 10 0 -10 S35  
 f2 (ppm)

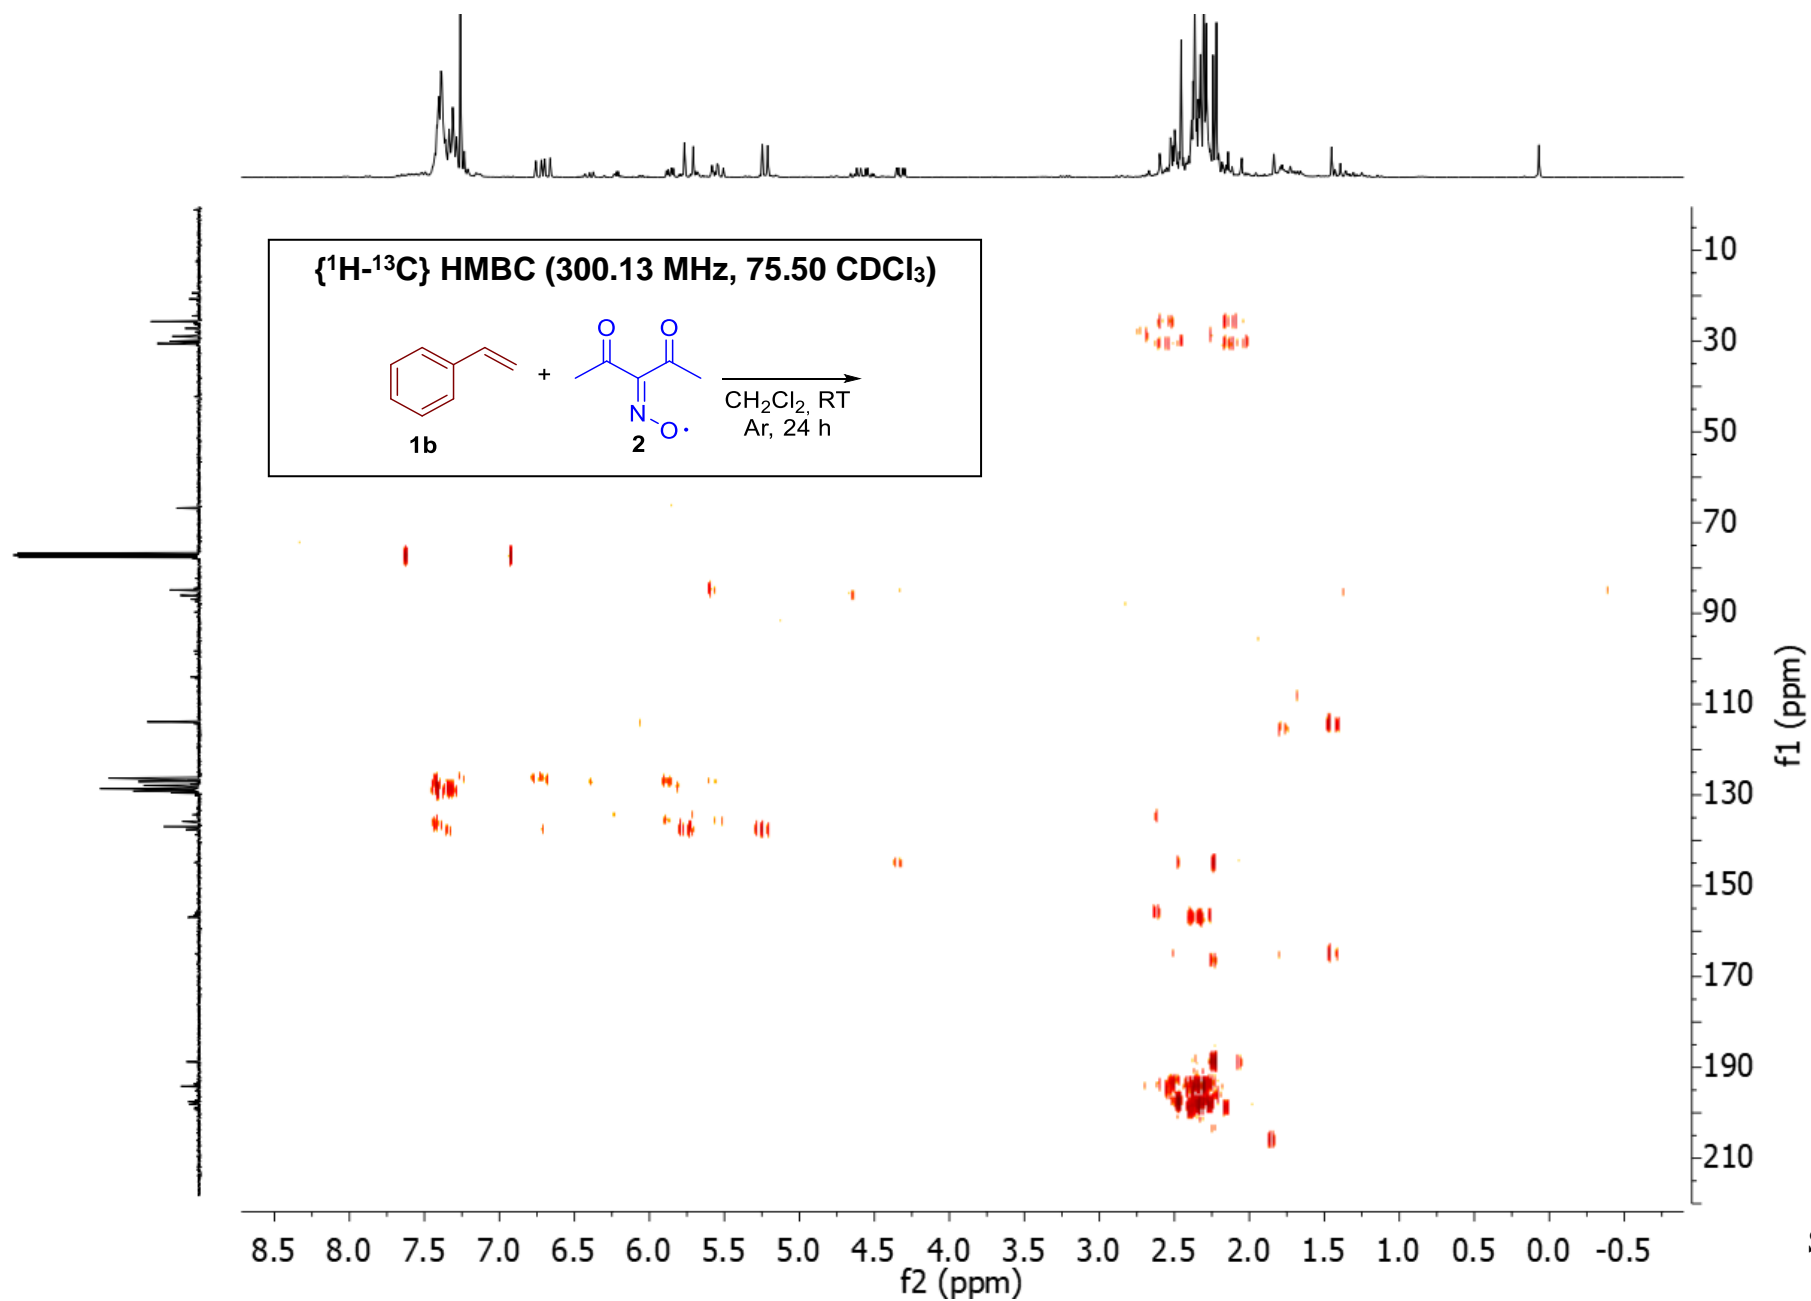



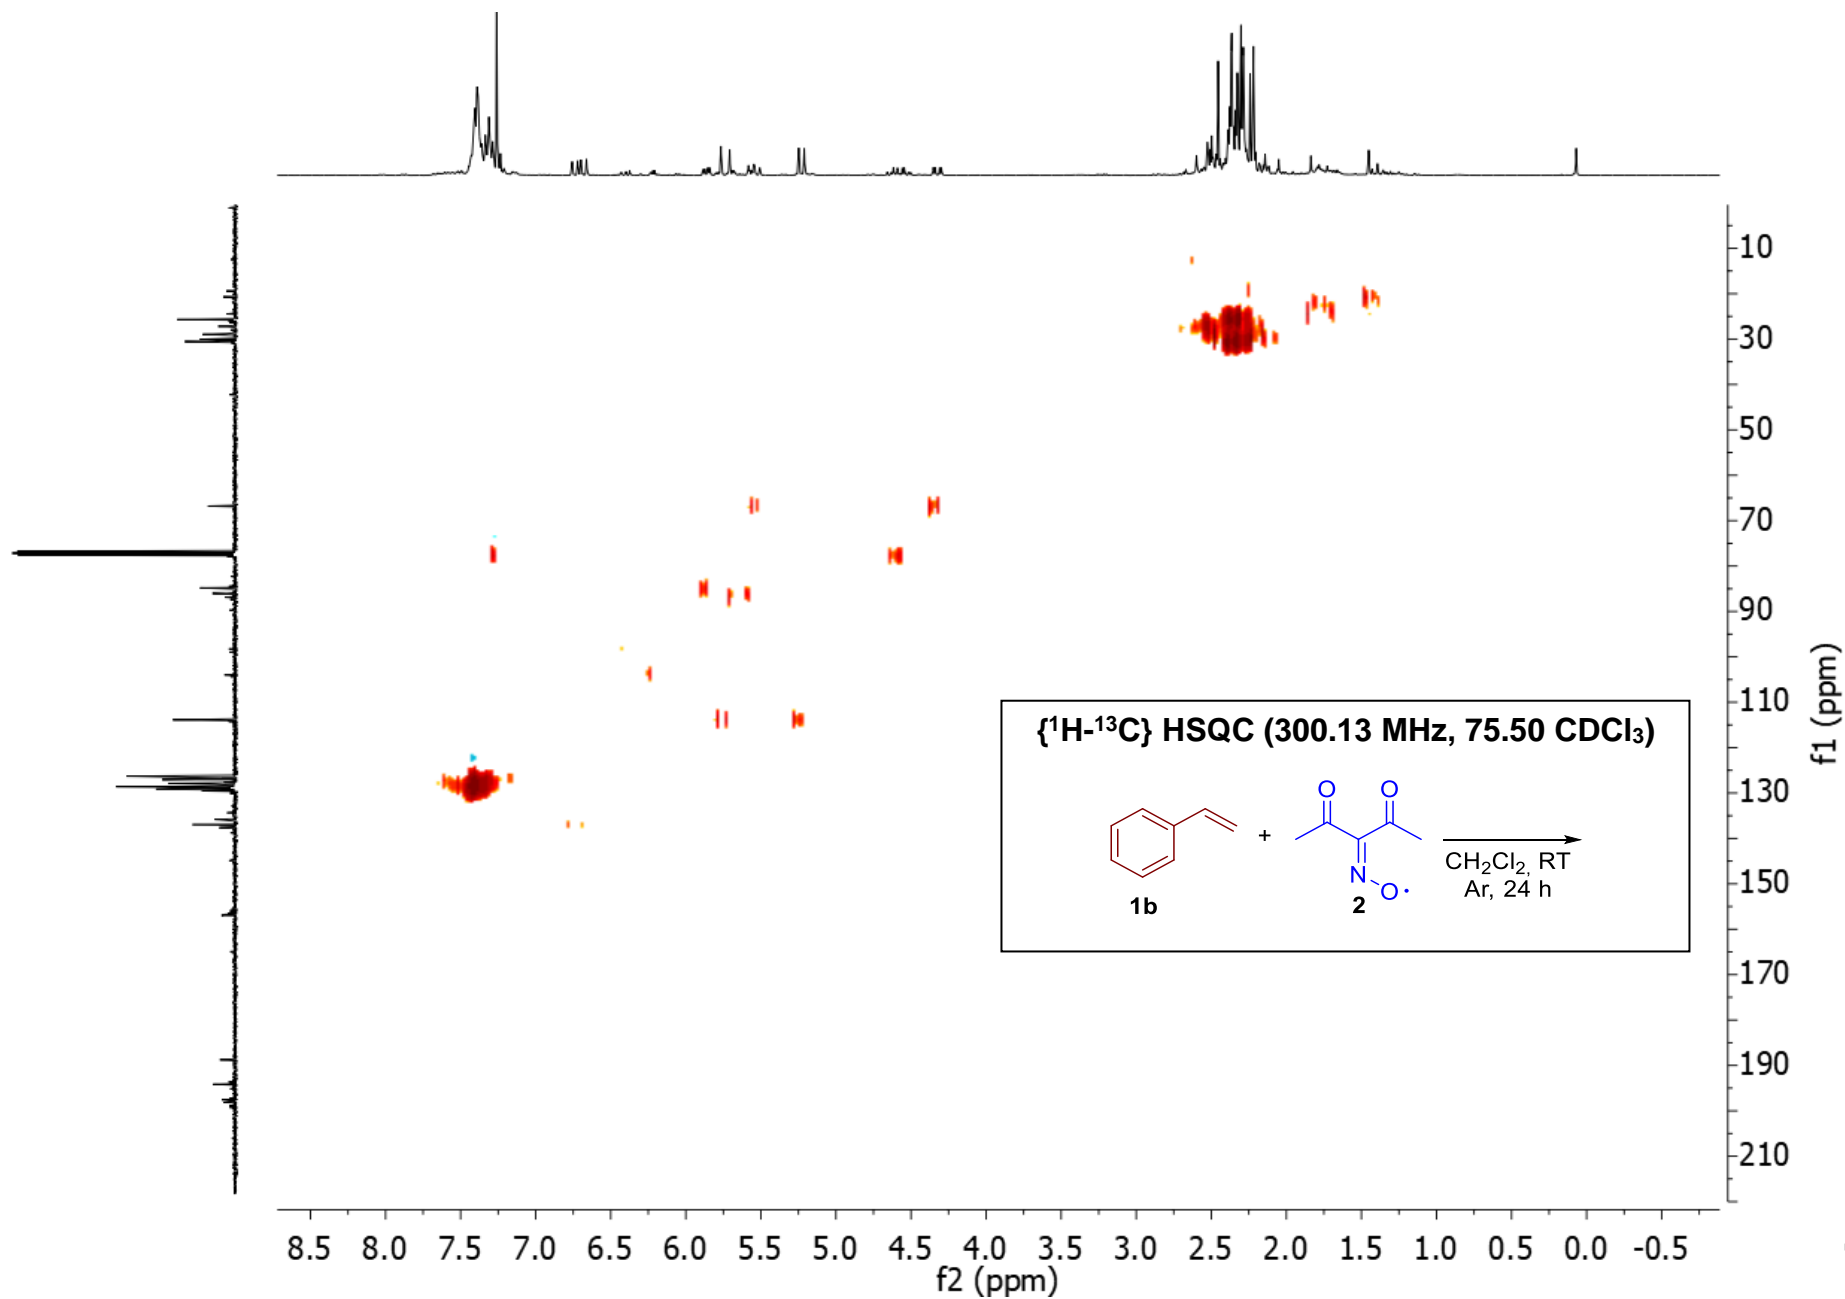

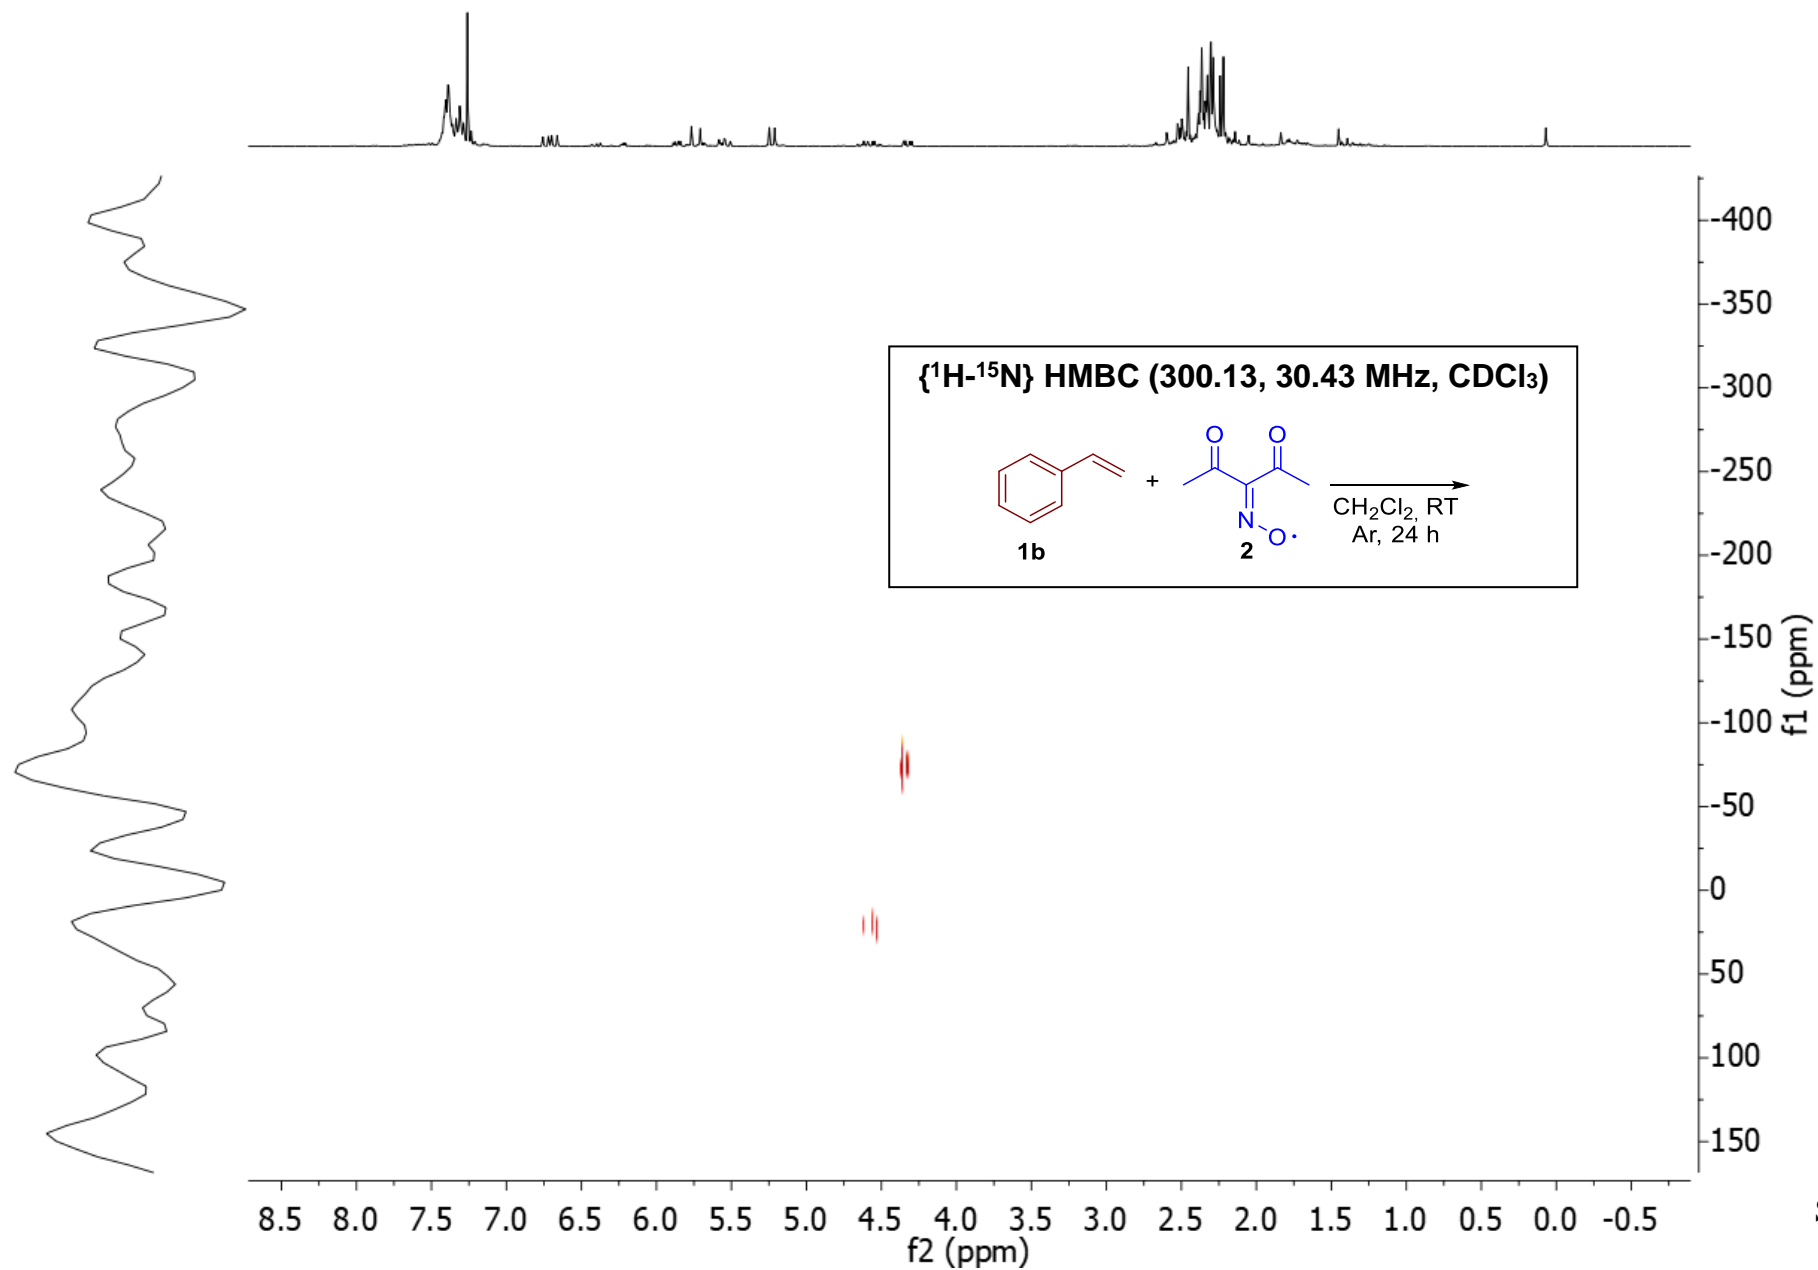

# GC-MS analysis of crude reaction mixture

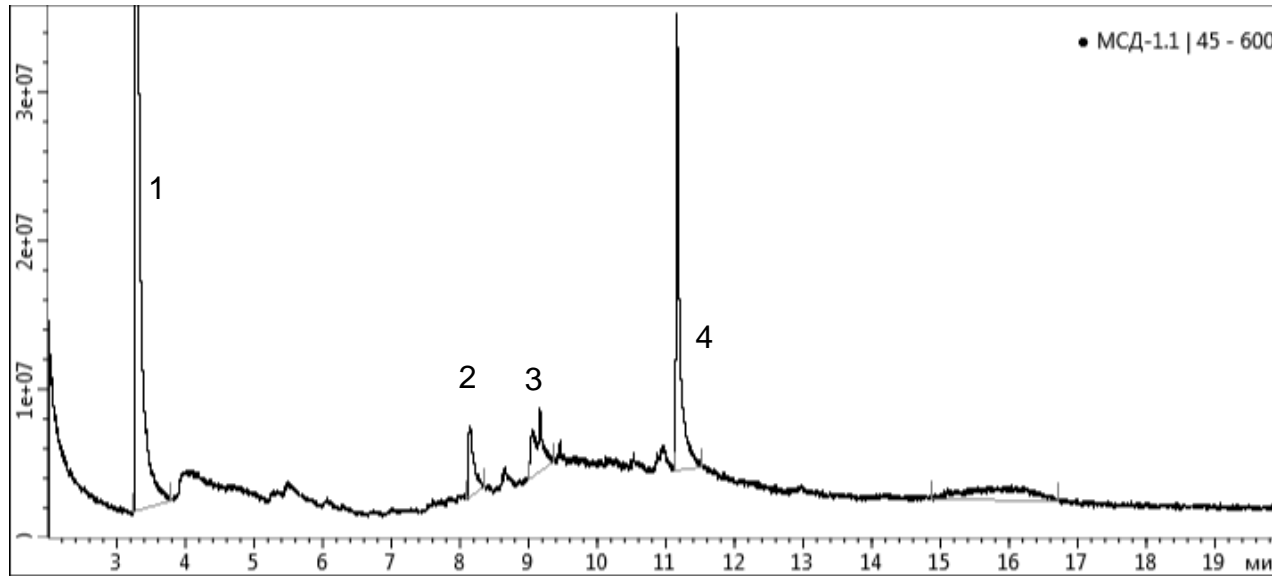

• МСД-1.1 | 45 - 600

Пик: 3.33 мин (скан #372) Вычтен шум: 3.10 мин (скан #307) Высота: 3454047.50

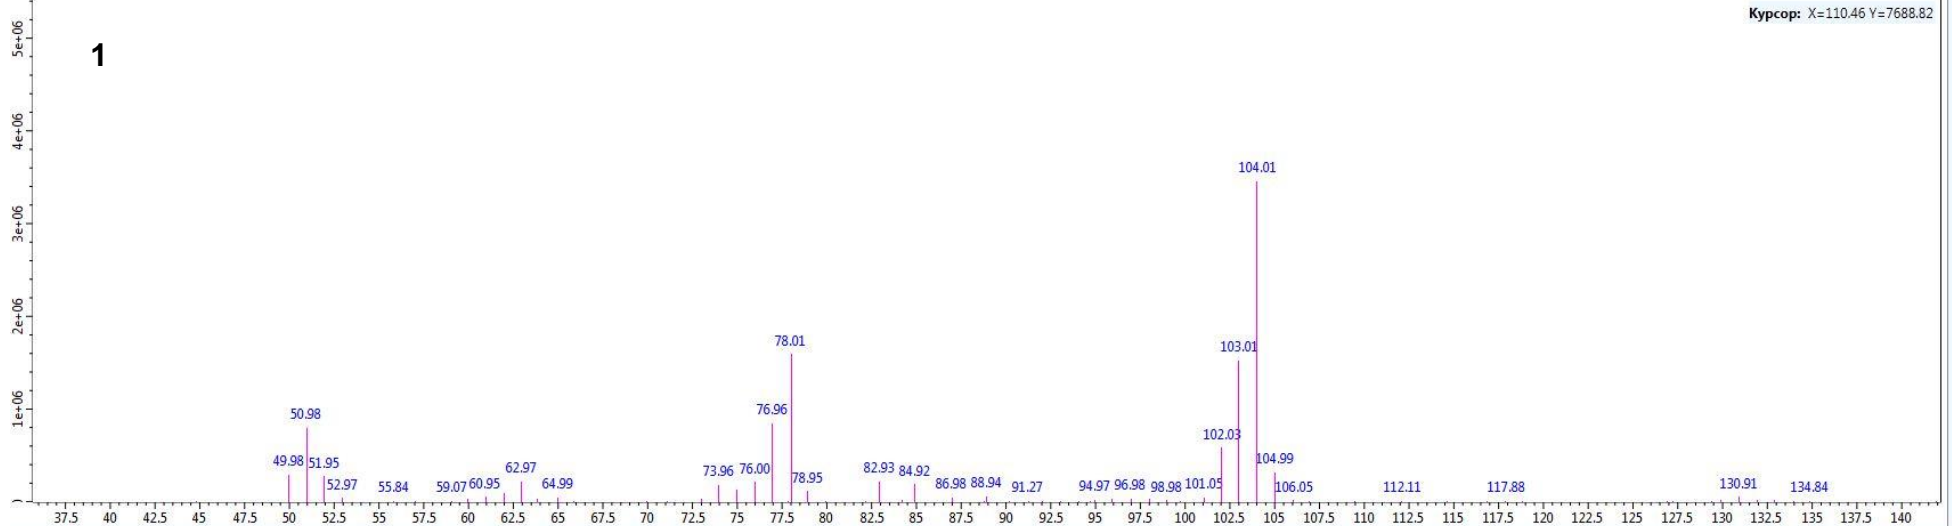

Курсор: X=110.46 Y=7688.82

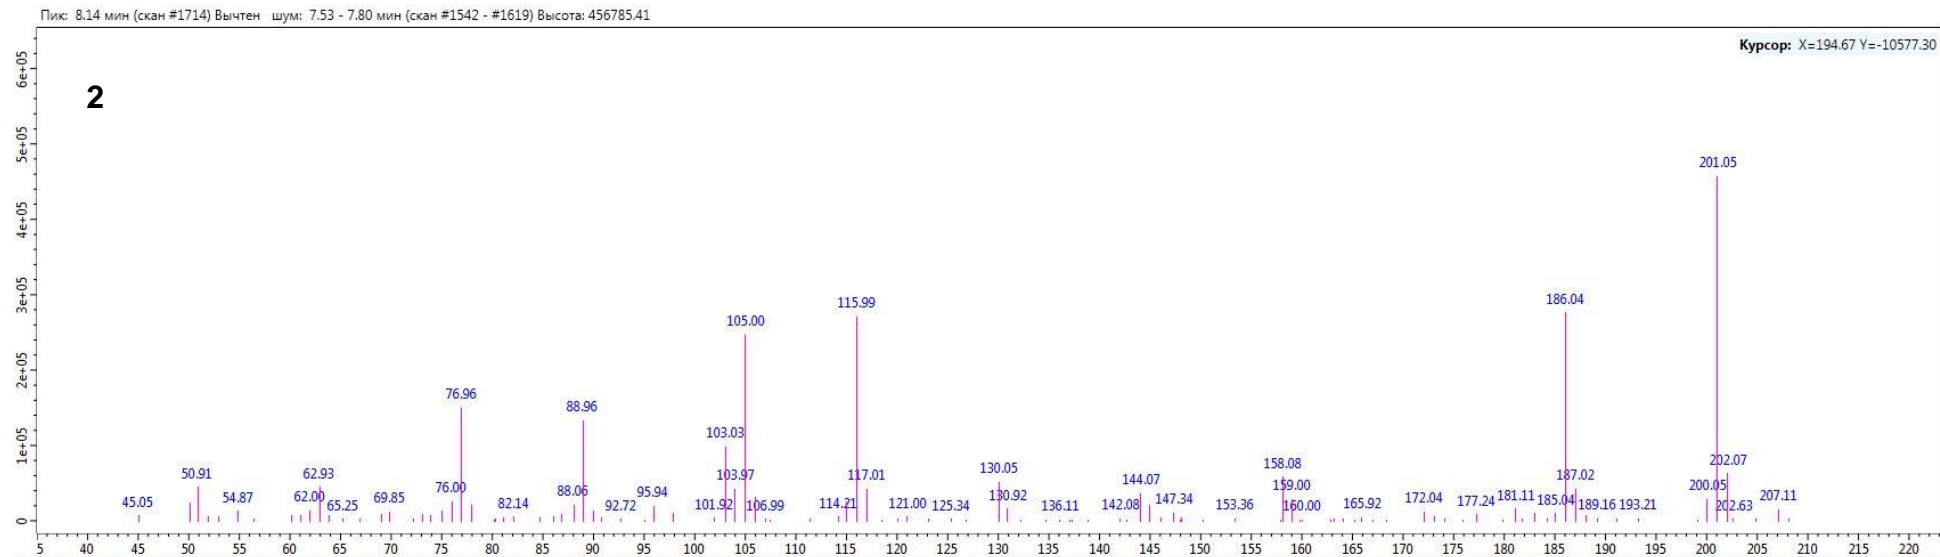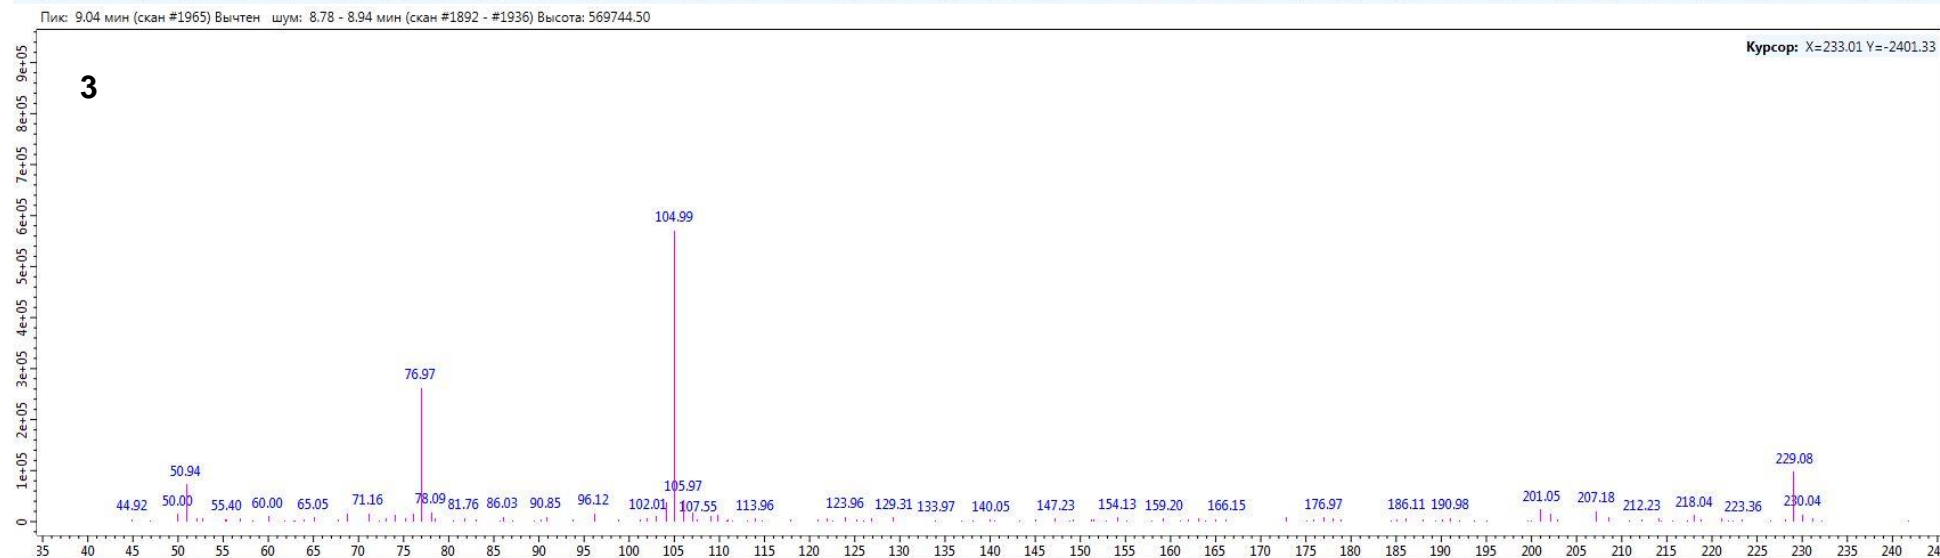

Пик: 11.16 мин (скан #2557) Вычтен шум: 11.08 мин (скан #2534) Высота: 1931538.88

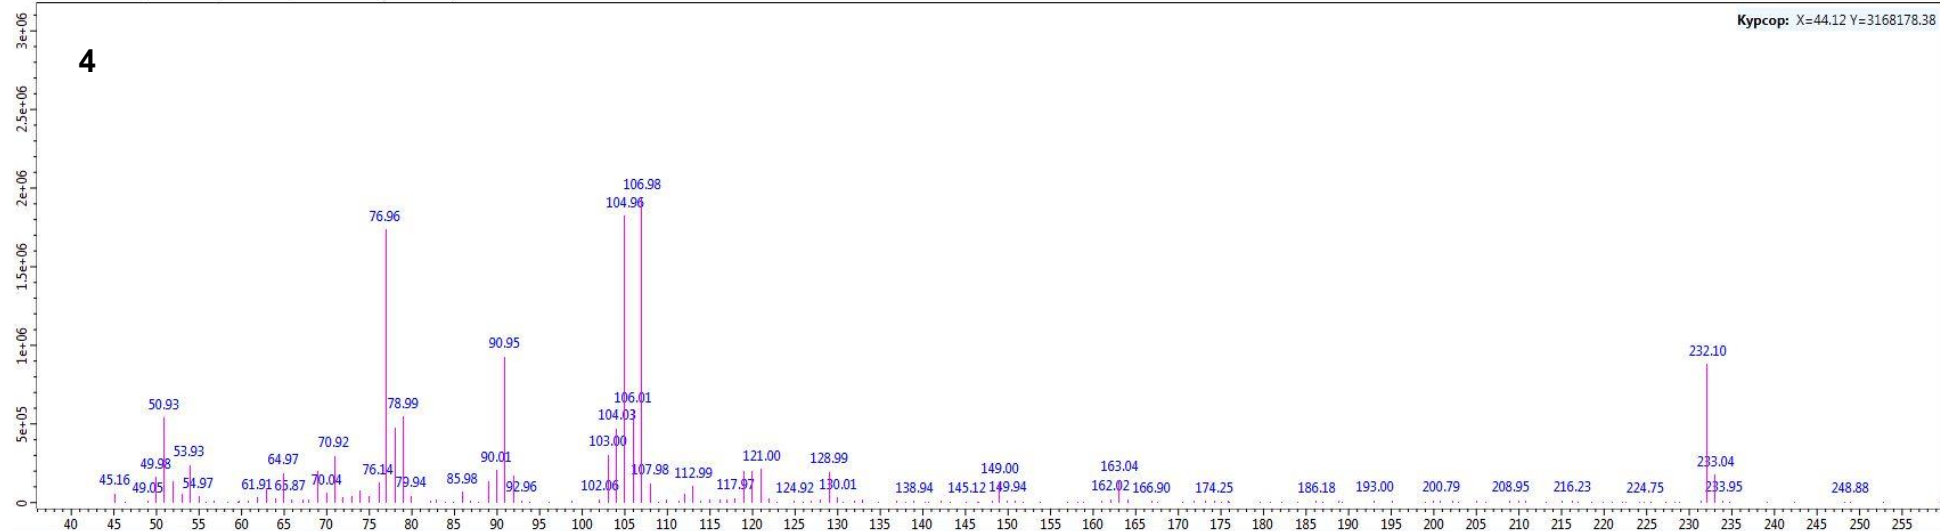

# HRMS analysis of crude reaction mixture

## Display Report

### Analysis Info

Analysis Name D:\Data\Chizhov\Terentiev\Budnikov\sm-169\_&clblow.d  
 Method tune\_low.m  
 Sample Name /TERN SM-169  
 Comment CH3CN 100 %, dil. 200, calibrant added

Acquisition Date 20.07.2023 12:41:45  
 Operator BDAL@DE  
 Instrument / Ser# micrOTOF 10248

### Acquisition Parameter

|             |            |                      |          |                  |           |
|-------------|------------|----------------------|----------|------------------|-----------|
| Source Type | ESI        | Ion Polarity         | Positive | Set Nebulizer    | 0.4 Bar   |
| Focus       | Not active |                      |          | Set Dry Heater   | 180 °C    |
| Scan Begin  | 50 m/z     | Set Capillary        | 4500 V   | Set Dry Gas      | 4.0 l/min |
| Scan End    | 2000 m/z   | Set End Plate Offset | -500 V   | Set Divert Valve | Waste     |

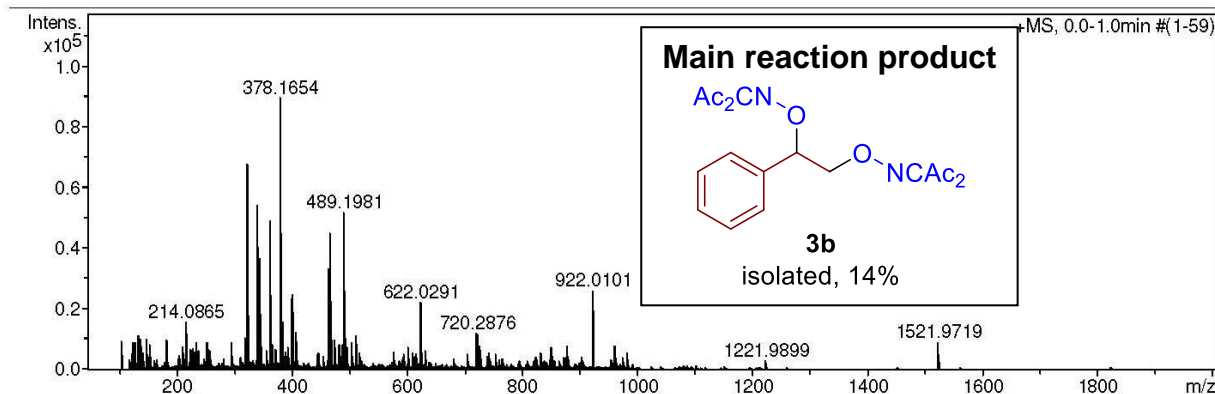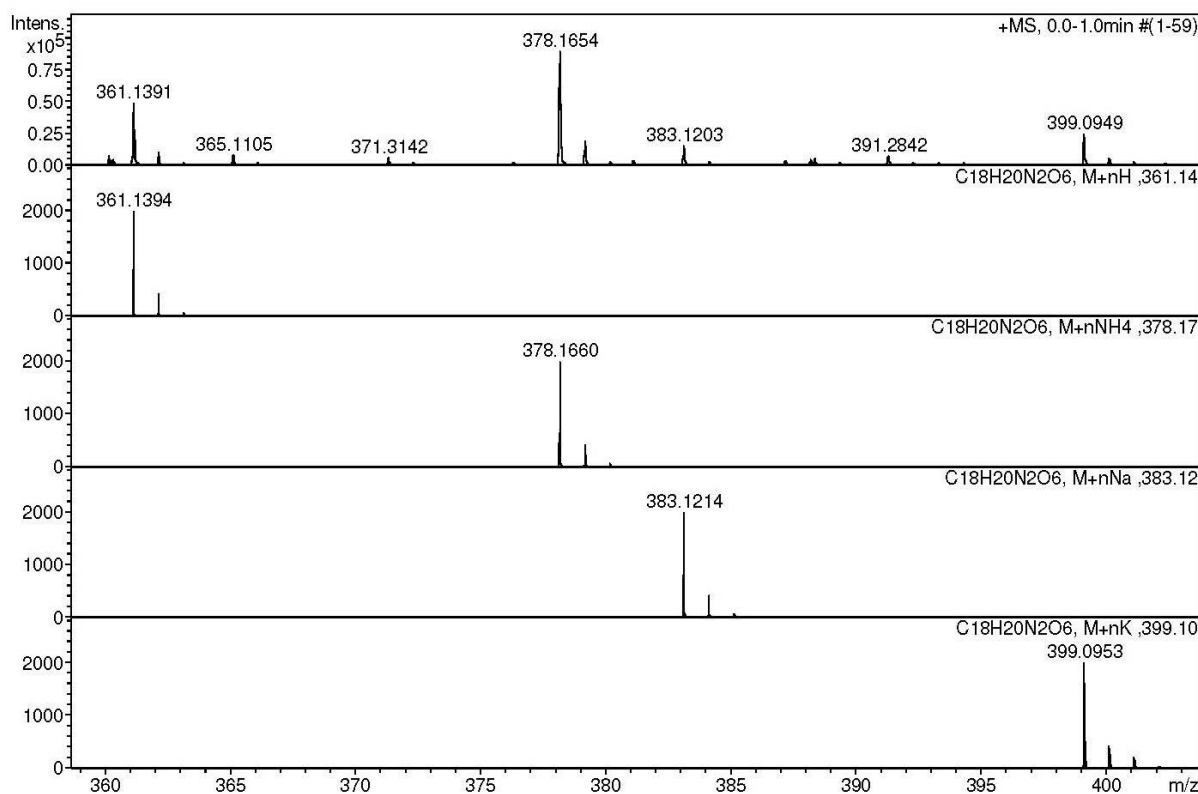

# Display Report

## Analysis Info

Analysis Name D:\Data\Chizhov\Terentiev\Budnikov\sm-169\_&clblow.d  
Method tune\_low.m  
Sample Name /TERN SM-169  
Comment CH3CN 100 %, dil. 200, calibrant added

Acquisition Date 20.07.2023 12:41:45  
Operator BDAL@DE  
Instrument / Ser# micrOTOF 10248

## Acquisition Parameter

|             |            |                      |          |                  |           |
|-------------|------------|----------------------|----------|------------------|-----------|
| Source Type | ESI        | Ion Polarity         | Positive | Set Nebulizer    | 0.4 Bar   |
| Focus       | Not active |                      |          | Set Dry Heater   | 180 °C    |
| Scan Begin  | 50 m/z     | Set Capillary        | 4500 V   | Set Dry Gas      | 4.0 l/min |
| Scan End    | 2000 m/z   | Set End Plate Offset | -500 V   | Set Divert Valve | Waste     |

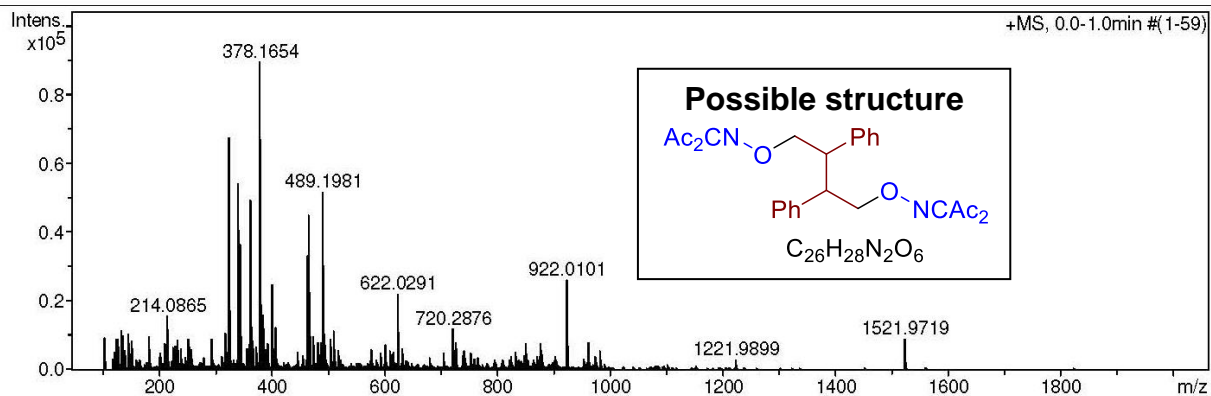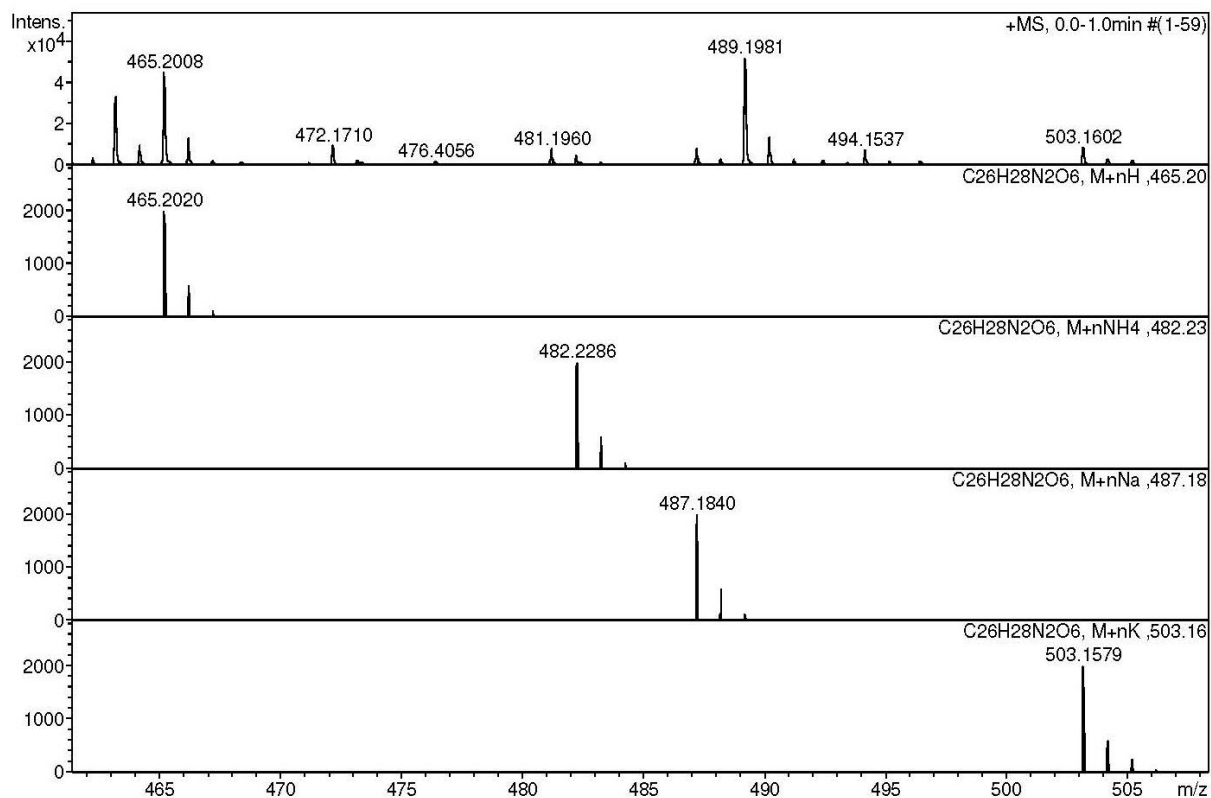

# Display Report

## Analysis Info

Analysis Name D:\Data\Chizhov\Terentiev\Budnikov\sm-169\_&clblow.d  
Method tune\_low.m  
Sample Name /TERN SM-169  
Comment CH3CN 100 %, dil. 200, calibrant added

Acquisition Date 20.07.2023 12:41:45

Operator BDAL@DE  
Instrument / Ser# microTOF 10248

## Acquisition Parameter

|             |            |                      |          |                  |           |
|-------------|------------|----------------------|----------|------------------|-----------|
| Source Type | ESI        | Ion Polarity         | Positive | Set Nebulizer    | 0.4 Bar   |
| Focus       | Not active |                      |          | Set Dry Heater   | 180 °C    |
| Scan Begin  | 50 m/z     | Set Capillary        | 4500 V   | Set Dry Gas      | 4.0 l/min |
| Scan End    | 2000 m/z   | Set End Plate Offset | -500 V   | Set Divert Valve | Waste     |

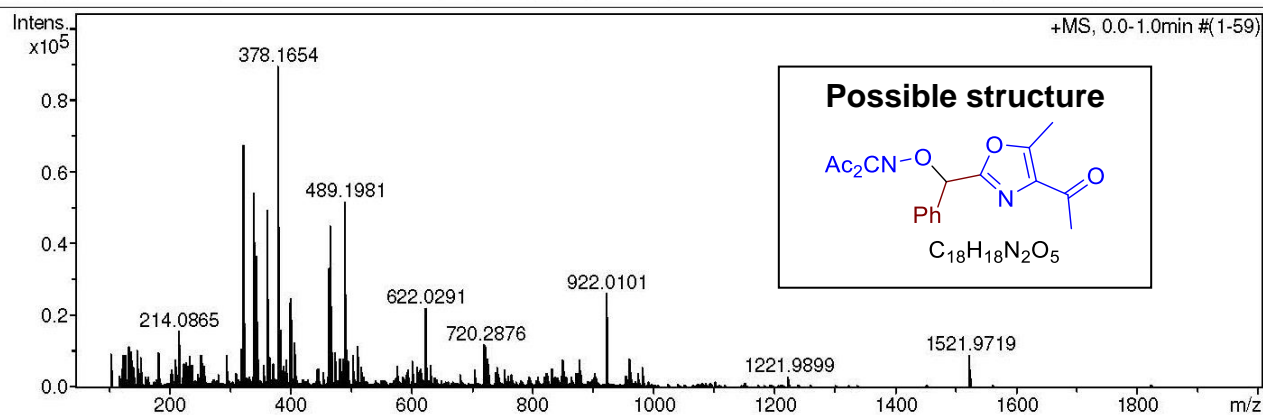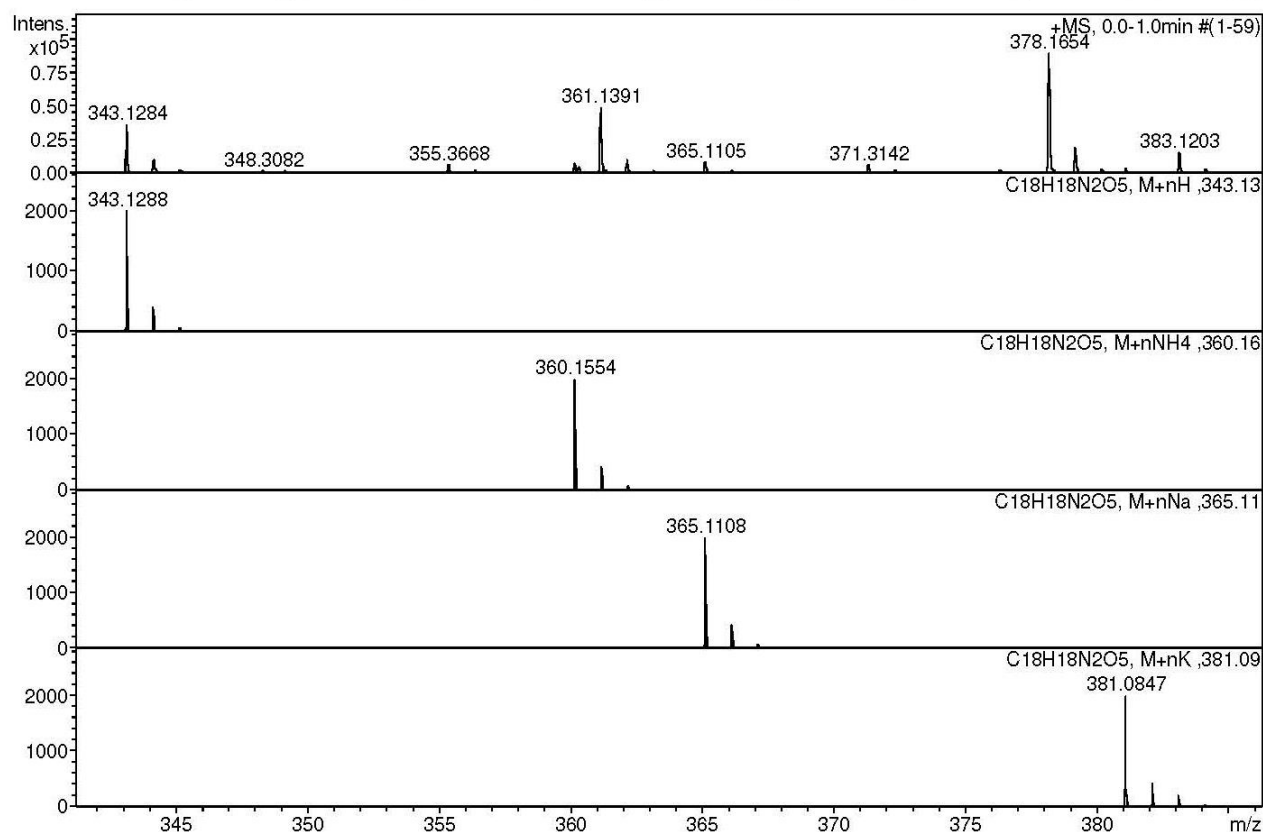



# Display Report

## Analysis Info

Analysis Name D:\Data\Chizhov\Terentiev\Budnikov\sm-169\_&clblow.d  
Method tune\_low.m  
Sample Name /TERN SM-169  
Comment CH3CN 100 %, dil. 200, calibrant added

Acquisition Date 20.07.2023 12:41:45  
Operator BDAL@DE  
Instrument / Ser# micrOTOF 10248

## Acquisition Parameter

|             |            |                      |          |                  |           |
|-------------|------------|----------------------|----------|------------------|-----------|
| Source Type | ESI        | Ion Polarity         | Positive | Set Nebulizer    | 0.4 Bar   |
| Focus       | Not active |                      |          | Set Dry Heater   | 180 °C    |
| Scan Begin  | 50 m/z     | Set Capillary        | 4500 V   | Set Dry Gas      | 4.0 l/min |
| Scan End    | 2000 m/z   | Set End Plate Offset | -500 V   | Set Divert Valve | Waste     |

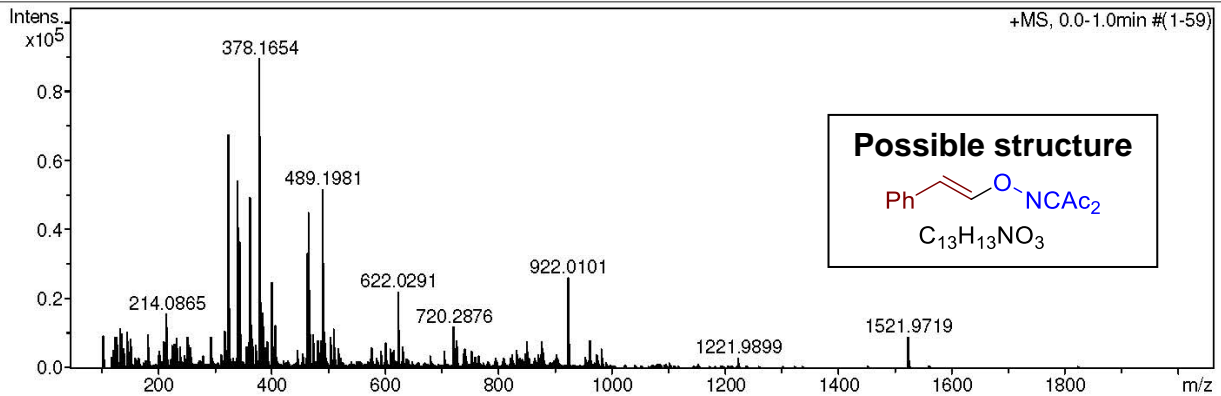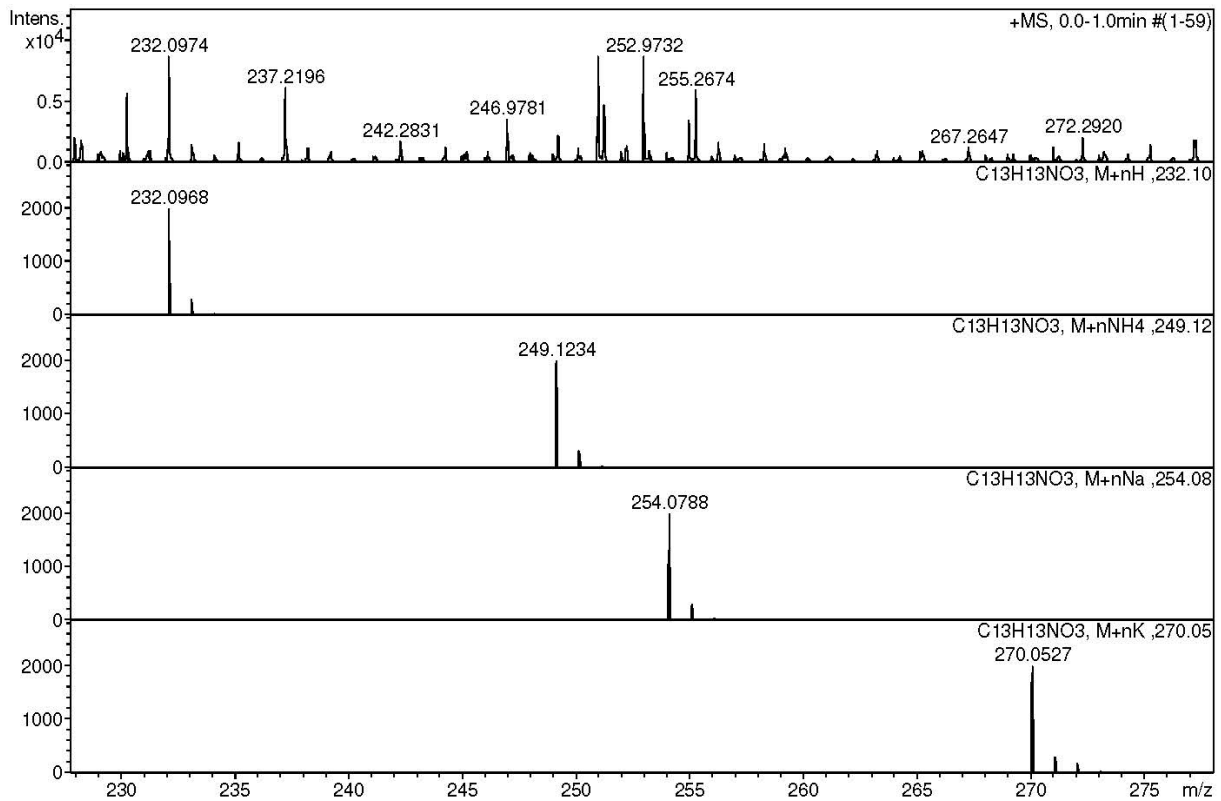

*Reaction with cyclopentene 4a*: the solution of the diacetylinoxyl radical **2** (10 mmol in 125 mL CH<sub>2</sub>Cl<sub>2</sub>) was placed in a two-necked flask. Then cyclopentene **4a** (5 mmol, 340 mg) in CH<sub>2</sub>Cl<sub>2</sub> (2 mL) was added and the reaction mixture was stirred for 24 hours at room temperature under an argon atmosphere. 1,1,2,2-Tetrachloroethane was added as an internal standard, and then the crude reaction mixture was analyzed using <sup>1</sup>H NMR spectroscopy. The reaction mixture was rotary evaporated under a water-jet vacuum and analyzed employing HRMS and GC-MS.

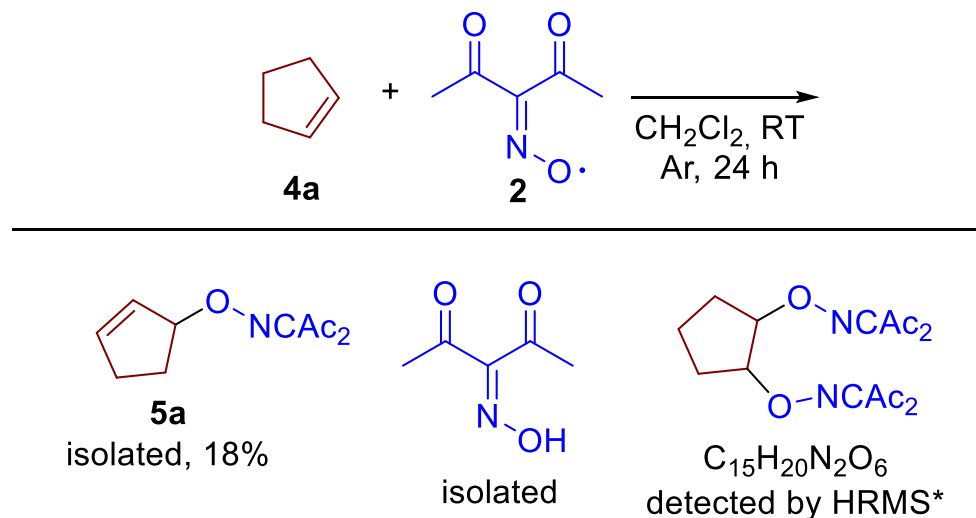

**\*Possible structure proposed based on  
HRMS and GC-MS data**

7.26  
5.28  
5.27  
2.66  
2.64  
2.58  
2.52  
2.52  
2.51  
2.50  
2.49  
2.48  
2.47  
2.47  
2.46  
2.44  
2.43  
2.42  
2.41  
2.40  
2.39  
2.34  
2.33  
2.32  
2.31  
2.31  
2.30  
2.29  
2.29  
2.28  
2.27  
2.27  
2.26  
2.26  
2.25  
2.24  
2.23  
2.23  
2.22  
2.21  
2.20  
2.19  
2.19  
2.19  
2.16  
2.06  
2.04  
1.66

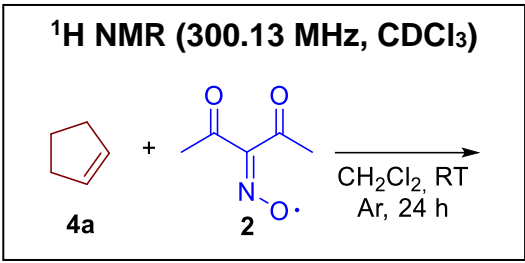

|    |                        |                   |
|----|------------------------|-------------------|
| 1  | Title                  | BUD986-{1H}.2.fid |
| 2  | Solvent                | CDCl3             |
| 3  | Temperature            | 298.0             |
| 4  | Pulse Sequence         | zgpr30            |
| 5  | Number of Scans        | 16                |
| 6  | Receiver Gain          | 101.0             |
| 7  | Relaxation Delay       | 2.0000            |
| 8  | Pulse Width            | 14.7000           |
| 9  | Acquisition Time       | 2.4869            |
| 10 | Spectrometer Frequency | 300.23            |
| 11 | Spectral Width         | 5882.4            |
| 12 | Lowest Frequency       | -2236.1           |
| 13 | Nucleus                | 1H                |
| 14 | Acquired Size          | 14629             |
| 15 | Spectral Size          | 65536             |

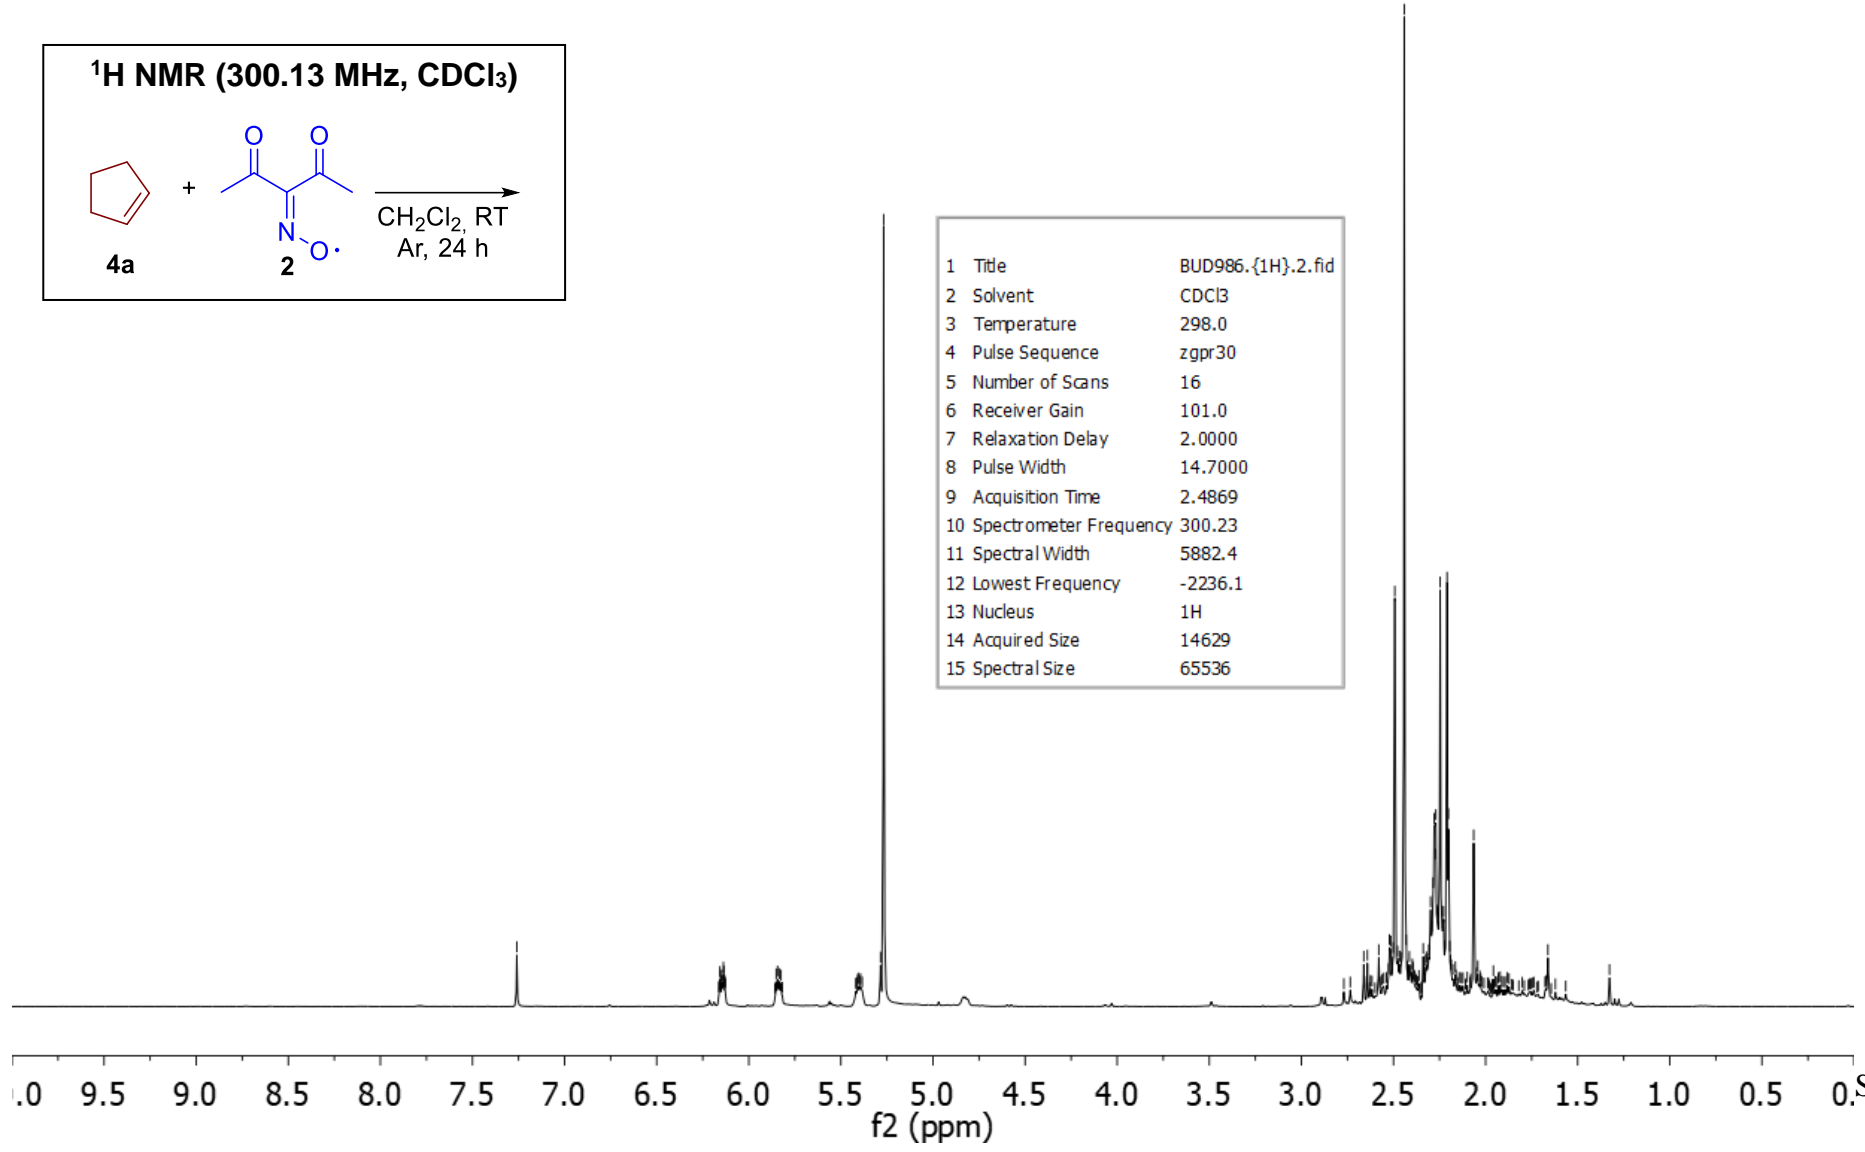

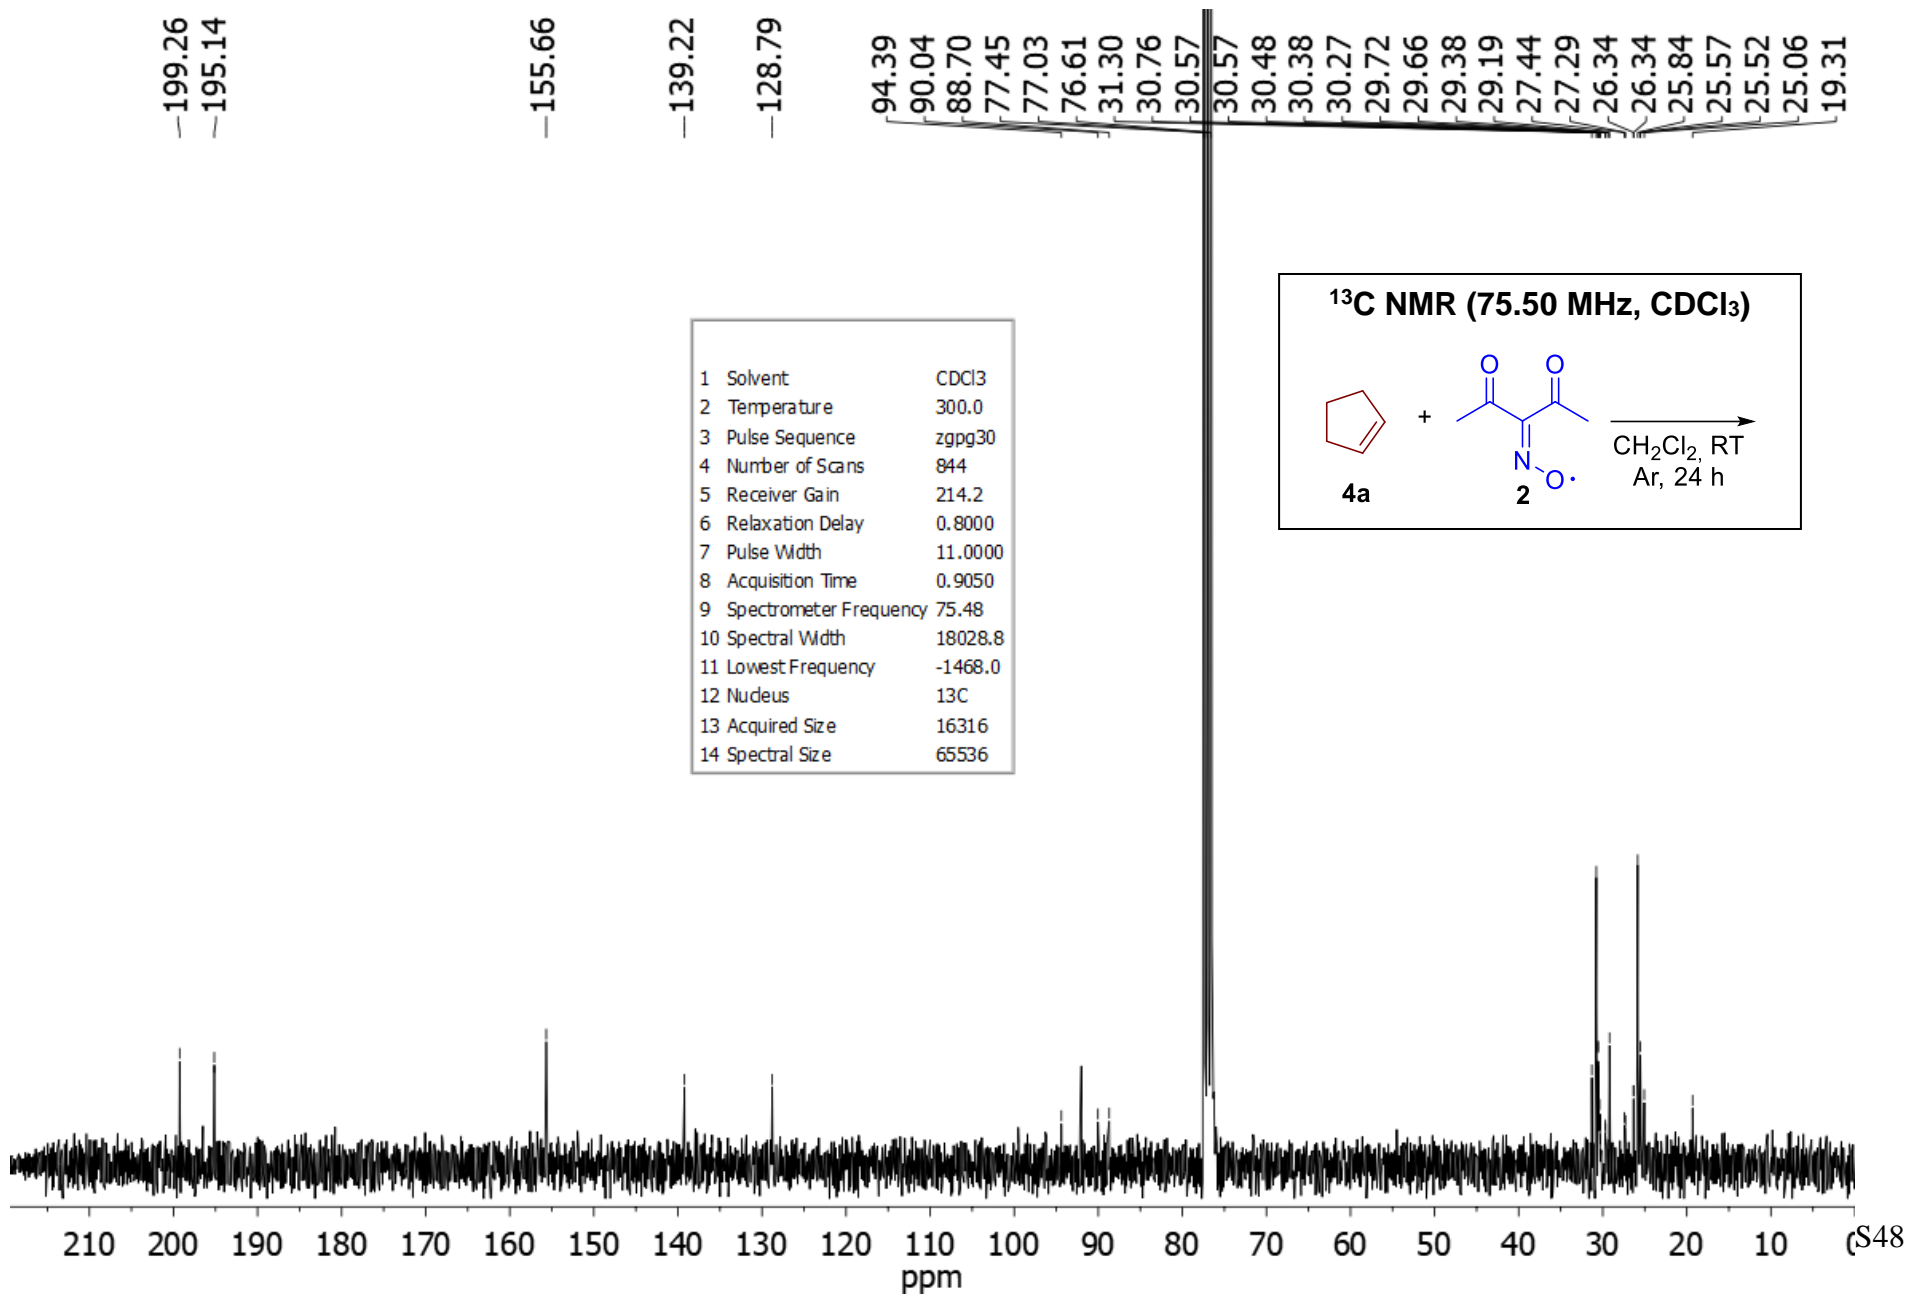

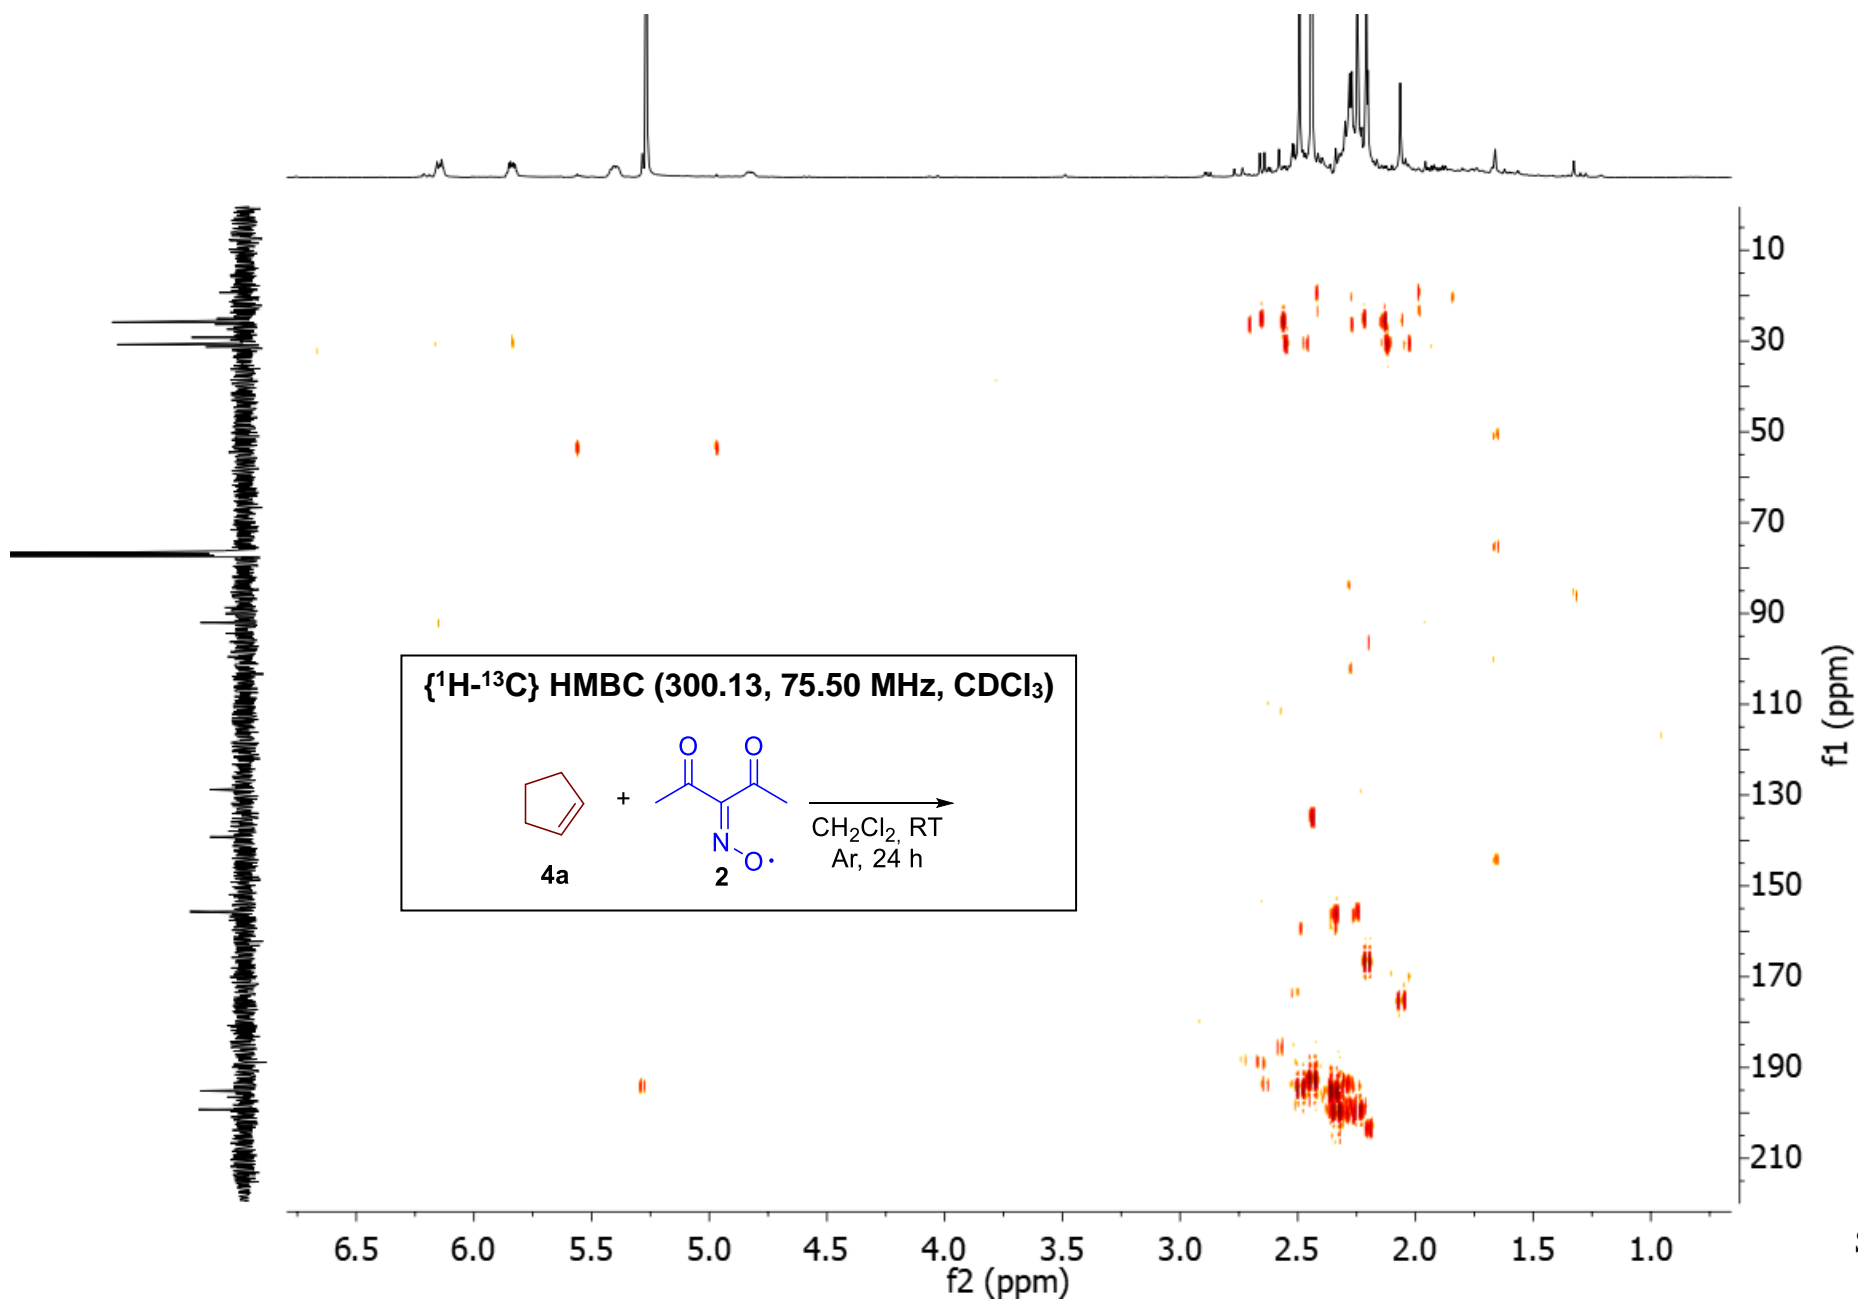

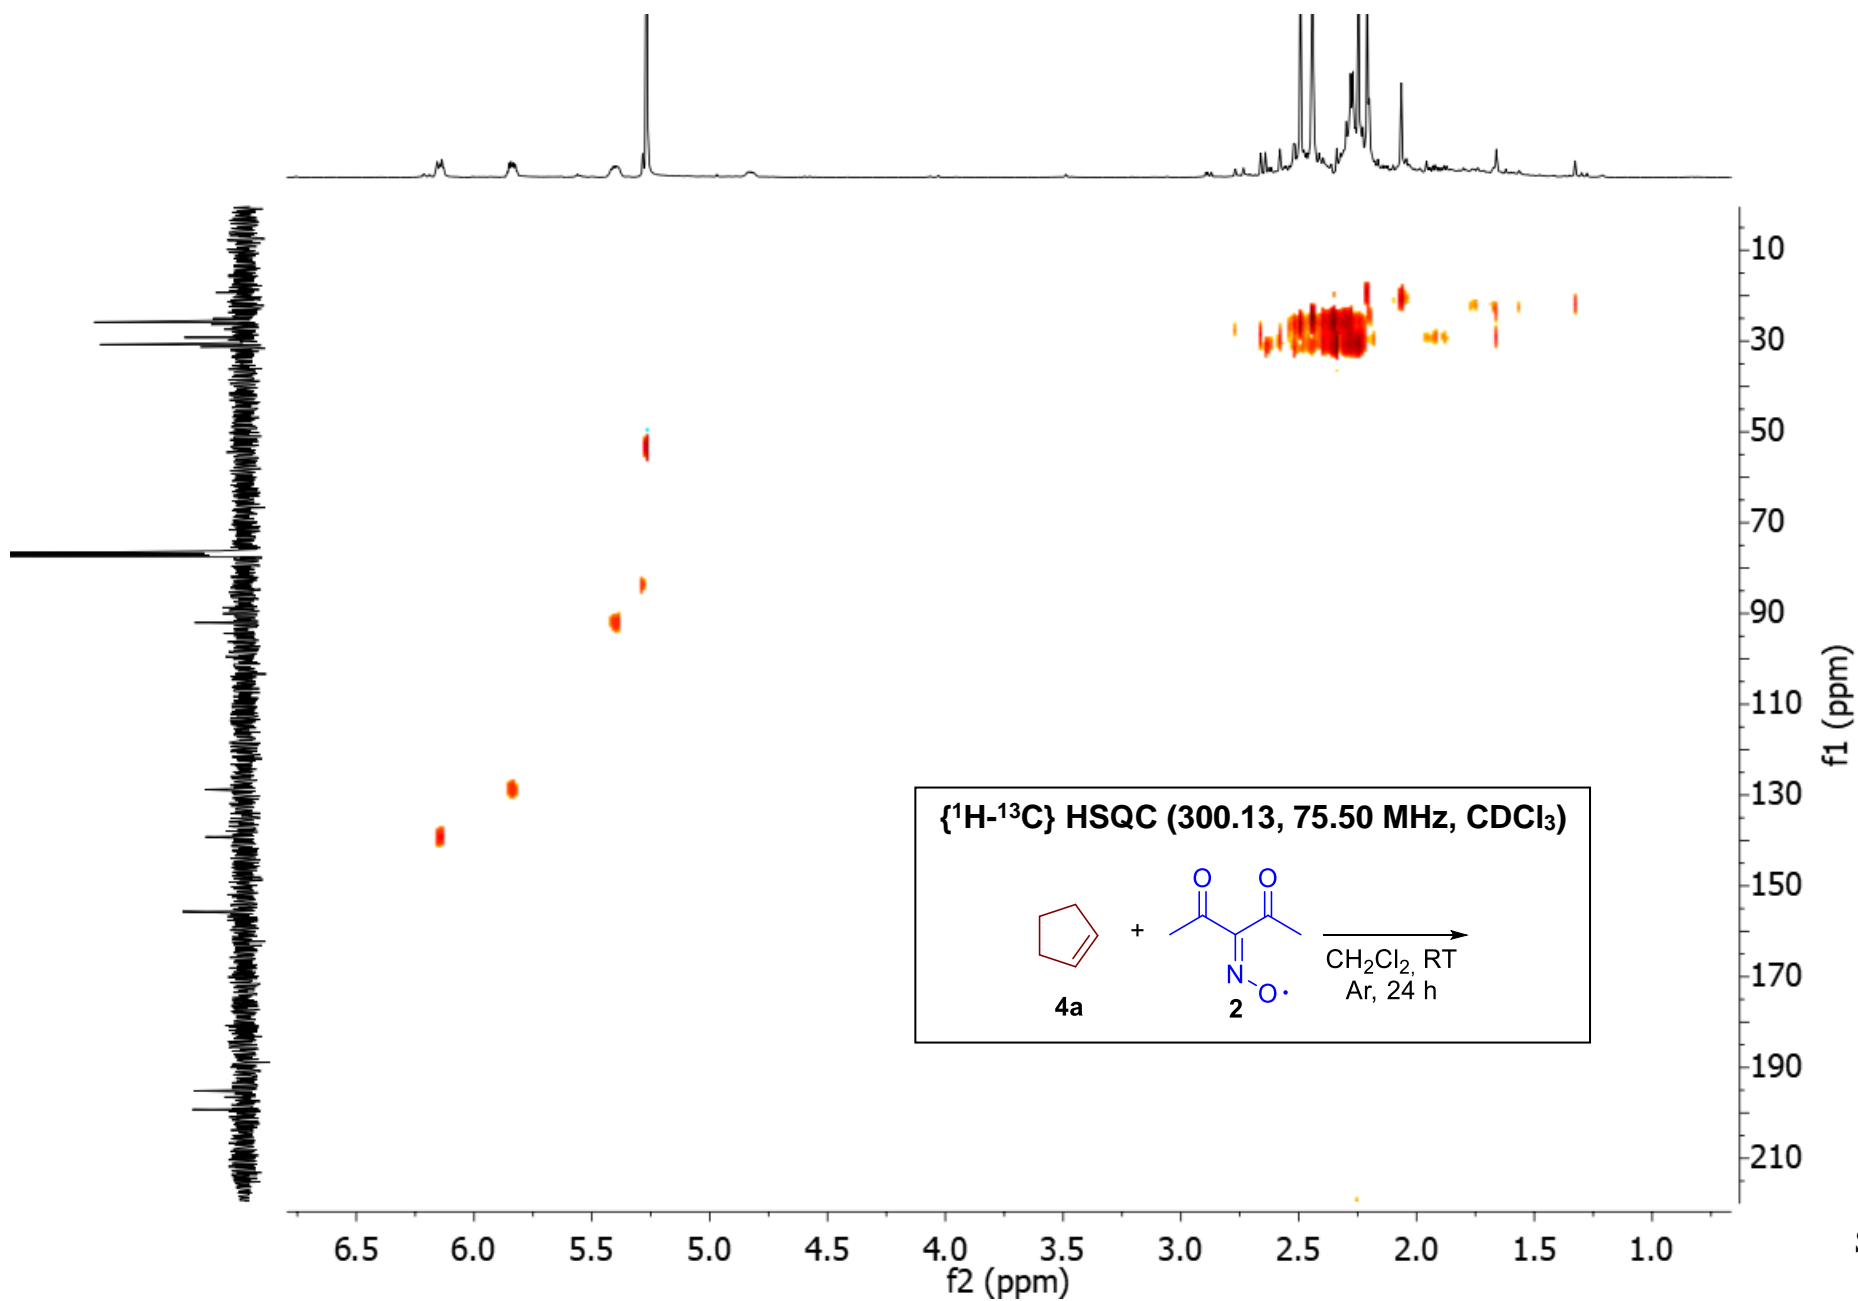

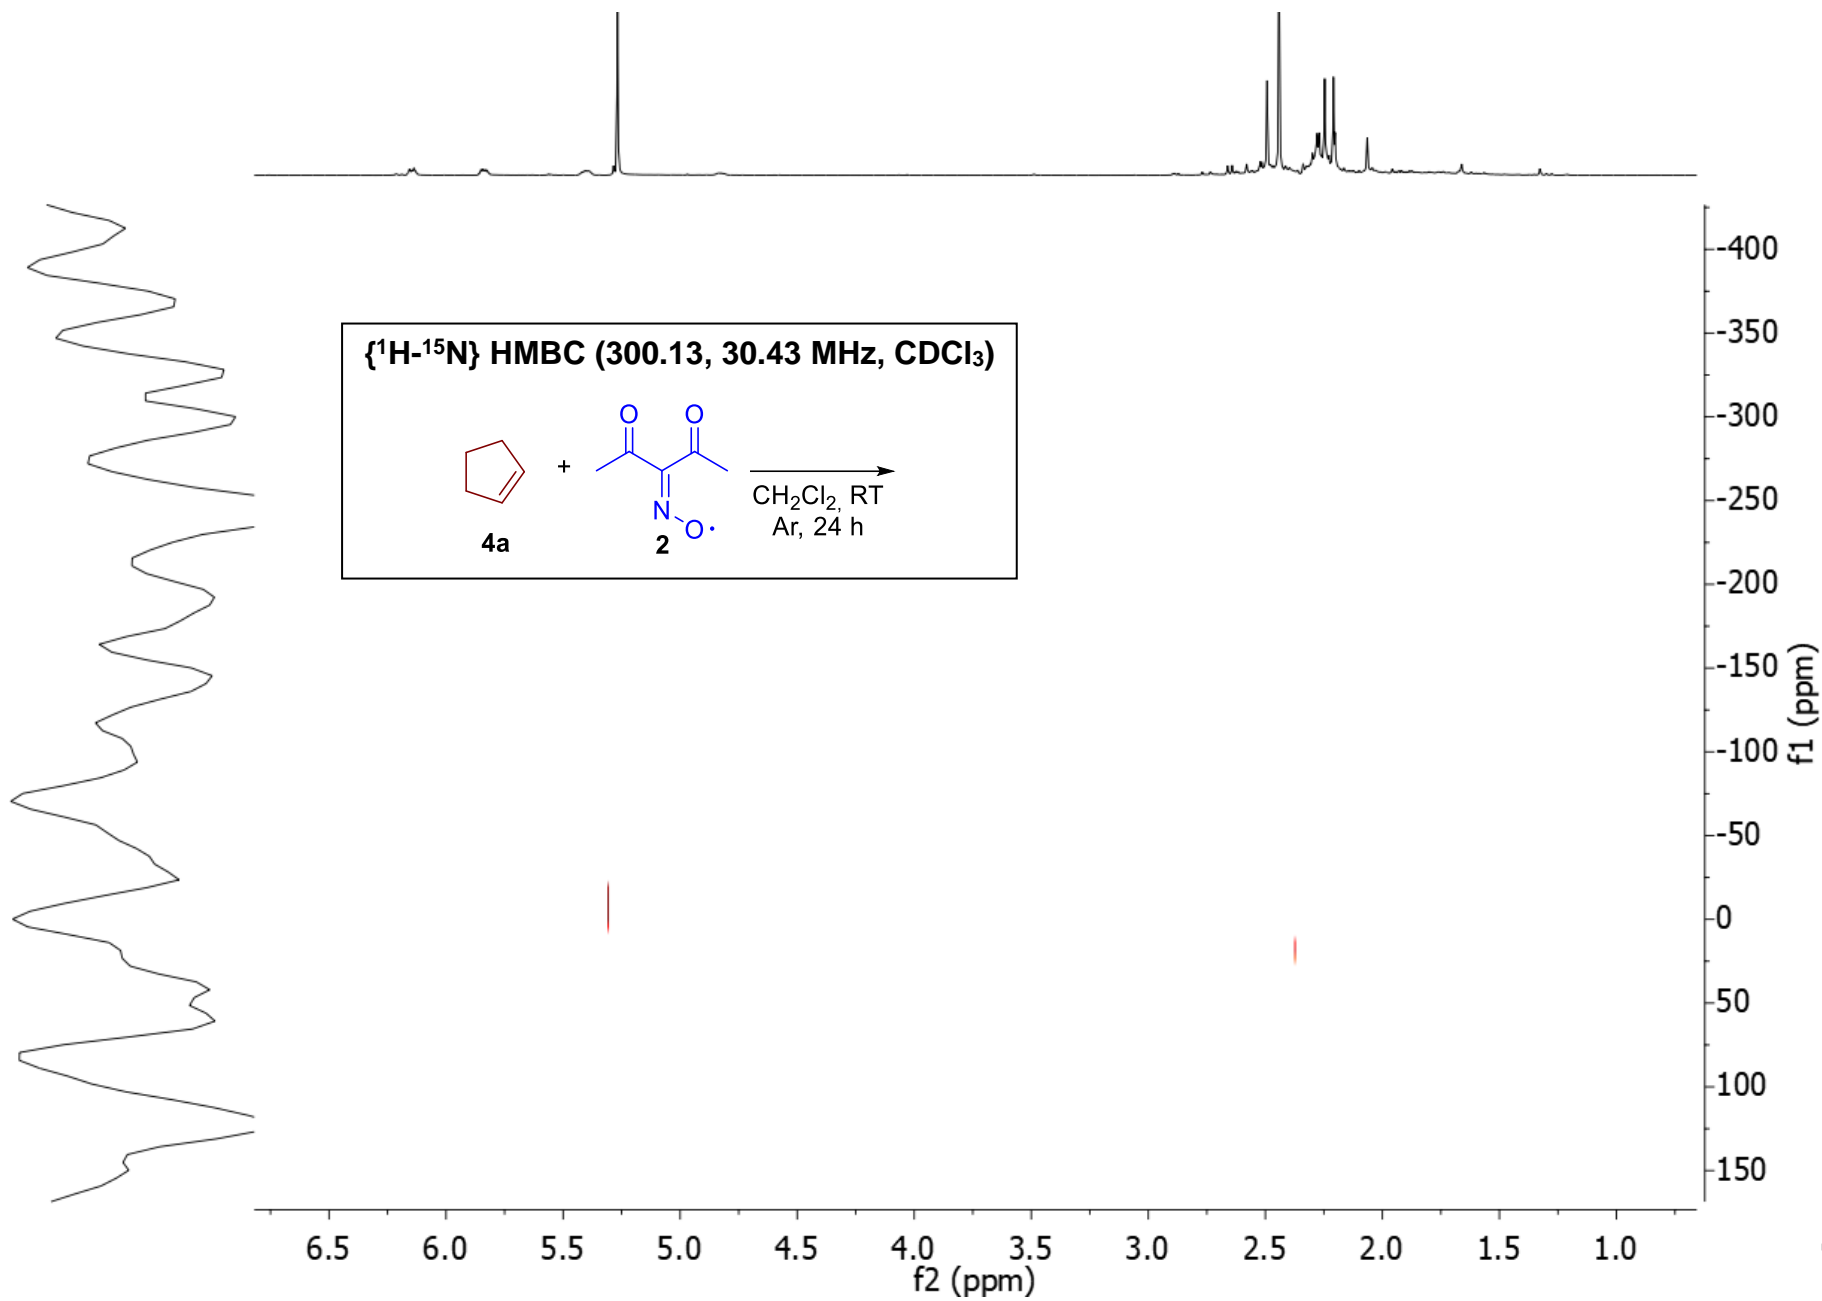

# GC-MS analysis of crude reaction mixture

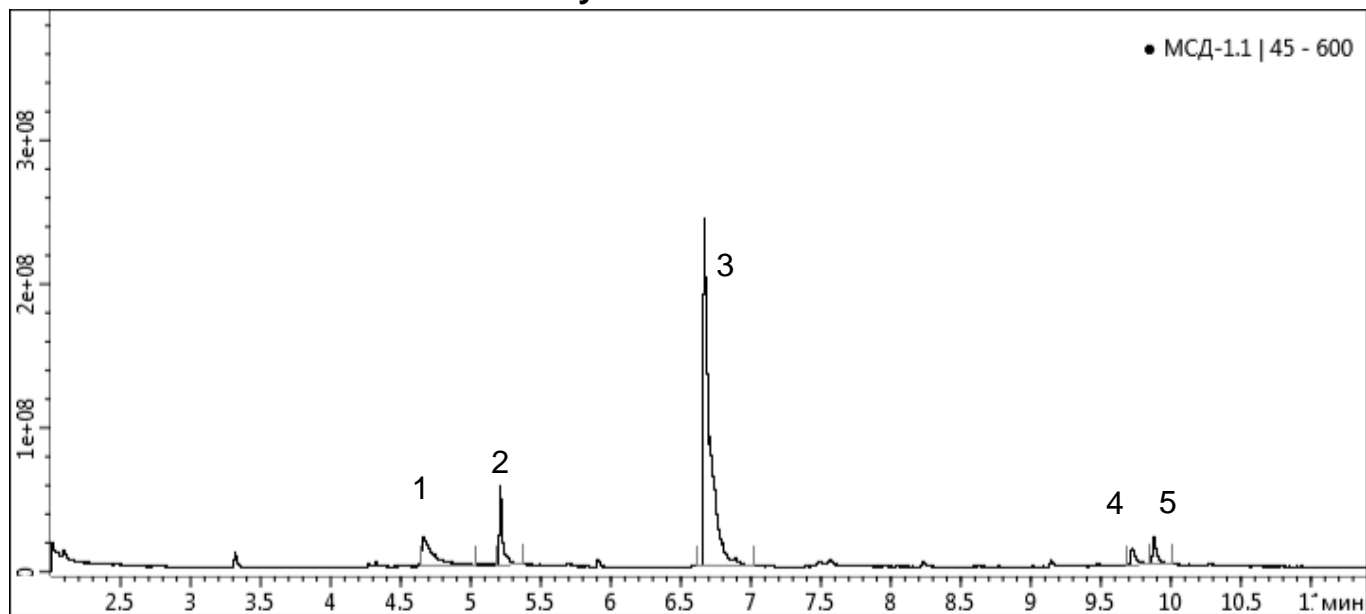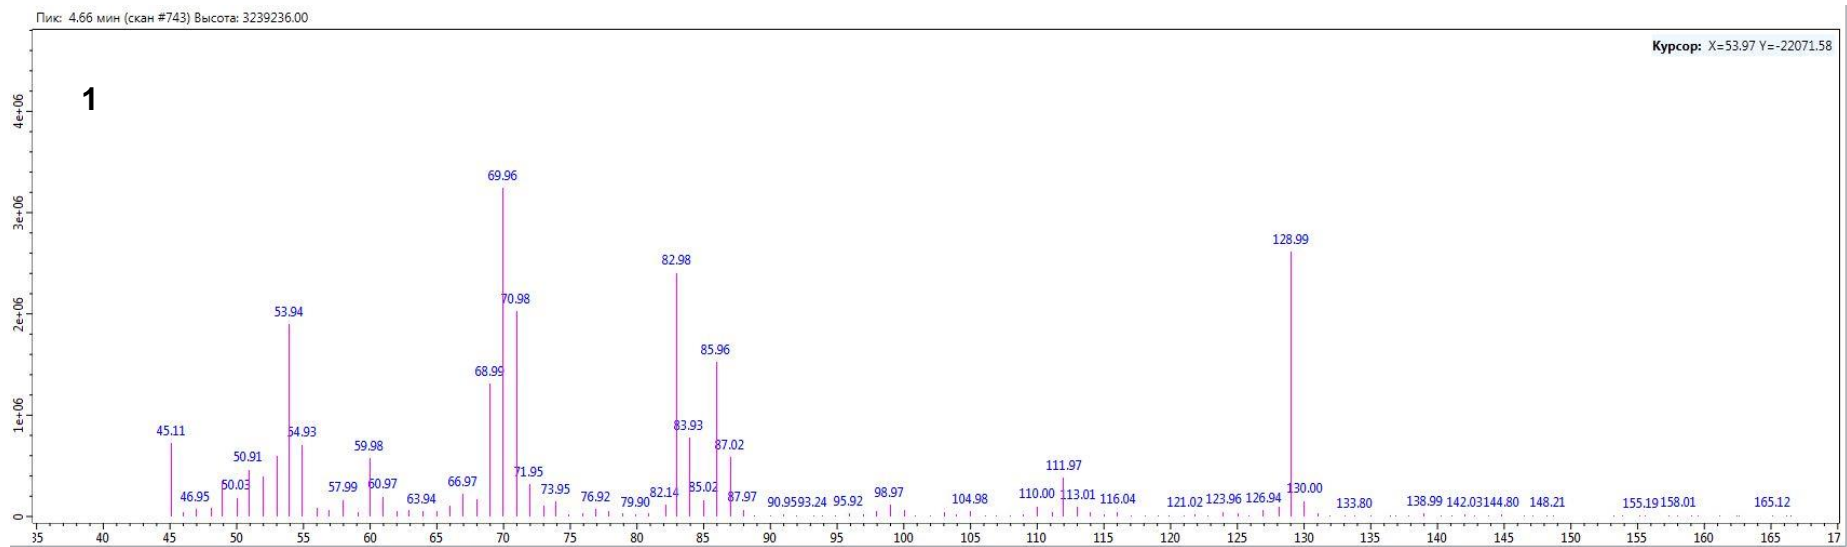



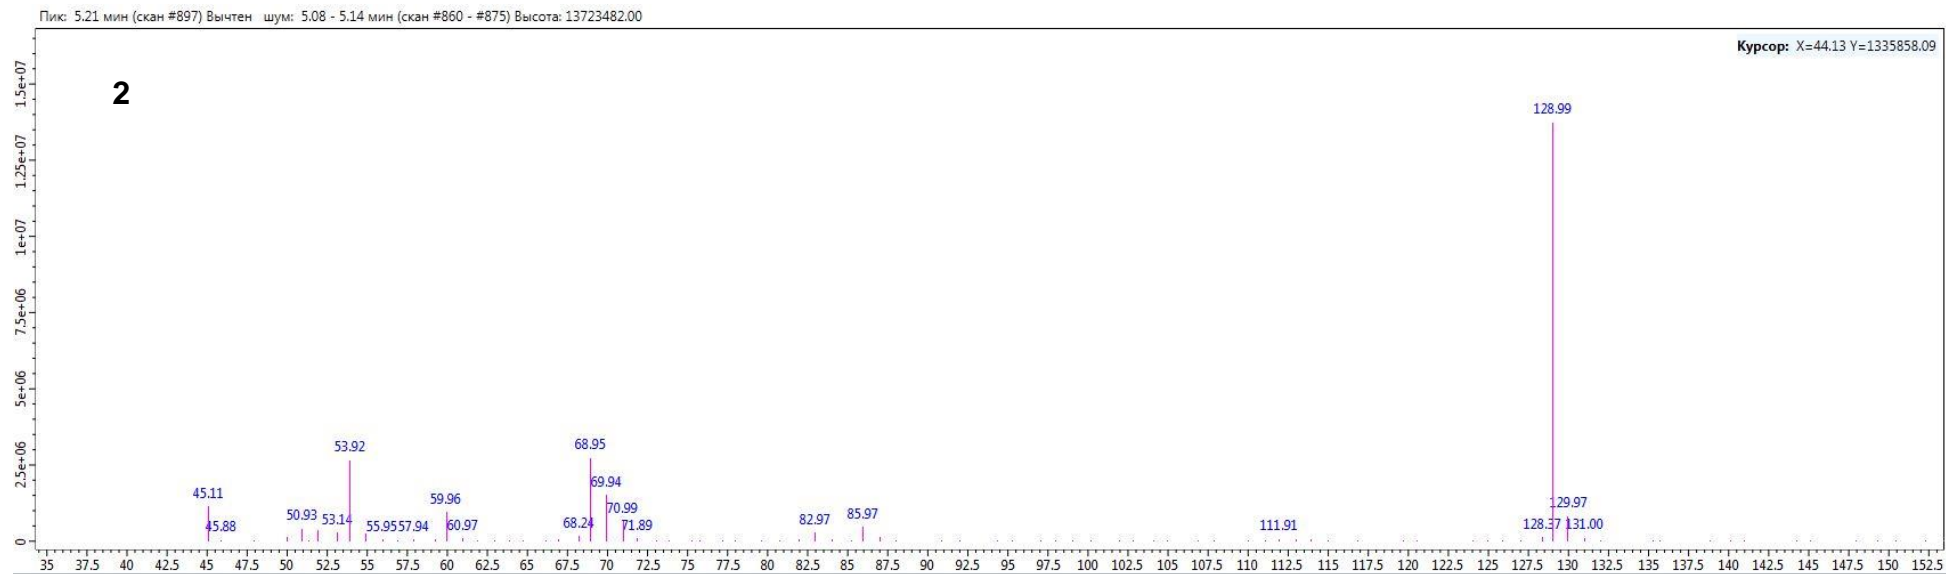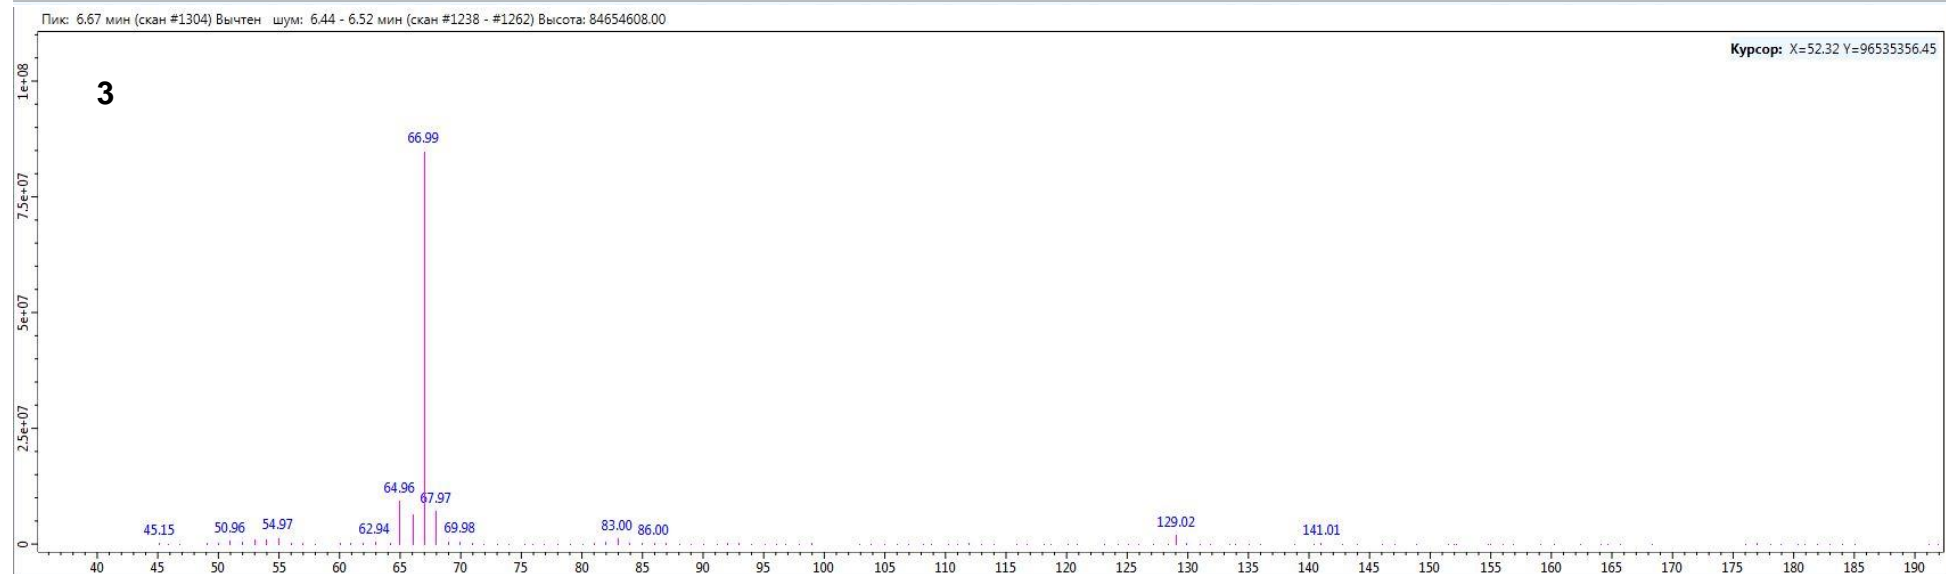

Пик: 9.72 мин (скан #2155) Вычтен шум: 9.37 - 9.56 мин (скан #2058 - #2111) Высота: 1153361.88

Курсор: X=216.37 Y=-18736.74

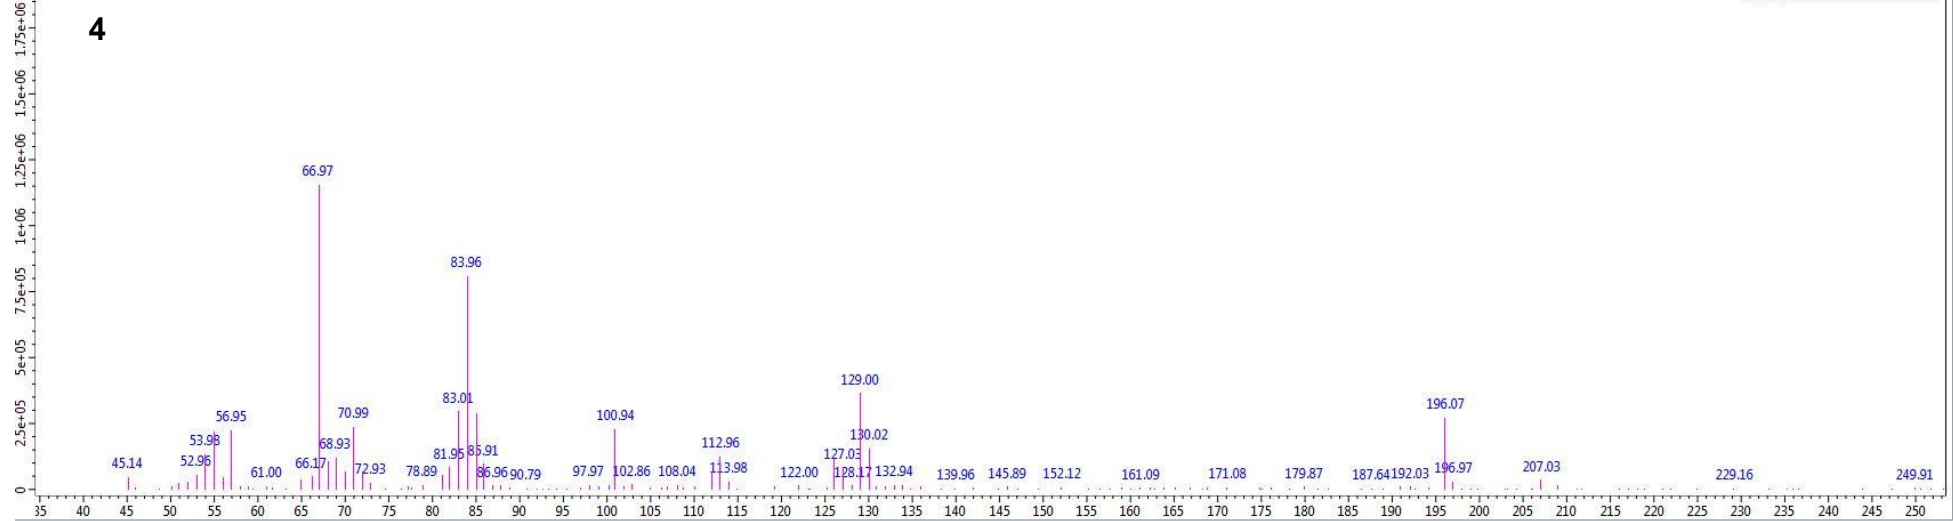

Пик: 9.88 мин (скан #2200) Вычтен шум: 9.51 - 9.65 мин (скан #2095 - #2135) Высота: 461305.25

Курсор: X=102.58 Y=39683.95

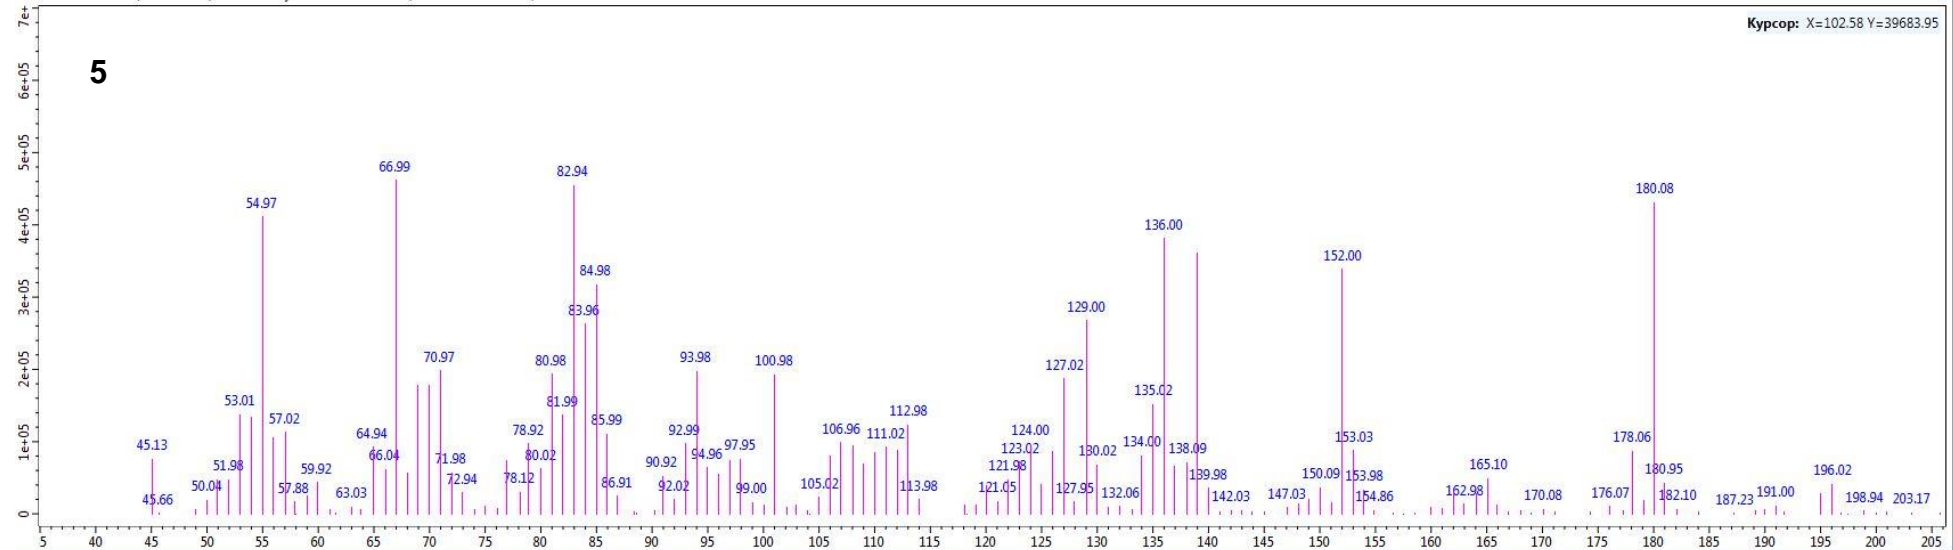

# HRMS analysis of crude reaction mixture

## Display Report

### Analysis Info

Analysis Name D:\Data\Chizhov\Terentiev\Budnikov\sm-170\_&clblow.d  
 Method tune\_low.m  
 Sample Name /TERN SM-170  
 Comment CH3CN 100 %, dil 200, calibrant added

Acquisition Date 24.07.2023 11:58:31  
 Operator BDAL@DE  
 Instrument / Ser# micrOTOF 10248

### Acquisition Parameter

|             |            |                      |          |                  |           |
|-------------|------------|----------------------|----------|------------------|-----------|
| Source Type | ESI        | Ion Polarity         | Positive | Set Nebulizer    | 0.4 Bar   |
| Focus       | Not active |                      |          | Set Dry Heater   | 180 °C    |
| Scan Begin  | 50 m/z     | Set Capillary        | 4500 V   | Set Dry Gas      | 4.0 l/min |
| Scan End    | 2000 m/z   | Set End Plate Offset | -500 V   | Set Divert Valve | Waste     |

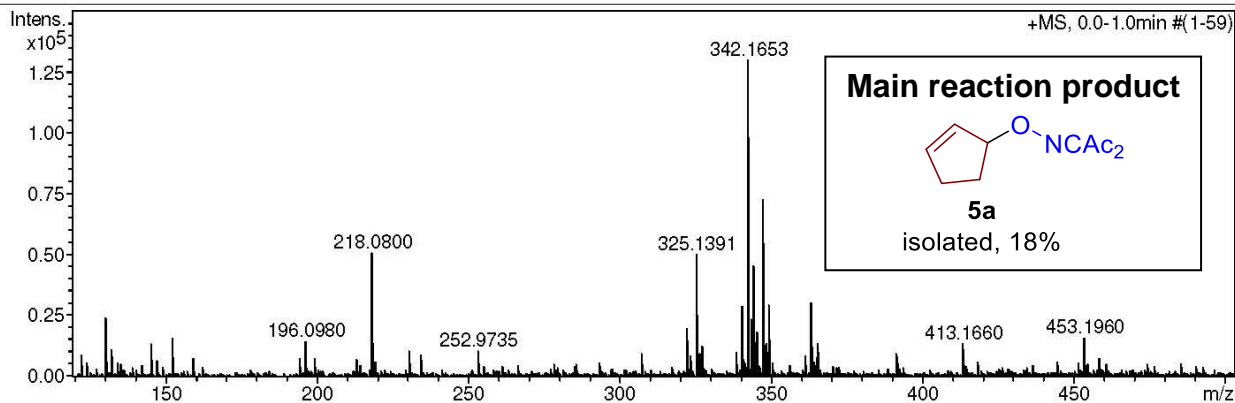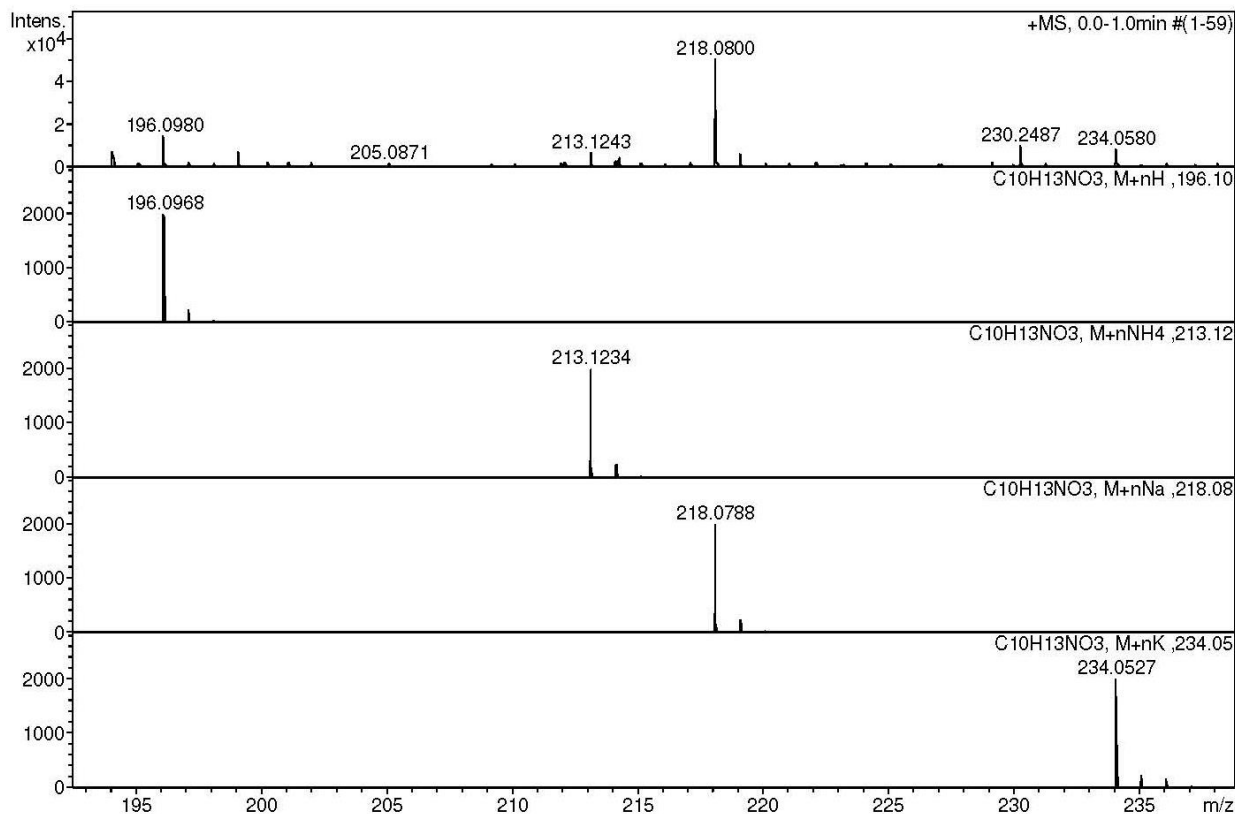

# Display Report

## Analysis Info

Analysis Name D:\Data\Chizhov\Terentiev\Budnikov\sm-170\_&clblow.d  
Method tune\_low.m  
Sample Name /TERN SM-170  
Comment CH3CN 100 %, dil 200, calibrant added

Acquisition Date 24.07.2023 11:58:31  
Operator BDAL@DE  
Instrument / Ser# micrOTOF 10248

## Acquisition Parameter

|             |            |                      |          |                  |           |
|-------------|------------|----------------------|----------|------------------|-----------|
| Source Type | ESI        | Ion Polarity         | Positive | Set Nebulizer    | 0.4 Bar   |
| Focus       | Not active |                      |          | Set Dry Heater   | 180 °C    |
| Scan Begin  | 50 m/z     | Set Capillary        | 4500 V   | Set Dry Gas      | 4.0 l/min |
| Scan End    | 2000 m/z   | Set End Plate Offset | -500 V   | Set Divert Valve | Waste     |

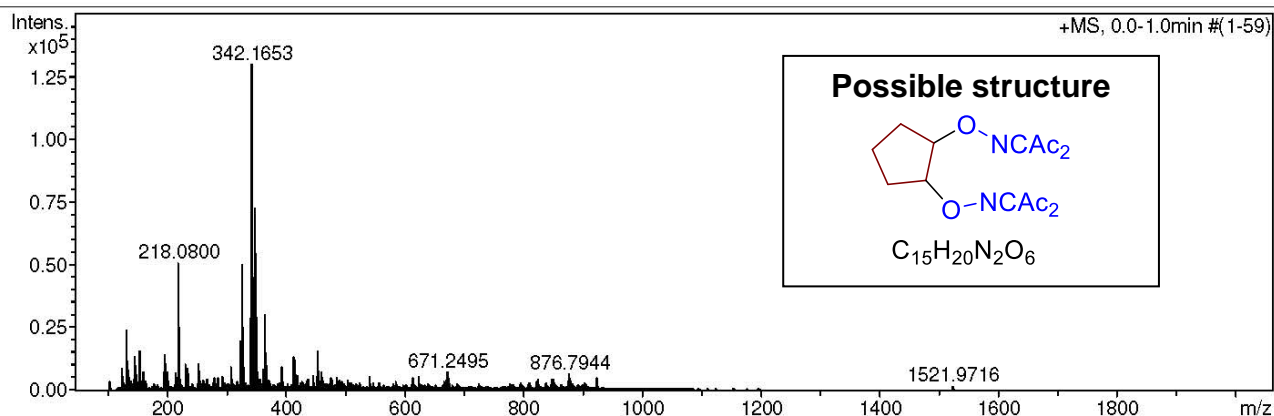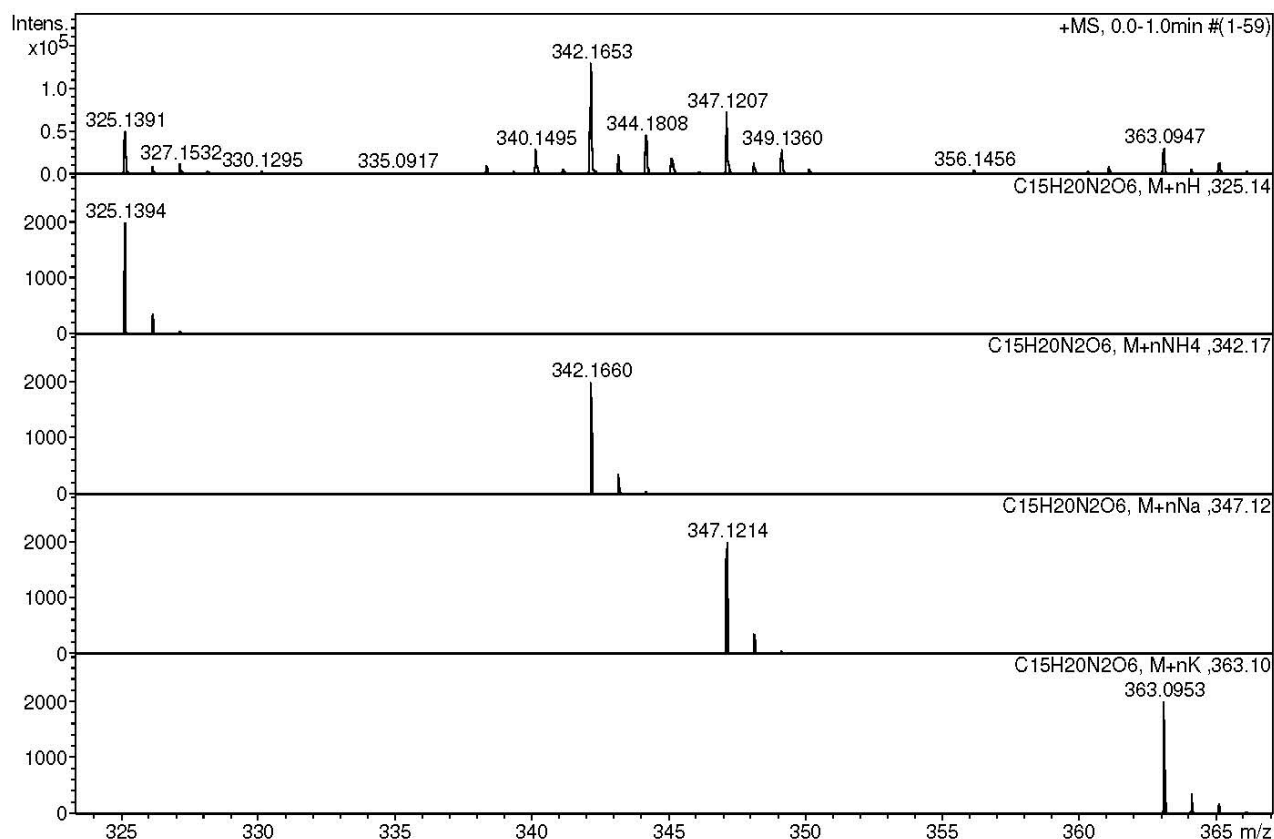

## X-ray single-crystal diffraction: Structure determination of compounds *anti-3g*, *3j'* and *3l*

X-ray diffraction data were collected at 100K on a Bruker Quest D8 diffractometer equipped with a Photon-III area-detector (graphite monochromator, shutterless  $\varphi$ - and  $\omega$ -scan technique), using Mo  $K_{\alpha}$ -radiation (0.71073 Å). The intensity data were integrated by the SAINT program<sup>5</sup> and corrected for absorption and decay using SADABS.<sup>6</sup> The structure was solved by direct methods using SHELXT<sup>7</sup> and refined on  $F^2$  using SHELXL-2018.<sup>8</sup> All non-hydrogen atoms were refined with anisotropic displacement parameters. Hydrogen atoms were placed in ideal calculated positions and refined as riding atoms with relative isotropic displacement parameters. The SHELXTL program suite<sup>5</sup> was used for molecular graphics. Crystal data and structure refinement for *anti-3g*, *3j'* and *3l* are summarized in Table S1–S3.

Compound *anti-3g* crystallizes in monoclinic space group  $P2_1/c$  (Figure S1).

**Table S1.** Crystal data and structure refinement for *anti-3g*.

|                        |                                                |                               |
|------------------------|------------------------------------------------|-------------------------------|
| Identification code    | B.699-1                                        |                               |
| Empirical formula      | $C_{24}H_{24}N_2O_6$                           |                               |
| Formula weight         | 436.45                                         |                               |
| Temperature            | 100.0(1) K                                     |                               |
| Wavelength             | 1.54184 Å                                      |                               |
| Crystal system         | Monoclinic                                     |                               |
| Space group            | $P2_1/c$                                       |                               |
| Unit cell dimensions   | $a = 11.2566(2)$ Å                             | $\alpha = 90^\circ$ .         |
|                        | $b = 5.41860(10)$ Å                            | $\beta = 92.9970(10)^\circ$ . |
|                        | $c = 18.4668(3)$ Å                             | $\gamma = 90^\circ$ .         |
| Volume                 | $1124.84(3)$ Å <sup>3</sup>                    |                               |
| Z                      | 4                                              |                               |
| Density (calculated)   | $1.289$ g/cm <sup>3</sup>                      |                               |
| Absorption coefficient | $0.772$ mm <sup>-1</sup>                       |                               |
| F(000)                 | 460                                            |                               |
| Crystal size           | $0.16 \times 0.04 \times 0.02$ mm <sup>3</sup> |                               |

|                                   |                                             |  |
|-----------------------------------|---------------------------------------------|--|
| Theta range for data collection   | 3.932 to 79.466°.                           |  |
| Index ranges                      | -14<=h<=14, -6<=k<=4, -23<=l<=23            |  |
| Reflections collected             | 12674                                       |  |
| Independent reflections           | 2420 [R(int) = 0.0356]                      |  |
| Completeness to theta = 67.684°   | 100.0 %                                     |  |
| Absorption correction             | Semi-empirical from equivalents             |  |
| Max. and min. transmission        | 1.00000 and 0.75658                         |  |
| Refinement method                 | Full-matrix least-squares on F <sup>2</sup> |  |
| Data / restraints / parameters    | 2420 / 0 / 148                              |  |
| Goodness-of-fit on F <sup>2</sup> | 1.100                                       |  |
| Final R indices [I>2sigma(I)]     | R1 = 0.0441, wR2 = 0.1203                   |  |
| R indices (all data)              | R1 = 0.0466, wR2 = 0.1223                   |  |
| Extinction coefficient            | 0.0045(8)                                   |  |

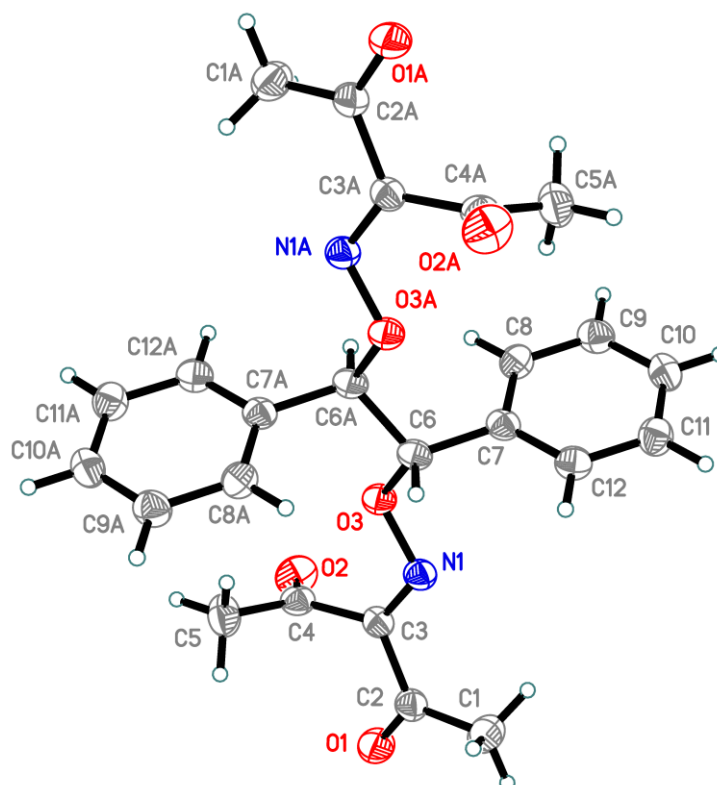

**Figure S1.** Crystal structure of compound **anti-3g**, showing the atomic numbering and 50% probability displacement ellipsoids

Crystal data and structure refinement for **3j'** are summarized in Table S2. Compound **3j'** crystallizes in monoclinic space group  $P 2_1/n$  (Figure S3).

**Table S2.** Crystal data and structure refinement for **3j'**.

|                      |                             |                              |
|----------------------|-----------------------------|------------------------------|
| Identification code  | LA-293                      |                              |
| Empirical formula    | $C_{24}H_{22}N_2O_5$        |                              |
| Formula weight       | 418.43                      |                              |
| Temperature          | 99.9(2) K                   |                              |
| Wavelength           | 1.54184 Å                   |                              |
| Crystal system       | Monoclinic                  |                              |
| Space group          | $P 2_1/n$                   |                              |
| Unit cell dimensions | $a = 11.6766(3)$ Å          | $\alpha = 90^\circ$ .        |
|                      | $b = 15.1780(4)$ Å          | $\beta = 104.950(2)^\circ$ . |
|                      | $c = 12.1389(3)$ Å          | $\gamma = 90^\circ$ .        |
| Volume               | $2078.53(9)$ Å <sup>3</sup> |                              |
| Z                    | 4                           |                              |

|                                   |                                             |  |
|-----------------------------------|---------------------------------------------|--|
| Density (calculated)              | 1.337 g/cm <sup>3</sup>                     |  |
| Absorption coefficient            | 0.777 mm <sup>-1</sup>                      |  |
| F(000)                            | 880                                         |  |
| Crystal size                      | 0.12 x 0.06 x 0.02 mm <sup>3</sup>          |  |
| Theta range for data collection   | 4.686 to 77.826°.                           |  |
| Index ranges                      | -12<=h<=14, -19<=k<=17, -15<=l<=15          |  |
| Reflections collected             | 25662                                       |  |
| Independent reflections           | 4433 [R(int) = 0.1019]                      |  |
| Observed reflections              | 3958                                        |  |
| Completeness to theta = 67.684°   | 100.0 %                                     |  |
| Absorption correction             | Semi-empirical from equivalents             |  |
| Max. and min. transmission        | 1.00000 and 0.13417                         |  |
| Refinement method                 | Full-matrix least-squares on F <sup>2</sup> |  |
| Data / restraints / parameters    | 4433 / 23 / 333                             |  |
| Goodness-of-fit on F <sup>2</sup> | 1.044                                       |  |
| Final R indices [I>2sigma(I)]     | R1 = 0.0655, wR2 = 0.1740                   |  |
| R indices (all data)              | R1 = 0.0707, wR2 = 0.1776                   |  |
| Largest diff. peak and hole       | 0.343 and -0.330 e.Å <sup>-3</sup>          |  |



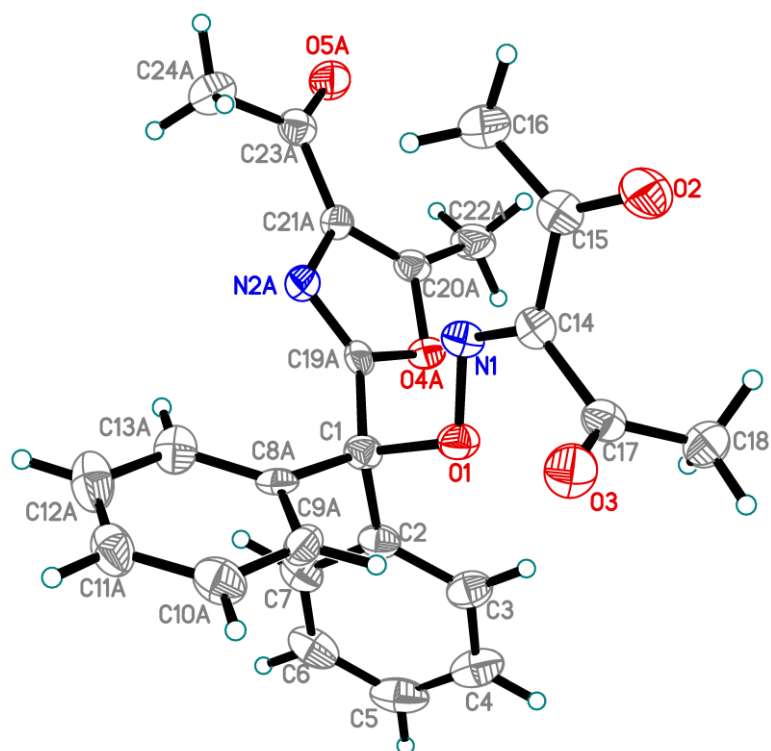

**Figure S2.** Crystal structure of compound **3j'**, showing two independent molecules, atomic numbering and 50% probability displacement ellipsoids.

Crystal data and structure refinement for **3l** are summarized in Table S3. Compound **3l** crystallizes in orthorhombic space group P-1 (Figure S3).

**Table S3.** Crystal data and structure refinement for **3l**.

|                      |                                                               |                   |
|----------------------|---------------------------------------------------------------|-------------------|
| Identification code  | LA88                                                          |                   |
| Empirical formula    | C <sub>44</sub> H <sub>46</sub> N <sub>2</sub> O <sub>8</sub> |                   |
| Formula weight       | 730.83                                                        |                   |
| Temperature          | 100(2) K                                                      |                   |
| Wavelength           | 0.71073 Å                                                     |                   |
| Crystal system       | Triclinic                                                     |                   |
| Space group          | P-1                                                           |                   |
| Unit cell dimensions | a = 8.9695(4) Å                                               | α = 62.1699(10)°. |
|                      | b = 10.9993(5) Å                                              | β = 79.6611(10)°. |
|                      | c = 11.5562(5) Å                                              | γ = 79.0306(10)°. |

|                                   |                                             |  |
|-----------------------------------|---------------------------------------------|--|
| Volume                            | 984.41(8) Å <sup>3</sup>                    |  |
| Z                                 | 1                                           |  |
| Density (calculated)              | 1.233 Mg/m <sup>3</sup>                     |  |
| Absorption coefficient            | 0.085 mm <sup>-1</sup>                      |  |
| F(000)                            | 388                                         |  |
| Crystal size                      | 0.48 x 0.42 x 0.38 mm <sup>3</sup>          |  |
| Theta range for data collection   | 2.813 to 29.996°.                           |  |
| Index ranges                      | -12<=h<=12, -15<=k<=15, -16<=l<=16          |  |
| Reflections collected             | 24408                                       |  |
| Independent reflections           | 5739 [R(int) = 0.0450]                      |  |
| Completeness to theta = 25.242°   | 99.9 %                                      |  |
| Absorption correction             | Semi-empirical from equivalents             |  |
| Max. and min. transmission        | 0.8751 and 0.8335                           |  |
| Refinement method                 | Full-matrix least-squares on F <sup>2</sup> |  |
| Data / restraints / parameters    | 5739 / 7 / 260                              |  |
| Goodness-of-fit on F <sup>2</sup> | 1.052                                       |  |
| Final R indices [I>2sigma(I)]     | R1 = 0.0474, wR2 = 0.1074                   |  |
| R indices (all data)              | R1 = 0.0653, wR2 = 0.1208                   |  |
| Extinction coefficient            | n/a                                         |  |

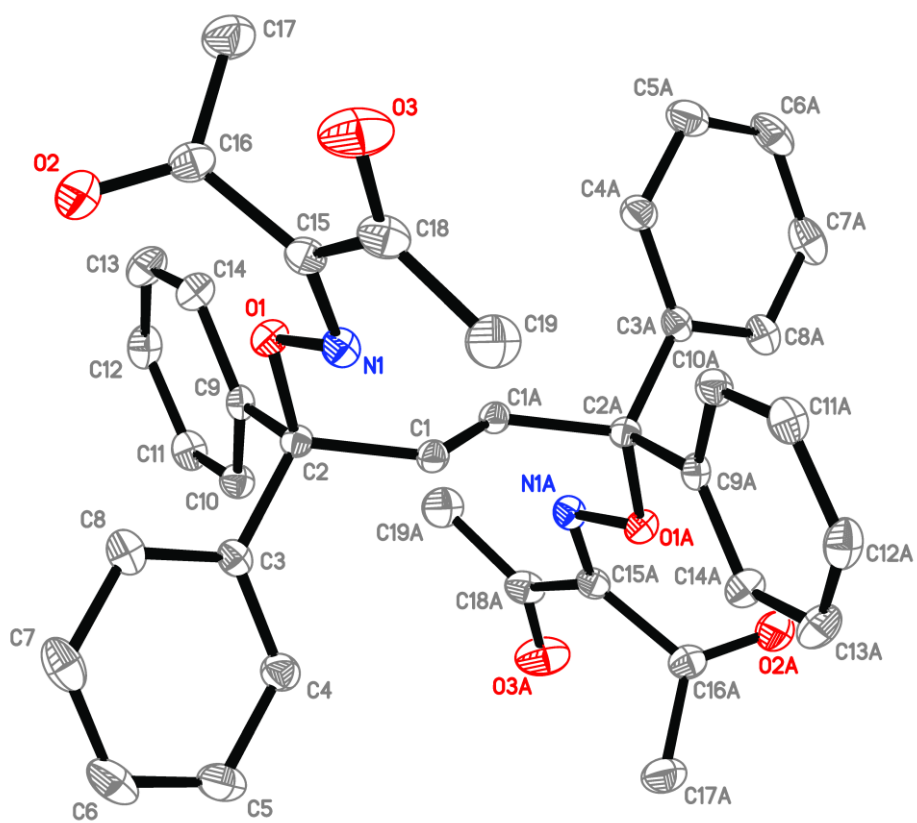

**Figure S3.** Crystal structure of compound **31**, showing two independent molecules, atomic numbering and 50% probability displacement ellipsoids.

## Computational details

All calculations were performed using Orca 5.04 software<sup>9</sup> for 218.15 K and 1 atm. pressure. DFT calculations were performed at  $\omega$ B97M-D4<sup>10-14</sup>/Def2-TZVPP<sup>15,16</sup>/CPCM(CH<sub>2</sub>Cl<sub>2</sub>) level. The resultant geometries were visualized by Avogadro<sup>17</sup> 1.2 program. Default integration grids were used for all DFT calculations. Schematic calculation summary and optimized geometries are given below.

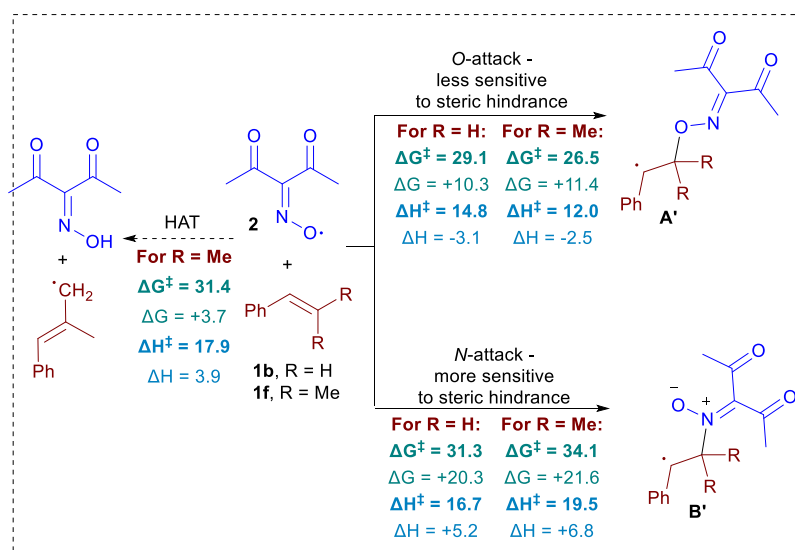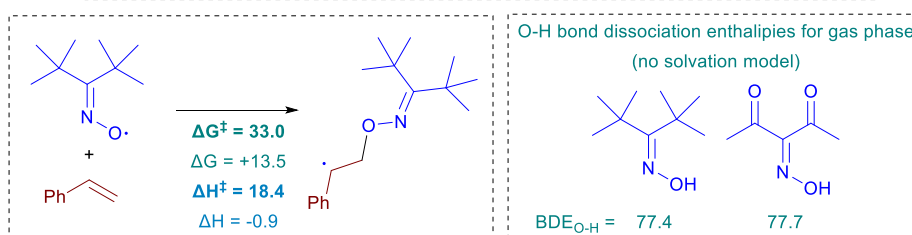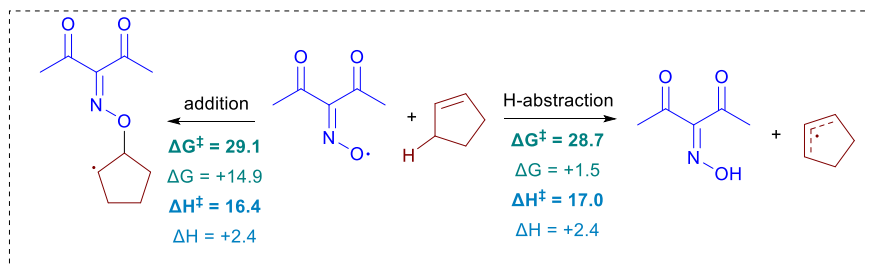

(Energies are given in kcal·mol<sup>-1</sup> according to  $\omega$ B97M-D4/Def2-TZVPP/PCM(CH<sub>2</sub>Cl<sub>2</sub>) calculation, unless otherwise noted)

### Styrene (1b)

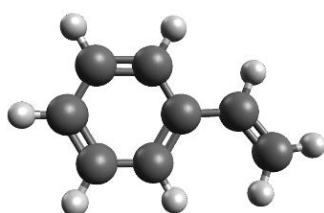

imaginary frequencies: no

Electronic energy ... -309.86030125 Eh

Enthalpy ... -309.71856849 Eh

Gibbs free energy ... -309.75773404 Eh

|   |                   |                   |                   |
|---|-------------------|-------------------|-------------------|
| C | 1.35064444930595  | 1.32285636676826  | -0.00909465416026 |
| C | -0.01326930397236 | 1.08374238149484  | -0.03007820802393 |
| C | -0.50829409550763 | -0.22214852839123 | -0.02198155917194 |
| C | 0.40425079540716  | -1.27598422148730 | -0.00032551208730 |
| C | 1.77180128034358  | -1.03898147069135 | 0.02094581599019  |
| C | 2.25020140184891  | 0.26265496750450  | 0.01786466846375  |
| H | 1.71550398358938  | 2.34049877744947  | -0.01614900906108 |
| H | -0.69550832202782 | 1.92137185176208  | -0.05709328124003 |
| H | 0.03435394727448  | -2.29294776030456 | 0.00176818458279  |
| H | 2.46115827350658  | -1.87144076880670 | 0.03926810186412  |
| H | 3.31405482787927  | 0.45276626417100  | 0.03350131357436  |
| C | -1.95152197062312 | -0.53222148720687 | -0.03422886674933 |
| H | -2.18753571247781 | -1.58800650333930 | -0.10957671804308 |
| C | -2.95224479048337 | 0.33771703879056  | 0.04647441775945  |
| H | -2.79262052715321 | 1.40390586193978  | 0.13277573851620  |
| H | -3.97773623690999 | -0.00228576965317 | 0.03005356778609  |

**(2-methylprop-1-en-1-yl)benzene ( $\beta,\beta$ -dimethylstyrene) 1f**

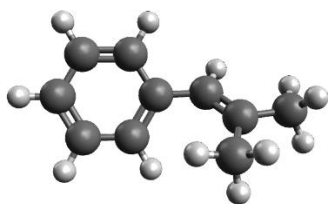

imaginary frequencies: no

Electronic energy ... -388.54403884 Eh

Total Enthalpy ... -388.34336482 Eh

Final Gibbs free energy ... -388.38816500 Eh

|   |                   |                  |                  |
|---|-------------------|------------------|------------------|
| C | -2.15704560281568 | 1.24974497311216 | 0.33875332042756 |
| C | -0.81331857634033 | 0.93233715876228 | 0.48282909654364 |

|   |                   |                   |                   |
|---|-------------------|-------------------|-------------------|
| C | -0.34526334642931 | -0.34873644332281 | 0.18792661639243  |
| C | -1.27146243308766 | -1.31021748960175 | -0.22320470387375 |
| C | -2.61339105472013 | -0.99542318644190 | -0.37024679548621 |
| C | -3.06157924735317 | 0.29035982376467  | -0.09454970034026 |
| H | -2.49848299932525 | 2.24846362578972  | 0.57347409556190  |
| H | -0.12441108637013 | 1.68125942334572  | 0.84551471074623  |
| H | -0.92873697008276 | -2.31503879894638 | -0.43318677026536 |
| H | -3.31054534749651 | -1.75436950406402 | -0.69739352464516 |
| H | -4.10773515202765 | 0.53828181618724  | -0.20604943458653 |
| C | 1.07321867236141  | -0.73469679128677 | 0.33715415685108  |
| H | 1.23406930746848  | -1.71893493559219 | 0.76472661021493  |
| C | 2.15337551855281  | -0.03639158490855 | -0.02010114657689 |
| C | 2.12749900776848  | 1.29983218540747  | -0.70699723012818 |
| H | 1.15116076561144  | 1.54396978071722  | -1.11441994577269 |
| H | 2.41692729613681  | 2.09480536661592  | -0.01727879567552 |
| H | 2.85566481300382  | 1.30700508796618  | -1.51892323622867 |
| C | 3.53037939904781  | -0.58467220452443 | 0.23037986423919  |
| H | 4.07085453676758  | -0.70671078065830 | -0.71008902346508 |
| H | 4.11172833808878  | 0.11136039509930  | 0.83825757679864  |
| H | 3.49643616124116  | -1.54437091742078 | 0.74120425926872  |

## 2-Methyl-1-phenylprop-1-en-3-yl radical

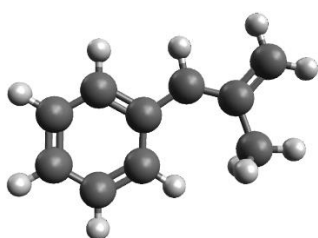

imaginary frequencies: no

Electronic energy ... -387.89990072 Eh

Total Enthalpy ... -387.71227132 Eh

Final Gibbs free energy ... -387.75663674 Eh

|   |                   |                   |                   |
|---|-------------------|-------------------|-------------------|
| C | -3.96031606002087 | -0.93019108439408 | -0.96677533863619 |
| C | -3.05660130685274 | 0.10610114840669  | -0.80456237859033 |

|   |                   |                   |                   |
|---|-------------------|-------------------|-------------------|
| C | -2.44897075031993 | 0.34961143018948  | 0.44352081809416  |
| C | -2.81038560999974 | -0.50470890672764 | 1.50813301473507  |
| C | -3.70993977947637 | -1.53843195678433 | 1.33930257403297  |
| C | -4.29421973198797 | -1.76064733673339 | 0.09624539015213  |
| H | -4.41121270365126 | -1.08957412766283 | -1.93651953352189 |
| H | -2.83454844653251 | 0.72764292691957  | -1.65351159085377 |
| H | -2.36229167201403 | -0.33987214064692 | 2.47896509278320  |
| H | -3.95900454291653 | -2.17404145681755 | 2.17761271469372  |
| H | -5.00053425746656 | -2.56691668333561 | -0.04055915480963 |
| C | -1.50025367739266 | 1.38854935841779  | 0.73864533022498  |
| H | -1.20899204829062 | 1.42910013874898  | 1.78151565705924  |
| C | -0.86141462539453 | 2.35125474681098  | -0.07943525847286 |
| C | 0.01466818898108  | 3.21558822592768  | 0.51179221747604  |
| H | 0.53748497429643  | 3.96388175691154  | -0.06585374377525 |
| H | 0.20917039623609  | 3.17178157284158  | 1.57441650921053  |
| C | -1.09085623075870 | 2.46049157202426  | -1.56562916299703 |
| H | -0.87144850545836 | 1.52162341667105  | -2.07207772720940 |
| H | -2.12390565397140 | 2.72302899909343  | -1.78972205986267 |
| H | -0.44939195700880 | 3.23079740013933  | -1.98600136973302 |

### Diacetyliminoxyl radical (2)

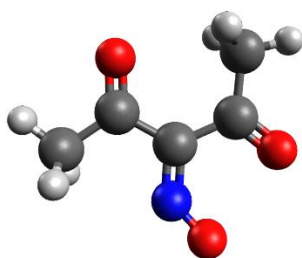

imaginary frequencies: no

Data for CH<sub>2</sub>Cl<sub>2</sub> solution (CPCM(CH<sub>2</sub>Cl<sub>2</sub>)):

Electronic energy ... -474.79857777 Eh

Enthalpy ... -474.68017033 Eh

Gibbs free energy ... -474.72589061 Eh

|   |                   |                   |                   |
|---|-------------------|-------------------|-------------------|
| C | -1.34391360268917 | -1.97489389616281 | -0.00005508129894 |
| C | -1.29677176677711 | -0.47756232467834 | -0.00009543238447 |

|   |                   |                   |                   |
|---|-------------------|-------------------|-------------------|
| H | -2.38322784105653 | -2.28665930100941 | -0.00021990196048 |
| H | -0.82517510300463 | -2.36461085576818 | -0.87290544328720 |
| H | -0.82546969950591 | -2.36455281244627 | 0.87299536447581  |
| C | 0.04154194160710  | 0.21507142047776  | 0.00001427702651  |
| C | 1.38966042617646  | -0.42147987116027 | 0.00009814188540  |
| C | 2.58263817947926  | 0.49500607097513  | -0.00005264118030 |
| H | 2.56416614070916  | 1.13845972353522  | -0.87821958817116 |
| H | 3.48502730169563  | -0.10697632165089 | -0.00017051530053 |
| H | 2.56438424013185  | 1.13844121096024  | 0.87813158923802  |
| N | 0.03481973270437  | 1.50895276970314  | 0.00015508023160  |
| O | -0.83385838676950 | 2.33124860472034  | 0.00016743220168  |
| O | -2.29782998789552 | 0.20371349514827  | -0.00036257502337 |
| O | 1.50248542519456  | -1.62831091264392 | -0.00004570645257 |

Data for gas phase (no solvation model):

Electronic energy           ... -474.78841609 Eh  
Total Enthalpy               ... -474.66962929 Eh  
Final Gibbs free energy     ... -474.71520932 Eh

|   |                   |                   |                   |
|---|-------------------|-------------------|-------------------|
| C | -1.34140521527958 | -1.97497917431078 | -0.00006898190978 |
| C | -1.30009685803088 | -0.47344664682899 | 0.00003582030632  |
| H | -2.38112157417478 | -2.28481331571107 | -0.00023764645348 |
| H | -0.81958013166151 | -2.36818143761489 | -0.86923887197598 |
| H | -0.81982855812343 | -2.36828624207888 | 0.86920050151119  |
| C | 0.03964953081903  | 0.22197756909311  | 0.00005825624254  |
| C | 1.38382950166388  | -0.41891134061871 | 0.00008269222782  |
| C | 2.58669678869240  | 0.49279531190972  | -0.00004607428814 |
| H | 2.57874464641103  | 1.13806076658519  | -0.87674362076284 |
| H | 3.48095650495777  | -0.12084335186668 | -0.00014204149497 |
| H | 2.57892882532954  | 1.13804891115957  | 0.87666144233512  |
| N | 0.02863839009441  | 1.51829825812232  | 0.00006197468771  |



|   |                   |                   |                   |
|---|-------------------|-------------------|-------------------|
| O | -0.85402233003329 | 2.32544483874120  | 0.00005348506205  |
| O | -2.29858871541537 | 0.20363937064273  | -0.00024825399379 |
| O | 1.49567619475078  | -1.62295651722384 | 0.00000631850623  |

### Diacetyl oxime

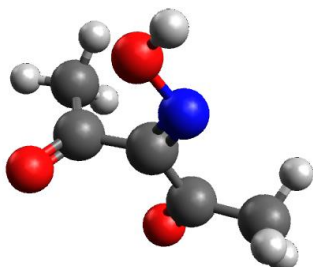

imaginary frequencies: no

Data for CH<sub>2</sub>Cl<sub>2</sub> solution (CPCM(CH<sub>2</sub>Cl<sub>2</sub>)):

|                         |     |                  |
|-------------------------|-----|------------------|
| Electronic energy       | ... | -475.43603163 Eh |
| Total Enthalpy          | ... | -475.30507158 Eh |
| Final Gibbs free energy | ... | -475.35153736 Eh |

|   |                   |                   |                   |
|---|-------------------|-------------------|-------------------|
| N | 0.07089856643062  | 1.52642995515225  | -0.00351077400450 |
| C | 0.09391872015488  | 0.25994541679991  | 0.08295747963054  |
| C | -1.14880453602613 | -0.60169367959328 | 0.23302511795449  |
| C | 1.42095344832879  | -0.43176562240576 | 0.03938659293772  |
| O | -1.52376143229452 | -0.90537804735630 | 1.33914707485547  |
| O | 1.42808377307751  | -1.64462235134335 | 0.06185830751165  |
| O | -1.20828387321412 | 2.02501270283204  | 0.03685887663770  |
| H | -1.09579506008548 | 2.97690770658330  | -0.05630439506377 |
| C | -1.81159149778430 | -1.02781361077846 | -1.03574877159937 |
| H | -2.70240724415936 | -1.60972223480520 | -0.82113584508559 |
| H | -2.06125774375224 | -0.14702992639916 | -1.62696189882794 |
| H | -1.10457114967474 | -1.61984872279287 | -1.61819578312573 |
| C | 2.66344389280294  | 0.40118639869039  | -0.02793145442179 |
| H | 2.62153047039046  | 1.07158117488709  | -0.88381899167265 |
| H | 2.73586931615177  | 1.02101682870923  | 0.86468435827721  |

H 3.52705534965393 -0.25160898817983 -0.09970789400344

Data for gas phase (no solvation model):

Electronic energy ... -475.42109299 Eh

Total Enthalpy ... -475.28970514 Eh

Final Gibbs free energy ... -475.33616994 Eh

N 0.08075203245620 1.53933963430191 -0.06160082723126

C 0.09389766677403 0.27545302367987 0.04711312552590

C -1.14626634858892 -0.58462682288332 0.24538917077548

C 1.41772643337483 -0.42472984377246 -0.03932661092301

O -1.50267667676238 -0.84739159007333 1.36177456844722

O 1.41781117779620 -1.62709348078861 -0.15970698118199

O -1.20338466868230 2.04676356682059 -0.02077028221388

H -1.07399025653585 2.99408446643658 -0.10682832376416

C -1.82538948018700 -1.05845821642233 -1.00316687940917

H -2.70988692735234 -1.63361734974042 -0.74836681886310

H -2.09288636310239 -0.20104876478177 -1.62033319114934

H -1.12615192871671 -1.67437870327486 -1.56891138519947

C 2.66956862615221 0.40216382045639 0.02293038630222

H 2.64778041415619 1.18187510629507 -0.73513530848706

H 2.73046952158723 0.90032259829666 0.98940325991114

H 3.52790777763101 -0.24606044454996 -0.11786190253953

**Transition state for C–O bond formation between 1b and 2 (TS 1b+2 to A')**

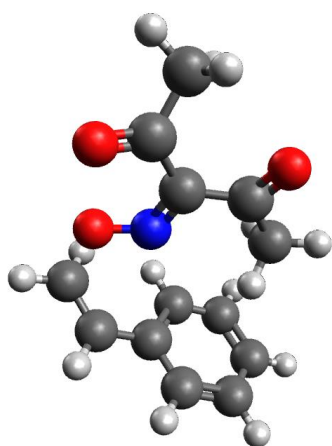

imaginary frequencies: 1

Electronic energy ... -784.63566730 Eh

Enthalpy ... -784.37508299 Eh

Gibbs free energy ... -784.43728515 Eh

|   |                   |                   |                   |
|---|-------------------|-------------------|-------------------|
| C | 3.08584849141190  | -0.88367859667221 | 1.29886834836609  |
| C | 2.40934625915239  | 0.30736917727047  | 1.12214314116860  |
| C | 2.33059337514589  | 0.90342022219311  | -0.14740237885170 |
| C | 2.95944973622774  | 0.25987105710713  | -1.22561185874273 |
| C | 3.62783253926060  | -0.93709409469049 | -1.04662300860070 |
| C | 3.69381691688695  | -1.51330849855844 | 0.21712898233504  |
| H | 3.13902425091451  | -1.32925046497454 | 2.28194516186280  |
| H | 1.94613754068418  | 0.78301766951673  | 1.97344085564036  |
| H | 2.90644330961534  | 0.71157787166706  | -2.20691676796653 |
| H | 4.09899385141955  | -1.42295846535473 | -1.88902162288454 |
| H | 4.21851931420111  | -2.44727169659257 | 0.35952805030743  |
| C | 1.62692995931962  | 2.13673416949112  | -0.38919808430383 |
| H | 1.71626137367679  | 2.55501826057280  | -1.38358639773012 |
| C | 0.75210883791492  | 2.73039738325204  | 0.48758646060574  |
| H | 0.72092823790530  | 2.44366924196827  | 1.52678609863258  |
| H | 0.34632805296204  | 3.70156669138716  | 0.25283915792117  |
| O | -0.98399940039963 | 1.84318263426478  | 0.09417613343292  |
| N | -0.84781884885466 | 0.58246099084676  | 0.06241204516530  |
| C | -1.87332542241840 | -0.20103333902281 | -0.05620384766176 |

|   |                   |                   |                   |
|---|-------------------|-------------------|-------------------|
| C | -1.54991436438170 | -1.65014814671292 | -0.14502475015873 |
| C | -3.28583211707872 | 0.30960619128066  | -0.12407509032288 |
| C | -0.13349827129797 | -2.08504115347306 | 0.11001371754488  |
| H | 0.55958120587937  | -1.55634626879067 | -0.53974383895801 |
| H | 0.15058081804980  | -1.84464212242468 | 1.13261508563110  |
| H | -0.06454173180117 | -3.15559637325521 | -0.05421792701341 |
| C | -4.39075281255046 | -0.53883664227565 | 0.44146030838633  |
| H | -4.71302690394220 | -1.25240706769849 | -0.31436560088629 |
| H | -4.05624320594898 | -1.10823563616230 | 1.30468197128654  |
| H | -5.22242404168774 | 0.10900742605747  | 0.70383821809889  |
| O | -2.41812190413774 | -2.45211200795641 | -0.43598334898364 |
| O | -3.51079004612864 | 1.40641758773965  | -0.59191421332092 |

#### Adduct of 2 to 1b with C–O bond formed (A' from styrene)

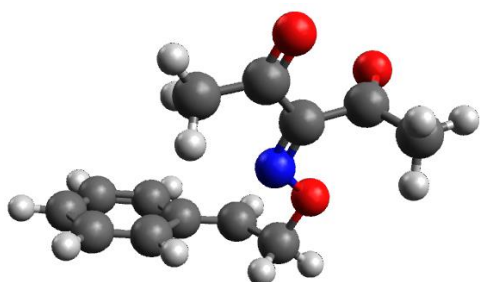

imaginary frequencies: no

Electronic energy ... -784.66639181 Eh

Enthalpy ... -784.40361552 Eh

Gibbs free energy ... -784.46714027 Eh

|   |                  |                   |                   |
|---|------------------|-------------------|-------------------|
| C | 3.45485807864087 | -1.07804865628327 | 0.94634657923005  |
| C | 2.46979526817143 | -0.11229218498602 | 0.94835570758927  |
| C | 2.39583168392104 | 0.85129258846341  | -0.08729195349574 |
| C | 3.36593333747242 | 0.77492702572442  | -1.11819966945453 |
| C | 4.34496719109904 | -0.19520364964789 | -1.11001399967898 |
| C | 4.39932521128666 | -1.12925212205297 | -0.07696908033344 |
| H | 3.48989017022490 | -1.80449055605057 | 1.74624927837756  |
| H | 1.74116757762369 | -0.10414989499804 | 1.74405951815395  |

|   |                   |                   |                   |
|---|-------------------|-------------------|-------------------|
| H | 3.32685589206828  | 1.49973690619866  | -1.92019479222810 |
| H | 5.07300663426471  | -0.23015165962238 | -1.90831558260321 |
| H | 5.16687374956912  | -1.88964952937965 | -0.07054525200316 |
| C | 1.41737480498965  | 1.86524678490168  | -0.13899761987566 |
| H | 1.42136224984509  | 2.52268272029587  | -0.99818817098404 |
| C | 0.34673812902697  | 2.08365373753722  | 0.86364113311919  |
| H | 0.56586695915944  | 1.63987958126929  | 1.83062191414855  |
| H | 0.14785901811627  | 3.14354772313955  | 0.99905340477489  |
| O | -0.93889099817663 | 1.56751612097666  | 0.41192765003731  |
| N | -0.90391846126033 | 0.20222001157758  | 0.39716406661969  |
| C | -1.99650601632124 | -0.30691156123648 | -0.00352195172390 |
| C | -2.10370368870626 | -1.79765918134904 | -0.04696535414300 |
| C | -3.20053020705655 | 0.50683066728265  | -0.44237506749624 |
| C | -0.89048159406791 | -2.60944668681262 | 0.28963266380572  |
| H | -0.07564587737072 | -2.35471373553140 | -0.38594812851056 |
| H | -0.55488664874261 | -2.37524487264381 | 1.29825536882625  |
| H | -1.13276859589794 | -3.66392541709739 | 0.20825666862751  |
| C | -4.12649679461616 | 0.95043123150643  | 0.64282535627261  |
| H | -4.53497249364549 | 0.06652200748521  | 1.13463687990031  |
| H | -3.56449756870776 | 1.50789309874629  | 1.39150083005565  |
| H | -4.92826324735581 | 1.55791668981137  | 0.23485310671395  |
| O | -3.17281607505023 | -2.28370275954414 | -0.35228053546858 |
| O | -3.35807968850393 | 0.73791957231938  | -1.61680496825332 |

**Transition state for C–O bond formation between 1f and 2 (TS 1f+2 to A')**

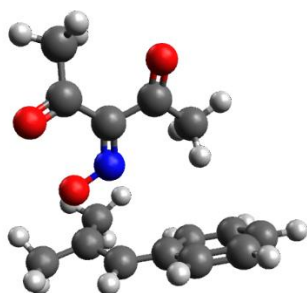

imaginary frequencies: 1

Electronic energy ... -863.32381023 Eh

Total Enthalpy ... -863.00442015 Eh

Final Gibbs free energy ... -863.07187058 Eh

|   |                   |                   |                   |
|---|-------------------|-------------------|-------------------|
| C | 3.35426385286969  | -1.31317136837829 | 0.92067772876835  |
| C | 2.74393480043490  | -0.07544968420893 | 0.82288267621426  |
| C | 2.25944651637591  | 0.38886324166243  | -0.41170763674149 |
| C | 2.44735831183254  | -0.42923459250633 | -1.54133409832436 |
| C | 3.04429037404458  | -1.67102625997059 | -1.43640658227090 |
| C | 3.49689560762894  | -2.12132492166469 | -0.20099547047961 |
| H | 3.72416498691537  | -1.65005393859019 | 1.87861611893013  |
| H | 2.67352158626139  | 0.54074208204584  | 1.70278011379745  |
| H | 2.09871218890057  | -0.07695571087902 | -2.50257887650929 |
| H | 3.16297049653397  | -2.28792644883096 | -2.31573830135551 |
| H | 3.96759468466587  | -3.09028762333221 | -0.11521486285370 |
| C | 1.59742165364171  | 1.65135222294678  | -0.61959637289532 |
| H | 1.57476434083429  | 1.98546583244846  | -1.64950242357751 |
| C | 0.80914599636017  | 2.39579285107307  | 0.25690904447028  |
| O | -0.92585627394664 | 1.49420695106451  | -0.23693110249807 |
| N | -0.87317819271409 | 0.26466030069869  | 0.06608912435796  |
| C | -1.91372482348866 | -0.50702866025597 | -0.01963009236343 |
| C | -1.64552584867499 | -1.92757805060533 | 0.32640000788387  |
| C | -3.26785073132575 | -0.01790931446791 | -0.44114208747959 |
| C | -0.30570264495443 | -2.27355111547551 | 0.92055455766062  |
| H | 0.49506700803621  | -2.01460062130421 | 0.23116348893910  |
| H | -0.13373728643992 | -1.70334085489662 | 1.83107614143888  |
| H | -0.28550953998785 | -3.33773280559312 | 1.13336913895459  |
| C | -4.49042519930015 | -0.73354668987128 | 0.06511157425320  |
| H | -4.68830495045390 | -1.59496440932908 | -0.56986840296093 |
| H | -4.34910860458484 | -1.10345168779675 | 1.07713194646001  |

|   |                   |                   |                   |
|---|-------------------|-------------------|-------------------|
| H | -5.33275771073682 | -0.04904099829850 | 0.01659112075877  |
| O | -2.48171761920209 | -2.78669464458180 | 0.11263358054244  |
| O | -3.36831094208529 | 0.96408983295143  | -1.14889452924609 |
| C | 0.36694753559619  | 3.75549667151238  | -0.19069459664862 |
| H | 0.38402781623367  | 3.84954147466522  | -1.27321709255390 |
| H | -0.63619988224718 | 3.96363874647017  | 0.17594209404424  |
| H | 1.03516313952809  | 4.50572093303769  | 0.23480385384415  |
| C | 0.73857968980592  | 2.15609219712488  | 1.73231802519858  |
| H | 0.61711884801357  | 1.10145296204344  | 1.96315984120919  |
| H | 1.65345562957026  | 2.50826560337013  | 2.21028165192799  |
| H | -0.09670681394120 | 2.70942649772217  | 2.15444369910424  |

**Adduct of 2 to 1f with C–O bond formed (A' from  $\beta,\beta$ -dimethylstyrene 1f)**

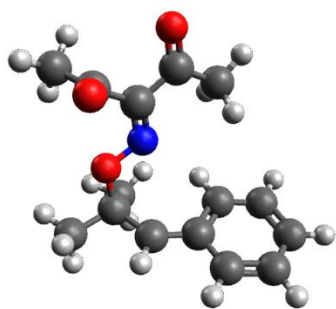

imaginary frequencies: no

Electronic energy ... -863.34852118 Eh

Total Enthalpy ... -863.02749899 Eh

Final Gibbs free energy ... -863.09595492 Eh

|   |                  |                   |                   |
|---|------------------|-------------------|-------------------|
| C | 3.24164359481398 | -1.53169612885499 | 0.67602244655307  |
| C | 2.29970024633643 | -0.52573284255949 | 0.59142530898164  |
| C | 2.24272274021828 | 0.32704465107479  | -0.53732288012151 |
| C | 3.18902672309597 | 0.08755681618147  | -1.56888340413370 |
| C | 4.12518500582934 | -0.91926605377139 | -1.47461351584750 |
| C | 4.16170751979095 | -1.73887204055666 | -0.34820032708125 |
| H | 3.25538167927546 | -2.17132866959455 | 1.54767575328183  |

|   |                   |                   |                   |
|---|-------------------|-------------------|-------------------|
| H | 1.58292603623969  | -0.41748467920214 | 1.38448224648261  |
| H | 3.16571240636119  | 0.71983469092943  | -2.44627211549323 |
| H | 4.83099828203416  | -1.07244431928099 | -2.27892106755170 |
| H | 4.89293834108958  | -2.53070142646588 | -0.27275578219713 |
| C | 1.32631138394726  | 1.38444072964373  | -0.73697525526388 |
| H | 1.39350772477993  | 1.86820480198696  | -1.70325388686356 |
| C | 0.25368049467399  | 1.95354427239683  | 0.14695744533535  |
| O | -1.00410816284124 | 1.19911214741199  | -0.05503571834968 |
| N | -0.87515007854549 | -0.09571012782188 | 0.33630901299276  |
| C | -1.93147984824182 | -0.77363011472348 | 0.13724379255290  |
| C | -1.92453622801600 | -2.21277484772447 | 0.53669142609376  |
| C | -3.19022450240304 | -0.20913656639609 | -0.49525093815590 |
| C | -0.65472522349693 | -2.79400941818180 | 1.07905006384214  |
| H | 0.14664929253796  | -2.67925571576808 | 0.35163252376729  |
| H | -0.35088088199245 | -2.25350632114535 | 1.97374948658671  |
| H | -0.81211819132218 | -3.84274356863498 | 1.30852662683053  |
| C | -4.15308149035830 | 0.46223180672067  | 0.42902279343270  |
| H | -4.51476647948555 | -0.27391888946012 | 1.14839590379881  |
| H | -3.63507156310341 | 1.23870681918452  | 0.99111888369748  |
| H | -4.98516351706191 | 0.88176272506864  | -0.12783670649854 |
| O | -2.94927206656036 | -2.85041333033415 | 0.40676379689641  |
| O | -3.35959177536593 | -0.33738045034933 | -1.68399161517256 |
| C | -0.12342019664898 | 3.33620186567867  | -0.36579147704069 |
| H | -0.39328091145161 | 3.29315943802641  | -1.41912512810696 |
| H | -0.96284100109900 | 3.73077582463118  | 0.20242114911917  |
| H | 0.72401536580736  | 4.00875377049827  | -0.24981668173582 |
| C | 0.55964876153287  | 2.01855500331399  | 1.63733439584182  |
| H | 0.54619291055328  | 1.04134505035320  | 2.10496263307524  |
| H | 1.54003904593006  | 2.46406653207331  | 1.79257948430339  |
| H | -0.18667443685359 | 2.63950756565175  | 2.12951532614798  |



Transition state for C–N bond formation between 1b and 2 (TS 1b+2 to B')

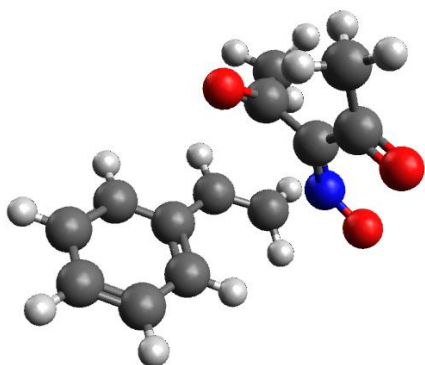

imaginary frequencies: 1

Electronic energy ... -784.63301352 Eh

Enthalpy ... -784.37211312 Eh

Gibbs free energy ... -784.43369526 Eh

|   |                   |                   |                   |
|---|-------------------|-------------------|-------------------|
| C | 3.08400687008365  | 1.69761945582824  | 0.37725008051594  |
| C | 2.13602392359473  | 1.12014742153377  | -0.44753384162212 |
| C | 2.02100190385288  | -0.27622582341806 | -0.53081101447020 |
| C | 2.87849166586955  | -1.06479751113955 | 0.25080486753097  |
| C | 3.82907604334246  | -0.48370853983361 | 1.07016473279872  |
| C | 3.93582048177733  | 0.90091633250570  | 1.13580906274347  |
| H | 3.15942015262534  | 2.77419392377328  | 0.43470486997464  |
| H | 1.47510673059805  | 1.75552760109072  | -1.01914370348627 |
| H | 2.78639161144443  | -2.14153424059389 | 0.20349618871608  |
| H | 4.48448917554306  | -1.10683774922626 | 1.66179451493199  |
| H | 4.67482143424224  | 1.35830991441118  | 1.77819560308415  |
| C | 1.04042359309724  | -0.93061783390170 | -1.36237881469429 |
| H | 0.96650071128108  | -2.00446077833433 | -1.25494940300074 |
| C | 0.16071868694001  | -0.28642032647819 | -2.21616785324152 |
| H | 0.38784701842974  | 0.70759879554312  | -2.56830803134107 |
| H | -0.43756950589834 | -0.88179158848594 | -2.88979779180396 |
| O | -1.67775693746769 | 1.59242003080400  | -1.75765787595800 |
| N | -1.36758720348070 | 0.54589179990861  | -1.22002364490820 |

|   |                   |                   |                   |
|---|-------------------|-------------------|-------------------|
| C | -1.76573059798202 | 0.05866899995332  | -0.08122567098693 |
| C | -2.70502249301229 | 0.82335737386964  | 0.78979832832441  |
| C | -1.25644225785006 | -1.29009682837618 | 0.35670510311315  |
| C | -3.16245178009492 | 0.14658564224839  | 2.05523137068089  |
| H | -3.48937928249532 | -0.87333705446400 | 1.85852684653449  |
| H | -2.33680752767164 | 0.09362599535219  | 2.76233476769118  |
| H | -3.97604714886872 | 0.72335710676318  | 2.48238544183884  |
| C | -1.65725372681985 | -2.48149332539909 | -0.46145299474174 |
| H | -1.60956380663427 | -2.28223631462533 | -1.52775058356700 |
| H | -1.05276881912123 | -3.34330565114471 | -0.19631728429862 |
| H | -2.70334914563389 | -2.68856250755678 | -0.22319635373655 |
| O | -3.08782589203043 | 1.93451155867480  | 0.48992441971568  |
| O | -0.65589887766041 | -1.39183787928251 | 1.40328766366259  |

**Adduct of 2 to 1b with C–N bond formed (B')**

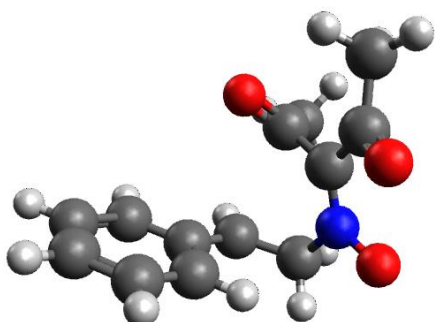

imaginary frequencies: no

Electronic energy ... -784.65390944 Eh

Enthalpy ... -784.39053023 Eh

Gibbs free energy ... -784.45124714 Eh

|   |                  |                   |                   |
|---|------------------|-------------------|-------------------|
| C | 2.81322777262960 | 1.69980972606475  | 0.51224249991749  |
| C | 1.90123607113960 | 1.11293731897811  | -0.34187104634758 |
| C | 1.89501053475322 | -0.28768510211069 | -0.53406331484526 |
| C | 2.84492390134527 | -1.05845466295303 | 0.17445933625122  |
| C | 3.75059440485679 | -0.46168393289354 | 1.02523497558822  |
| C | 3.74035452984214 | 0.92122377750789  | 1.20037432203010  |

|   |                   |                   |                   |
|---|-------------------|-------------------|-------------------|
| H | 2.80532043167048  | 2.77211690651479  | 0.64705506590969  |
| H | 1.19260160032096  | 1.73832377937669  | -0.86589427789898 |
| H | 2.84636904332258  | -2.13176406892923 | 0.04112414594591  |
| H | 4.46841815447681  | -1.06824971071731 | 1.55899151599137  |
| H | 4.44940746110708  | 1.38868929712836  | 1.86837878182208  |
| C | 0.96130890039903  | -0.93659736302640 | -1.36991503885430 |
| H | 1.03701485374241  | -2.00649055685169 | -1.49026505201737 |
| C | -0.08934692135983 | -0.21960449455816 | -2.12962213971706 |
| H | 0.31397998529881  | 0.58617859203872  | -2.73814258375244 |
| H | -0.65542084714042 | -0.87956782996650 | -2.77946531312186 |
| O | -1.49787101252906 | 1.59070069216713  | -1.78779188479341 |
| N | -1.10802282284189 | 0.51599861240787  | -1.27965250973608 |
| C | -1.50138836164008 | 0.04809872495689  | -0.11949097112425 |
| C | -2.35170778112070 | 0.87496589251313  | 0.79425812266969  |
| C | -1.07208830939341 | -1.30817497285739 | 0.37973929453085  |
| C | -3.12557057192678 | 0.13796377213089  | 1.85676519517416  |
| H | -3.48702035357648 | -0.82643686212836 | 1.50585520228601  |
| H | -2.47861557039810 | -0.03922180514407 | 2.71434185266865  |
| H | -3.95960695476020 | 0.75996789984758  | 2.16631548976976  |
| C | -1.49400901103457 | -2.53450192434904 | -0.37998008307862 |
| H | -1.54015850398696 | -2.38522175561520 | -1.45345519820204 |
| H | -0.84206760697213 | -3.36669991056252 | -0.13242811731622 |
| H | -2.50562155893365 | -2.77124046677113 | -0.04174206900068 |
| O | -2.40277491151112 | 2.08180704223792  | 0.70659373470107  |
| O | -0.55756585377939 | -1.38168747043644 | 1.47524515654991  |

**Transition state for C–N bond formation between 1f and 2 (TS 1f+2 to B')**

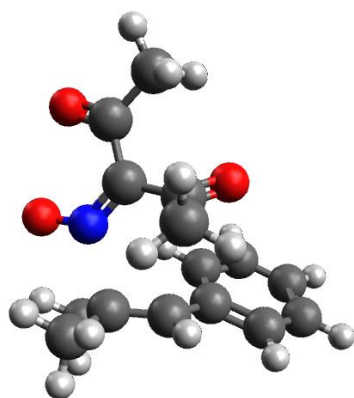

imaginary frequencies: 1

Electronic energy ... -863.31194929 Eh  
 Total Enthalpy ... -862.99243932 Eh  
 Final Gibbs free energy ... -863.05968954 Eh

|   |                   |                   |                   |
|---|-------------------|-------------------|-------------------|
| C | -2.72549641274618 | -1.17476707103012 | -1.62946489426982 |
| C | -1.79051750944056 | -0.27614667823057 | -1.14998301689542 |
| C | -1.96143579274090 | 0.33351813753386  | 0.10313483998491  |
| C | -3.08792118877225 | -0.02375306080851 | 0.86269181800071  |
| C | -4.02803614313370 | -0.91163632480058 | 0.37425199095043  |
| C | -3.85260316626794 | -1.48881050192250 | -0.87795783057813 |
| H | -2.56939354659383 | -1.64448922801725 | -2.59024304043964 |
| H | -0.90186523484453 | -0.08683073448082 | -1.73100997376580 |
| H | -3.21661779917429 | 0.41473898129106  | 1.84312242054140  |
| H | -4.89336708449493 | -1.16175985432355 | 0.97147566365153  |
| H | -4.58062831779144 | -2.19056673762253 | -1.25915229869287 |
| C | -1.01854742416445 | 1.24721197322869  | 0.69737643855559  |
| H | -1.09165463885504 | 1.33973345969275  | 1.77366835409910  |
| C | -0.05146837222086 | 2.05929760024101  | 0.07199924695003  |
| O | 2.21624342646036  | 1.40102027051495  | -1.24971000857407 |
| N | 1.52597227872372  | 0.85384648110938  | -0.39920471399649 |
| C | 1.68154151671096  | -0.36461507448446 | 0.04754221961773  |
| C | 2.71934925139925  | -1.26845426843662 | -0.52820886682551 |
| C | 0.83526243857577  | -0.88777870300729 | 1.17870708247519  |
| C | 2.90345462210205  | -2.61039284590278 | 0.13586551334814  |
| H | 2.96756070997178  | -2.51317743320305 | 1.21848195530940  |

|   |                   |                   |                   |
|---|-------------------|-------------------|-------------------|
| H | 2.05203743965186  | -3.25152524832252 | -0.08383884261902 |
| H | 3.81082772491286  | -3.06299796883616 | -0.25020279307422 |
| C | 1.04735761304707  | -0.29554658961281 | 2.54186151150678  |
| H | 1.28754679876005  | 0.76066889627443  | 2.50510076849733  |
| H | 0.18606692487545  | -0.48348117702737 | 3.17609816587932  |
| H | 1.91457937587179  | -0.80760541656011 | 2.96708220768704  |
| O | 3.39231357905509  | -0.95147160794505 | -1.48783381694434 |
| O | 0.14203940541993  | -1.86664021563233 | 1.00836418977928  |
| C | -0.28590022609151 | 2.59948102090779  | -1.31198944092448 |
| H | -0.79922528827897 | 1.91742802569584  | -1.97610802269815 |
| H | -0.89970458192658 | 3.49399152130551  | -1.20003009667429 |
| H | 0.65775397229622  | 2.90057789160637  | -1.75912833240966 |
| C | 0.66640073797469  | 3.05323425930222  | 0.94886118231878  |
| H | 1.64327973669416  | 3.29133838453821  | 0.53212570918119  |
| H | 0.08823362288341  | 3.97746584803853  | 0.97298343416790  |
| H | 0.78271455215152  | 2.70223598892637  | 1.96955127688013  |

#### Adduct of 2 to 1f with C–N bond formed (B')

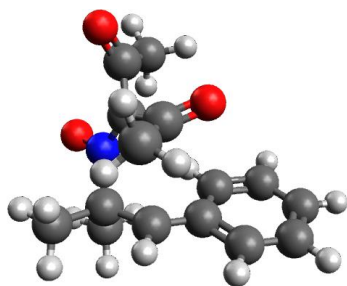

imaginary frequencies: no

Electronic energy ... -863.33439995 Eh

Total Enthalpy ... -863.01271931 Eh

Final Gibbs free energy ... -863.07963942 Eh

|   |                   |                   |                   |
|---|-------------------|-------------------|-------------------|
| C | -2.85232195671178 | -1.15606381995109 | -1.59352824037309 |
| C | -1.83681798042441 | -0.33791783372696 | -1.14523924770319 |
| C | -1.95850774381469 | 0.36496386602414  | 0.07707711585190  |
| C | -3.15318451315521 | 0.18568859318877  | 0.81612556247175  |

|   |                   |                   |                   |
|---|-------------------|-------------------|-------------------|
| C | -4.16273292496921 | -0.63298288554942 | 0.35814313764992  |
| C | -4.02068273134867 | -1.31068734937432 | -0.85102210565286 |
| H | -2.73424775273519 | -1.68701188379741 | -2.52755812743194 |
| H | -0.93474342560663 | -0.26035088942703 | -1.73115952694908 |
| H | -3.26231999856142 | 0.70832243445902  | 1.75678440364416  |
| H | -5.06548290047732 | -0.74932877883060 | 0.94101590356329  |
| H | -4.81002990843424 | -1.95574737698389 | -1.20904654661551 |
| C | -0.95241643358739 | 1.18742728093473  | 0.62848654413462  |
| H | -1.16750959786621 | 1.63894710762008  | 1.58677537346015  |
| C | 0.30987486630425  | 1.64943742637660  | -0.03123374785993 |
| O | 2.11684024183932  | 0.72812567290092  | -1.26125533443873 |
| N | 1.24083161859134  | 0.48385046626126  | -0.36519493512491 |
| C | 1.20098017134601  | -0.68103310551751 | 0.19533019121566  |
| C | 2.15269892106115  | -1.71081798620808 | -0.37666827774611 |
| C | 0.32314933844236  | -1.19354926242479 | 1.30576540901163  |
| C | 1.84419469072628  | -2.21912195212504 | -1.75073558884474 |
| H | 1.10158213961640  | -3.01148724261317 | -1.63628607837040 |
| H | 1.42172289071562  | -1.43878978123962 | -2.37590753231142 |
| H | 2.73910318929015  | -2.63498755549364 | -2.20452446019443 |
| C | 0.42996191487733  | -0.62148520179414 | 2.68674881638709  |
| H | 0.69714884185575  | 0.42693898551449  | 2.69988359730785  |
| H | -0.49911697594527 | -0.78938176540100 | 3.22397793856861  |
| H | 1.22799180460983  | -1.17623089743123 | 3.18603332671253  |
| O | 3.04465916425961  | -2.13975788884405 | 0.31658637152726  |
| O | -0.30396829977476 | -2.20568053019097 | 1.07791192051840  |
| C | 0.00174647554277  | 2.39474600524764  | -1.33570951135504 |
| H | -0.46831925650915 | 1.75894871665683  | -2.07749596174730 |
| H | -0.68593443477462 | 3.20096142765163  | -1.08985073277463 |
| H | 0.90792639863678  | 2.81898898930078  | -1.75389414235769 |
| C | 1.11025402487768  | 2.57979113189377  | 0.88036578234021  |

|   |                  |                  |                  |
|---|------------------|------------------|------------------|
| H | 2.03360413021662 | 2.87132809889777 | 0.38728242094036 |
| H | 0.51950063830640 | 3.47246586382641 | 1.07230068391252 |
| H | 1.35119308358052 | 2.11447407016913 | 1.83168070863307 |

**TS for allylic hydrogen atom abstraction by diacetyliminoxyl from  $\beta,\beta$ -dimethylstyrene 1f**

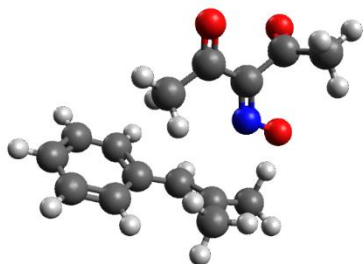

imaginary frequencies: 1

|                         |     |                  |
|-------------------------|-----|------------------|
| Electronic energy       | ... | -863.31025191 Eh |
| Total Enthalpy          | ... | -862.99507143 Eh |
| Final Gibbs free energy | ... | -863.06399519 Eh |

|   |                   |                   |                   |
|---|-------------------|-------------------|-------------------|
| C | -4.07436247169920 | -0.80801724029081 | -0.92601776397643 |
| C | -3.20838171520678 | 0.25551414726664  | -0.73374525197334 |
| C | -2.49744651616364 | 0.38672362973655  | 0.46695257330288  |
| C | -2.72235949229083 | -0.56395652231521 | 1.47500072907147  |
| C | -3.57999098253216 | -1.63011567082950 | 1.27681221806100  |
| C | -4.25602915855193 | -1.75967560505502 | 0.06966694314078  |
| H | -4.61590061755576 | -0.89190843157275 | -1.85749571113684 |
| H | -3.10908235751523 | 0.99312266767980  | -1.51188926742643 |
| H | -2.19688630212899 | -0.46269263481410 | 2.41493381867146  |
| H | -3.72495669949284 | -2.35825742788338 | 2.06203065096669  |
| H | -4.92959563301325 | -2.58961161569069 | -0.08971473809839 |
| C | -1.54143014771227 | 1.43856248976972  | 0.75951260110328  |
| H | -1.30791062913522 | 1.53979150399849  | 1.81294475148573  |
| C | -0.85982042903180 | 2.28946188334346  | -0.07690966900932 |
| O | 2.12477636126409  | 1.64482205195100  | 0.51034825593388  |

|   |                   |                   |                   |
|---|-------------------|-------------------|-------------------|
| N | 1.50253604450603  | 0.60273099350276  | 0.06912900492626  |
| C | 2.16667760526282  | -0.49057479782500 | -0.03677340693009 |
| C | 1.51183707908368  | -1.70426500801009 | -0.57326423871448 |
| C | 3.62665831442284  | -0.57552083008047 | 0.36256680603121  |
| C | 0.04640640967792  | -1.66451609961236 | -0.88550687943861 |
| H | -0.51922132724569 | -1.55321618032312 | 0.03792767062142  |
| H | -0.19141633332997 | -0.80737224494397 | -1.50955207136429 |
| H | -0.23827965591571 | -2.58655082114397 | -1.38193867257312 |
| C | 4.61864745178278  | -0.09291154993270 | -0.64760951086446 |
| H | 4.53704047958243  | -0.71575400310833 | -1.53952276593675 |
| H | 4.36848779803075  | 0.92647423000841  | -0.94024355917162 |
| H | 5.62711428906872  | -0.13845139517018 | -0.24827504419283 |
| O | 2.19164879692409  | -2.70085433679154 | -0.74333142885373 |
| O | 3.92734096554248  | -1.01646106353533 | 1.44727307190987  |
| C | 0.05136100863172  | 3.23029073797634  | 0.51991207339726  |
| H | 1.10079330945446  | 2.59368336412730  | 0.53175263047253  |
| H | 0.29615668079195  | 4.09962719719961  | -0.08321683626909 |
| H | -0.11815263151224 | 3.45682931327099  | 1.56804288913757  |
| C | -0.93452095491202 | 2.27010229285762  | -1.57448281540361 |
| H | -1.02884158369703 | 1.26324957334487  | -1.96965238681740 |
| H | -1.79319836269727 | 2.84860105130593  | -1.91951947046476 |
| H | -0.04161459268690 | 2.72742835158904  | -1.99366519961768 |

### Di-*tert*-butyliminoxyl

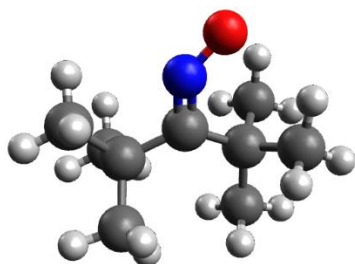

imaginary frequencies: no

Data for CH<sub>2</sub>Cl<sub>2</sub> solution (CPCM(CH<sub>2</sub>Cl<sub>2</sub>)):



Electronic energy ... -484.00852848 Eh  
 Total Enthalpy ... -483.73536868 Eh  
 Final Gibbs free energy ... -483.78750995 Eh

|   |                   |                   |                   |
|---|-------------------|-------------------|-------------------|
| C | 1.48505611190356  | -0.10821599106567 | -0.00526578777287 |
| C | 0.02776470797310  | 0.36120739939316  | -0.08446857663970 |
| C | -1.25097818689600 | -0.50354138410602 | -0.01853493319373 |
| N | -0.12248407212637 | 1.62647860912031  | -0.10602531630711 |
| O | -1.07028617972230 | 2.41549718968185  | -0.09402982002960 |
| C | -1.02231263496831 | -2.00603639866905 | -0.20744342153225 |
| H | -0.32280186603530 | -2.42957007611189 | 0.50620069267879  |
| H | -1.98051280363957 | -2.50376770609761 | -0.06173130146380 |
| H | -0.68327476897607 | -2.23702526738784 | -1.21361217173865 |
| C | -1.88807189864805 | -0.27350918643794 | 1.36081462709572  |
| H | -1.23197757915507 | -0.62909760627916 | 2.15407511700184  |
| H | -2.09797557152118 | 0.78091904031373  | 1.52994902780533  |
| H | -2.82815148962782 | -0.82108043250422 | 1.42404872982644  |
| C | 1.83511482990698  | -1.11323018999704 | -1.11357203599846 |
| H | 1.50056094020875  | -0.75411145124894 | -2.08639897839901 |
| H | 2.91784238121134  | -1.22862360738898 | -1.15195750542407 |
| H | 1.40922802057120  | -2.09475567497683 | -0.94092261842955 |
| C | 2.42586826472033  | 1.09243888254863  | -0.16694773204811 |
| H | 3.45424439892022  | 0.74313996102165  | -0.08576309442322 |
| H | 2.30168348776757  | 1.56560242197384  | -1.14001963664158 |
| H | 2.25949183495558  | 1.84233642795977  | 0.60384179088991  |
| C | -2.22722273965304 | -0.07134835993333 | -1.12242030065597 |
| H | -2.53554429752678 | 0.96499855665411  | -1.02375089809539 |
| H | -1.77942960773110 | -0.21019441686403 | -2.10595521502344 |
| H | -3.11931523863041 | -0.69428704389816 | -1.06543982586241 |
| C | 1.75251348544203  | -0.72207942159150 | 1.37819169775556  |

|   |                  |                   |                  |
|---|------------------|-------------------|------------------|
| H | 1.58913376403134 | 0.01869035707343  | 2.16028618574364 |
| H | 1.12068478160598 | -1.58053387458416 | 1.58677911002330 |
| H | 2.79040392563936 | -1.05092875659810 | 1.43059519085838 |

Data for gas phase (no solvation model):

|                         |     |                  |
|-------------------------|-----|------------------|
| Electronic energy       | ... | -484.00313355 Eh |
| Total Enthalpy          | ... | -483.72937146 Eh |
| Final Gibbs free energy | ... | -483.78144111 Eh |

|   |                   |                   |                   |
|---|-------------------|-------------------|-------------------|
| C | 1.48538621296869  | -0.10840043900506 | -0.00608410998947 |
| C | 0.02795126487502  | 0.36044351618773  | -0.07835235777090 |
| C | -1.25054290067749 | -0.50404505808203 | -0.01686496152727 |
| N | -0.12537629895293 | 1.62744751538659  | -0.08445335069458 |
| O | -1.07948081528923 | 2.39893915524152  | -0.06094979908692 |
| C | -1.02498483416919 | -2.00781174581831 | -0.19895326078497 |
| H | -0.32925333804643 | -2.43182894124587 | 0.51850292375425  |
| H | -1.98272113198804 | -2.50710538658429 | -0.05546865187740 |
| H | -0.68301975025723 | -2.24610547667715 | -1.20246523532601 |
| C | -1.89870479794306 | -0.26879641237661 | 1.35654959169185  |
| H | -1.25093468620568 | -0.62477840234797 | 2.15673733546299  |
| H | -2.10350208720132 | 0.78677982208298  | 1.52128800994531  |
| H | -2.84250161402676 | -0.81052323722490 | 1.41798742581205  |
| C | 1.83512944322935  | -1.11114577455228 | -1.11648161512189 |
| H | 1.50118260877837  | -0.74956812137058 | -2.08849756927146 |
| H | 2.91732202777045  | -1.23017660033863 | -1.15978770739592 |
| H | 1.40925999928689  | -2.09358200466919 | -0.94818013395103 |
| C | 2.42296311216440  | 1.09441394519065  | -0.17038408190299 |
| H | 3.45398132927534  | 0.75097659675900  | -0.09495458102886 |
| H | 2.29151485469673  | 1.57035974950028  | -1.14057567984759 |
| H | 2.25695979406230  | 1.84478659540454  | 0.59916859894409  |
| C | -2.21850952673110 | -0.07251067208297 | -1.12854419717196 |

|   |                   |                   |                   |
|---|-------------------|-------------------|-------------------|
| H | -2.50853544340310 | 0.97009829426108  | -1.04554764200971 |
| H | -1.77095468797593 | -0.22947633096028 | -2.10943635912392 |
| H | -3.12176595803095 | -0.67947155448472 | -1.06981500848280 |
| C | 1.76283816471021  | -0.72461929720096 | 1.37443579896695  |
| H | 1.60064477118177  | 0.01326925725378  | 2.15912973438625  |
| H | 1.13402112221329  | -1.58488222630099 | 1.58596547912678  |
| H | 2.80088516568562  | -1.05331476594534 | 1.42655440427512  |

### Di-*tert*-butyl oxime

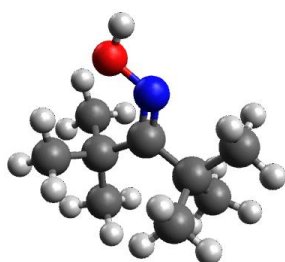

imaginary frequencies: no

Data for CH<sub>2</sub>Cl<sub>2</sub> solution (CPCM(CH<sub>2</sub>Cl<sub>2</sub>)):

|                         |     |                  |
|-------------------------|-----|------------------|
| Electronic energy       | ... | -484.64242241 Eh |
| Total Enthalpy          | ... | -484.35641949 Eh |
| Final Gibbs free energy | ... | -484.40821716 Eh |

|   |                   |                   |                   |
|---|-------------------|-------------------|-------------------|
| C | -2.63100117462698 | -0.76780137877159 | 1.76589585788899  |
| C | -1.54738687273796 | -0.07366322042404 | 0.91306764506208  |
| C | -1.54861809121093 | 1.42502292585447  | 0.53882462614114  |
| N | -0.59564197500111 | -0.87156490311250 | 0.62196548224139  |
| O | 0.48575838289180  | -0.31696180710315 | -0.07425135988392 |
| C | -2.84035444132422 | 2.19315559112385  | 0.85570064974351  |
| H | -3.15341692419693 | 2.11875500997400  | 1.89130288253904  |
| H | -2.64639647878828 | 3.24553636807633  | 0.65012533129625  |
| H | -3.66242507814269 | 1.88571416563458  | 0.21576576122852  |
| C | -0.41579449769076 | 2.11270646640038  | 1.32316632131868  |
| H | -0.61796060139844 | 2.07510380037535  | 2.39351049150196  |

|   |                   |                   |                   |
|---|-------------------|-------------------|-------------------|
| H | 0.54786916452197  | 1.65210726493923  | 1.13479546667906  |
| H | -0.36273197324273 | 3.16109702731269  | 1.02869466677277  |
| C | -4.04934559279504 | -0.58047802617793 | 1.19820028032610  |
| H | -4.06433541880445 | -0.72934869386561 | 0.11854563721636  |
| H | -4.70515320482382 | -1.32611024929916 | 1.64599759676686  |
| H | -4.47102013671868 | 0.39236816363115  | 1.41817404399531  |
| C | -2.38780718973971 | -2.28261459737975 | 1.83798176279238  |
| H | -3.16301573018978 | -2.72098796042580 | 2.46602833521585  |
| H | -2.44307674298726 | -2.74251867949739 | 0.85291079214349  |
| H | -1.42004999100856 | -2.52081432535933 | 2.26905736425178  |
| C | -1.34761572601645 | 1.60389857231581  | -0.97916206674174 |
| H | -0.37482125888292 | 1.27697584130394  | -1.32083832444450 |
| H | -2.11221901419154 | 1.05363034374059  | -1.52790377403831 |
| H | -1.46187832924276 | 2.66078237415395  | -1.22079586829582 |
| C | -2.55159547385236 | -0.23870152678295 | 3.20765272175839  |
| H | -1.57430703315706 | -0.45945183449616 | 3.63606054396076  |
| H | -2.71824171631252 | 0.83145563757533  | 3.28114148436294  |
| H | -3.30838460530222 | -0.73580841754332 | 3.81480385595113  |
| H | 1.06943639397241  | -1.07242281417297 | -0.17787453175047 |

Data for gas phase (no solvation model):

|                         |     |                  |
|-------------------------|-----|------------------|
| Electronic energy       | ... | -484.63578452 Eh |
| Total Enthalpy          | ... | -484.34901212 Eh |
| Final Gibbs free energy | ... | -484.40074377 Eh |

|   |                   |                   |                   |
|---|-------------------|-------------------|-------------------|
| C | -2.63385893714907 | -0.76747576764489 | 1.76572015386315  |
| C | -1.55064088148861 | -0.07042041312441 | 0.91506580344054  |
| C | -1.54837203052908 | 1.42771666322387  | 0.54028678854116  |
| N | -0.60086735628602 | -0.86908360540321 | 0.62655961856964  |
| O | 0.48029349564300  | -0.31358230401036 | -0.06678940780731 |
| C | -2.83761283434894 | 2.19848658367092  | 0.85942147687698  |

|   |                   |                   |                   |
|---|-------------------|-------------------|-------------------|
| H | -3.14905356248942 | 2.12533374028414  | 1.89582408481829  |
| H | -2.64554010862452 | 3.25135479241573  | 0.65487614709052  |
| H | -3.66298600682254 | 1.89435690127586  | 0.22210397795593  |
| C | -0.41097919611635 | 2.11185415204172  | 1.32046368771698  |
| H | -0.60861359093796 | 2.07700833821858  | 2.39176479388015  |
| H | 0.54889465541557  | 1.64527103320530  | 1.12971161325609  |
| H | -0.35129805040804 | 3.15990617902581  | 1.02586750832789  |
| C | -4.05171198126964 | -0.58439820412589 | 1.19689010895488  |
| H | -4.06688237256675 | -0.74261149858335 | 0.11867787662603  |
| H | -4.70973330186737 | -1.32655510723615 | 1.64709273632836  |
| H | -4.47575395502405 | 0.38948958745876  | 1.40855112932135  |
| C | -2.38160954614782 | -2.28098812180410 | 1.83296248171404  |
| H | -3.15259827454991 | -2.72955052297928 | 2.45947957608053  |
| H | -2.42980279942530 | -2.73585803966516 | 0.84589774996464  |
| H | -1.41043255780378 | -2.51304329858494 | 2.25822118886125  |
| C | -1.34761320685732 | 1.60254372400797  | -0.97783466738736 |
| H | -0.37965316360998 | 1.26210720802252  | -1.31886670968879 |
| H | -2.11730756192673 | 1.05966643318358  | -1.52650715105267 |
| H | -1.44978926789099 | 2.65976660340636  | -1.22391813545752 |
| C | -2.55898106238807 | -0.24073607739843 | 3.20811583256095  |
| H | -1.58000134540916 | -0.45390820263910 | 3.63540977723563  |
| H | -2.73396023834739 | 0.82814612049952  | 3.28450585195761  |
| H | -3.31043518148200 | -0.74254084586172 | 3.81792410948487  |
| H | 1.05536888970824  | -1.07319493287966 | -0.16893432603380 |

**TS for di-*tert*-butyliminoxyl addition to styrene**

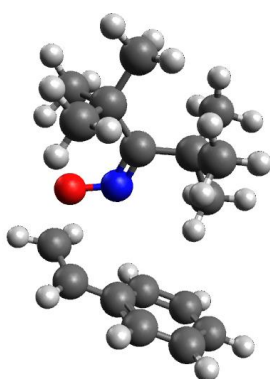

imaginary frequencies: 1

Electronic energy ... -793.83980804 Eh

Total Enthalpy ... -793.42459572 Eh

Final Gibbs free energy ... -793.49269612 Eh

|   |                   |                   |                   |
|---|-------------------|-------------------|-------------------|
| C | -3.66271600407402 | -0.84998066099842 | -1.04488687102718 |
| C | -2.98588050753169 | 0.35553066457654  | -1.04682176657616 |
| C | -2.67810491628565 | 1.00570290416357  | 0.15682056622625  |
| C | -3.08458356345800 | 0.40614131158547  | 1.35738465508223  |
| C | -3.74870840193772 | -0.80826109159506 | 1.35778871593744  |
| C | -4.04179564388259 | -1.44119991319364 | 0.15563229204840  |
| H | -3.89477417744447 | -1.33550646324719 | -1.98230975634805 |
| H | -2.70130610137363 | 0.80265233621936  | -1.98792805347662 |
| H | -2.85763301075128 | 0.90047512792803  | 2.29258833985503  |
| H | -4.04170595156100 | -1.26145713885040 | 2.29433857952276  |
| H | -4.56613274020837 | -2.38628226276593 | 0.15329102610570  |
| C | -1.95554422482956 | 2.25778580956688  | 0.20602155316329  |
| H | -1.96830059500705 | 2.78445499456496  | 1.15193611253124  |
| C | -1.12694785915131 | 2.72146378448635  | -0.78535127700739 |
| H | -1.15732087185735 | 2.29323666877000  | -1.77507316700949 |
| H | -0.72894271878325 | 3.72184121068316  | -0.71676824781950 |
| O | 0.59392757500429  | 1.93351643523456  | -0.33361937685401 |
| N | 0.50824930668371  | 0.62085607115011  | -0.40990716988521 |
| C | 1.52549458781993  | -0.12124378549756 | -0.17395740575078 |

|   |                   |                   |                   |
|---|-------------------|-------------------|-------------------|
| C | 2.89303722664485  | 0.48479818573644  | 0.20881277383320  |
| C | 1.20161139240387  | -1.62611832686628 | -0.19578772448551 |
| C | 2.12887589808107  | -2.42472589836081 | -1.12737415702611 |
| H | 3.11977833256992  | -2.57956918973875 | -0.71811622643315 |
| H | 1.69152251158600  | -3.40813962559807 | -1.29839033103586 |
| H | 2.22797940413417  | -1.93121276071632 | -2.09436862439525 |
| C | 1.26761093825511  | -2.18314191094539 | 1.23639167869502  |
| H | 0.54220770229042  | -1.67335239258908 | 1.87035017218713  |
| H | 1.01845947371219  | -3.24467732660521 | 1.22371967419518  |
| H | 2.24721821487629  | -2.07876347741726 | 1.69283811821550  |
| C | -0.22896542999335 | -1.86437723943237 | -0.69277422403003 |
| H | -0.36584326240437 | -1.50012995193322 | -1.70937705486737 |
| H | -0.42253964685366 | -2.93714158091116 | -0.68339023805263 |
| H | -0.96543556410384 | -1.37443834358191 | -0.06384553813901 |
| C | 4.06662906532778  | -0.50016060017225 | 0.29113243882647  |
| H | 3.88921398464810  | -1.34001512712182 | 0.95412285619839  |
| H | 4.34316749583973  | -0.88039370139208 | -0.68881133588982 |
| H | 4.92450723128873  | 0.04669161635182  | 0.68224579177114  |
| C | 2.74439342146681  | 1.13945795939543  | 1.59373496832632  |
| H | 3.66876387286958  | 1.65693734359277  | 1.85196075007395  |
| H | 1.93110443972018  | 1.85972889397008  | 1.61078185837787  |
| H | 2.55712911454725  | 0.38401840110817  | 2.35600739717701  |
| C | 3.32166517905645  | 1.53678643683315  | -0.83075004155027 |
| H | 2.65480916249512  | 2.39047235496369  | -0.86438380692774 |
| H | 4.32082785821874  | 1.89265912224981  | -0.57851472611152 |
| H | 3.36571280195185  | 1.09284713639984  | -1.82544219765090 |

**Adduct of di-*tert*-butyliminoxyl to styrene**

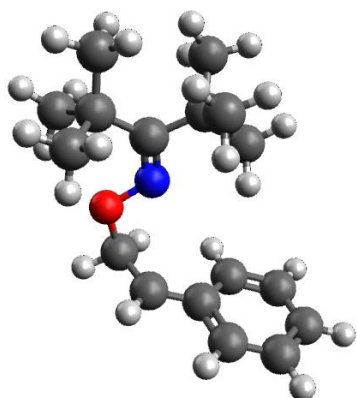

imaginary frequencies: no

Electronic energy ... -793.87312573 Eh

Total Enthalpy ... -793.45538211 Eh

Final Gibbs free energy ... -793.52372926 Eh

|   |                   |                   |                   |
|---|-------------------|-------------------|-------------------|
| C | -4.00843628285750 | -0.76270898194489 | -0.93066117141551 |
| C | -3.00779823294097 | 0.18548701964832  | -0.87337483505520 |
| C | -2.76326580864179 | 0.91605391886993  | 0.31527953735155  |
| C | -3.58813166361845 | 0.62973418326335  | 1.43259116238923  |
| C | -4.58374004409966 | -0.32157883683570 | 1.36475251855712  |
| C | -4.80377701762618 | -1.02690509703730 | 0.18272596502758  |
| H | -4.17128011267596 | -1.30989545699215 | -1.84891436303592 |
| H | -2.39322456227871 | 0.35659333850403  | -1.74359696986913 |
| H | -3.42095895898938 | 1.17398544206753  | 2.35252001789745  |
| H | -5.19523610632177 | -0.52139968299137 | 2.23370221822860  |
| H | -5.58315981530219 | -1.77346885728888 | 0.13052890836321  |
| C | -1.74965500637694 | 1.88860488110926  | 0.43648930982972  |
| H | -1.62343353883893 | 2.35745377810460  | 1.40424726365604  |
| C | -0.78916179819391 | 2.29106479494611  | -0.62487373914419 |
| H | -1.09366570750470 | 1.95609756921725  | -1.61378447096007 |
| H | -0.67790837672744 | 3.37435029244241  | -0.64742386105666 |
| O | 0.54591064526445  | 1.81884125268262  | -0.36188717788244 |
| N | 0.53356659646752  | 0.43012772122026  | -0.47311140254184 |
| C | 1.62919688663852  | -0.17595028302356 | -0.22960115277743 |



|   |                   |                   |                   |
|---|-------------------|-------------------|-------------------|
| C | 2.93650389002088  | 0.54346598385991  | 0.16756607161500  |
| C | 1.44878026635471  | -1.70847366114426 | -0.27805225953554 |
| C | 2.47295304321236  | -2.40413440864187 | -1.19089454418651 |
| H | 3.45297274825422  | -2.50076221907496 | -0.74033319925372 |
| H | 2.11750195240933  | -3.41010909754450 | -1.41106795382262 |
| H | 2.57811218723804  | -1.87369952346531 | -2.13737094750573 |
| C | 1.52943581866575  | -2.26432141230429 | 1.15356744612675  |
| H | 0.74190726982934  | -1.82999582738749 | 1.76888071082970  |
| H | 1.38278814298972  | -3.34435963794008 | 1.12883168529187  |
| H | 2.48216874051044  | -2.06977030115545 | 1.63645318856438  |
| C | 0.05926155553922  | -2.08306362519839 | -0.81603086646738 |
| H | -0.08188449018309 | -1.73205331776557 | -1.83684991813595 |
| H | -0.02403856470925 | -3.16977276372069 | -0.81173813497263 |
| H | -0.74091981631962 | -1.67266291788931 | -0.20757523981889 |
| C | 4.18618322935414  | -0.34471683300955 | 0.26278193269242  |
| H | 4.06967184820786  | -1.19843289476309 | 0.92127262249070  |
| H | 4.50963313329674  | -0.69506076903059 | -0.71364330064119 |
| H | 4.98794454588342  | 0.27129041816082  | 0.66917239964950  |
| C | 2.73104381596141  | 1.17886110423666  | 1.55480137530974  |
| H | 3.61280968087119  | 1.76572135614451  | 1.81304899868247  |
| H | 1.86333311209247  | 1.82989654910505  | 1.57780021101534  |
| H | 2.60967847333720  | 0.40613307552613  | 2.31333558921515  |
| C | 3.29536759924758  | 1.62190725940811  | -0.87381095653141 |
| H | 2.59272352742216  | 2.44447843807623  | -0.88782837917755 |
| H | 4.28472292762136  | 2.01403586510432  | -0.63815666232698 |
| H | 3.33970103151641  | 1.18526266845185  | -1.87176647566903 |

## Cyclopentene

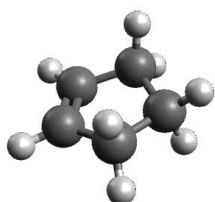

imaginary frequencies: no

Electronic energy ... -195.45534040 Eh

Total Enthalpy ... -195.33276800 Eh

Final Gibbs free energy ... -195.36569652 Eh

|   |                   |                   |                   |
|---|-------------------|-------------------|-------------------|
| H | -0.10059251039296 | 0.36278871643851  | -0.01771234973230 |
| C | -0.06603036851488 | 0.14985137861258  | 1.05054143204981  |
| C | 0.95842185709363  | 0.98200064979877  | 1.77989327688274  |
| C | 0.47405116603016  | 1.49117210141289  | 2.90577724813819  |
| C | -0.96240425581040 | 1.09270093124594  | 3.13351269116512  |
| C | -1.38254540444644 | 0.51352327129654  | 1.76715376951645  |
| H | 0.17185926636185  | -0.91274768051049 | 1.15014132859199  |
| H | 1.97499743432533  | 1.10177238396492  | 1.43120624909763  |
| H | 1.03786447004863  | 2.08686182404278  | 3.61038548471295  |
| H | -1.58956980645485 | 1.92874546435003  | 3.44228275578921  |
| H | -1.02415881835795 | 0.34533198231130  | 3.92917858687129  |
| H | -1.90044484981350 | 1.28300048498679  | 1.19571291629704  |
| H | -2.05680318006861 | -0.33471250795056 | 1.86106261061986  |

### TS for addition of diacetyliminoxyl to cyclopentene

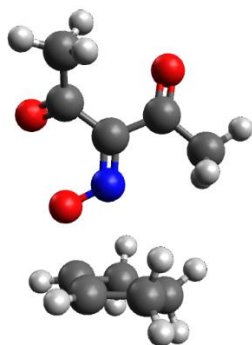

imaginary frequencies: 1

Electronic energy ... -670.22775512 Eh

Total Enthalpy ... -669.98677397 Eh

Final Gibbs free energy ... -670.04525127 Eh

|   |                   |                   |                   |
|---|-------------------|-------------------|-------------------|
| O | 0.43026215375998  | -1.34978254293341 | -0.18082620049352 |
| N | -0.01333978734951 | -0.14890555789693 | -0.16457624017508 |
| C | -1.28687497913156 | 0.07417952638345  | -0.13680389154223 |
| C | -1.68084791290992 | 1.50534705139803  | -0.15298552095676 |
| C | -2.32053495580141 | -1.02036253613068 | -0.10234994773467 |
| C | -0.59841488348303 | 2.54593414206579  | -0.05541211066837 |
| H | -0.02536865879545 | 2.41168628442962  | 0.85983275941107  |
| H | 0.09707360667600  | 2.44524697401639  | -0.88608993227134 |
| H | -1.05735870371900 | 3.52926080278817  | -0.07172995876548 |
| C | -3.51858892881544 | -0.84206028618265 | 0.78798954731264  |
| H | -3.28094647783659 | -0.24749668218735 | 1.66659561140599  |
| H | -4.29238296325510 | -0.31441220761623 | 0.23329306024834  |
| H | -3.88905419659866 | -1.82255929614770 | 1.07439654339829  |
| O | -2.85381100252981 | 1.81305947944111  | -0.26386400064408 |
| O | -2.16097990930798 | -2.02871556392489 | -0.75627080539720 |
| C | 2.66162643049187  | -0.95599656771408 | 1.04740385056028  |
| C | 2.85962421419071  | 0.51047343335713  | 1.18912789590453  |
| C | 2.39931356735224  | -1.30434747811453 | -0.26405027834384 |
| H | 2.62193567486059  | -1.64484719048897 | 1.87759862050540  |
| C | 3.11793248903660  | 1.00485958248823  | -0.24896183011005 |
| H | 3.66374509805995  | 0.75572282783788  | 1.88324186729469  |
| H | 1.94807217043172  | 0.95256079855105  | 1.60878537287039  |
| C | 2.69857609732847  | -0.15434677164288 | -1.18162112736708 |
| H | 2.39575469577086  | -2.32532226108206 | -0.61173288221793 |
| H | 2.56396506825217  | 1.91371576117841  | -0.46551340347710 |
| H | 4.17473869396790  | 1.22718161096163  | -0.37915486860235 |
| H | 1.82434311847075  | 0.09445313139231  | -1.78208157173705 |
| H | 3.48981828088363  | -0.43320446422684 | -1.87671955840749 |

## Adduct of diacetylliminoxyl to cyclopentene

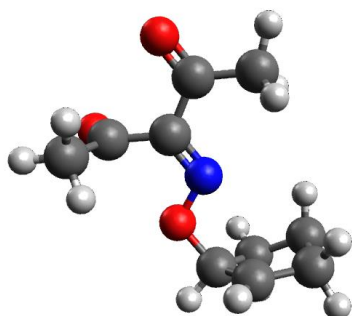

imaginary frequencies: no

Electronic energy ... -670.25181360 Eh

Total Enthalpy ... -670.00908299 Eh

Final Gibbs free energy ... -670.06790452 Eh

|   |                   |                   |                   |
|---|-------------------|-------------------|-------------------|
| O | 0.30505106875483  | -1.07695687309565 | -0.15293233480835 |
| N | -0.05353672445357 | 0.23515298595179  | -0.08001260536161 |
| C | -1.29912149239869 | 0.40761422556938  | -0.26557938006827 |
| C | -1.83947461664696 | 1.79788457263608  | -0.19688177140217 |
| C | -2.27168256745938 | -0.72322098892859 | -0.54548480040212 |
| C | -0.88328540708311 | 2.92750744267057  | 0.03665148223021  |
| H | -0.36863962993635 | 2.78545304158576  | 0.98541072518060  |
| H | -0.12311178661044 | 2.93960076019313  | -0.74237366884549 |
| H | -1.43173065071602 | 3.86364824573614  | 0.04445737891111  |
| C | -2.83980715969526 | -1.41303864177002 | 0.65214405608588  |
| H | -2.02465594091971 | -1.78339134997676 | 1.27342120496183  |
| H | -3.39548457784167 | -0.68508459845189 | 1.24464360801434  |
| H | -3.49070729547719 | -2.22729065343632 | 0.34943808591363  |
| O | -3.03657167572237 | 1.95336177339258  | -0.32495166097962 |
| O | -2.54515439188327 | -1.00000187198886 | -1.68847686740450 |
| C | 2.19089009668850  | -0.60298252866219 | 1.34948786697248  |
| C | 3.12232100808119  | 0.53033218382249  | 1.10347373744308  |
| C | 1.74710188697013  | -1.24045727210601 | 0.08743143673648  |
| H | 1.86925281741833  | -0.93602435169010 | 2.32408396707491  |
| C | 3.04786428688792  | 0.76508479198686  | -0.41673446337621 |
| H | 4.14217276605618  | 0.26323714838540  | 1.40802284909285  |

|   |                  |                   |                   |
|---|------------------|-------------------|-------------------|
| H | 2.86085600704812 | 1.41872726733716  | 1.68256011745861  |
| C | 2.61038404096099 | -0.58853444879296 | -0.99475729902433 |
| H | 1.82395933529898 | -2.32641817974271 | 0.09048258475606  |
| H | 2.29917778028559 | 1.52324911354466  | -0.63385515245591 |
| H | 3.99492150118268 | 1.10116175155564  | -0.83262888136279 |
| H | 2.07714668003263 | -0.50934322762284 | -1.93965561646702 |
| H | 3.47998564117796 | -1.22554231810277 | -1.15771559887368 |

### TS for allylic hydrogen atom abstraction from cyclopentene by diacetyliminoxyl

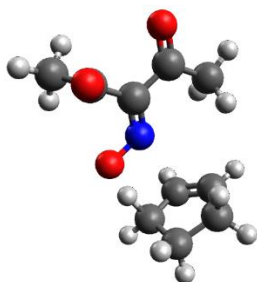

imaginary frequencies: 1

|                         |     |                  |
|-------------------------|-----|------------------|
| Electronic energy       | ... | -670.22219104 Eh |
| Total Enthalpy          | ... | -669.98583360 Eh |
| Final Gibbs free energy | ... | -670.04579697 Eh |

|   |                   |                   |                   |
|---|-------------------|-------------------|-------------------|
| O | 0.19051881492244  | -1.49503530895391 | -0.23064878040731 |
| N | -0.12422618271396 | -0.23982552606205 | -0.23134043198410 |
| C | -1.34344460379876 | 0.07733006762132  | -0.00000773252514 |
| C | -1.72140893821343 | 1.51099178173488  | -0.01001812176930 |
| C | -2.41570321133336 | -0.95681980074297 | 0.27884769552624  |
| C | -0.64204677100795 | 2.53778042942807  | -0.19037384432065 |
| H | 0.07339441432169  | 2.46828975666087  | 0.62748854595558  |
| H | -0.09332209243923 | 2.35117209301401  | -1.11099127115483 |
| H | -1.09153740049613 | 3.52527620162976  | -0.21152460638753 |
| C | -2.99296592038148 | -1.64710990130313 | -0.91595648740010 |
| H | -3.50714524876821 | -0.90325723883271 | -1.52672400112261 |
| H | -2.18889277221078 | -2.06318436957989 | -1.52202370245762 |

|   |                   |                   |                   |
|---|-------------------|-------------------|-------------------|
| H | -3.68614811994500 | -2.42525909918482 | -0.61188500159294 |
| O | -2.89447817713779 | 1.80402889970416  | 0.12593806343990  |
| O | -2.75841657063619 | -1.17195470245061 | 1.41760065167061  |
| H | 1.54162126206581  | -1.45626437293429 | -0.49706851120203 |
| C | 2.73259886374039  | -1.15886490904818 | -0.59729748069884 |
| C | 3.23657643120121  | -0.96028801648239 | 0.82894657302239  |
| C | 2.68688017578407  | 0.16253467706024  | -1.19867908548144 |
| H | 3.12679953877619  | -1.98868870458799 | -1.17803333933043 |
| C | 3.00432584356873  | 0.53779718652383  | 1.10636916784849  |
| H | 4.30164067110315  | -1.19124720701894 | 0.87128118707080  |
| H | 2.73510007007128  | -1.60689334092925 | 1.54527606732295  |
| C | 2.81207608305344  | 1.12204610477072  | -0.25907285467445 |
| H | 2.51311425615092  | 0.34392790934115  | -2.24886564887505 |
| H | 2.10719320975814  | 0.70482331772007  | 1.70822046681015  |
| H | 3.82967792870860  | 1.00488513811318  | 1.64316221660045  |
| H | 2.76654444585620  | 2.18411993478885  | -0.45060973388322 |

### Cyclopent-2-en-1-yl radical

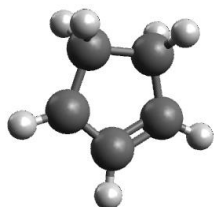

imaginary frequencies: no

Electronic energy ... -194.81246607 Eh

Total Enthalpy ... -194.70402738 Eh

Final Gibbs free energy ... -194.73770623 Eh

|   |                  |                   |                   |
|---|------------------|-------------------|-------------------|
| C | 3.01249392922390 | -1.08834925416119 | -0.65799288234626 |
| C | 3.25657331490488 | -0.95470829580557 | 0.81865805773622  |
| C | 2.73291946300559 | 0.14733873557959  | -1.21243386268792 |
| H | 3.06101814195659 | -2.02264614596484 | -1.19521939732767 |

|   |                  |                   |                   |
|---|------------------|-------------------|-------------------|
| C | 3.05204039048020 | 0.55501986292088  | 1.09964062991537  |
| H | 4.26354236720548 | -1.28301527632976 | 1.08616621675526  |
| H | 2.57144897913222 | -1.57541707632556 | 1.39943141389304  |
| C | 2.74734851319064 | 1.14048593837548  | -0.25039777667894 |
| H | 2.52931891610873 | 0.31519242227681  | -2.26050230541433 |
| H | 2.23398762387593 | 0.72814828358292  | 1.80253215378918  |
| H | 3.93705789031097 | 1.01185966602138  | 1.54688826793722  |
| H | 2.55939847060486 | 2.18837413982988  | -0.42517851557117 |

## References

- (1) Ebner, C.; Müller, C. A.; Markert, C.; Pfaltz, A. Determining the Enantioselectivity of Chiral Catalysts by Mass Spectrometric Screening of Their Racemic Forms. *J. Am. Chem. Soc.* **2011**, *133* (13), 4710–4713. <https://doi.org/10.1021/ja111700e>.
- (2) Levin, V. V.; Dilman, A. D. One-Pot Synthesis of  $\alpha$ -Trifluoromethylstyrenes from Aryl Ketones and the Ruppert–Prakash Reagent. *Mendeleev Commun.* **2021**, *31* (5), 684–685. <https://doi.org/10.1016/j.mencom.2021.09.030>.
- (3) Petrova, L. A.; Borisov, A. P.; Aleshin, V. V.; Makhaev, V. D. Solid-Phase Synthesis of Copper (II) Beta-Diketonates upon Mechanical Activation. *Russ. J. Inorg. Chem.* **2001**, *46* (10), 1501–1506.
- (4) Krylov, I. B.; Paveliev, S. A.; Shelimov, B. N.; Lokshin, B. V.; Garbuzova, I. A.; Tafeenko, V. A.; Chernyshev, V. V.; Budnikov, A. S.; Nikishin, G. I.; Terent'ev, A. O. Selective Cross-Dehydrogenative C–O Coupling of N-Hydroxy Compounds with Pyrazolones. Introduction of the Diacetylinoxyl Radical into the Practice of Organic Synthesis. *Org. Chem. Front.* **2017**, *4* (10), 1947–1957. <https://doi.org/10.1039/C7QO00447H>.
- (5) Bruker. APEX-III. Bruker AXS Inc., Madison, Wisconsin, USA, 2019.
- (6) Krause, L.; Herbst-Irmer, R.; Sheldrick, G. M.; Stalke, D. Comparison of Silver and Molybdenum Microfocus X-Ray Sources for Single-Crystal Structure Determination. *J. Appl. Crystallogr.* **2015**, *48* (1), 3–10. <https://doi.org/10.1107/S1600576714022985>.
- (7) Sheldrick, G. M. *SHELXT* – Integrated Space-Group and Crystal-Structure Determination. *Acta Crystallogr. Sect. Found. Adv.* **2015**, *71* (1), 3–8. <https://doi.org/10.1107/S2053273314026370>.
- (8) Sheldrick, G. M. Crystal Structure Refinement with *SHELXL*. *Acta Crystallogr. Sect. C Struct. Chem.* **2015**, *71* (1), 3–8. <https://doi.org/10.1107/S2053229614024218>.
- (9) Neese, F. Software Update: The ORCA Program System—Version 5.0. *WIREs Comput. Mol. Sci.* **2022**, *12* (5). <https://doi.org/10.1002/wcms.1606>.
- (10) Mardirossian, N.; Head-Gordon, M. Mapping the Genome of Meta-Generalized Gradient Approximation Density Functionals: The Search for B97M-V. *J. Chem. Phys.* **2015**, *142* (7), 074111. <https://doi.org/10.1063/1.4907719>.
- (11) Mardirossian, N.; Head-Gordon, M.  $\omega$  B97M-V: A Combinatorially Optimized, Range-Separated Hybrid, Meta-GGA Density Functional with VV10 Nonlocal Correlation. *J. Chem. Phys.* **2016**, *144* (21), 214110. <https://doi.org/10.1063/1.4952647>.

- (12) Najibi, A.; Goerigk, L. DFT -D4 Counterparts of Leading META- Generalized-gradient Approximation and Hybrid Density Functionals for Energetics and Geometries. *J. Comput. Chem.* **2020**, *41* (30), 2562–2572. <https://doi.org/10.1002/jcc.26411>.
- (13) Caldeweyher, E.; Bannwarth, C.; Grimme, S. Extension of the D3 Dispersion Coefficient Model. *J. Chem. Phys.* **2017**, *147* (3), 034112. <https://doi.org/10.1063/1.4993215>.
- (14) Caldeweyher, E.; Ehlert, S.; Hansen, A.; Neugebauer, H.; Spicher, S.; Bannwarth, C.; Grimme, S. A Generally Applicable Atomic-Charge Dependent London Dispersion Correction. *J. Chem. Phys.* **2019**, *150* (15), 154122. <https://doi.org/10.1063/1.5090222>.
- (15) Weigend, F.; Ahlrichs, R. Balanced Basis Sets of Split Valence, Triple Zeta Valence and Quadruple Zeta Valence Quality for H to Rn: Design and Assessment of Accuracy. *Phys. Chem. Chem. Phys.* **2005**, *7* (18), 3297. <https://doi.org/10.1039/b508541a>.
- (16) Weigend, F. Accurate Coulomb-Fitting Basis Sets for H to Rn. *Phys. Chem. Chem. Phys.* **2006**, *8* (9), 1057. <https://doi.org/10.1039/b515623h>.
- (17) Hanwell, M. D.; Curtis, D. E.; Lonie, D. C.; Vandermeersch, T.; Zurek, E.; Hutchison, G. R. Avogadro: An Advanced Semantic Chemical Editor, Visualization, and Analysis Platform. *J. Cheminformatics* **2012**, *4* (1), 17. <https://doi.org/10.1186/1758-2946-4-17>.



## The $^1\text{H}$ and $^{13}\text{C}$ spectra of synthesized compounds

7.37  
7.36  
7.36  
7.34  
7.32  
7.32  
7.30  
7.29  
7.28  
7.27  
7.27  
7.26

4.62

2.35  
2.28  
2.26  
2.14  
1.78

**<sup>1</sup>H NMR (300.13 MHz, CDCl<sub>3</sub>)**

**3,3'-(((2-Phenylpropane-1,2-diyloxy)bis(azanylylidene))bis(pentane-2,4-dione) 3a**

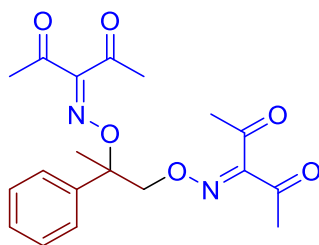

| Parameter                 | Value              |
|---------------------------|--------------------|
| 1 Title                   | i6725-1-{1H}.1.fid |
| 2 Solvent                 | CDCl3              |
| 3 Temperature             | 300.0              |
| 4 Pulse Sequence          | zg                 |
| 5 Number of Scans         | 1                  |
| 6 Receiver Gain           | 32.1               |
| 7 Relaxation Delay        | 0.1000             |
| 8 Pulse Width             | 15.0000            |
| 9 Acquisition Time        | 2.7150             |
| 10 Spectrometer Frequency | 300.13             |
| 11 Spectral Width         | 6009.6             |
| 12 Lowest Frequency       | -911.1             |
| 13 Nucleus                | 1H                 |
| 14 Acquired Size          | 16316              |
| 15 Spectral Size          | 65536              |

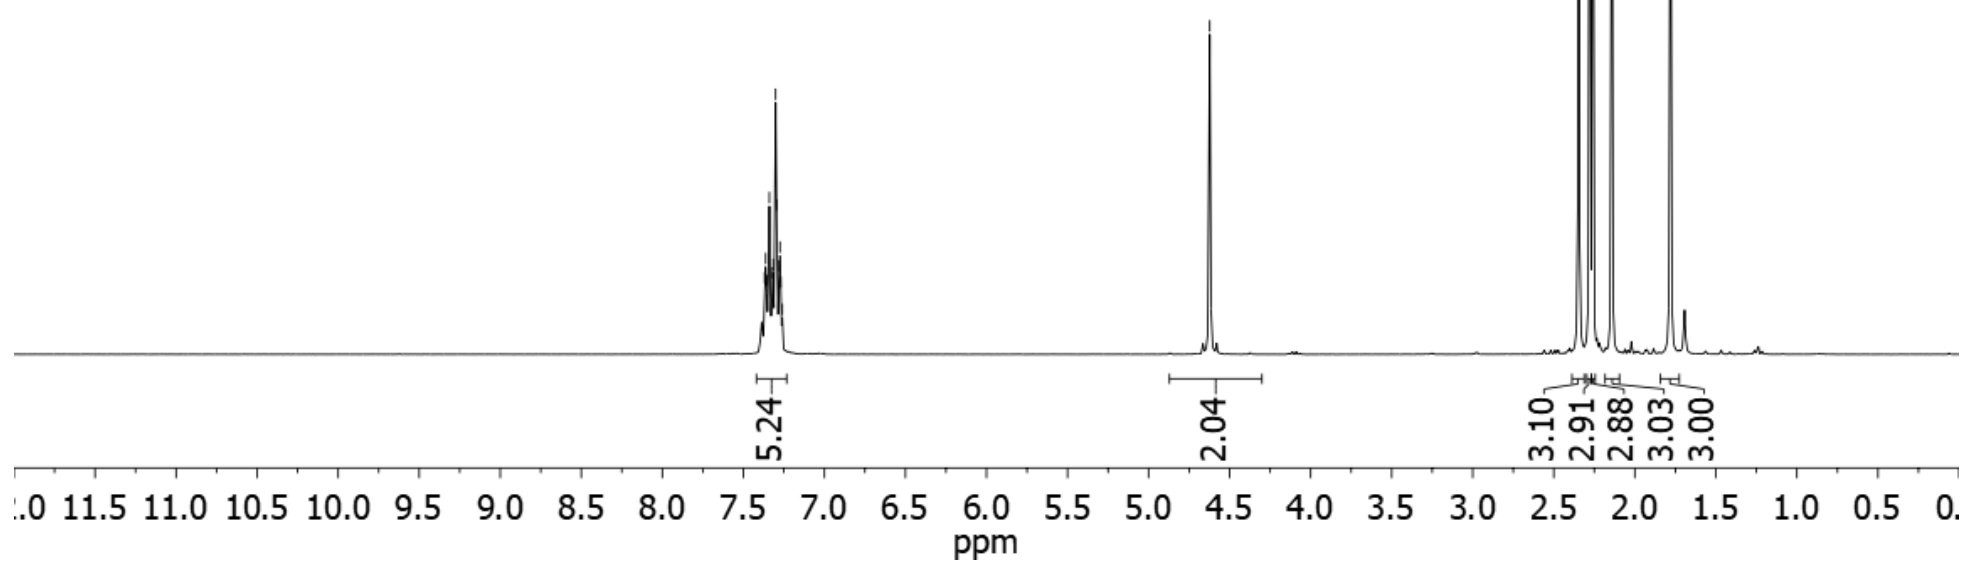

198.47  
197.99  
194.25  
194.09

156.55  
156.04

140.58  
128.64  
128.22  
125.85

86.51  
81.26  
77.58  
77.16  
76.74

30.58  
30.33  
25.70  
25.52  
22.29

**<sup>13</sup>C NMR (75.47 MHz, CDCl<sub>3</sub>)**  
**3,3'-(((2-Phenylpropane-1,2-diyl)bis(oxy))bis(azanylidene))bis(pentane-2,4-dione) 3a**

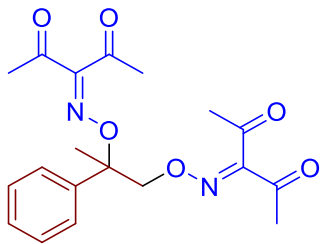

| Parameter                 | Value                          |
|---------------------------|--------------------------------|
| 1 Title                   | i6725-1- <sup>13</sup> C-2.fid |
| 2 Solvent                 | CDCl <sub>3</sub>              |
| 3 Temperature             | 300.0                          |
| 4 Pulse Sequence          | zgpg30                         |
| 5 Number of Scans         | 110                            |
| 6 Receiver Gain           | 214.2                          |
| 7 Relaxation Delay        | 0.8000                         |
| 8 Pulse Width             | 9.0000                         |
| 9 Acquisition Time        | 0.9050                         |
| 10 Spectrometer Frequency | 75.48                          |
| 11 Spectral Width         | 18028.8                        |
| 12 Lowest Frequency       | -1462.0                        |
| 13 Nucleus                | <sup>13</sup> C                |
| 14 Acquired Size          | 16316                          |
| 15 Spectral Size          | 65536                          |

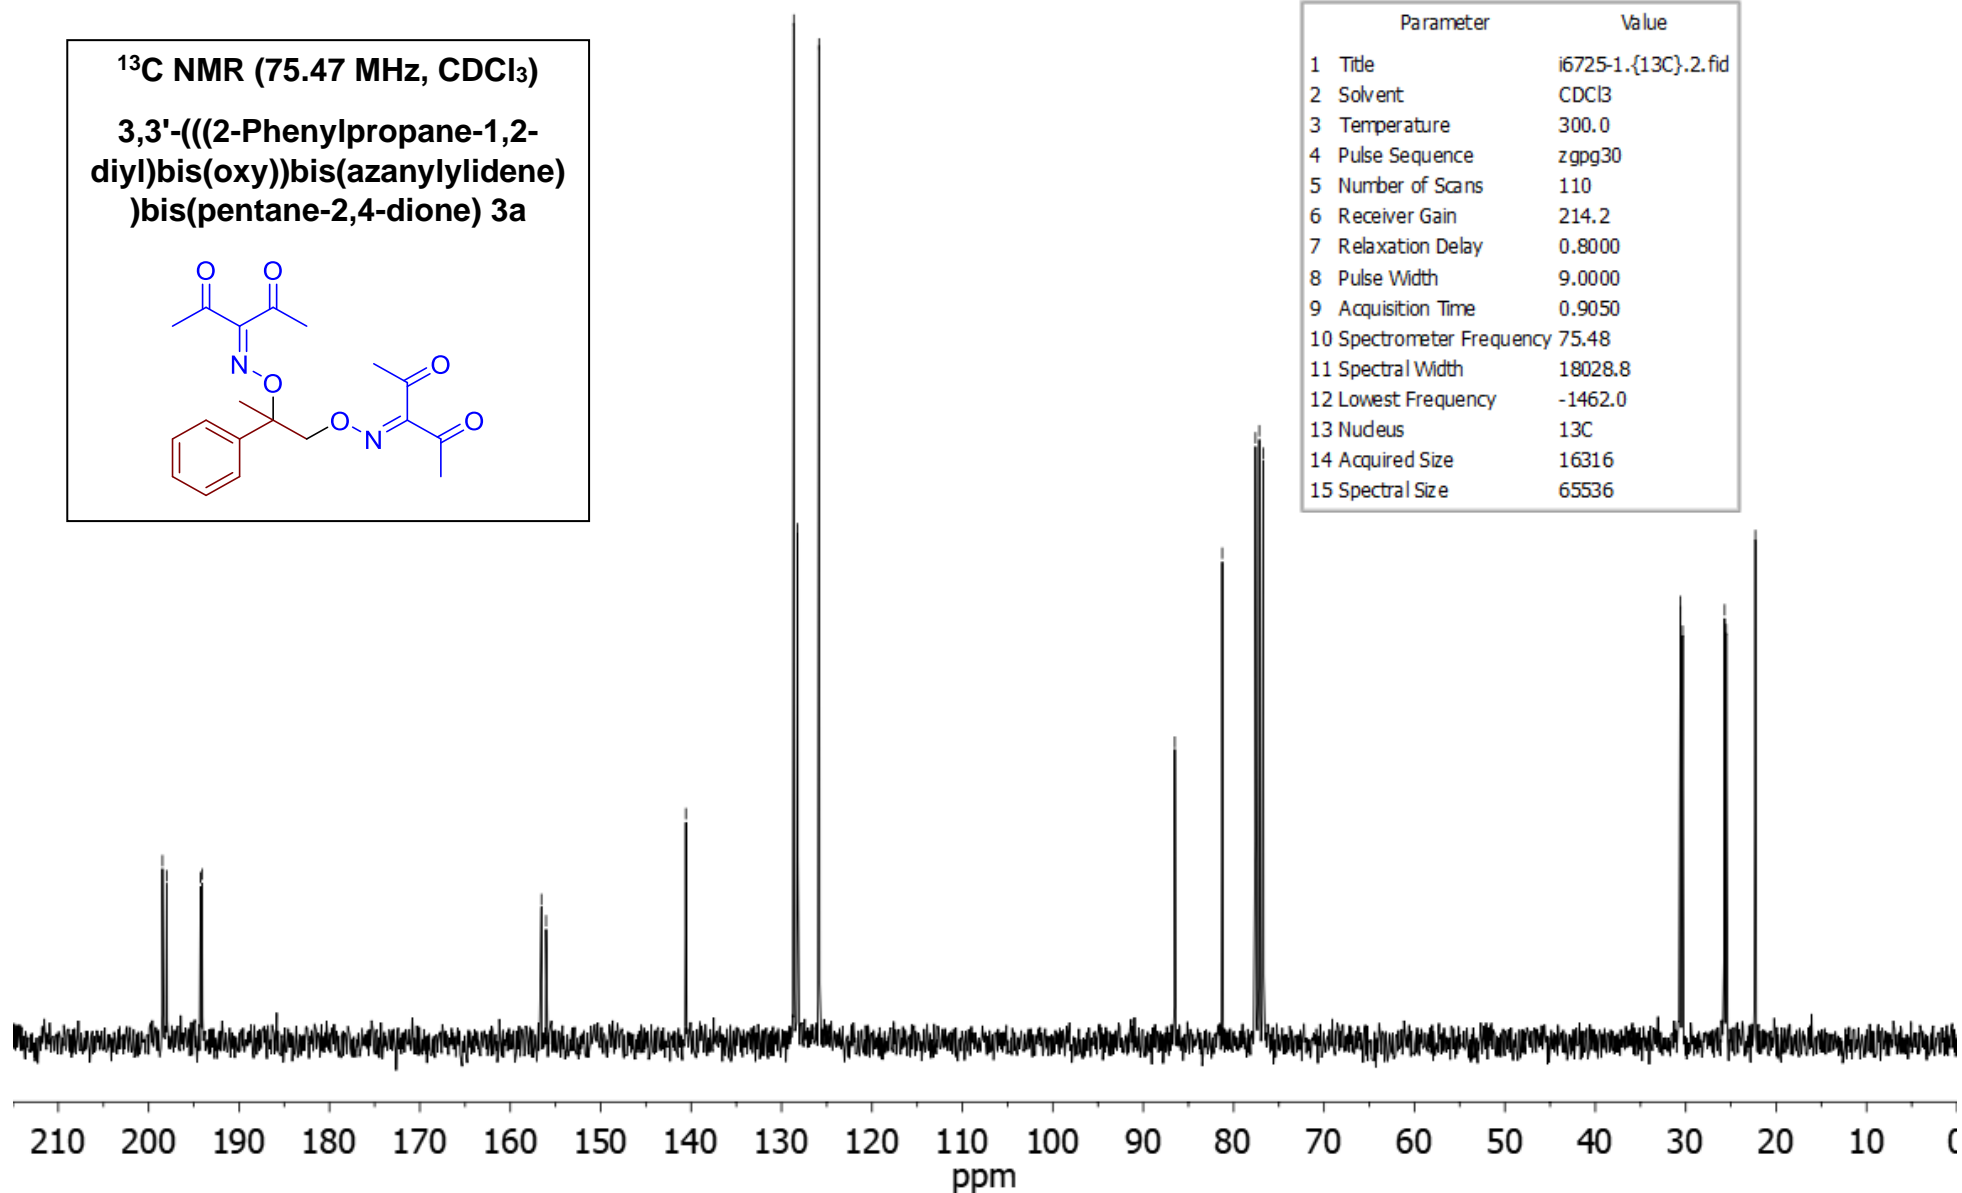

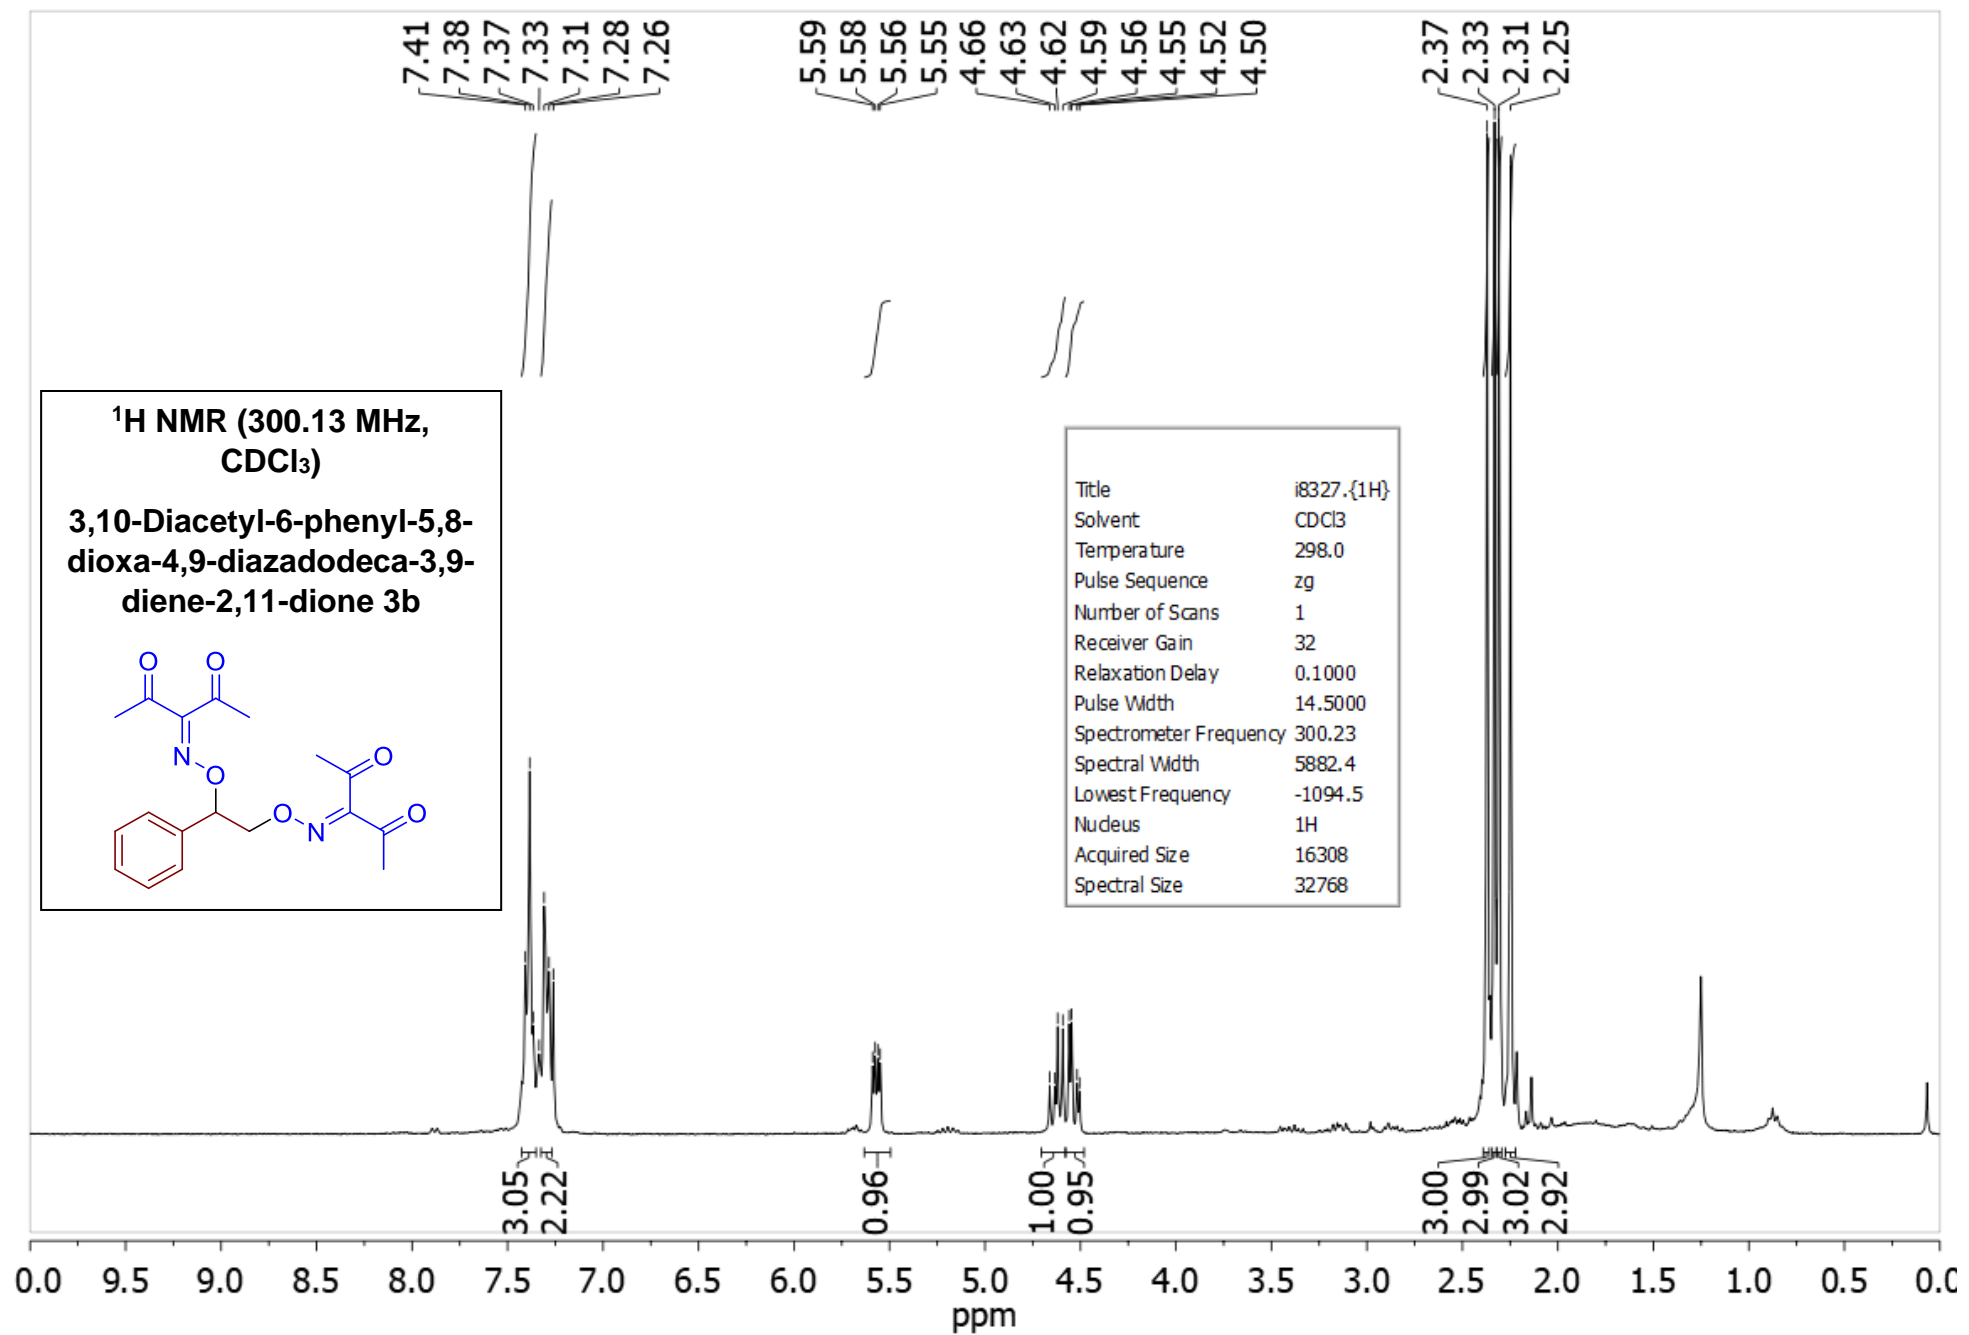

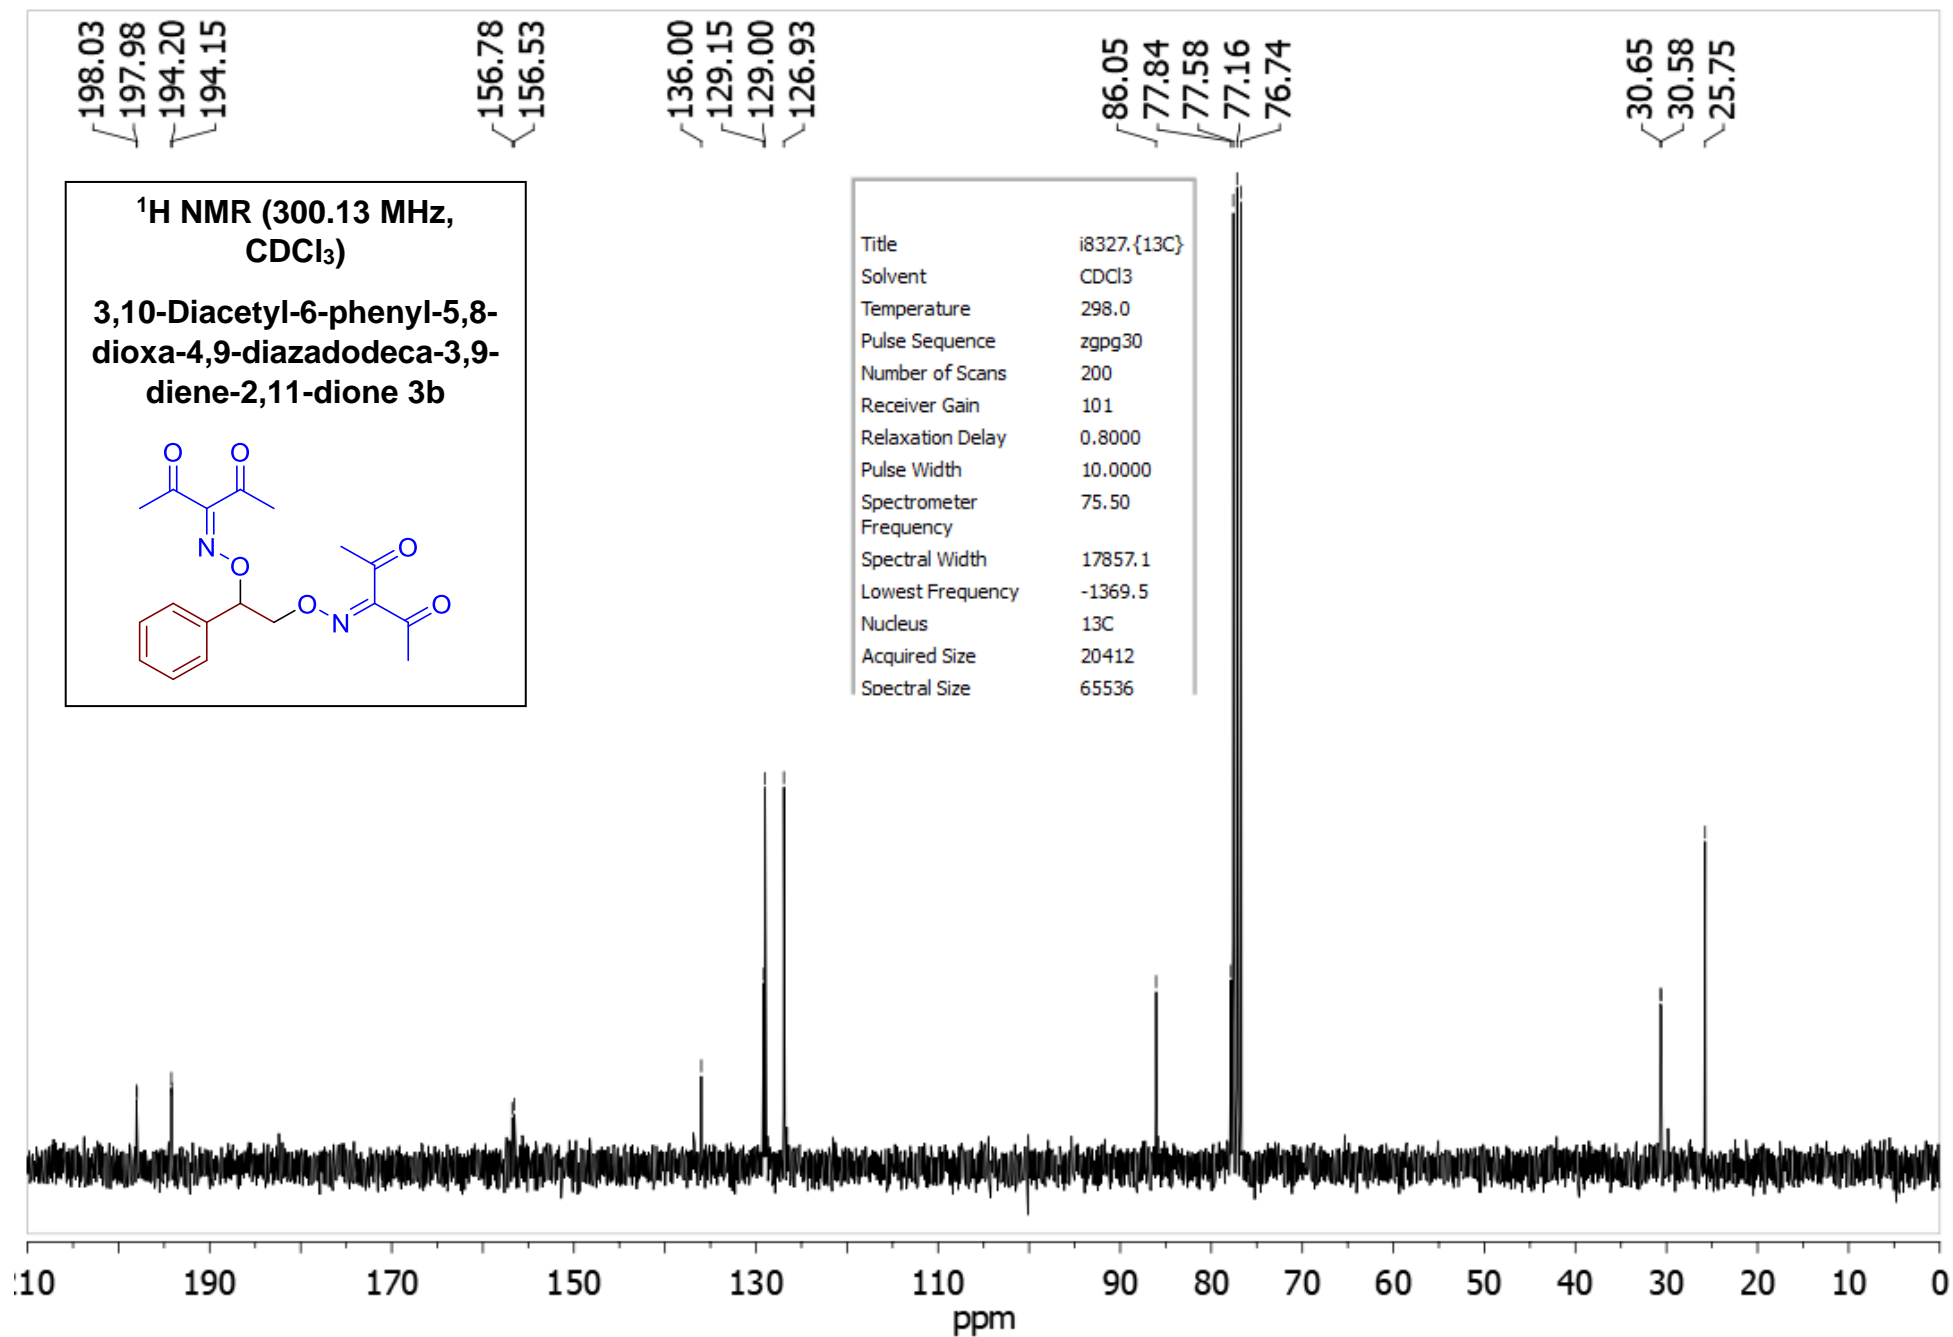

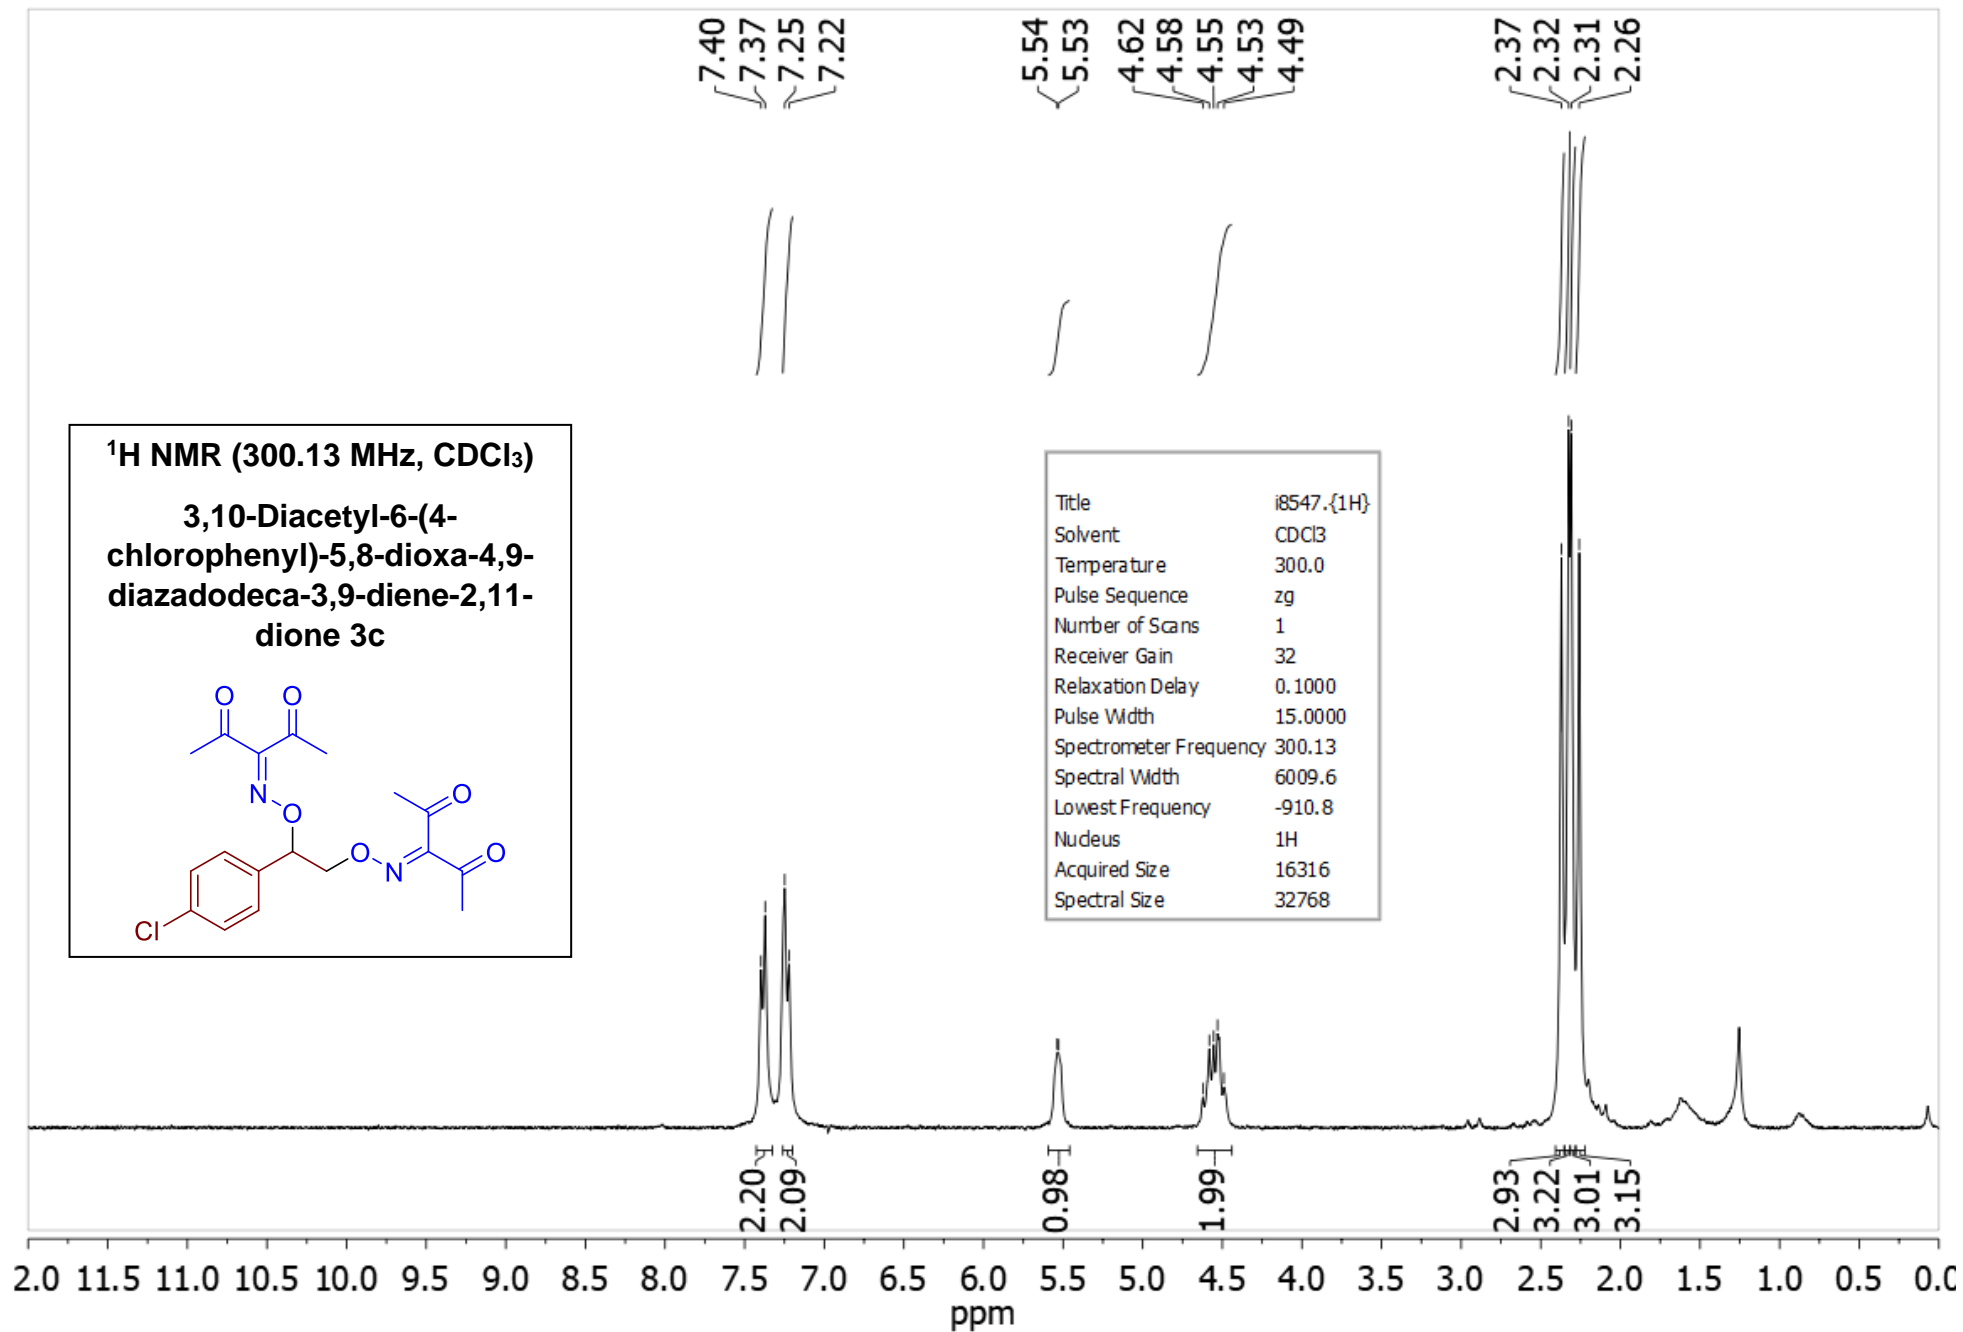

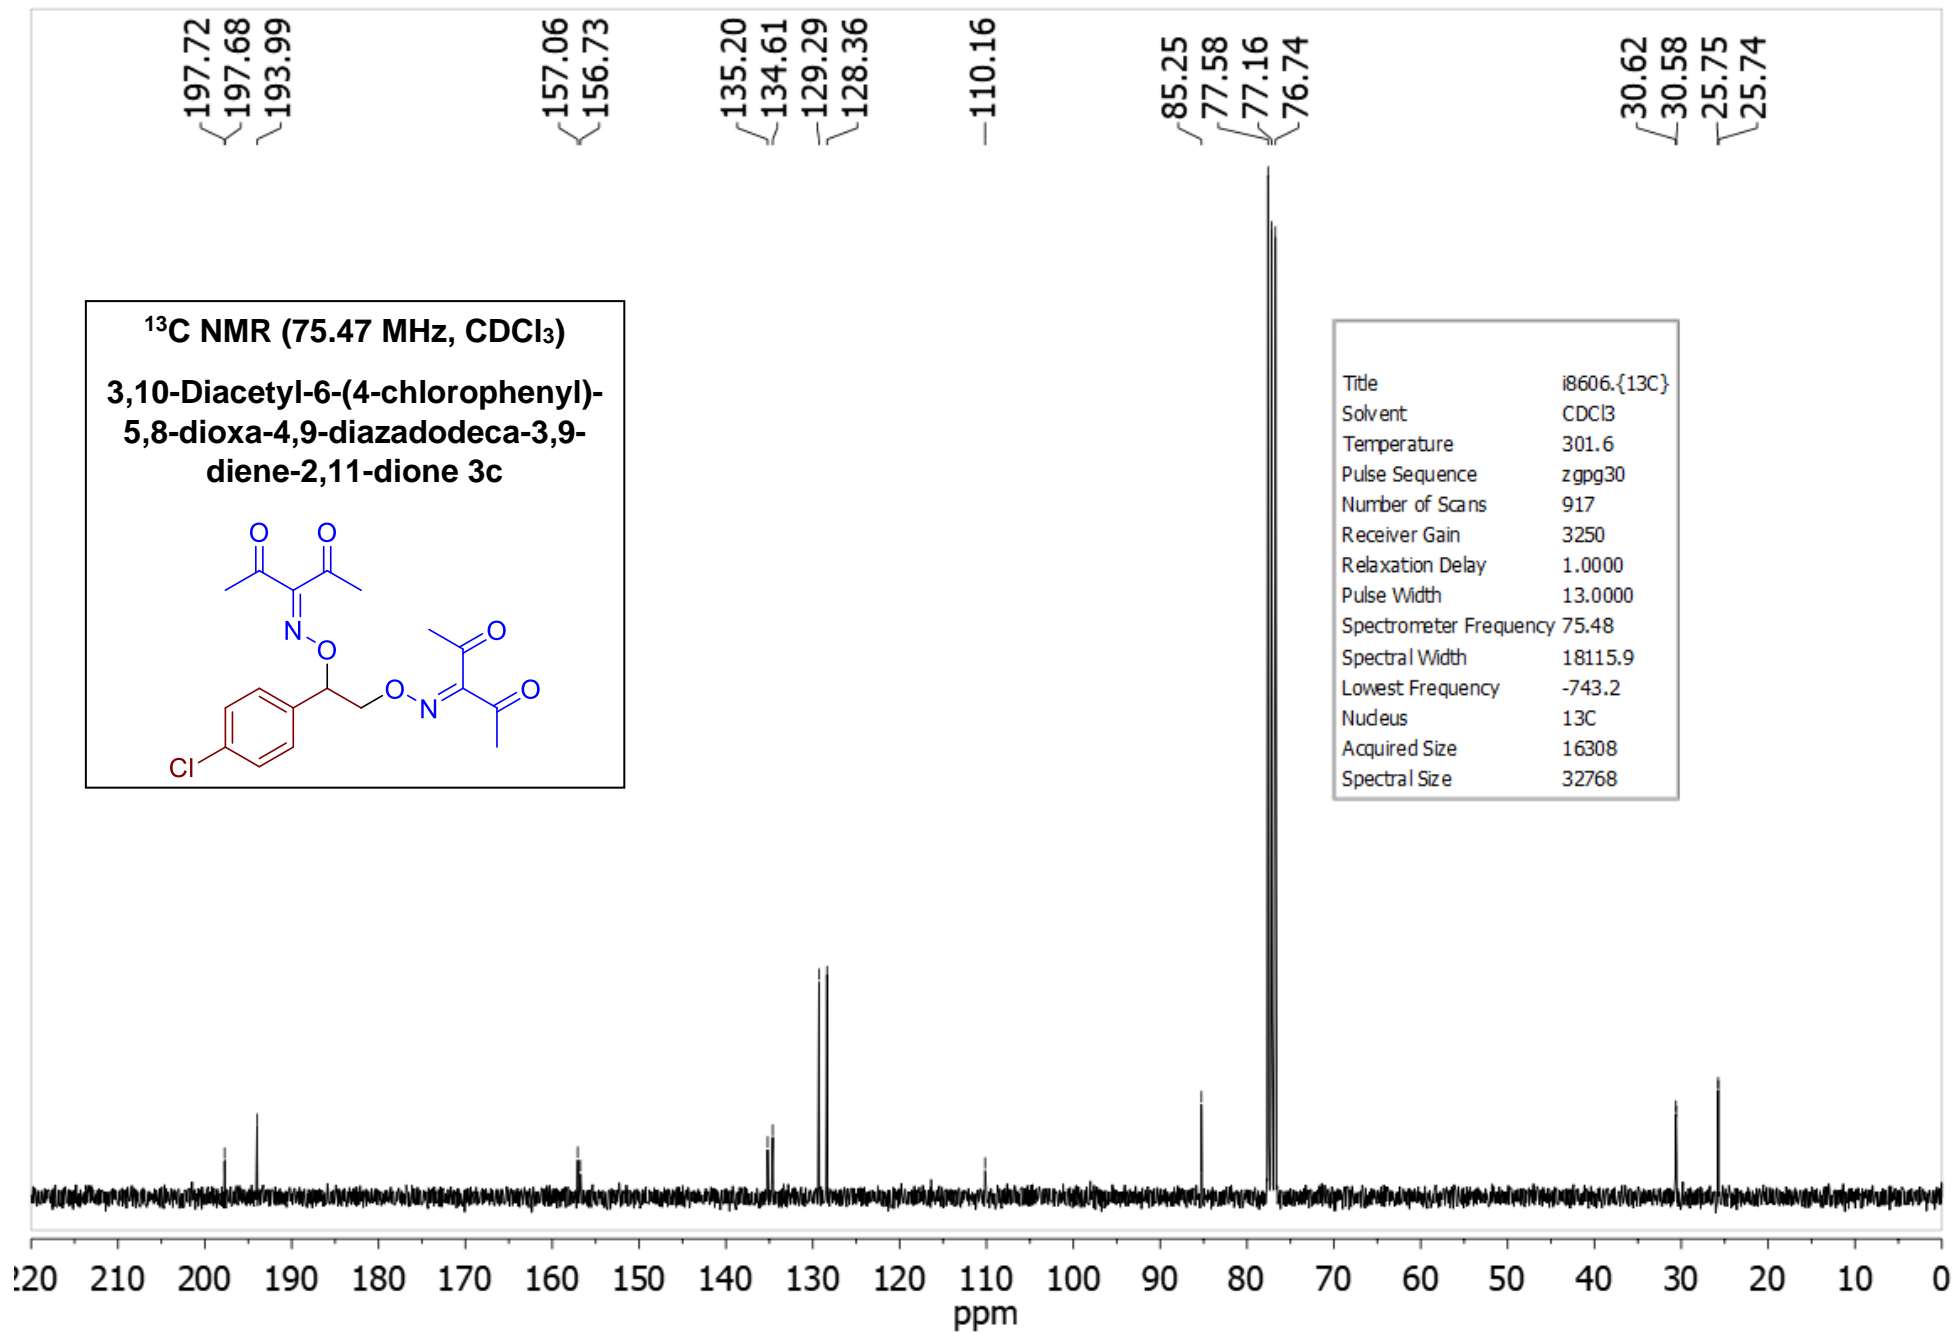

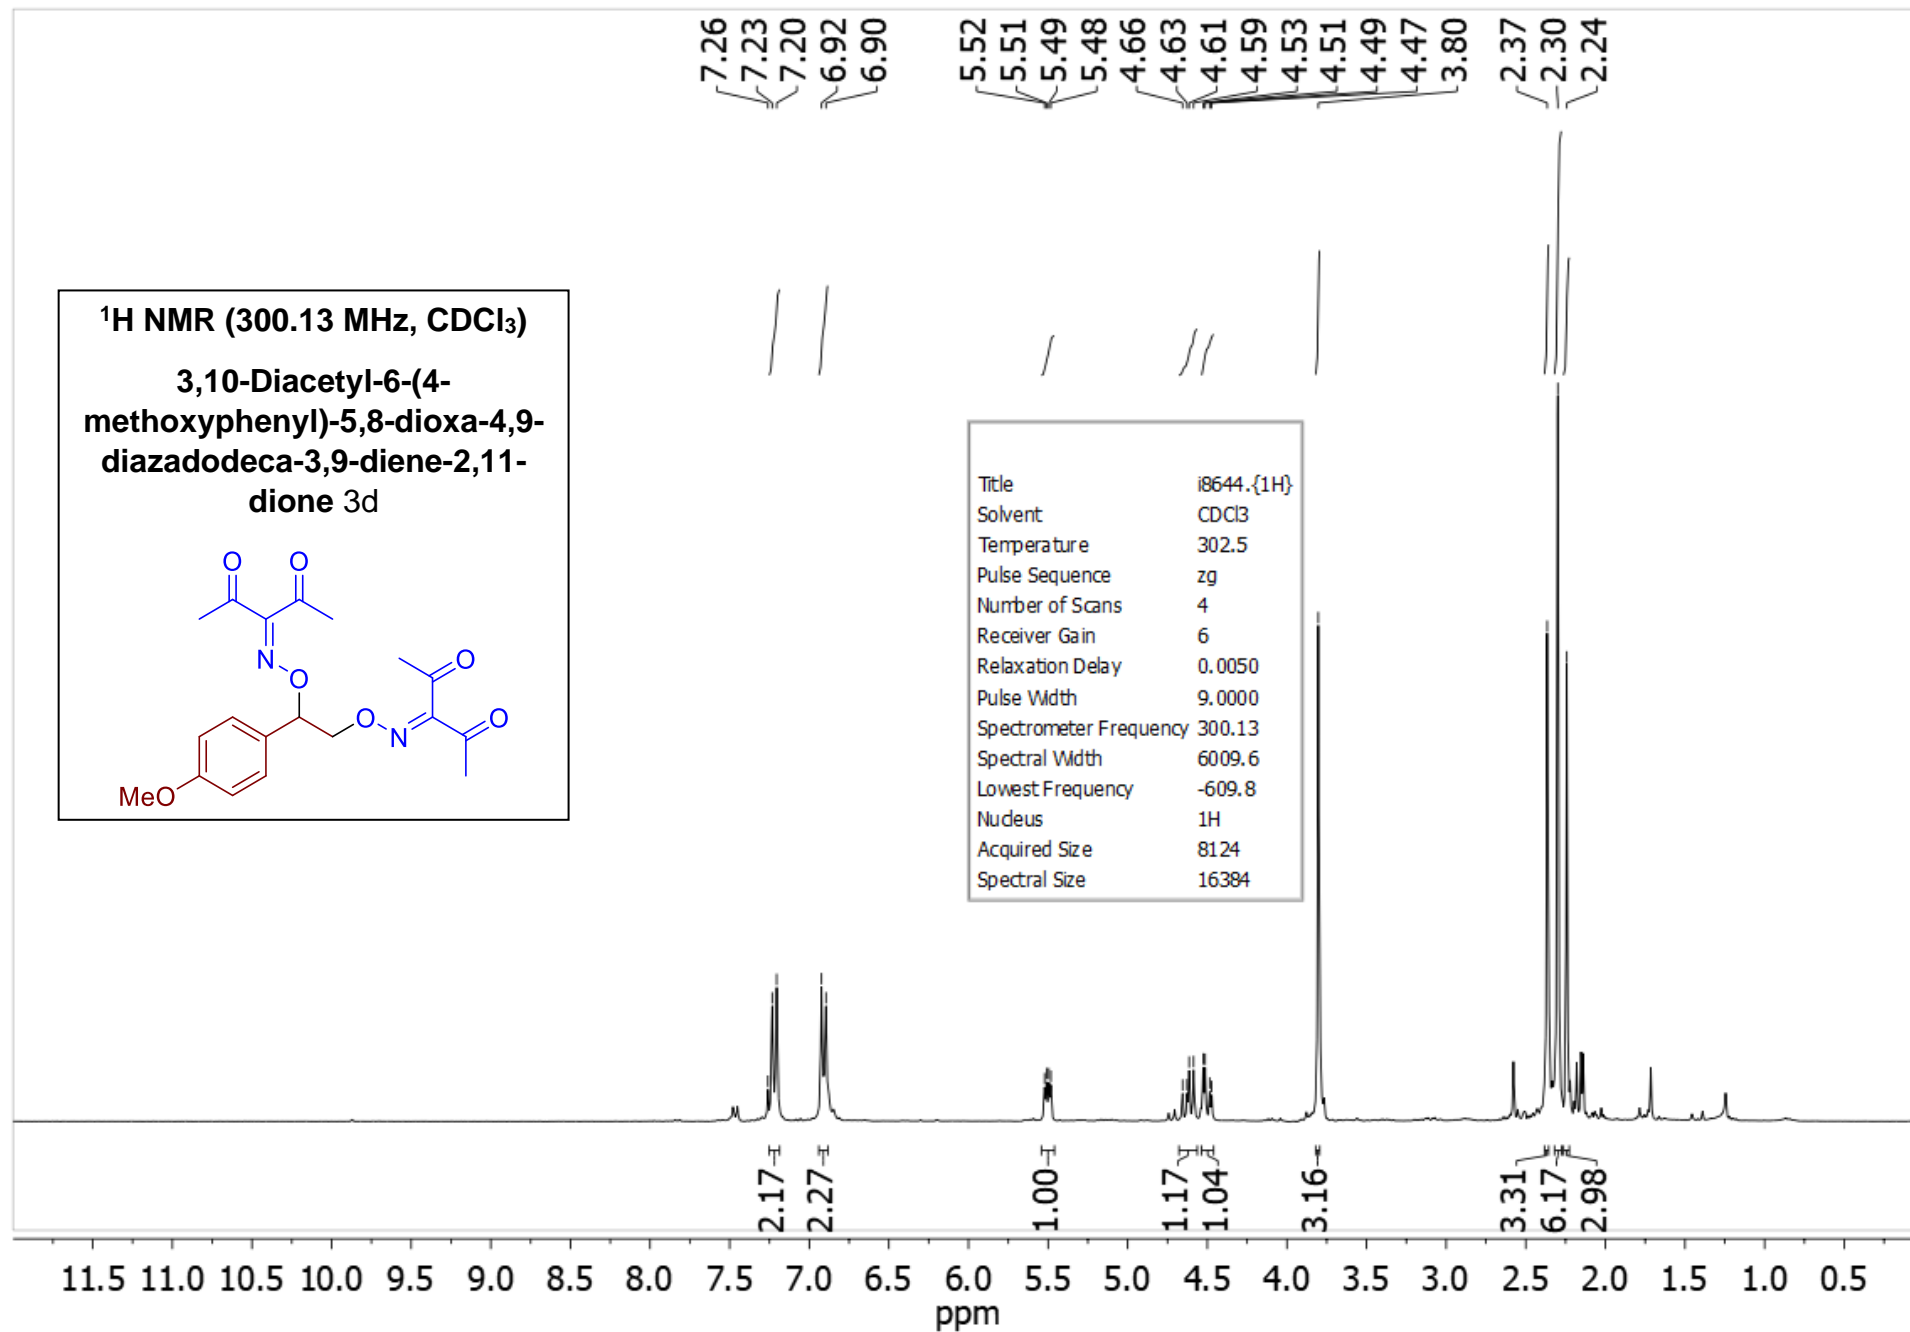



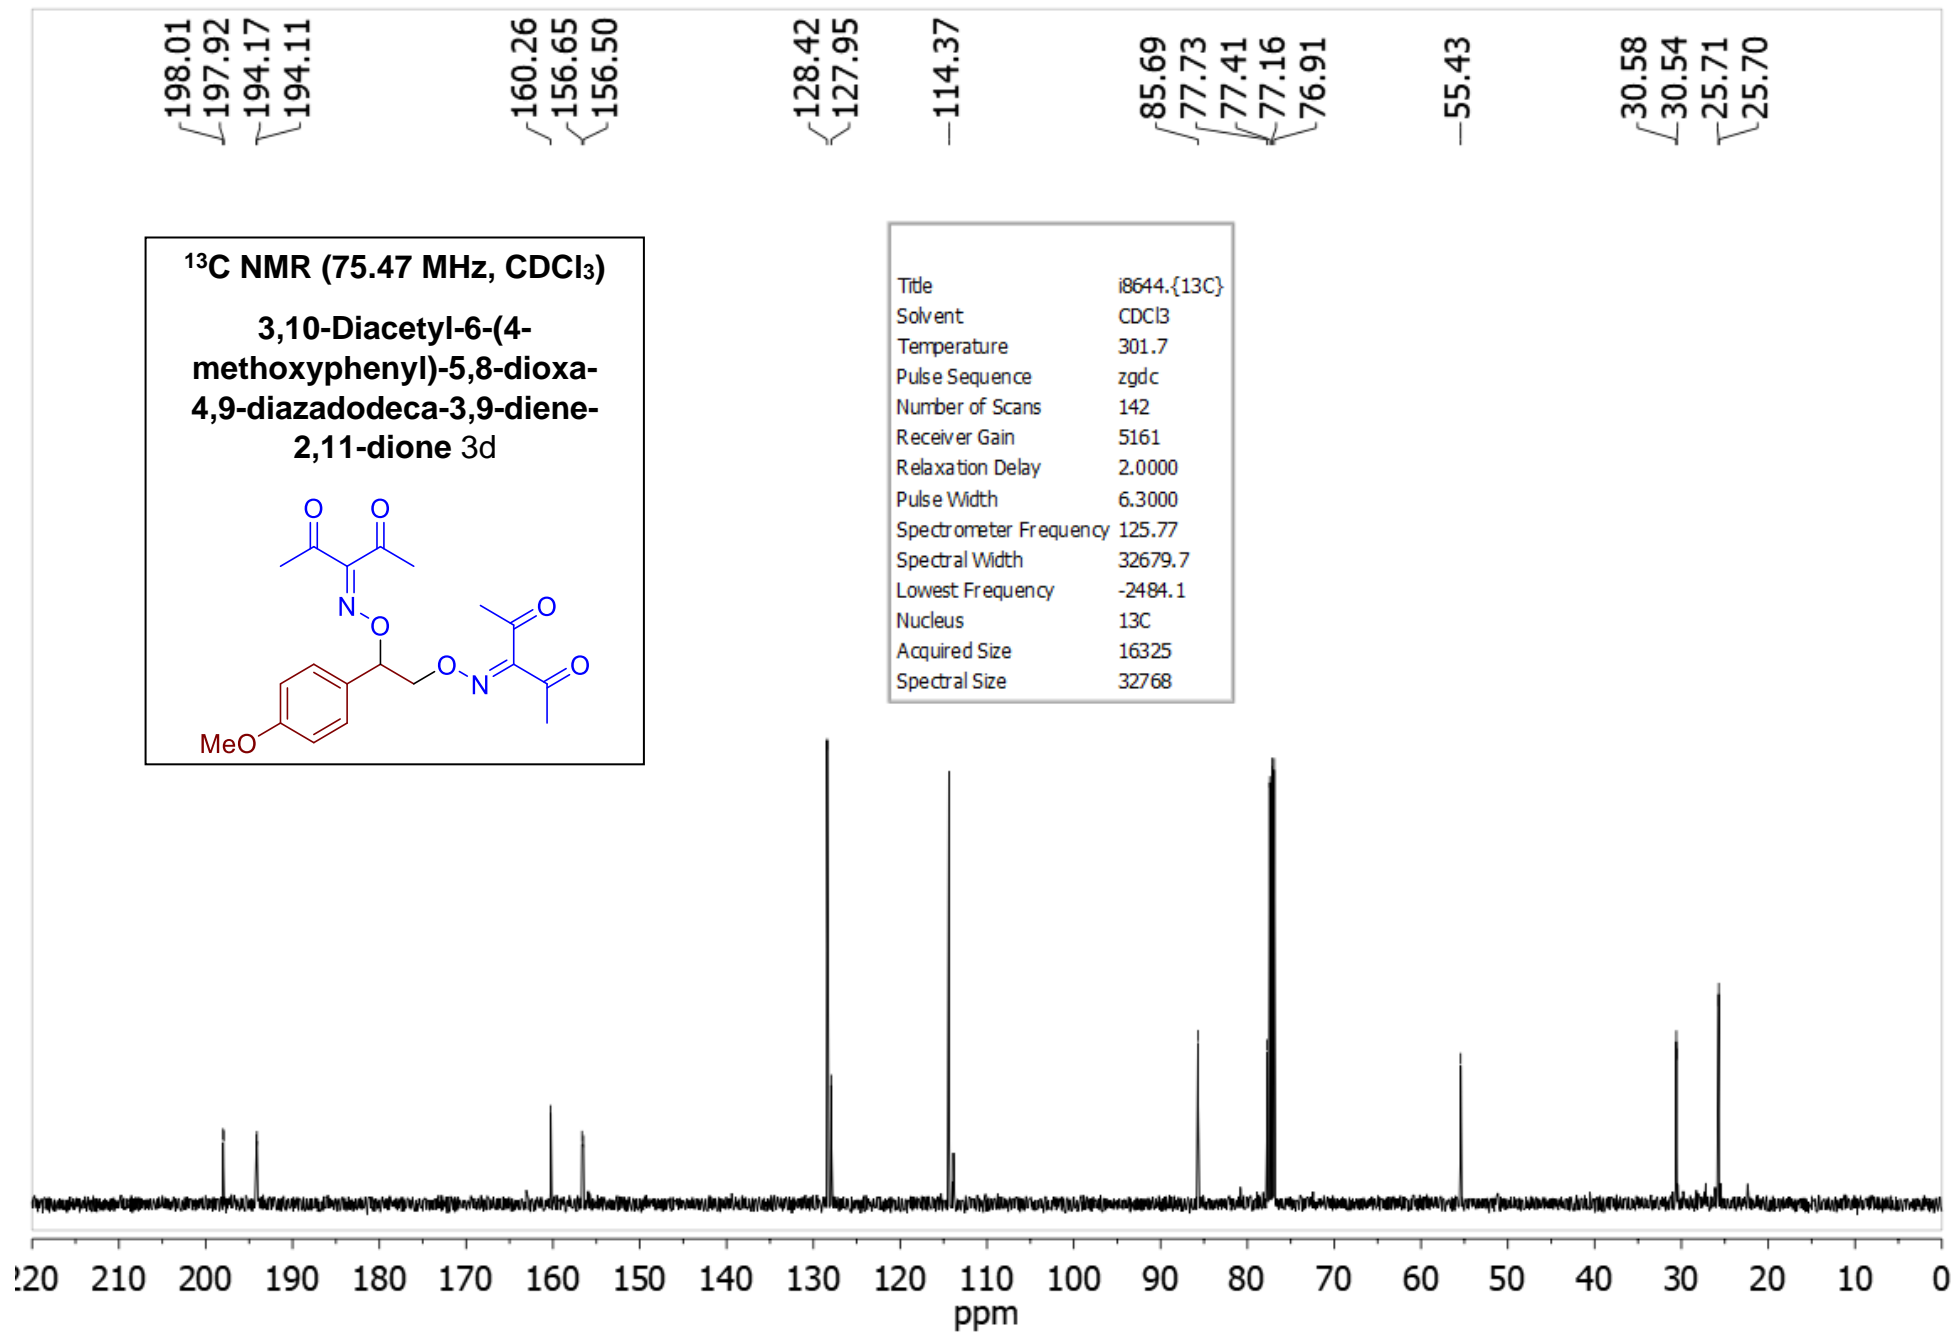

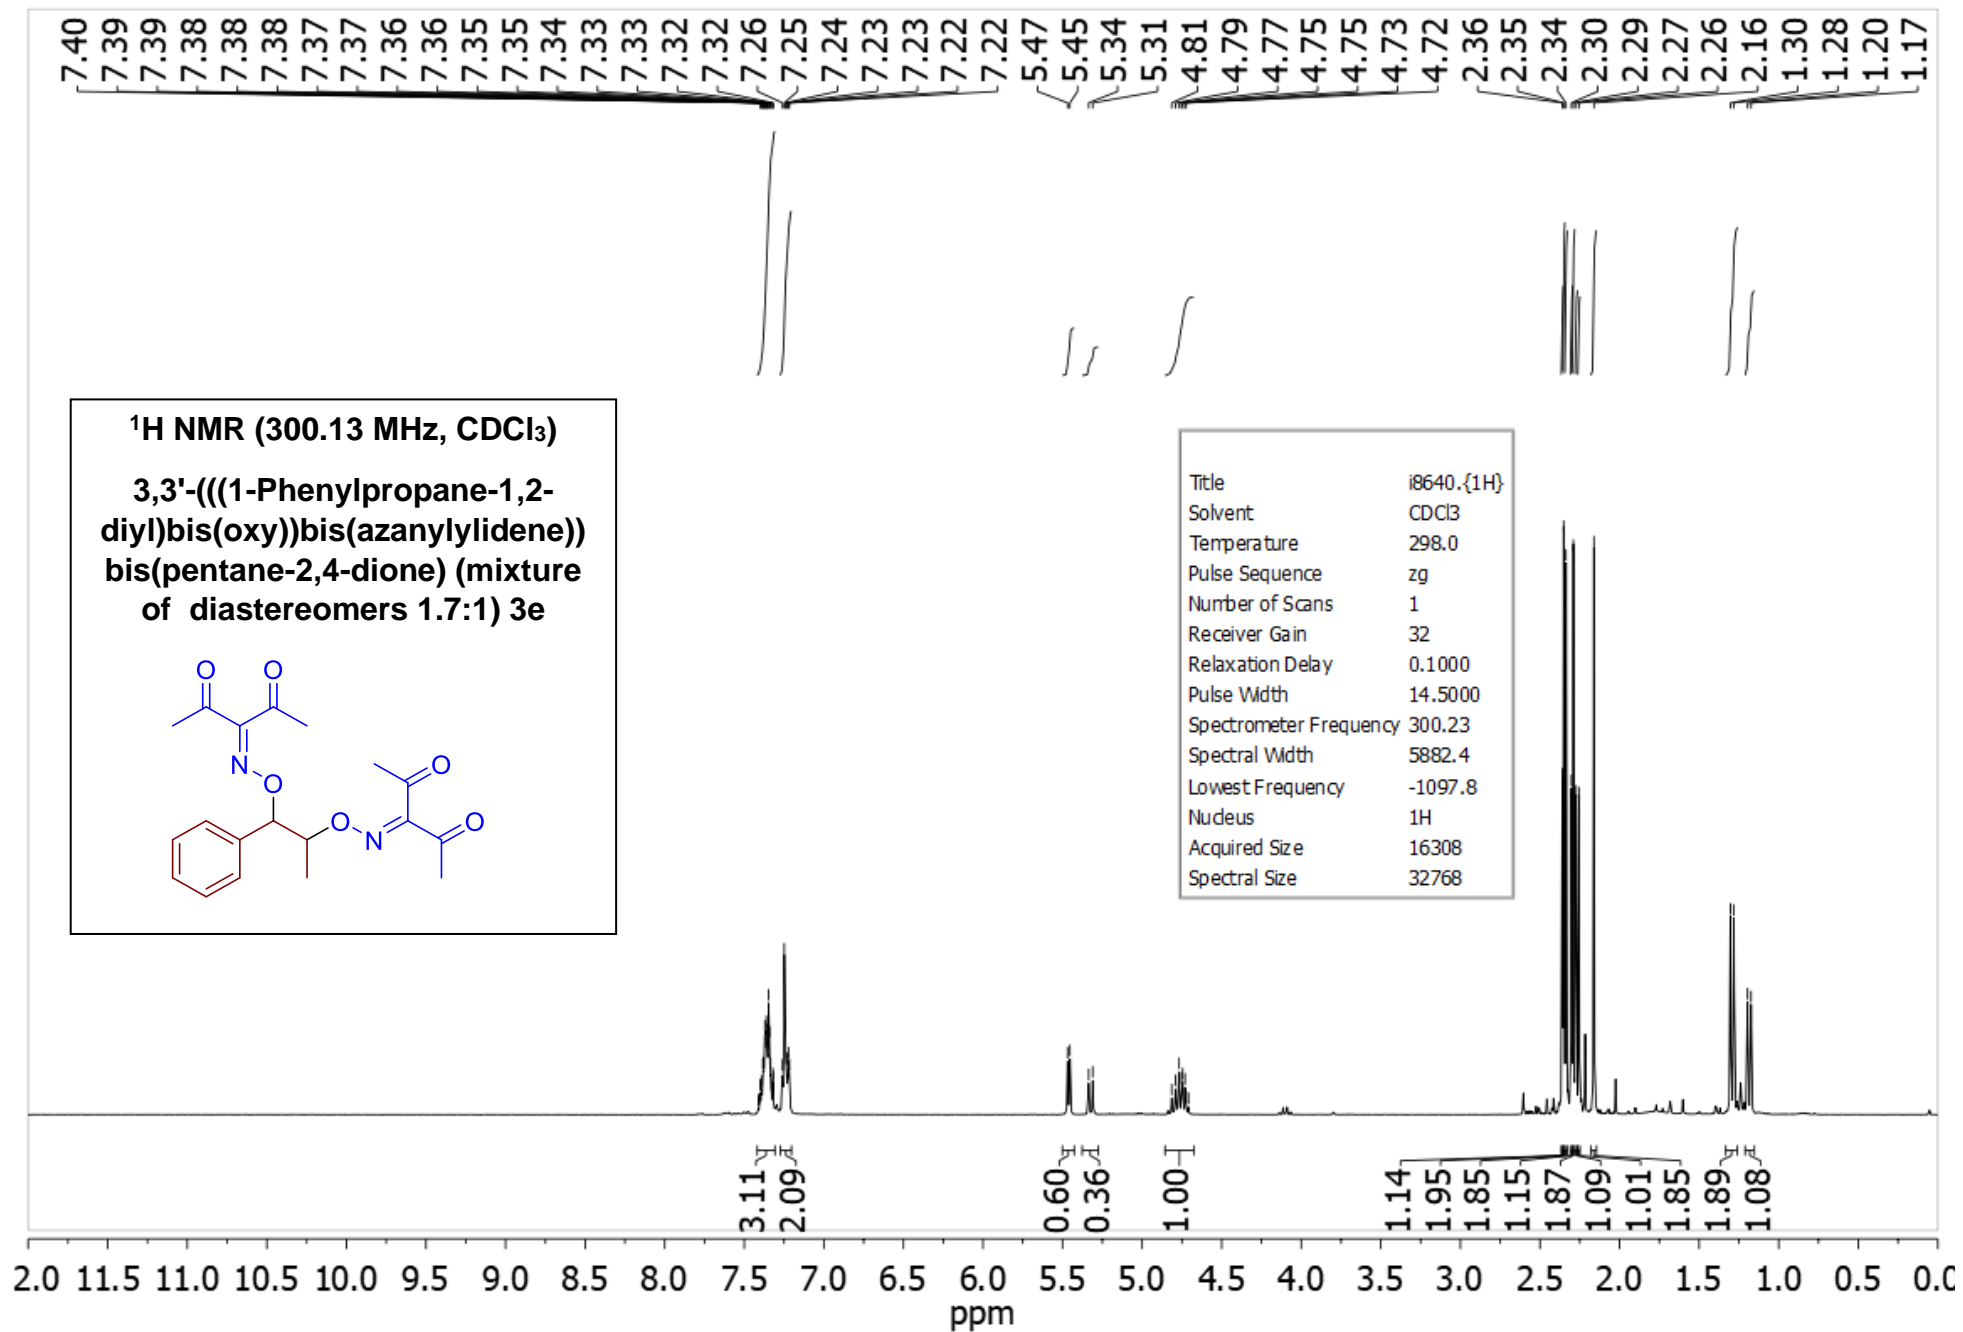

198.35  
198.17  
198.09  
198.03  
194.28  
194.26  
194.22  
194.20

156.81  
156.55  
156.18  
156.08  
136.50  
136.45  
136.26  
129.07  
128.88  
128.71  
127.47  
127.17

89.98  
88.87  
83.88  
83.72  
77.58  
77.16  
76.74

30.61  
30.58  
30.47  
25.74  
25.72  
25.69  
16.40  
14.75

<sup>13</sup>C NMR (75.47 MHz, CDCl<sub>3</sub>)

3,3'-(((1-Phenylpropane-1,2-diyl)bis(oxy))bis(azanylylidene))bis(pentane-2,4-dione) (mixture of diastereomers 1.7:1) 3e

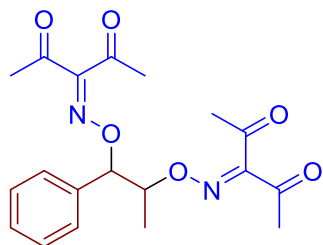

|                        |             |
|------------------------|-------------|
| Title                  | i8640_{13C} |
| Solvent                | CDCl3       |
| Temperature            | 298.0       |
| Pulse Sequence         | zgpg30      |
| Number of Scans        | 200         |
| Receiver Gain          | 101         |
| Relaxation Delay       | 0.8000      |
| Pulse Width            | 10.0000     |
| Spectrometer Frequency | 75.50       |
| Spectral Width         | 17857.1     |
| Lowest Frequency       | -1369.9     |
| Nucleus                | 13C         |
| Acquired Size          | 20412       |
| Spectral Size          | 65536       |

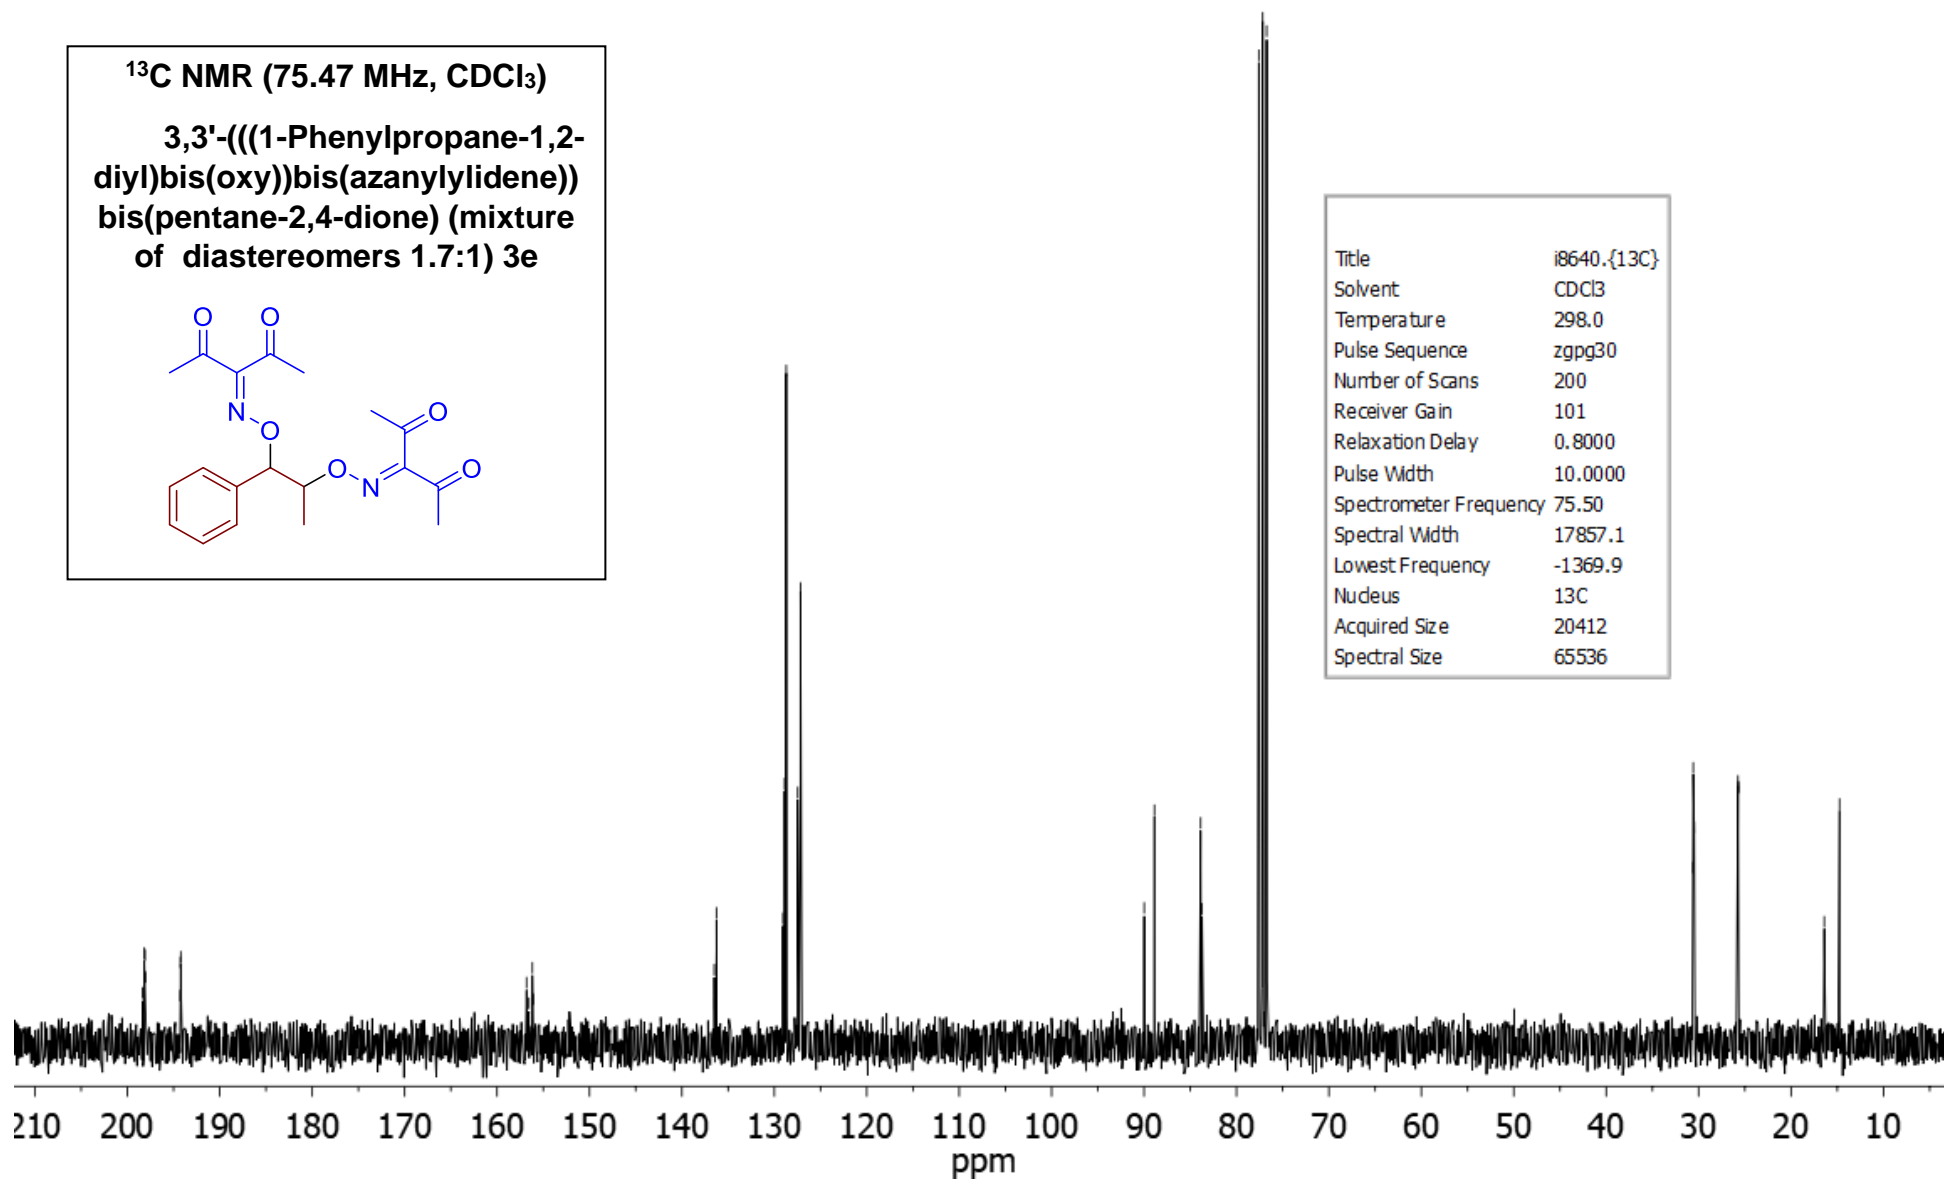

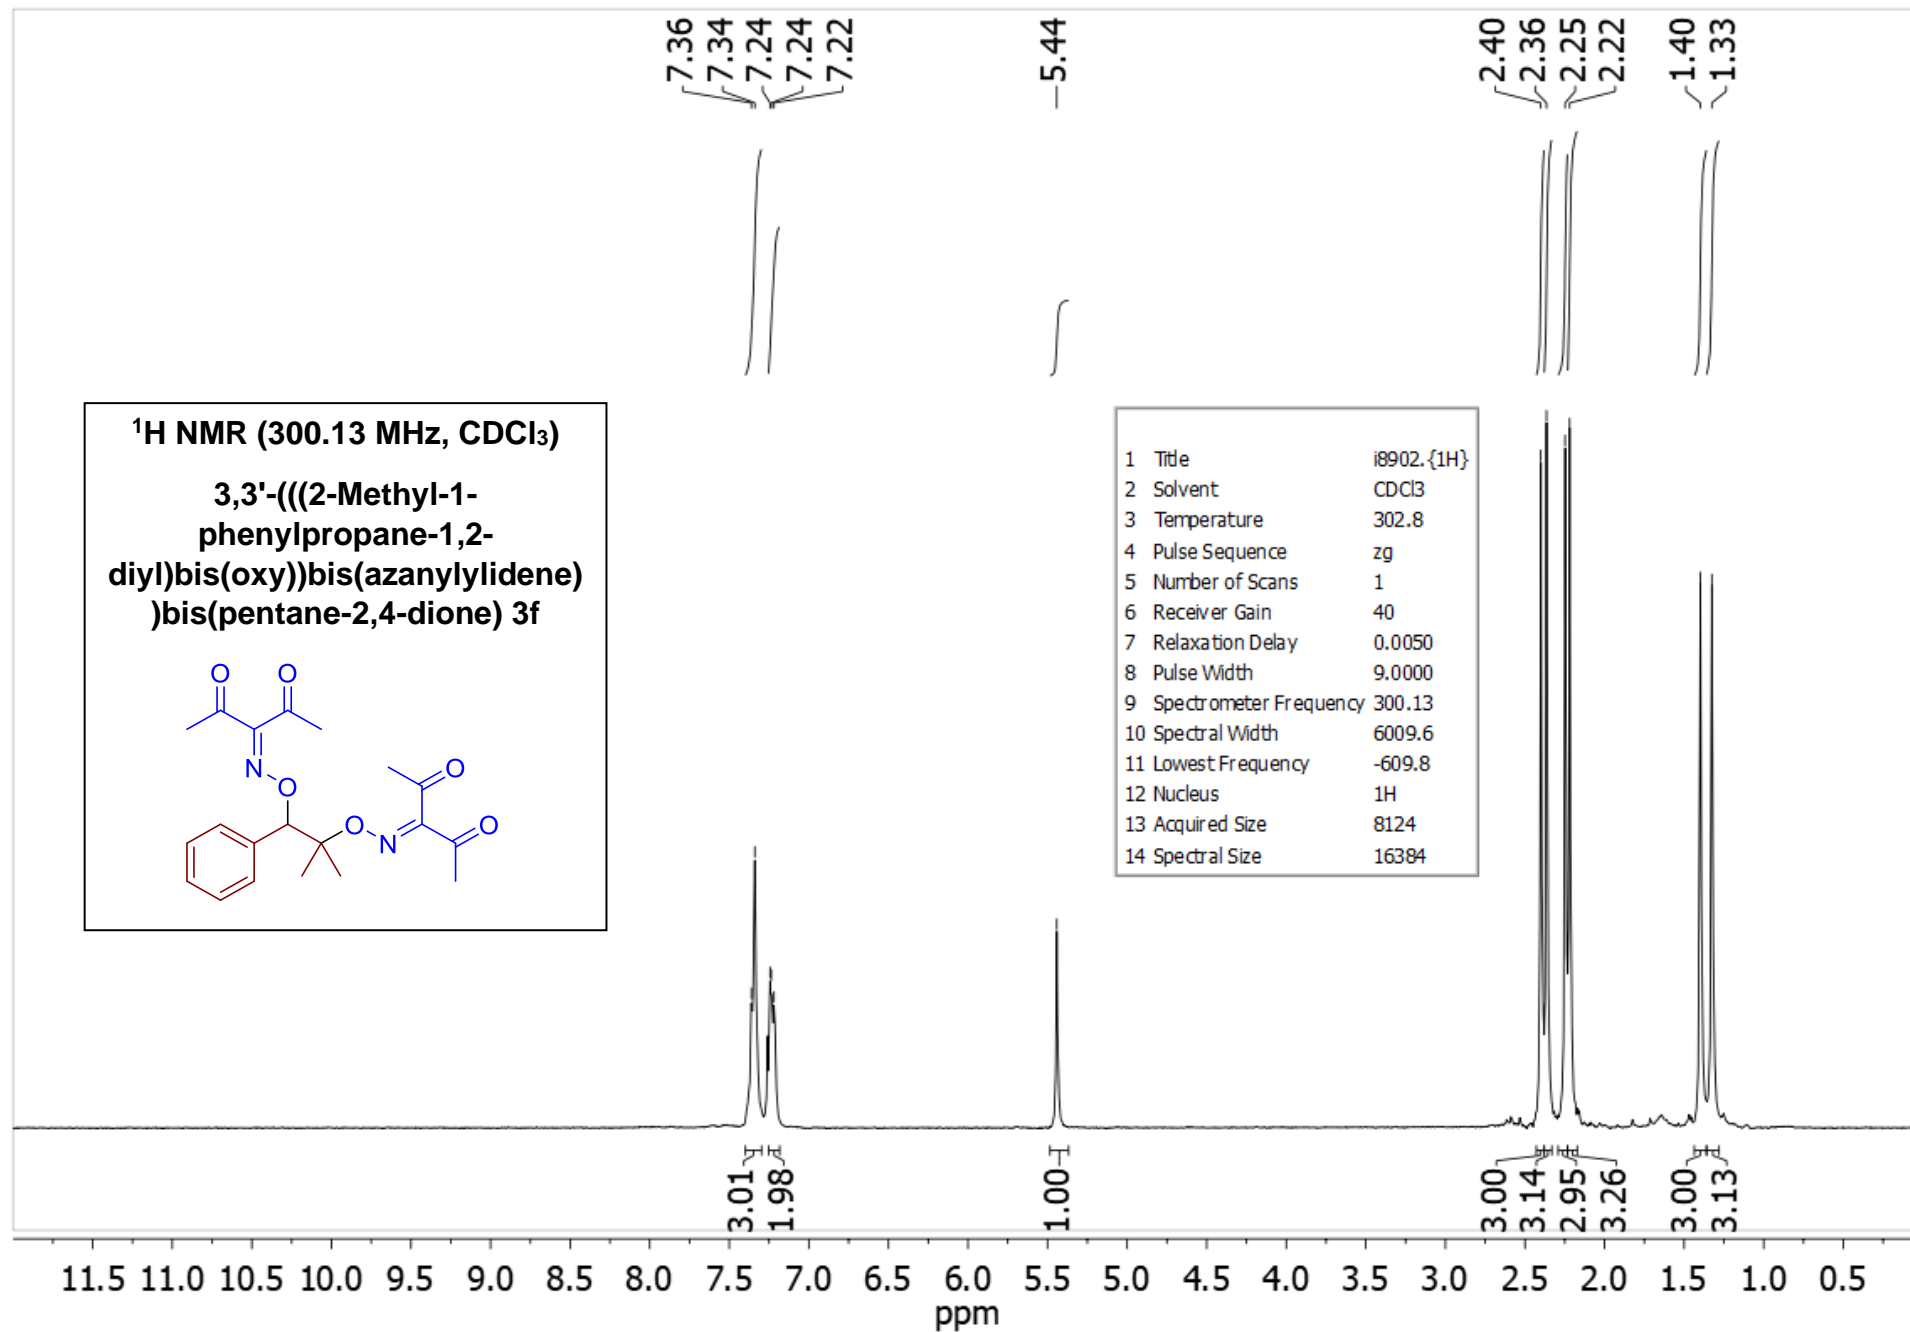

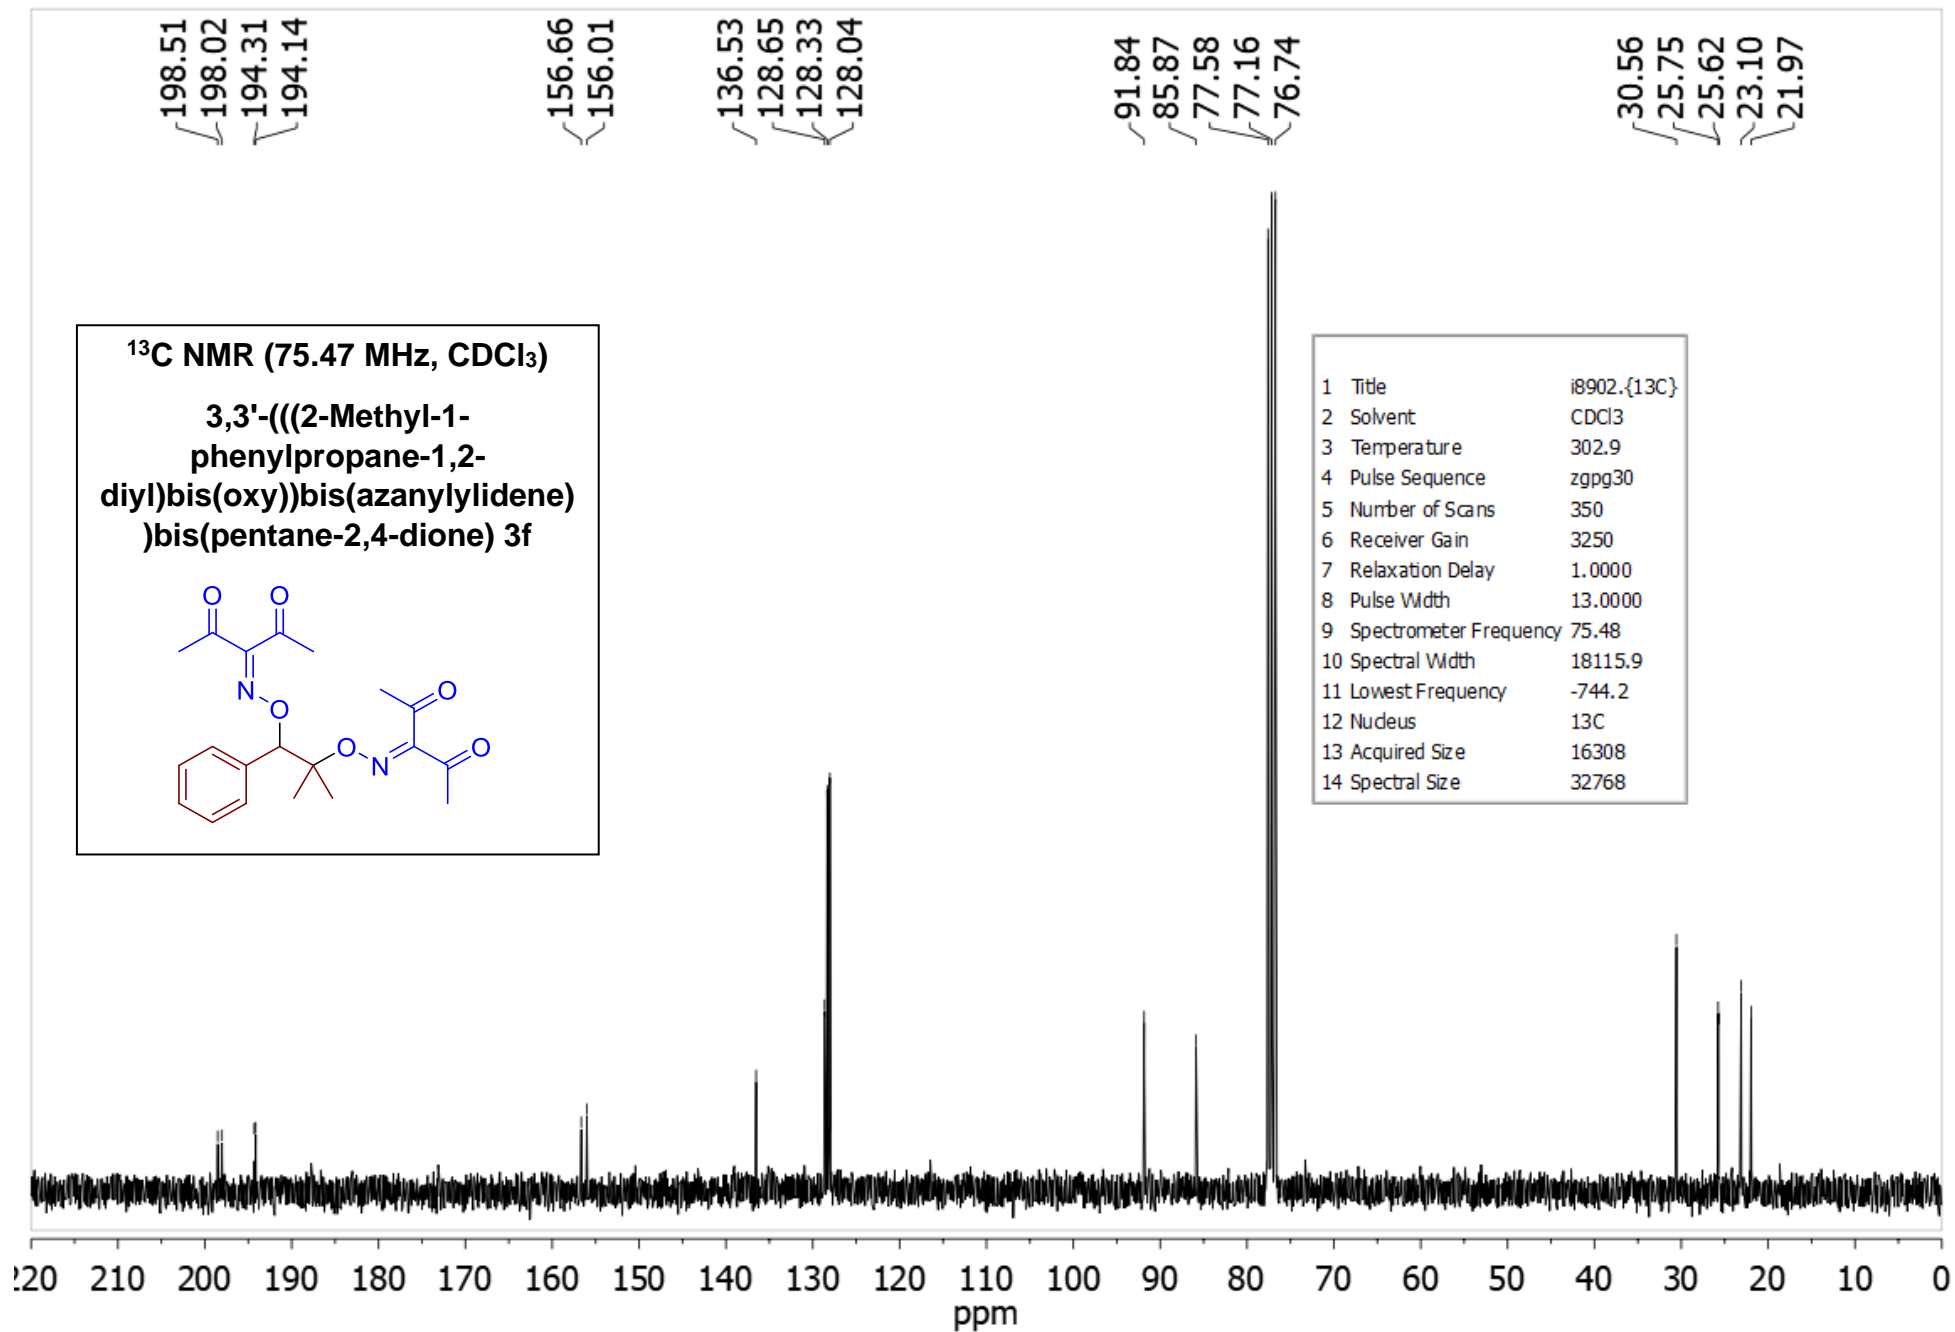

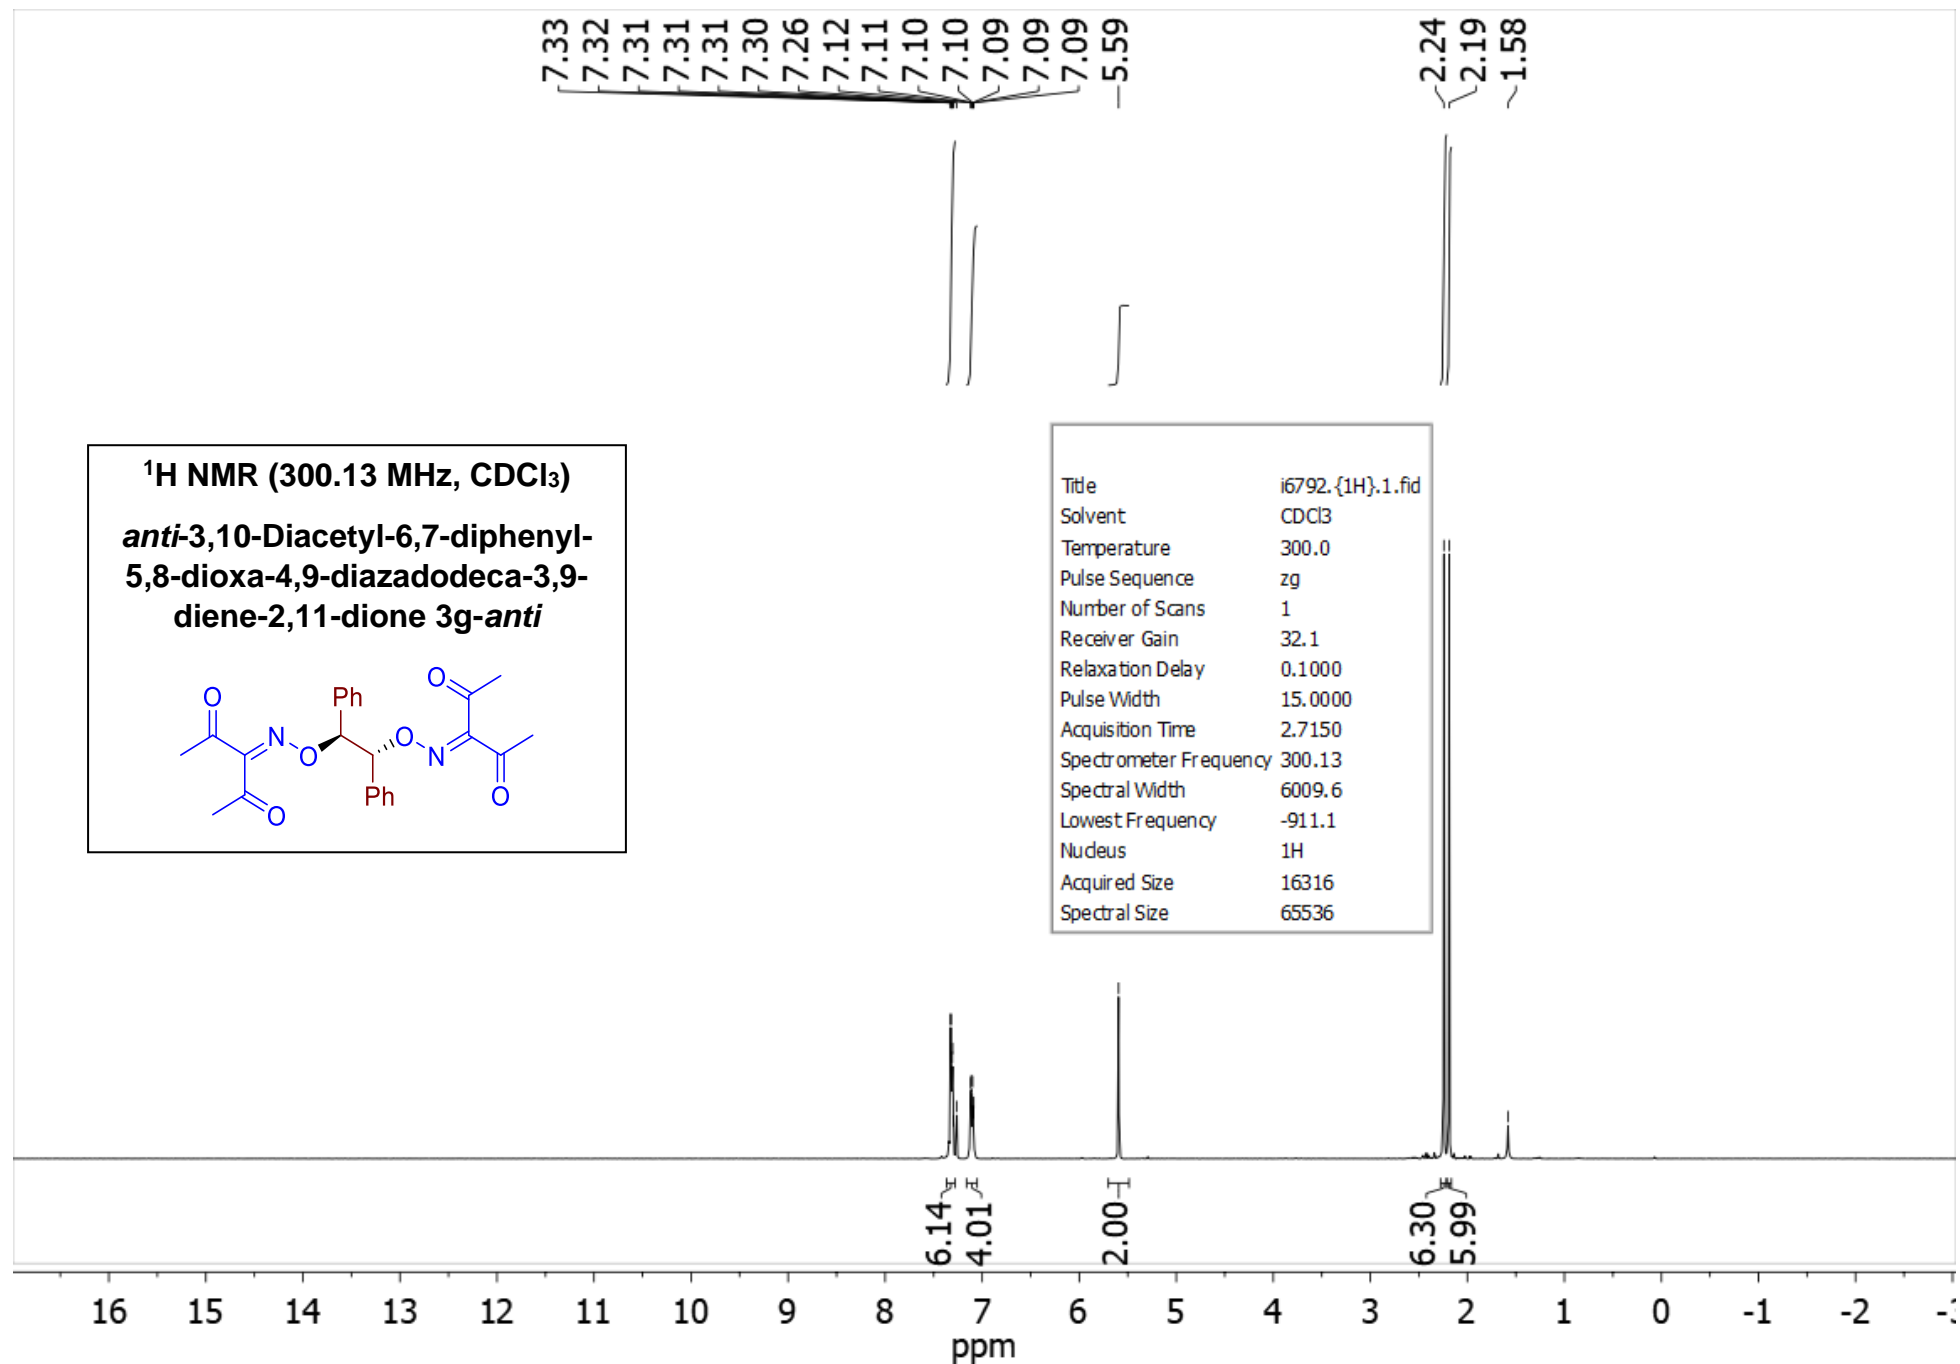

197.97  
194.16

156.65

135.74  
128.91  
128.45  
127.78

89.07

77.58  
77.16  
76.74

30.47  
25.72

<sup>13</sup>C NMR (75.47 MHz, CDCl<sub>3</sub>)

*anti*-3,10-Diacetyl-6,7-diphenyl-  
5,8-dioxa-4,9-diazadodeca-3,9-  
diene-2,11-dione 3*g-anti*

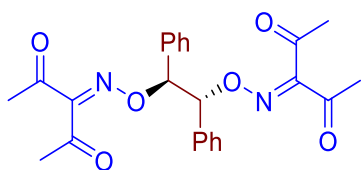

|                        |                               |
|------------------------|-------------------------------|
| Title                  | i6792- <sup>13</sup> C}.2.fid |
| Solvent                | CDCl <sub>3</sub>             |
| Temperature            | 300.0                         |
| Pulse Sequence         | zgpg30                        |
| Number of Scans        | 60                            |
| Receiver Gain          | 214.2                         |
| Relaxation Delay       | 0.8000                        |
| Pulse Width            | 9.0000                        |
| Acquisition Time       | 0.9050                        |
| Spectrometer Frequency | 75.48                         |
| Spectral Width         | 18028.8                       |
| Lowest Frequency       | -1458.3                       |
| Nucleus                | <sup>13</sup> C               |
| Acquired Size          | 16316                         |
| Spectral Size          | 65536                         |

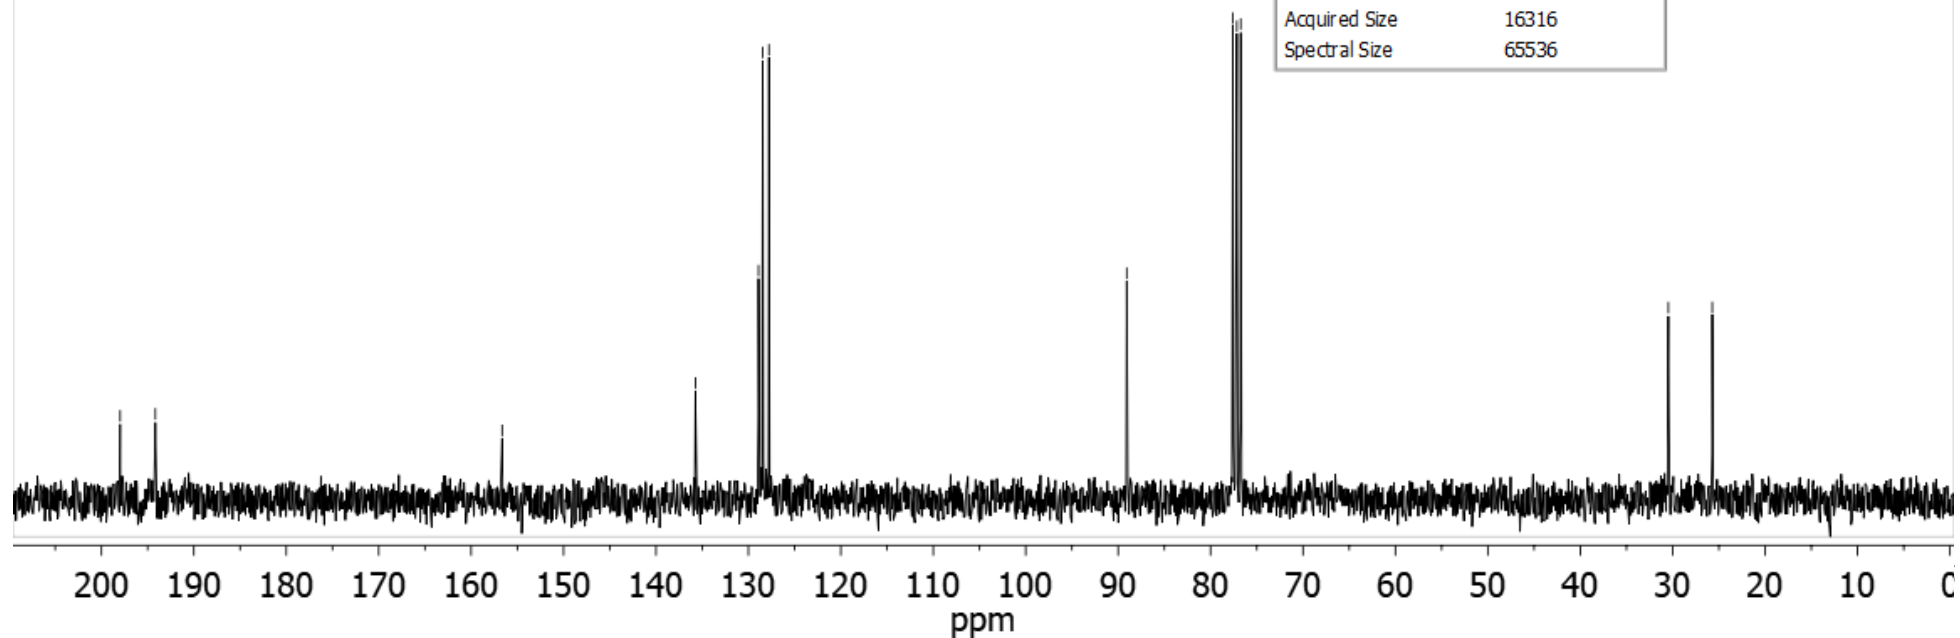

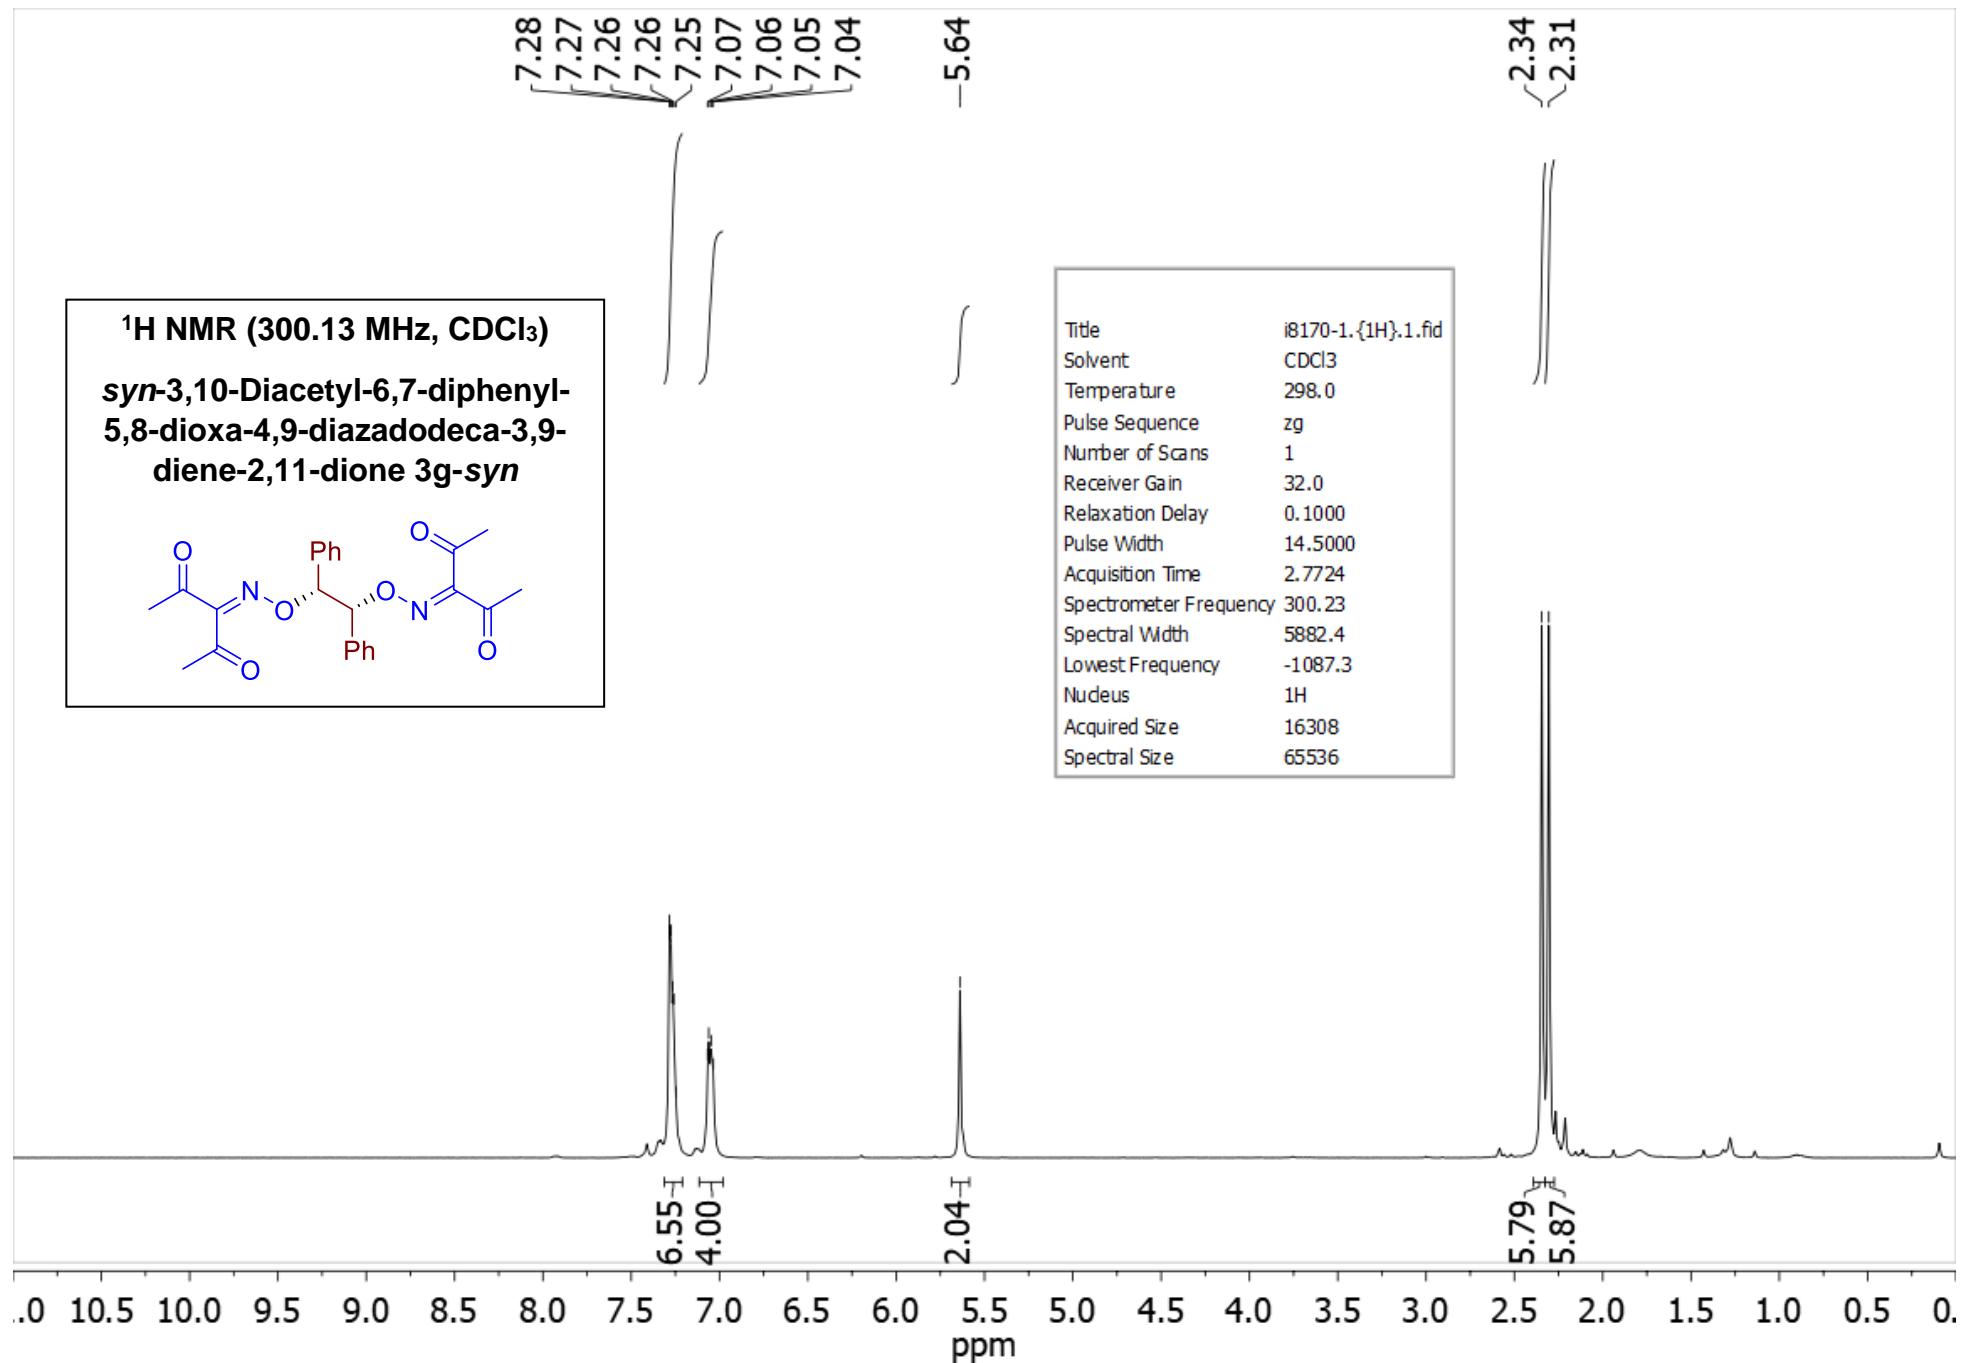



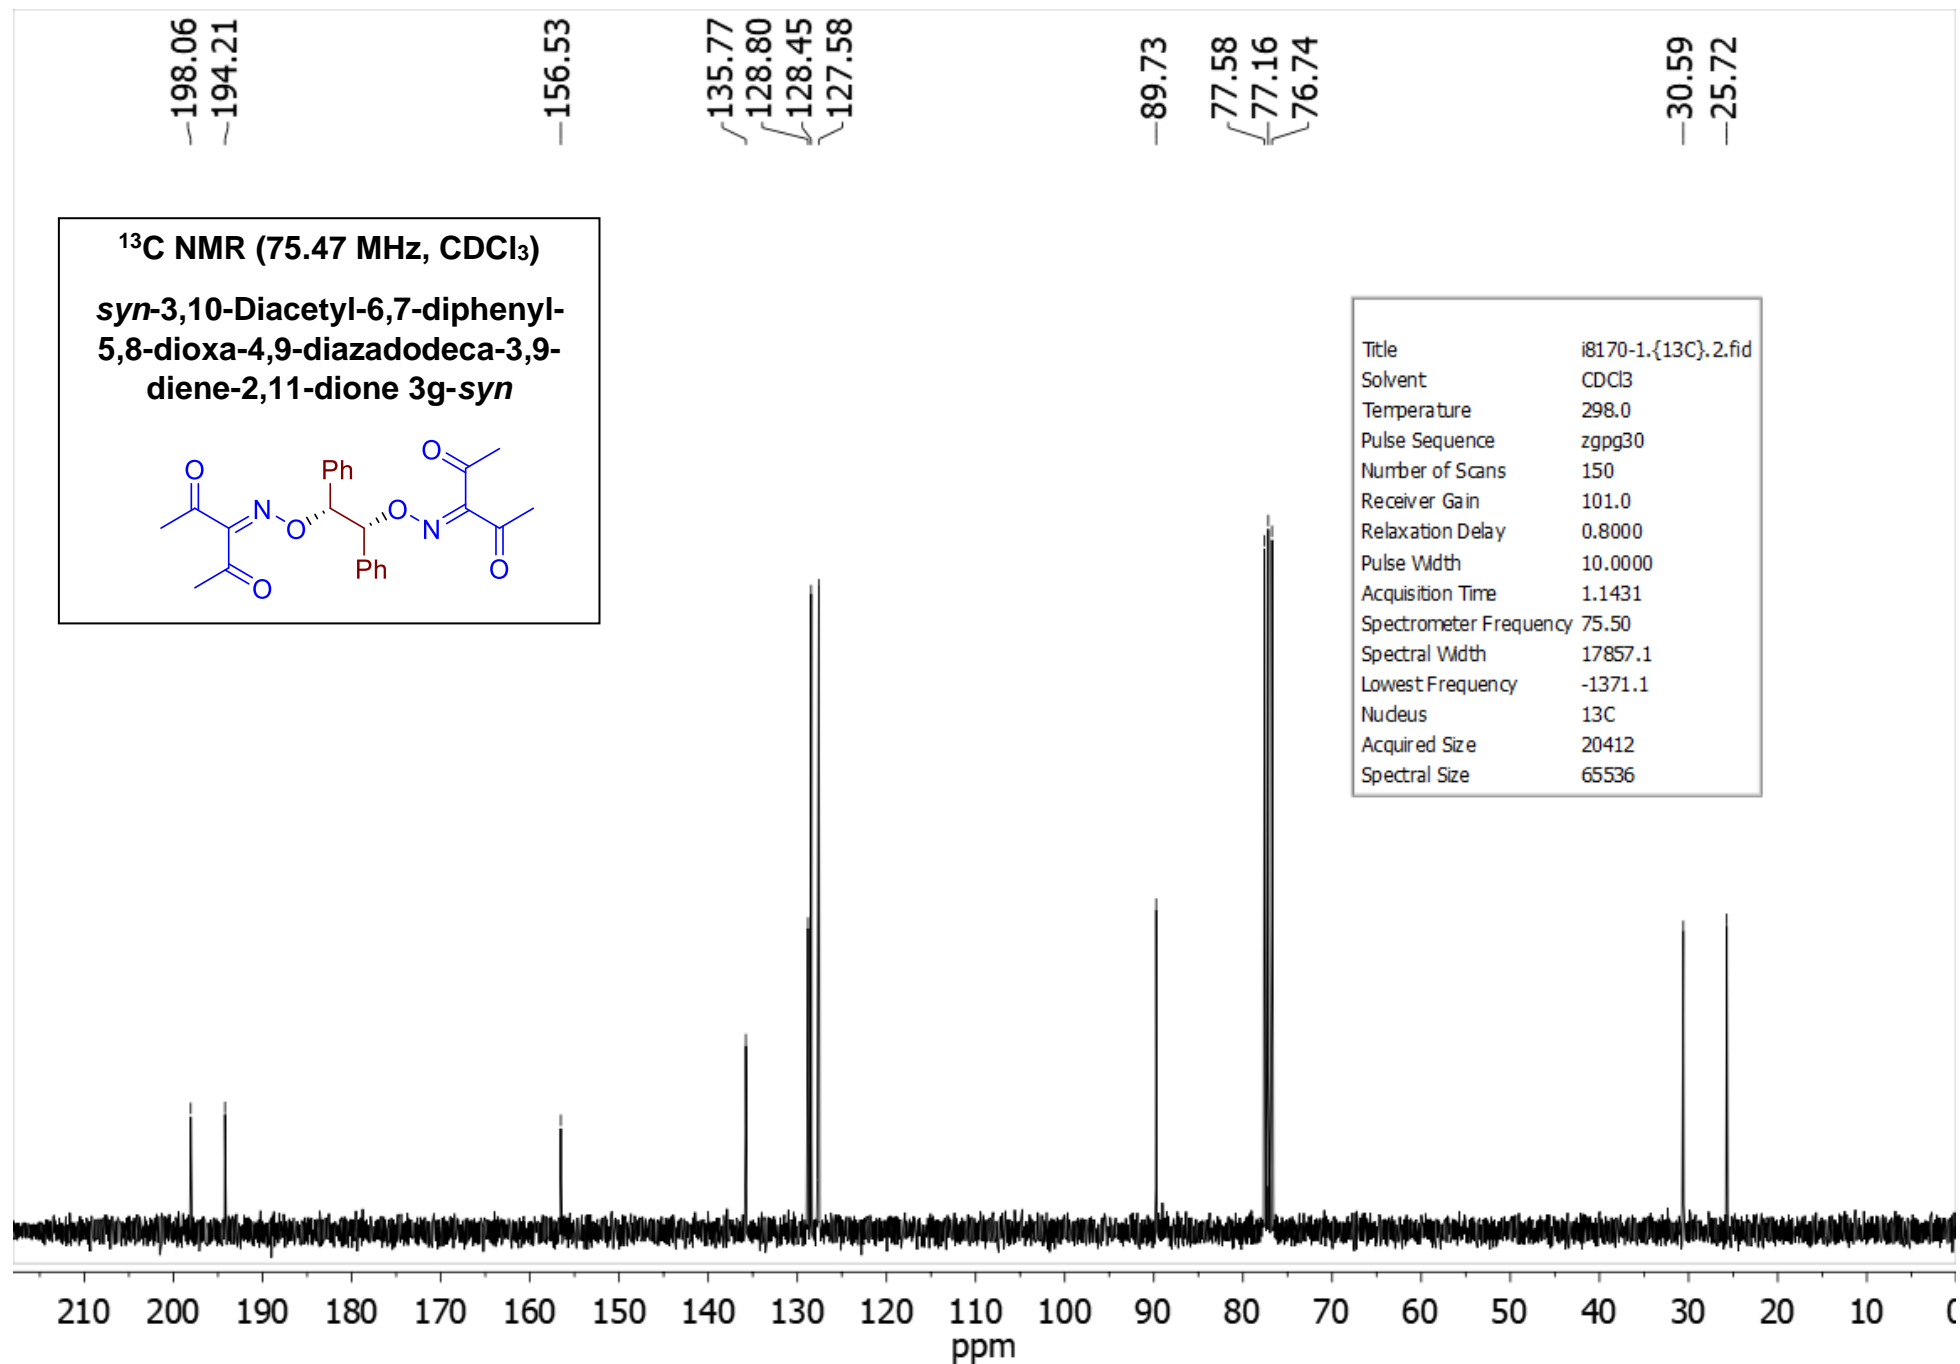

7.40  
7.39  
7.38  
7.37  
7.36  
7.35  
7.34  
7.34  
7.31  
7.31  
7.28  
7.26  
7.25  
5.90  
5.89  
5.28  
5.27  
5.27  
5.26  
5.24  
5.24  
5.23  
3.55  
3.53  
3.50  
3.47  
3.16  
3.14  
3.10  
3.08  
2.39  
2.29  
2.27

**<sup>1</sup>H NMR (300.13 MHz, CDCl<sub>3</sub>)**

**3,3'-(((2,3-Dihydro-1H-indene-1,2-diyloxy))bis(azanylylidene))bis(pentane-2,4-dione)-1-*major* 3i-*major***

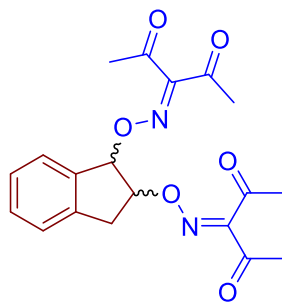

|    |                        |                    |
|----|------------------------|--------------------|
| 1  | Title                  | i8124-2-{1H}.1.fid |
| 2  | Solvent                | CDCl <sub>3</sub>  |
| 3  | Temperature            | 298.0              |
| 4  | Pulse Sequence         | zg                 |
| 5  | Number of Scans        | 1                  |
| 6  | Receiver Gain          | 32.0               |
| 7  | Relaxation Delay       | 0.1000             |
| 8  | Pulse Width            | 14.5000            |
| 9  | Acquisition Time       | 2.7724             |
| 10 | Spectrometer Frequency | 300.23             |
| 11 | Spectral Width         | 5882.4             |
| 12 | Lowest Frequency       | -1094.2            |
| 13 | Nucleus                | <sup>1</sup> H     |
| 14 | Acquired Size          | 16308              |
| 15 | Spectral Size          | 65536              |

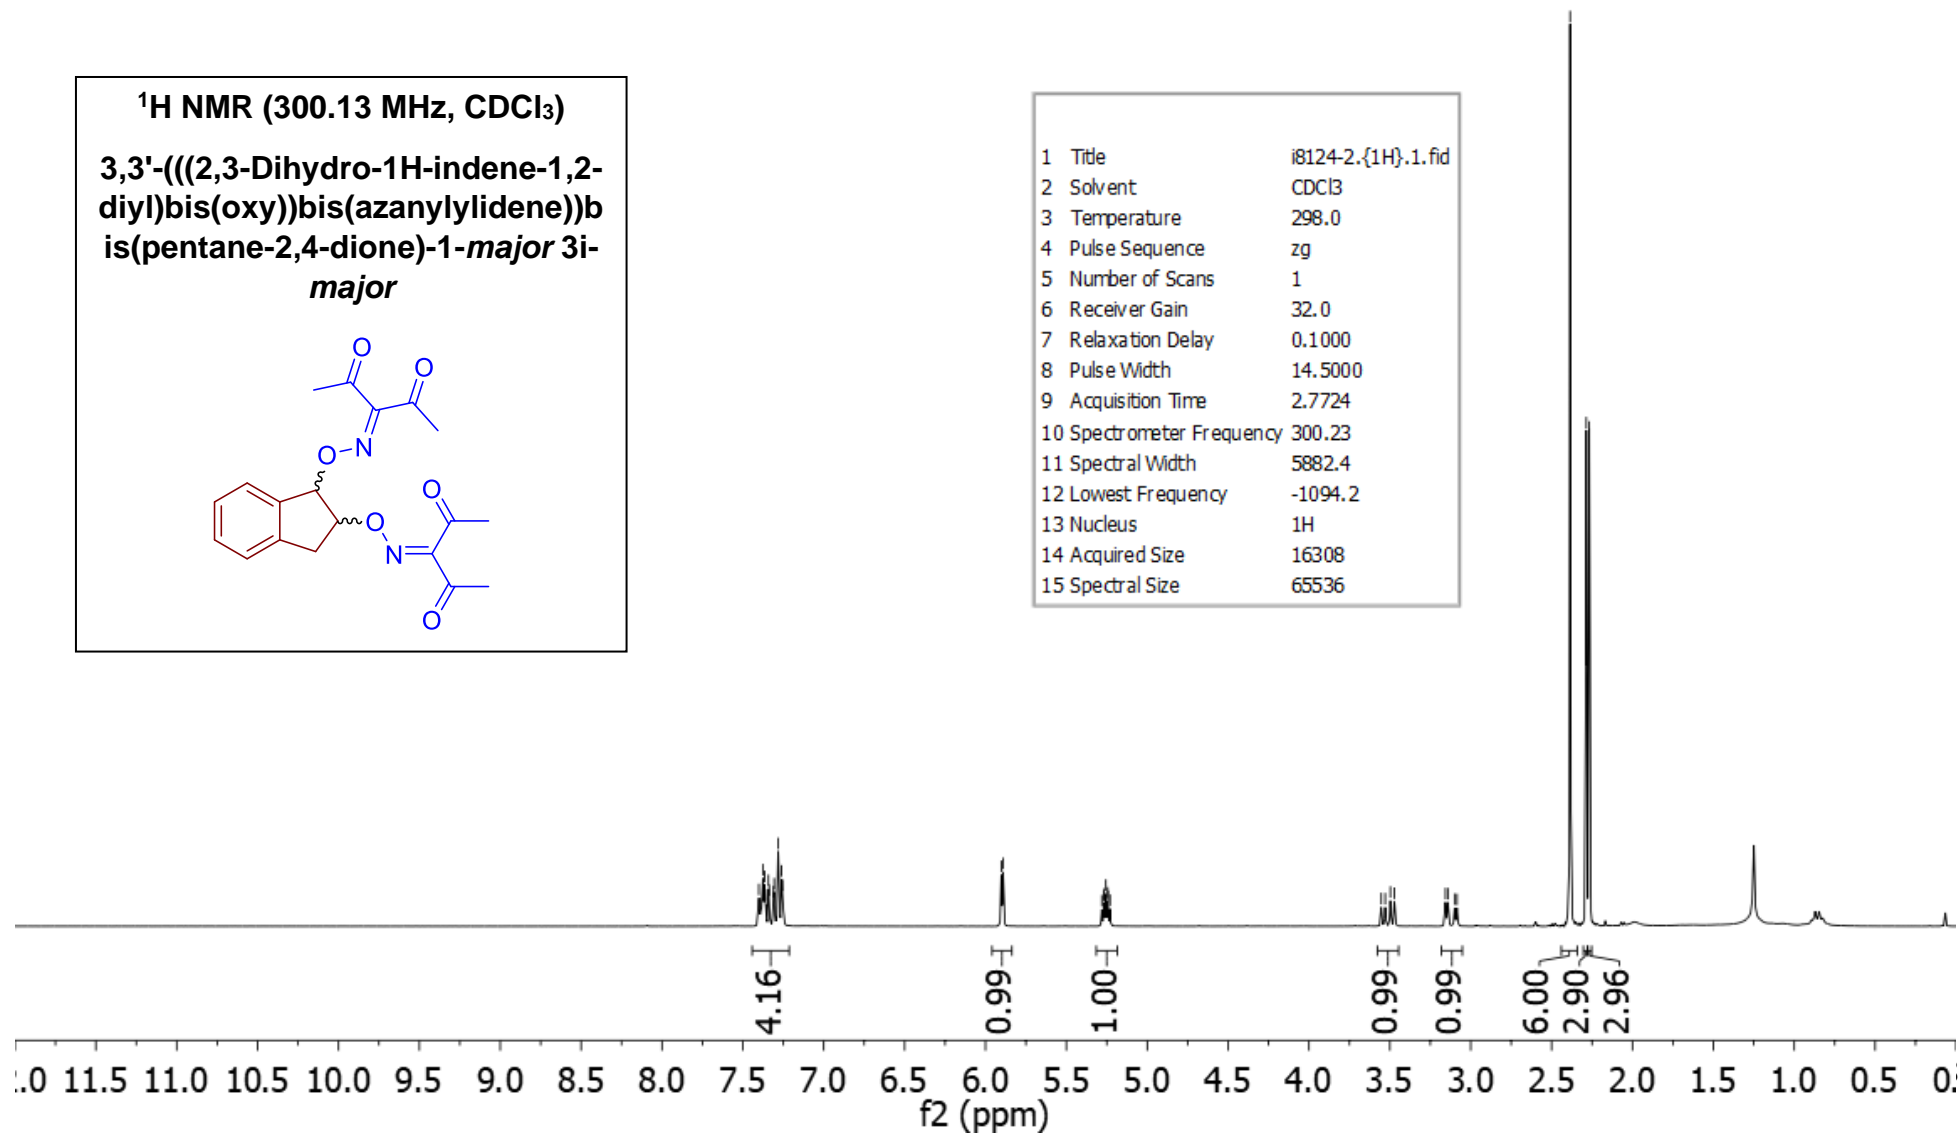

197.94  
194.14

156.82

140.74  
137.15  
130.25  
127.76  
125.74  
125.26

92.02  
89.74  
77.58  
77.16  
76.74

36.17  
30.66  
25.77  
25.74

<sup>13</sup>C NMR (75.47 MHz, CDCl<sub>3</sub>)

3,3'-(((2,3-Dihydro-1H-indene-1,2-diyloxy))bis(azanylylidene))bis(pentane-2,4-dione)-1-major 3i-major

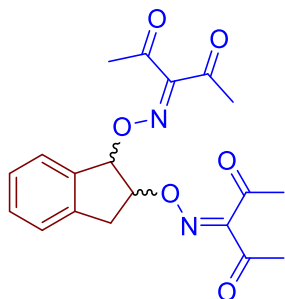

|    |                        |                                 |
|----|------------------------|---------------------------------|
| 1  | Title                  | i8124-2- <sup>13</sup> C}.2.fid |
| 2  | Solvent                | CDCl <sub>3</sub>               |
| 3  | Temperature            | 298.0                           |
| 4  | Pulse Sequence         | zgpg30                          |
| 5  | Number of Scans        | 120                             |
| 6  | Receiver Gain          | 101.0                           |
| 7  | Relaxation Delay       | 0.8000                          |
| 8  | Pulse Width            | 10.0000                         |
| 9  | Acquisition Time       | 1.1431                          |
| 10 | Spectrometer Frequency | 75.50                           |
| 11 | Spectral Width         | 17857.1                         |
| 12 | Lowest Frequency       | -1372.6                         |
| 13 | Nucleus                | <sup>13</sup> C                 |
| 14 | Acquired Size          | 20412                           |
| 15 | Spectral Size          | 65536                           |

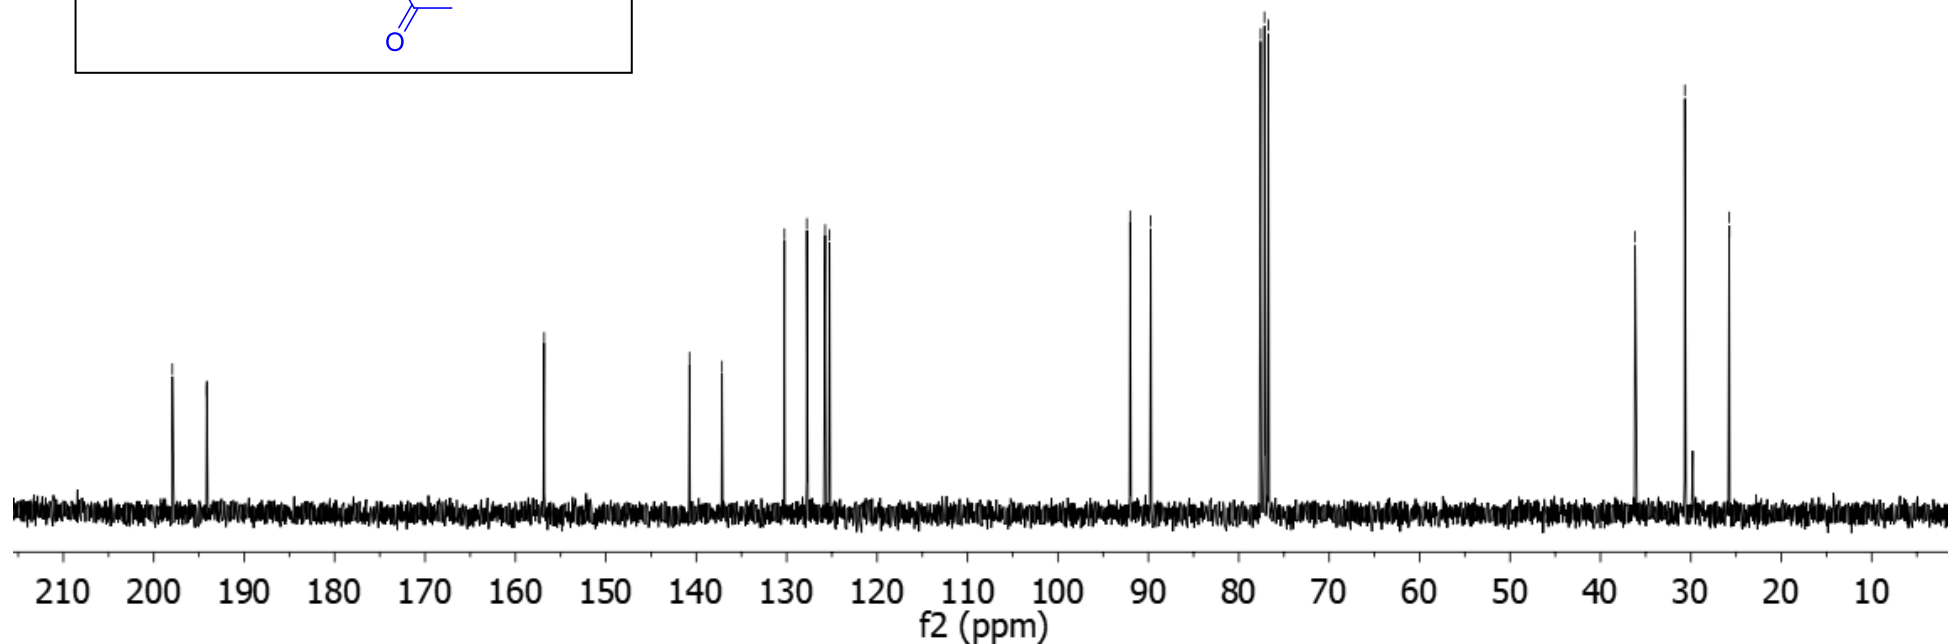

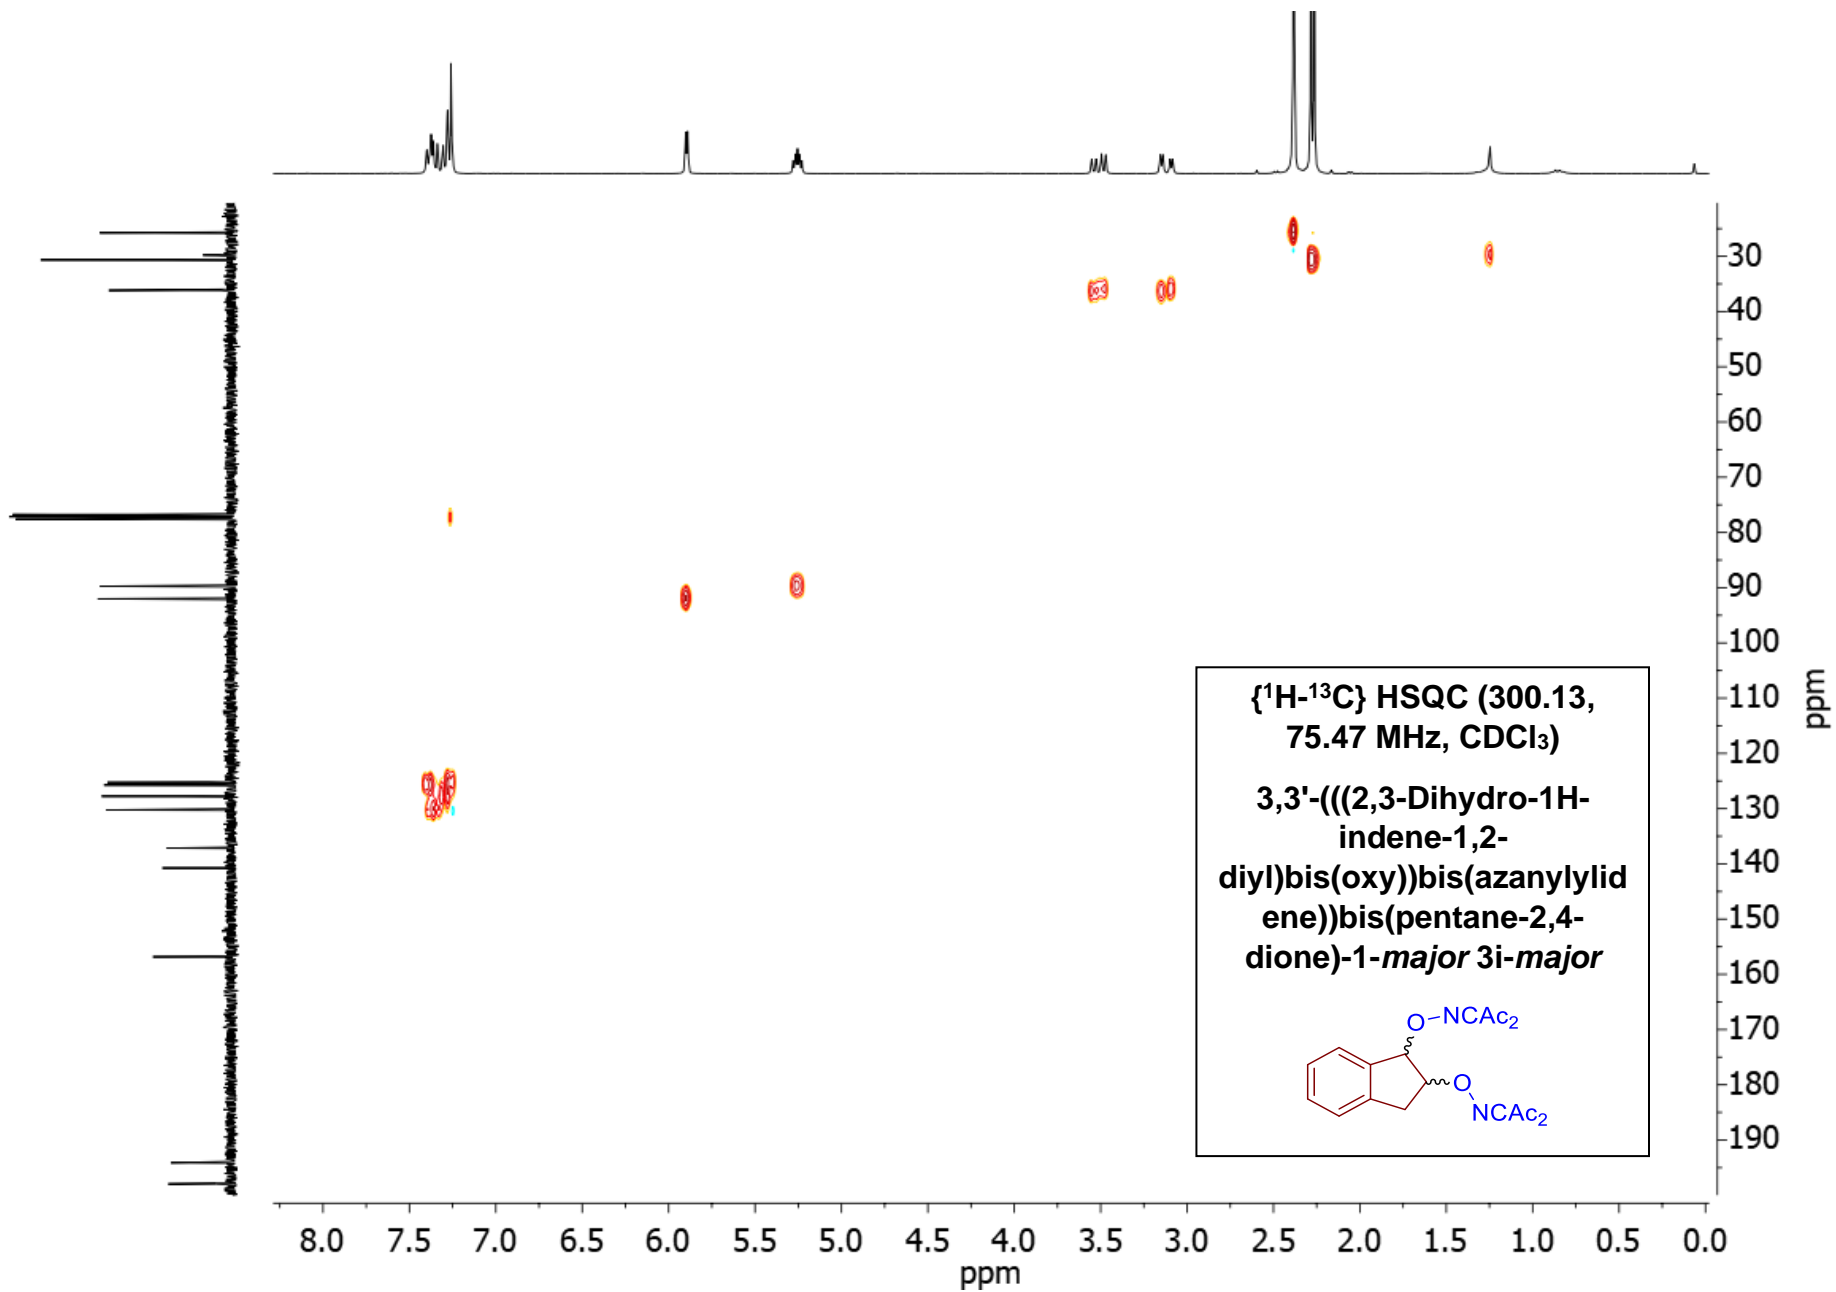

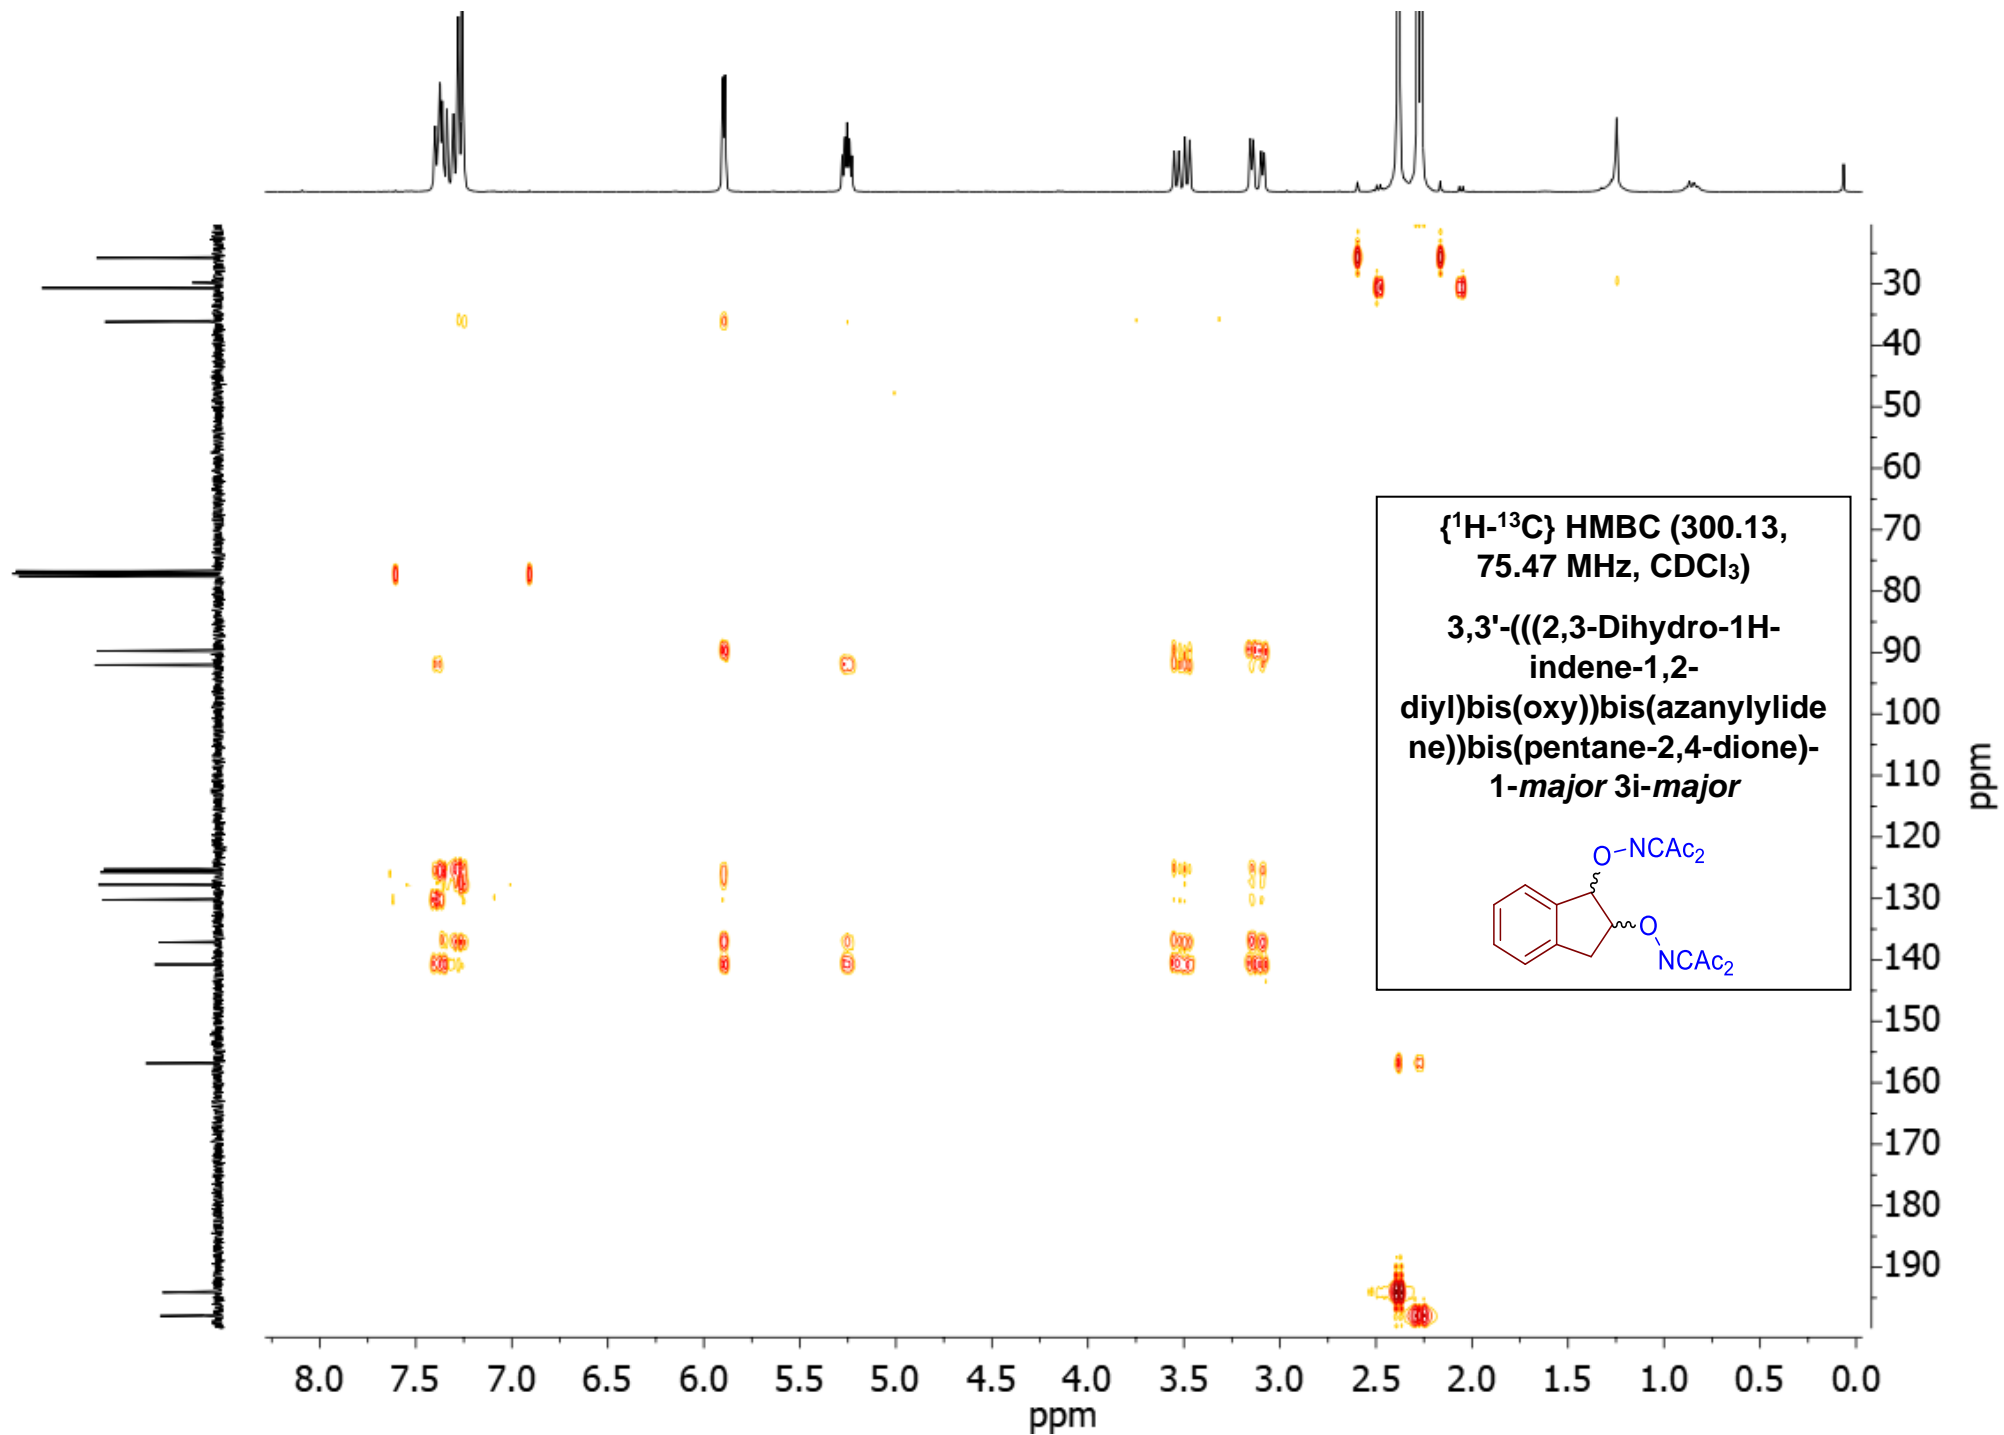

NOESY (300.13 MHz, CDCl<sub>3</sub>)

3,3'-(((2,3-Dihydro-1H-indene-1,2-diyloxy))bis(azanylylidene))bis(pentane-2,4-dione)-1-major 3i-major

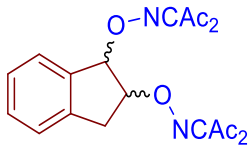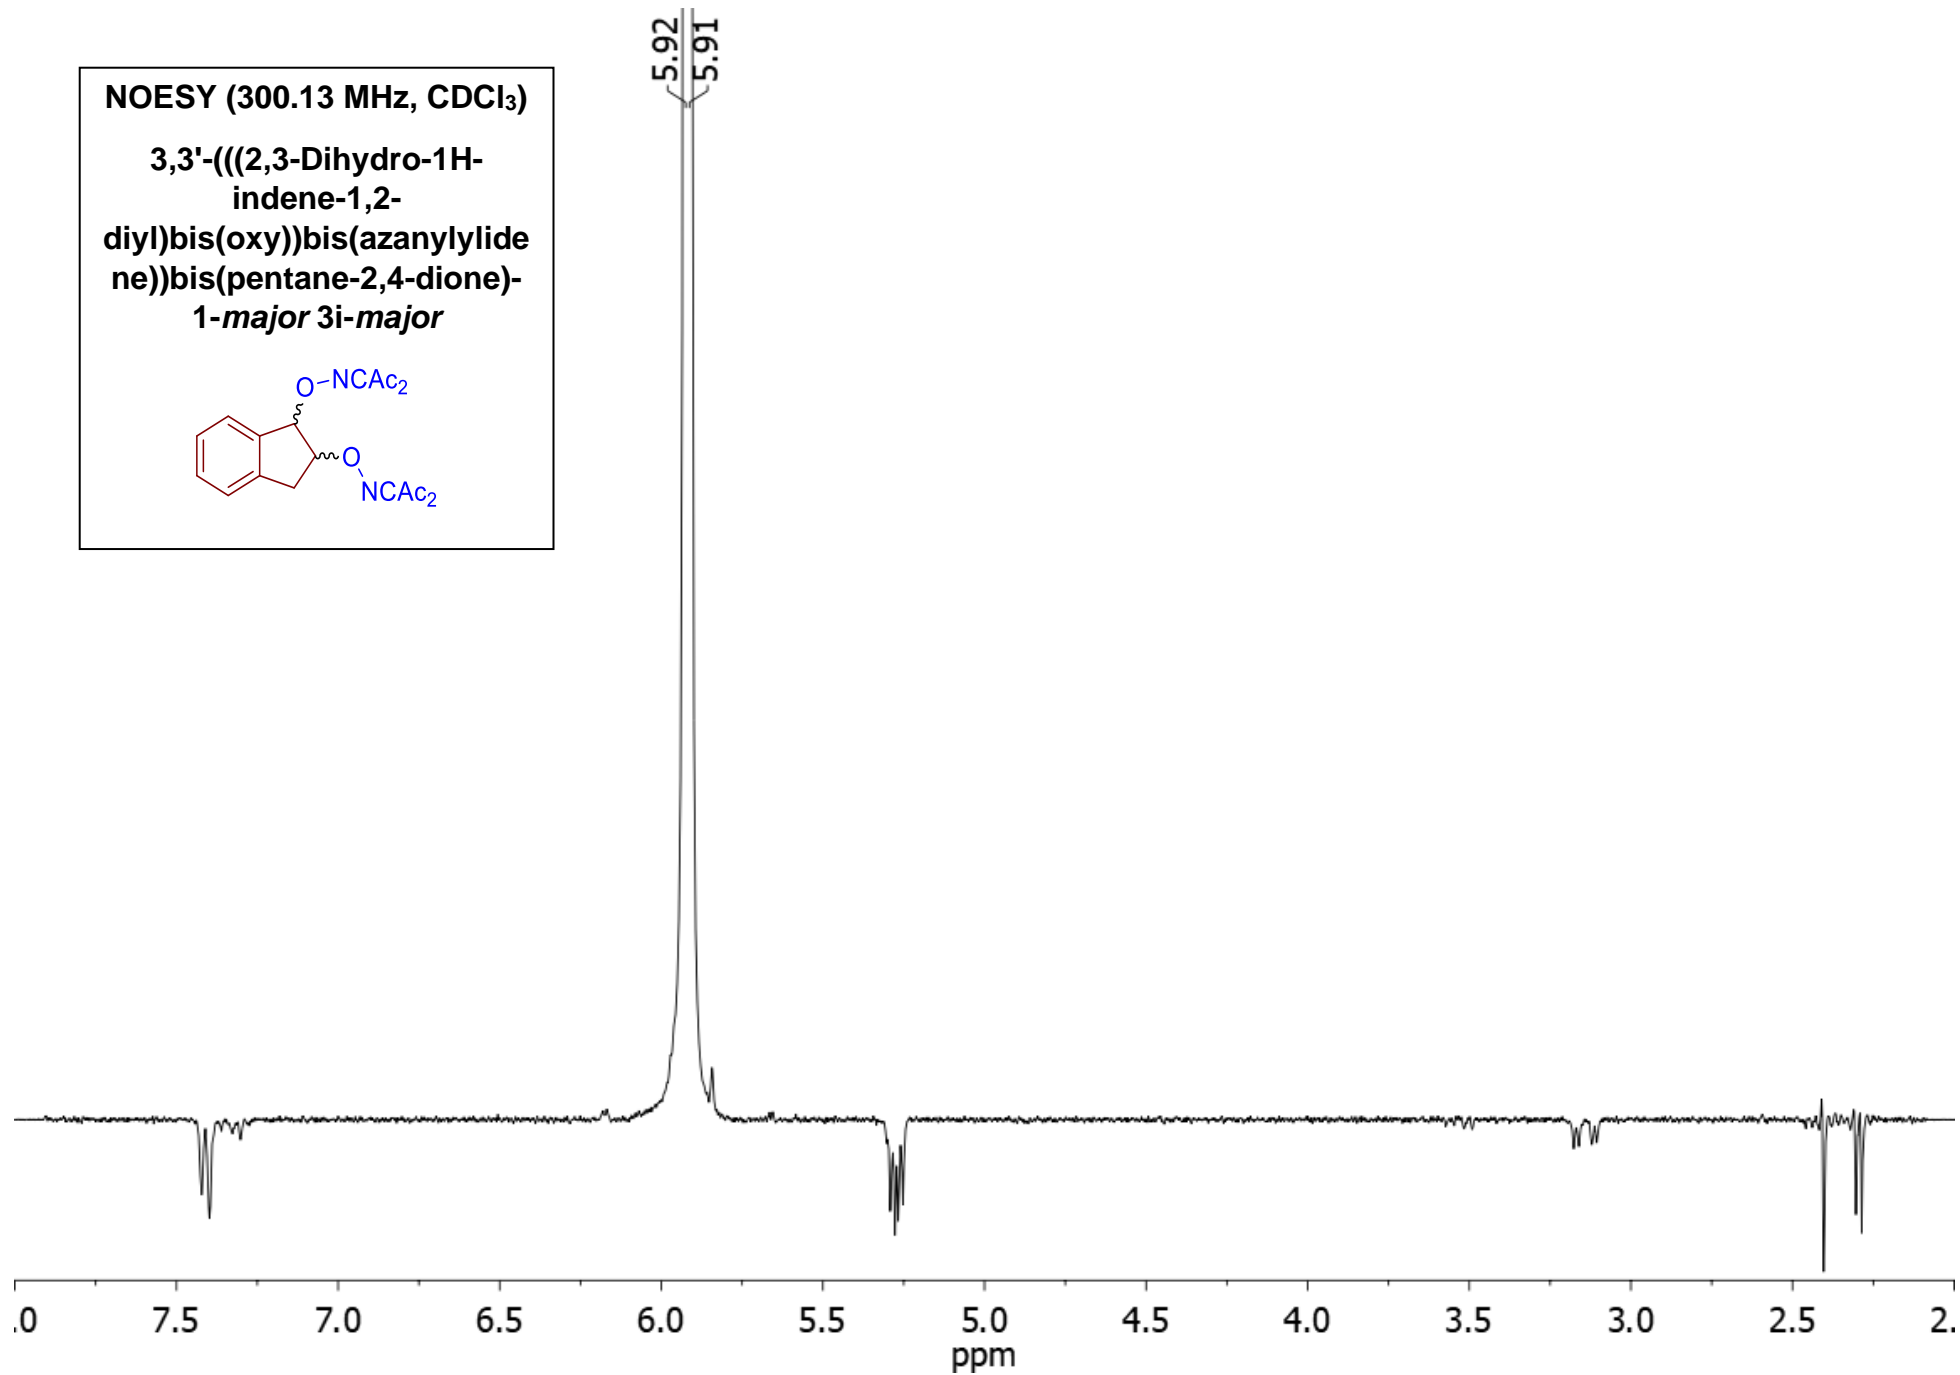



NOESY (300.13 MHz, CDCl<sub>3</sub>)

3,3'-(((2,3-Dihydro-1H-indene-1,2-diyl)bis(oxy))bis(azanylylidene))bis(pentane-2,4-dione)-1-major 3i-major

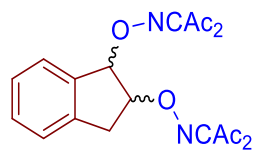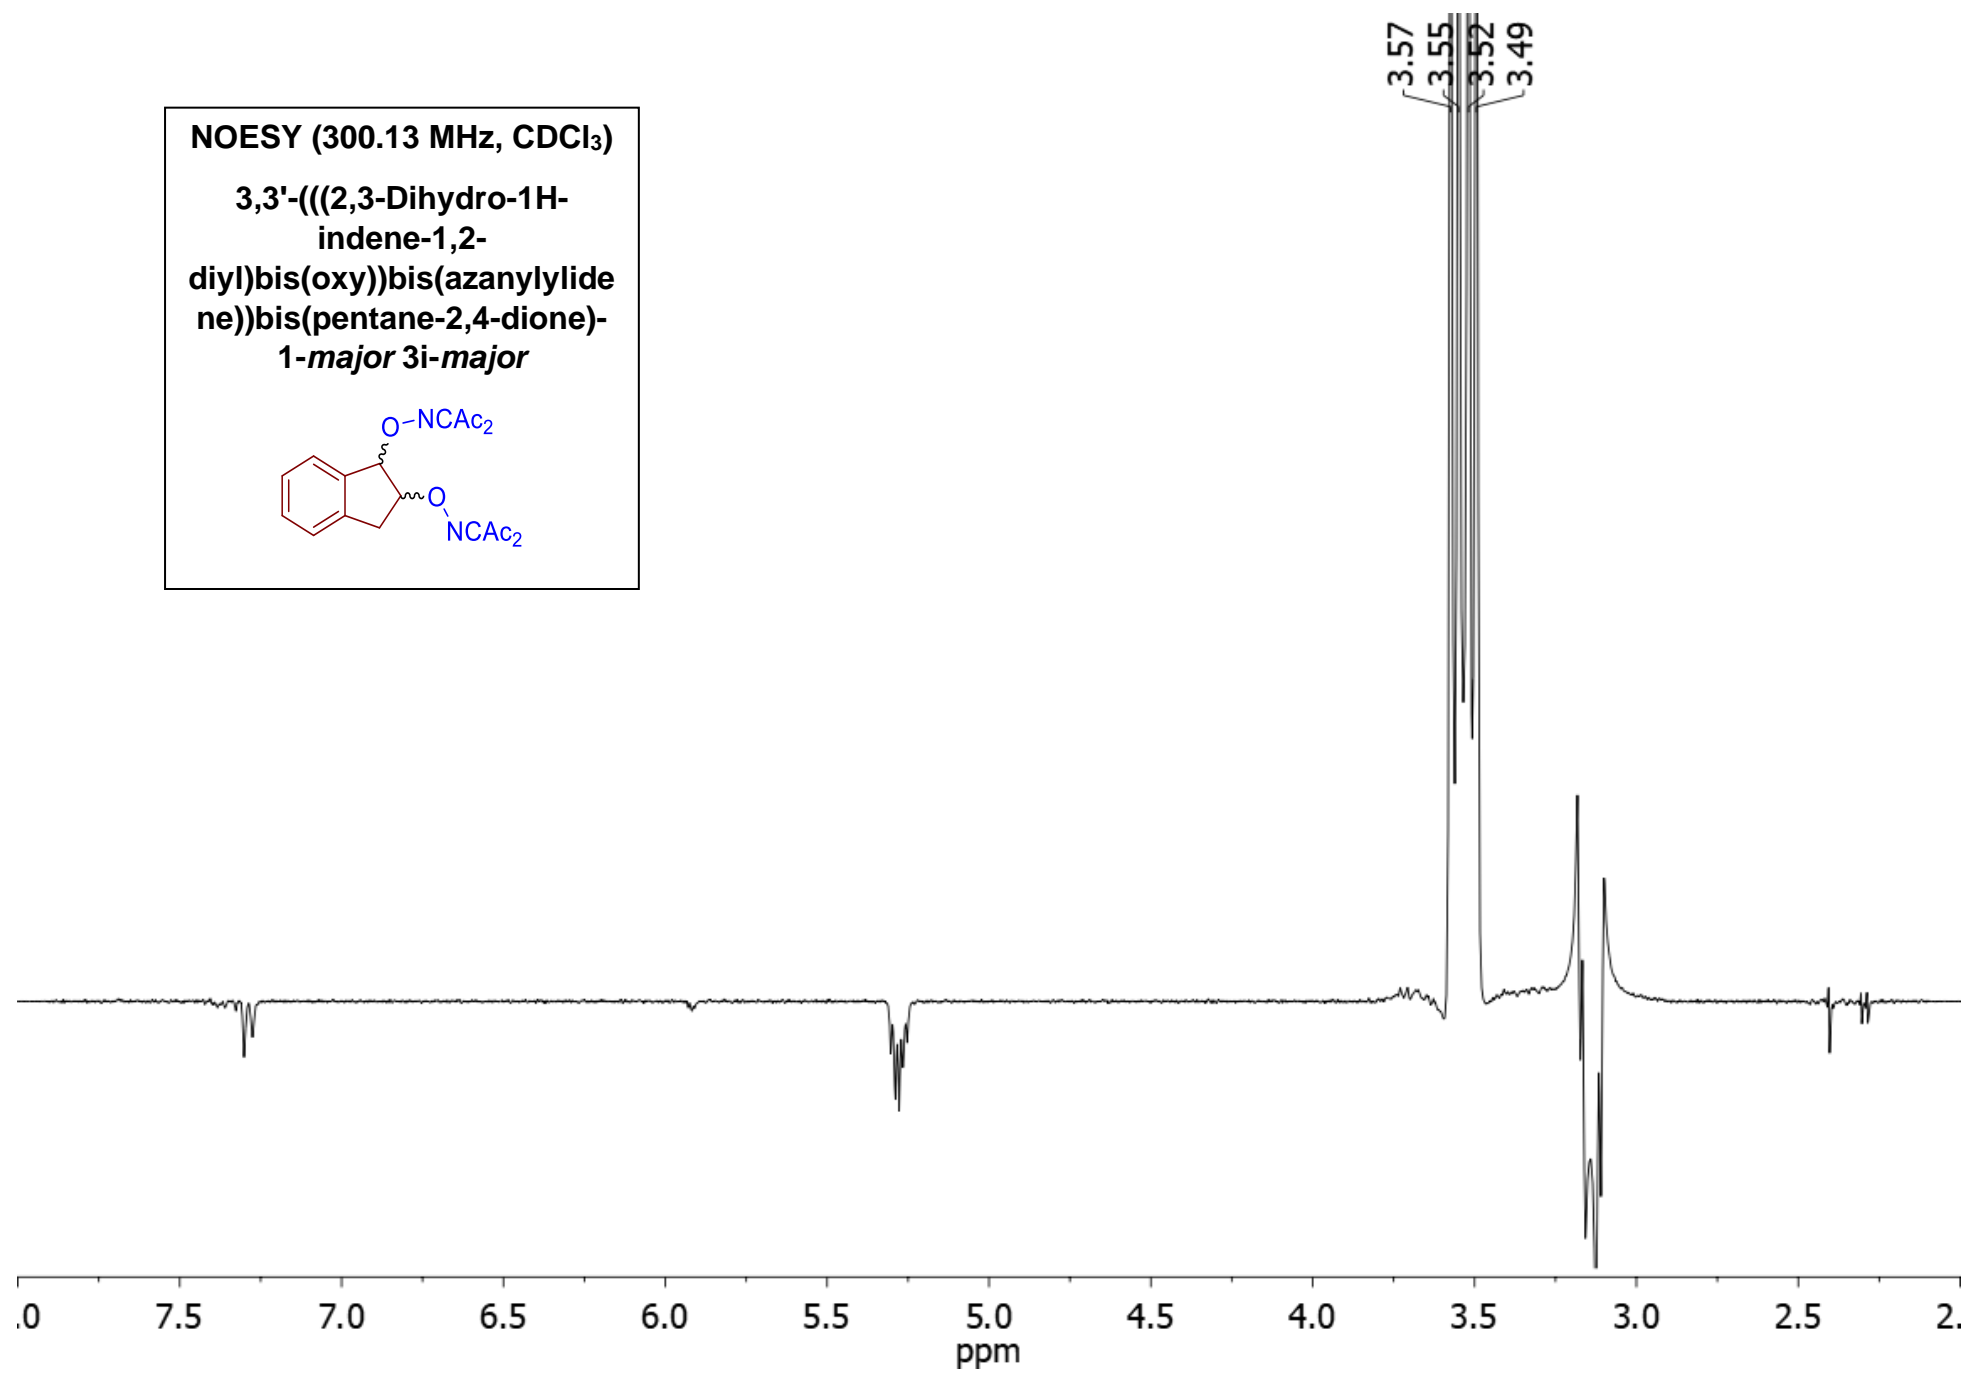



NOESY (300.13 MHz, CDCl<sub>3</sub>)

3,3'-(((2,3-Dihydro-1H-indene-1,2-diyloxy))bis(azanylylidene))bis(pentane-2,4-dione)-1-major 3i-major

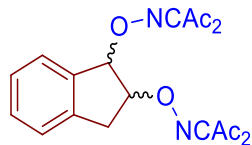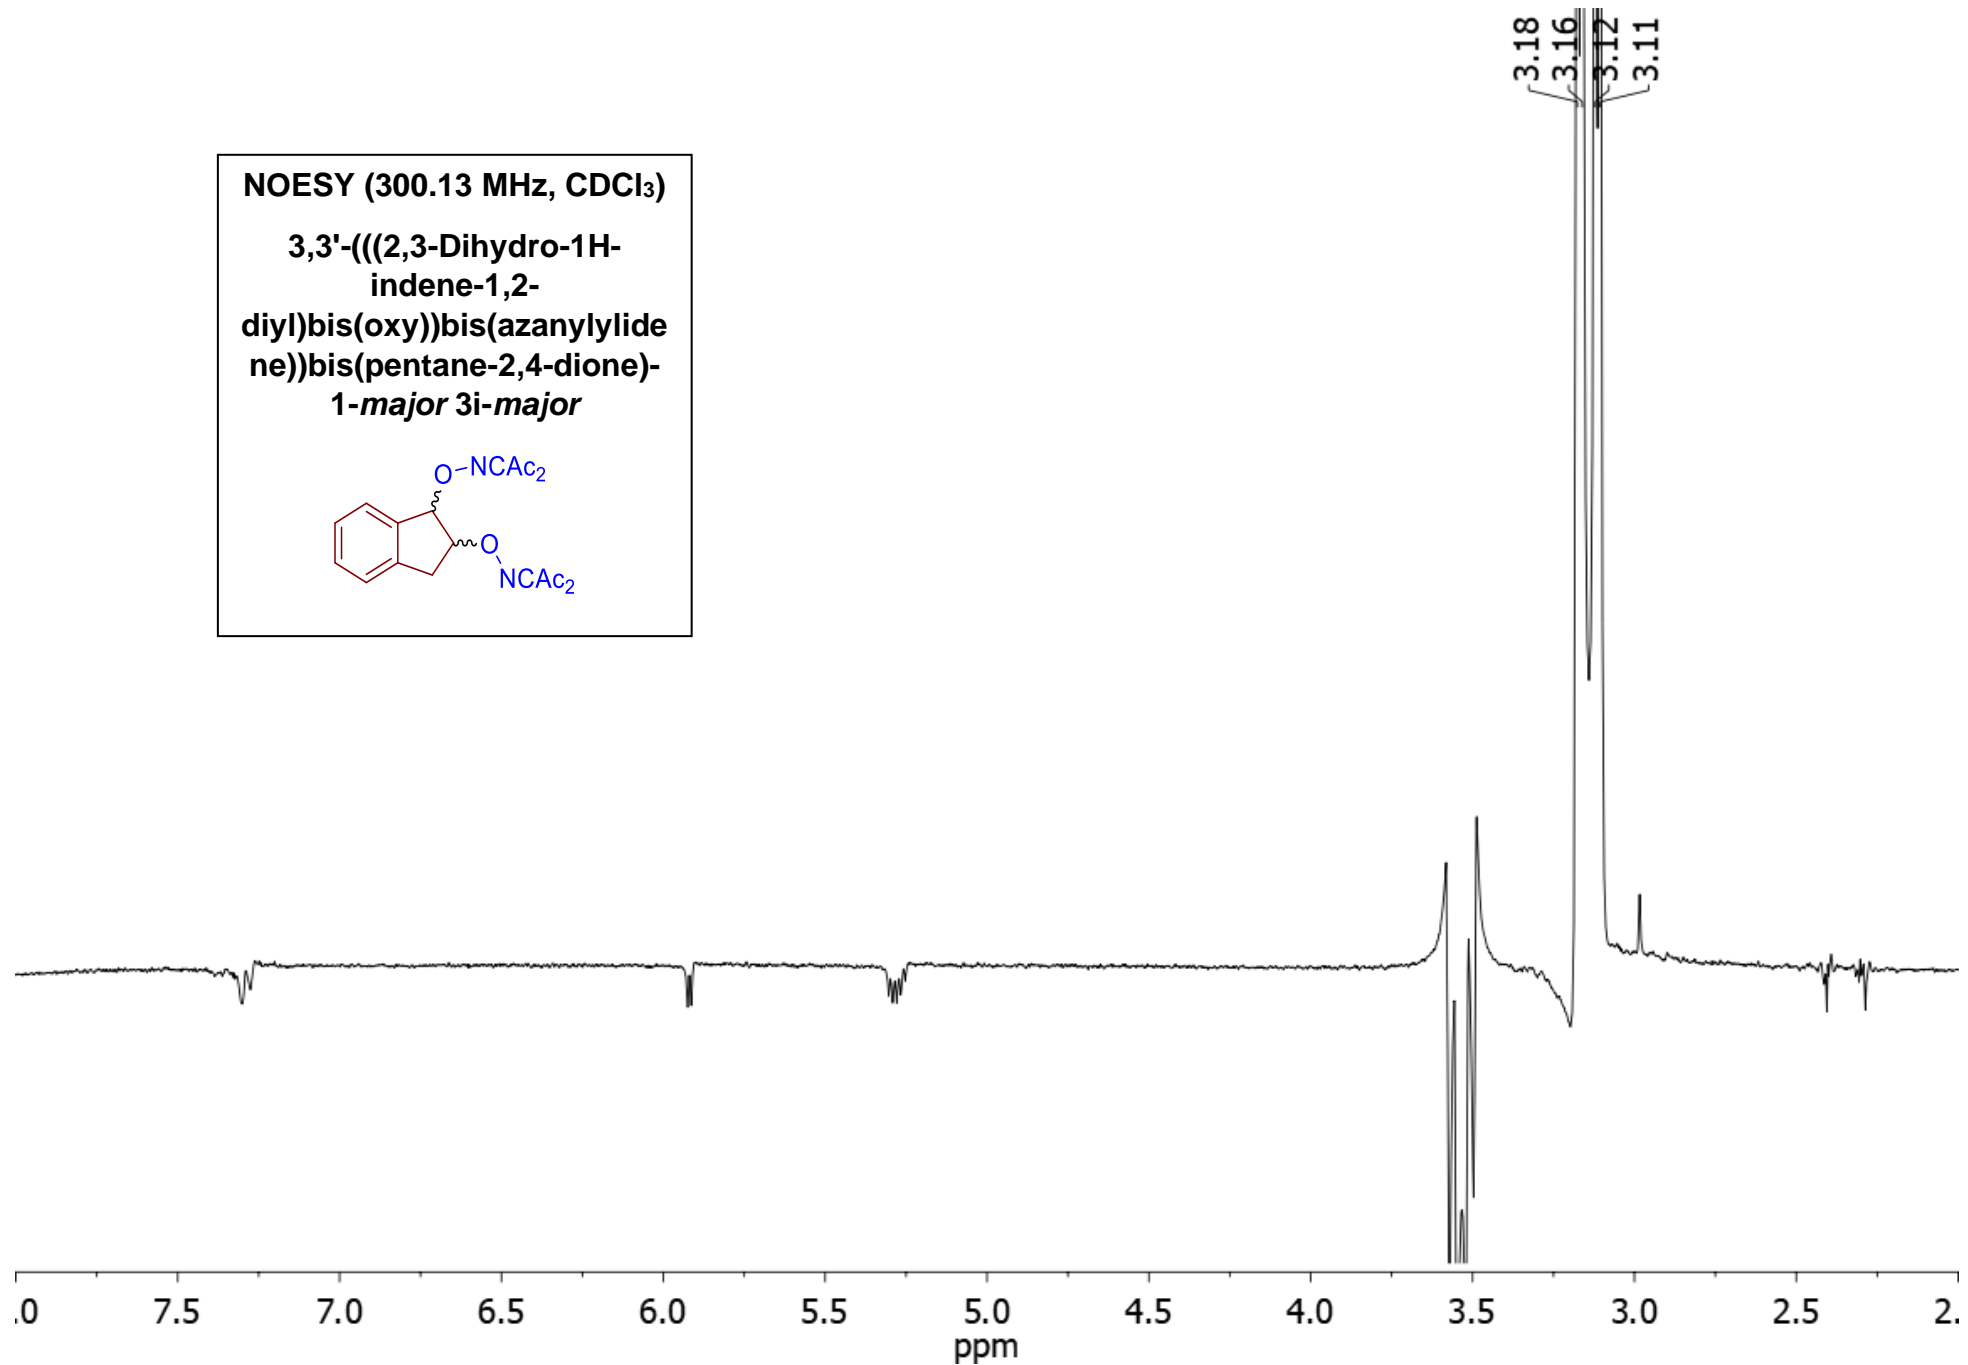

7.41  
7.38  
7.35  
7.31  
7.30  
7.29  
7.28

5.83  
5.82  
5.30  
5.28  
5.26  
5.23

3.30  
3.28  
3.26  
3.24  
2.38  
2.36  
2.21

<sup>1</sup>H NMR (300.13 MHz, CDCl<sub>3</sub>)

3,3'-(((2,3-Dihydro-1H-indene-1,2-diyl)bis(oxy))bis(azanylylidene))bis(pentane-2,4-dione)-2-*minor* 3i-*minor*

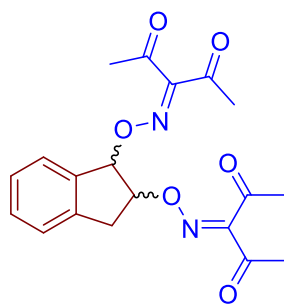

|    |                        |                              |
|----|------------------------|------------------------------|
| 1  | Title                  | i8125- <sup>1</sup> H}.1.fid |
| 2  | Solvent                | CDCl <sub>3</sub>            |
| 3  | Temperature            | 301.0                        |
| 4  | Pulse Sequence         | zg                           |
| 5  | Number of Scans        | 4                            |
| 6  | Receiver Gain          | 14.2                         |
| 7  | Relaxation Delay       | 0.0050                       |
| 8  | Pulse Width            | 9.0000                       |
| 9  | Acquisition Time       | 1.3518                       |
| 10 | Spectrometer Frequency | 300.13                       |
| 11 | Spectral Width         | 6009.6                       |
| 12 | Lowest Frequency       | -610.8                       |
| 13 | Nucleus                | <sup>1</sup> H               |
| 14 | Acquired Size          | 8124                         |
| 15 | Spectral Size          | 65536                        |

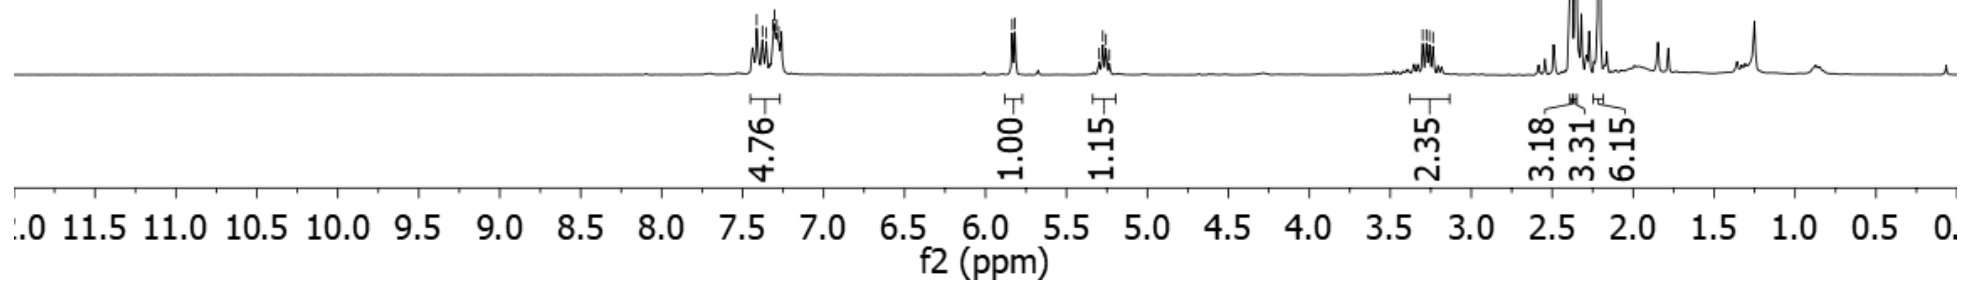

197.92  
194.04

156.46  
156.39  
140.20  
137.12  
130.50  
127.78  
126.18  
125.33

87.11  
85.36  
77.59  
77.16  
76.74

35.57  
30.50  
25.63  
25.60

<sup>13</sup>C NMR (75.47 MHz, CDCl<sub>3</sub>)

3,3'-(((2,3-Dihydro-1H-indene-1,2-diyloxy))bis(azanylylidene))bis(pentane-2,4-dione)-2-minor 3i-minor

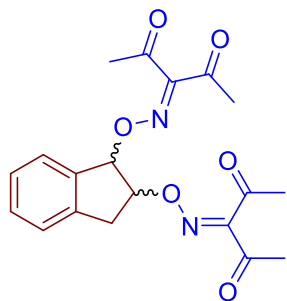

|    |                        |                               |
|----|------------------------|-------------------------------|
| 1  | Title                  | i8604- <sup>13</sup> C-13.fid |
| 2  | Solvent                | CDCl <sub>3</sub>             |
| 3  | Temperature            | 301.9                         |
| 4  | Pulse Sequence         | zgpg30                        |
| 5  | Number of Scans        | 919                           |
| 6  | Receiver Gain          | 3250.0                        |
| 7  | Relaxation Delay       | 1.0000                        |
| 8  | Pulse Width            | 13.0000                       |
| 9  | Acquisition Time       | 0.9002                        |
| 10 | Spectrometer Frequency | 75.48                         |
| 11 | Spectral Width         | 18115.9                       |
| 12 | Lowest Frequency       | -745.9                        |
| 13 | Nucleus                | <sup>13</sup> C               |
| 14 | Acquired Size          | 16308                         |
| 15 | Spectral Size          | 65536                         |

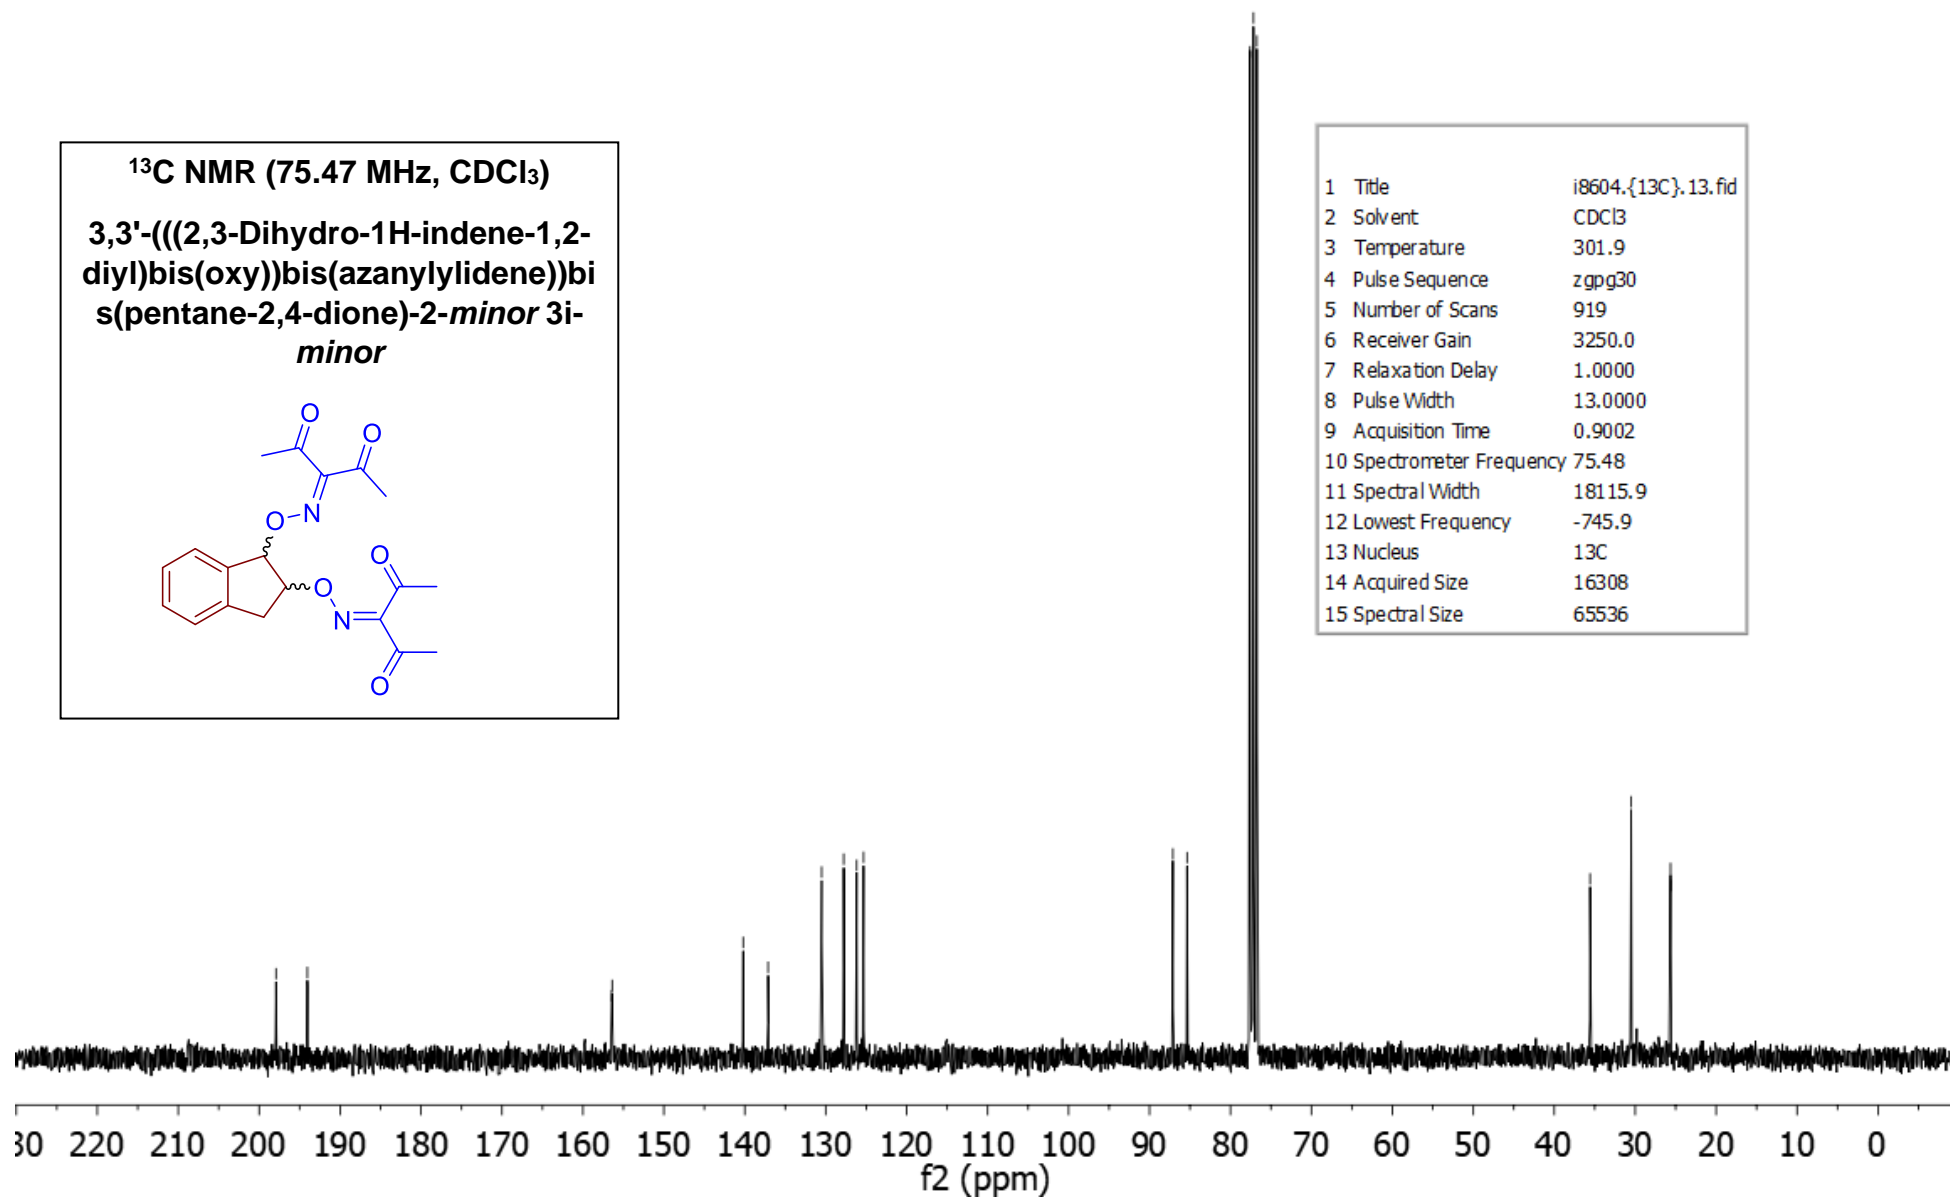

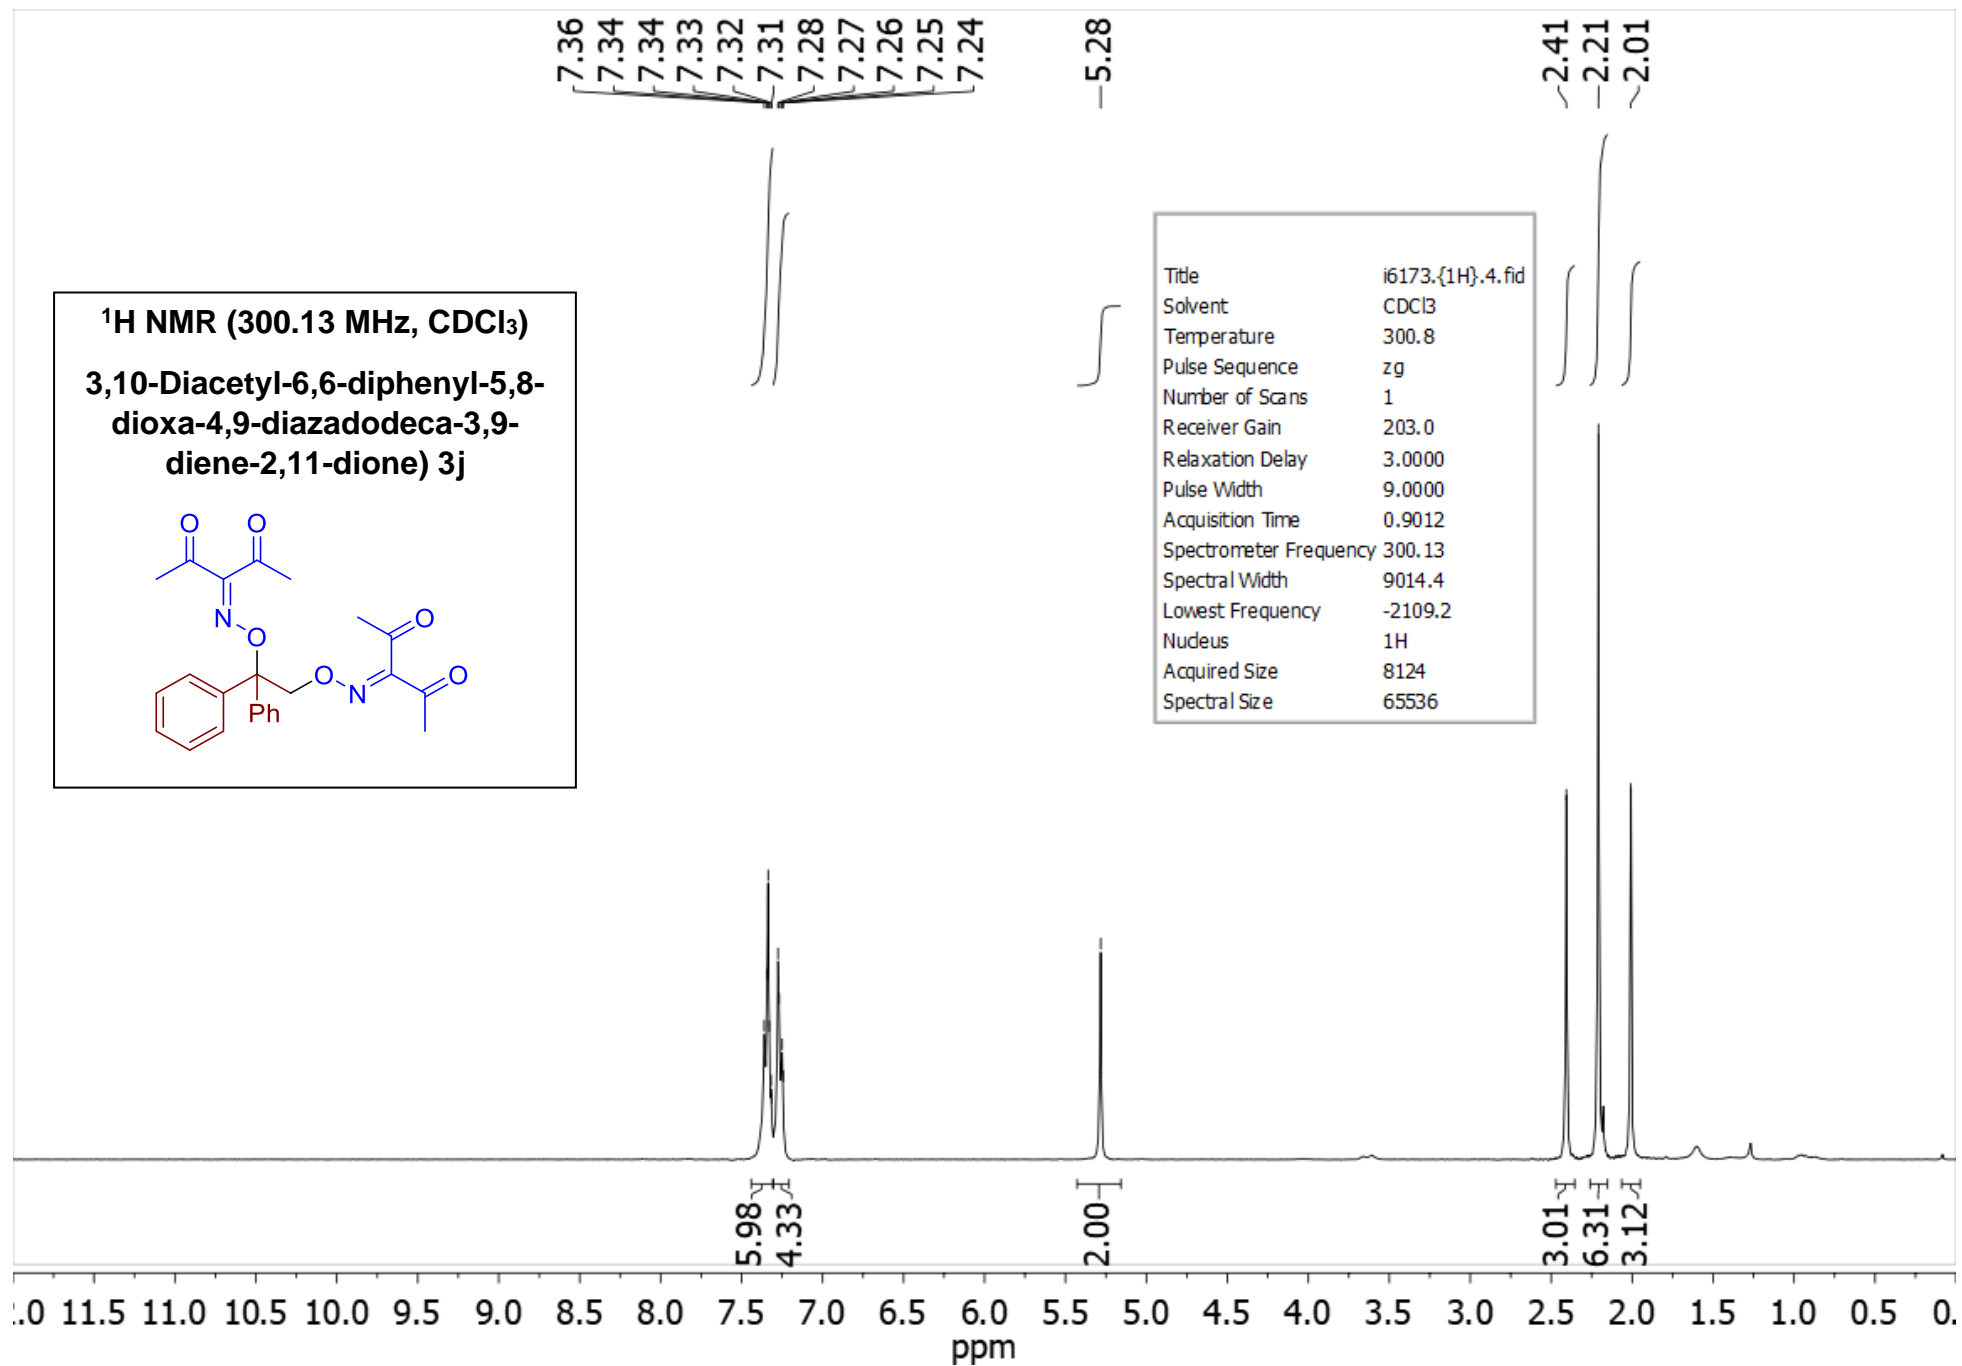

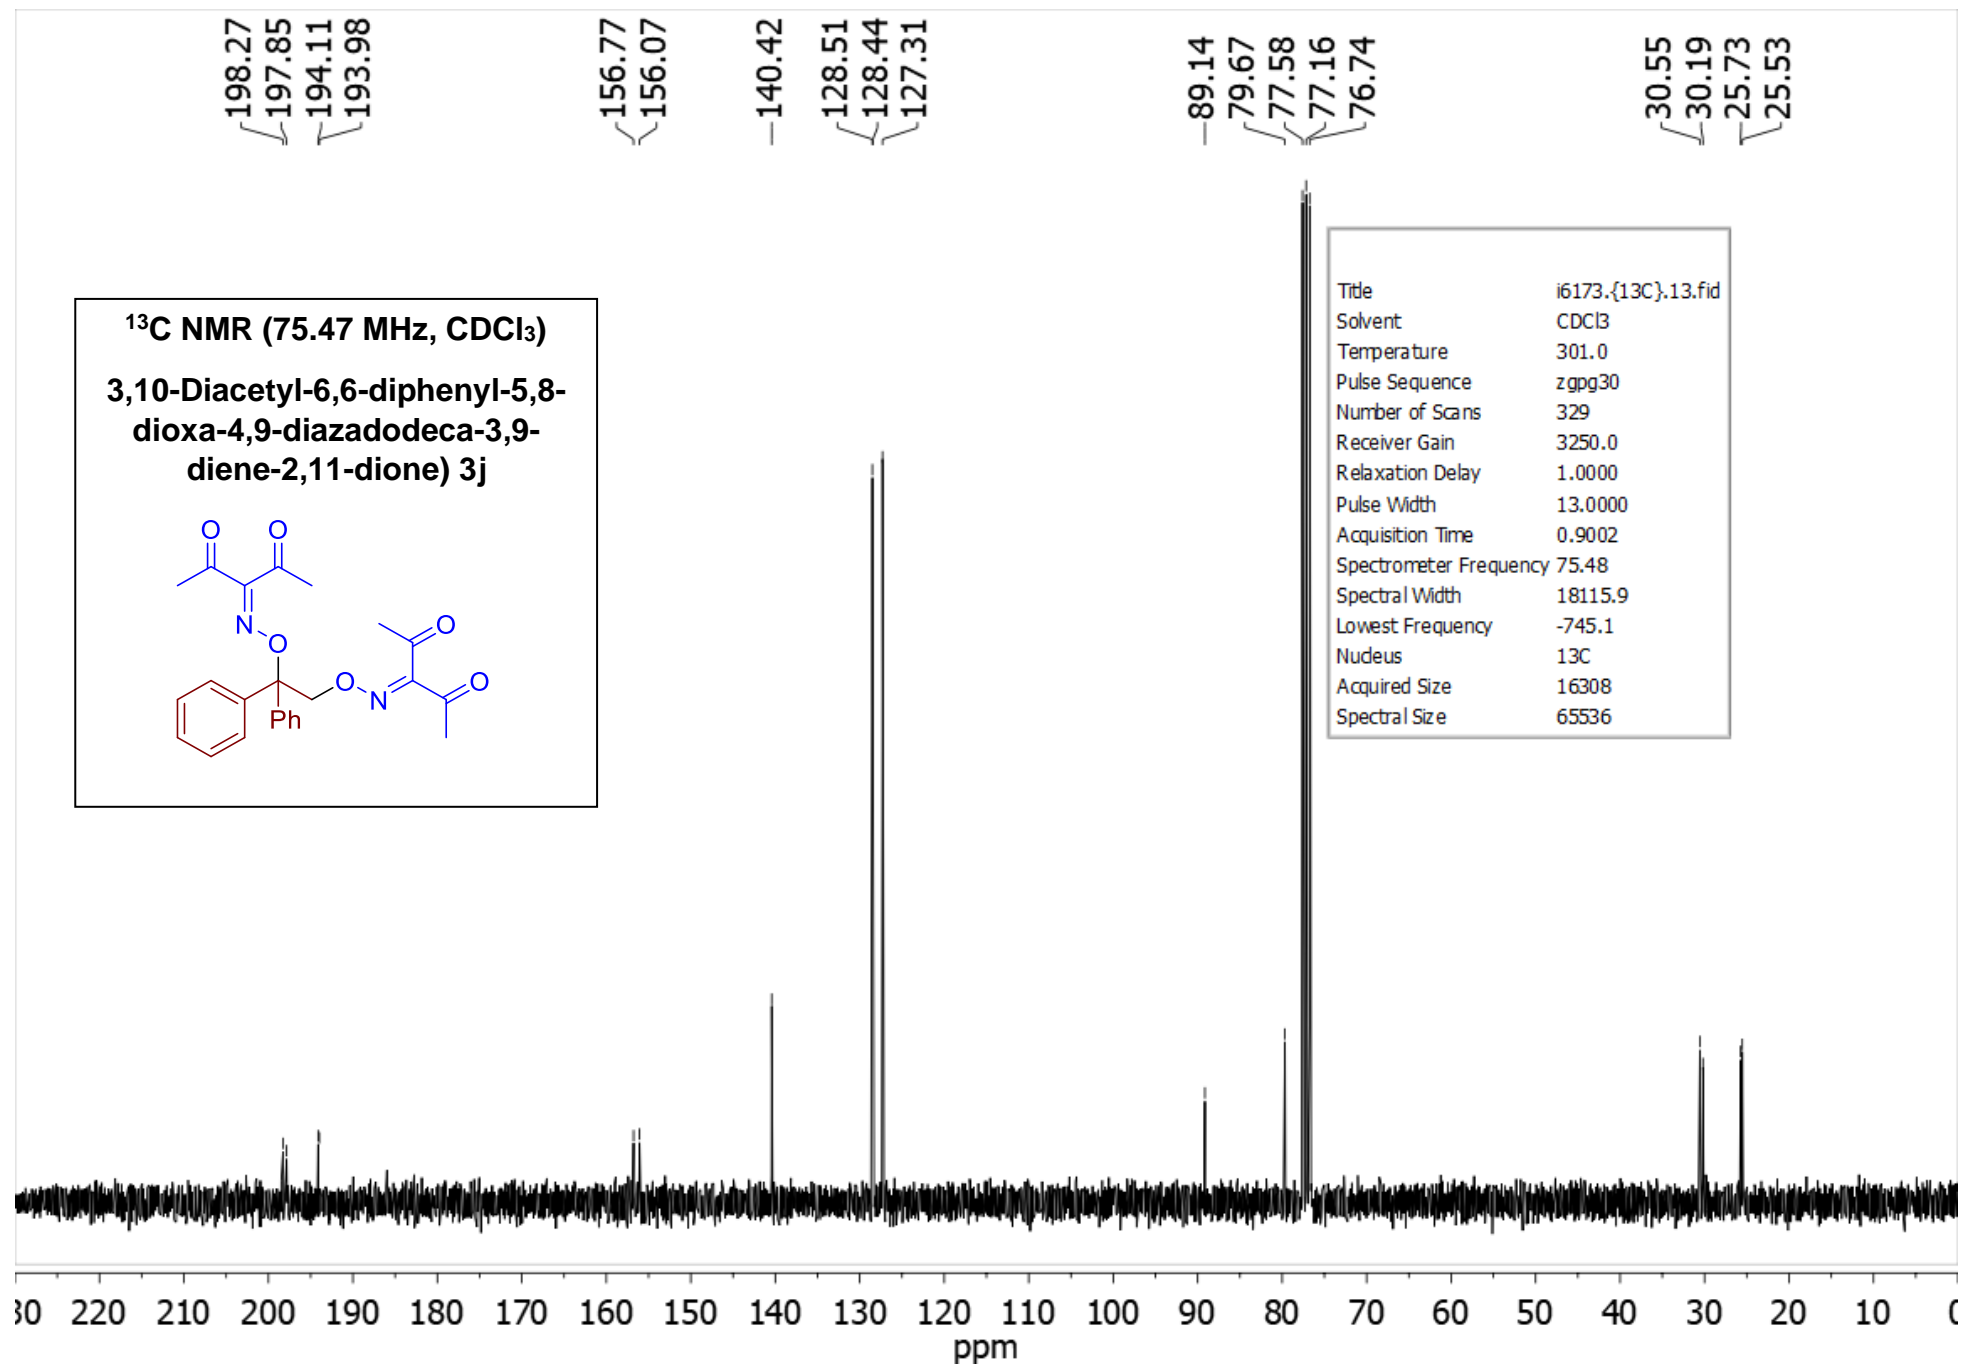

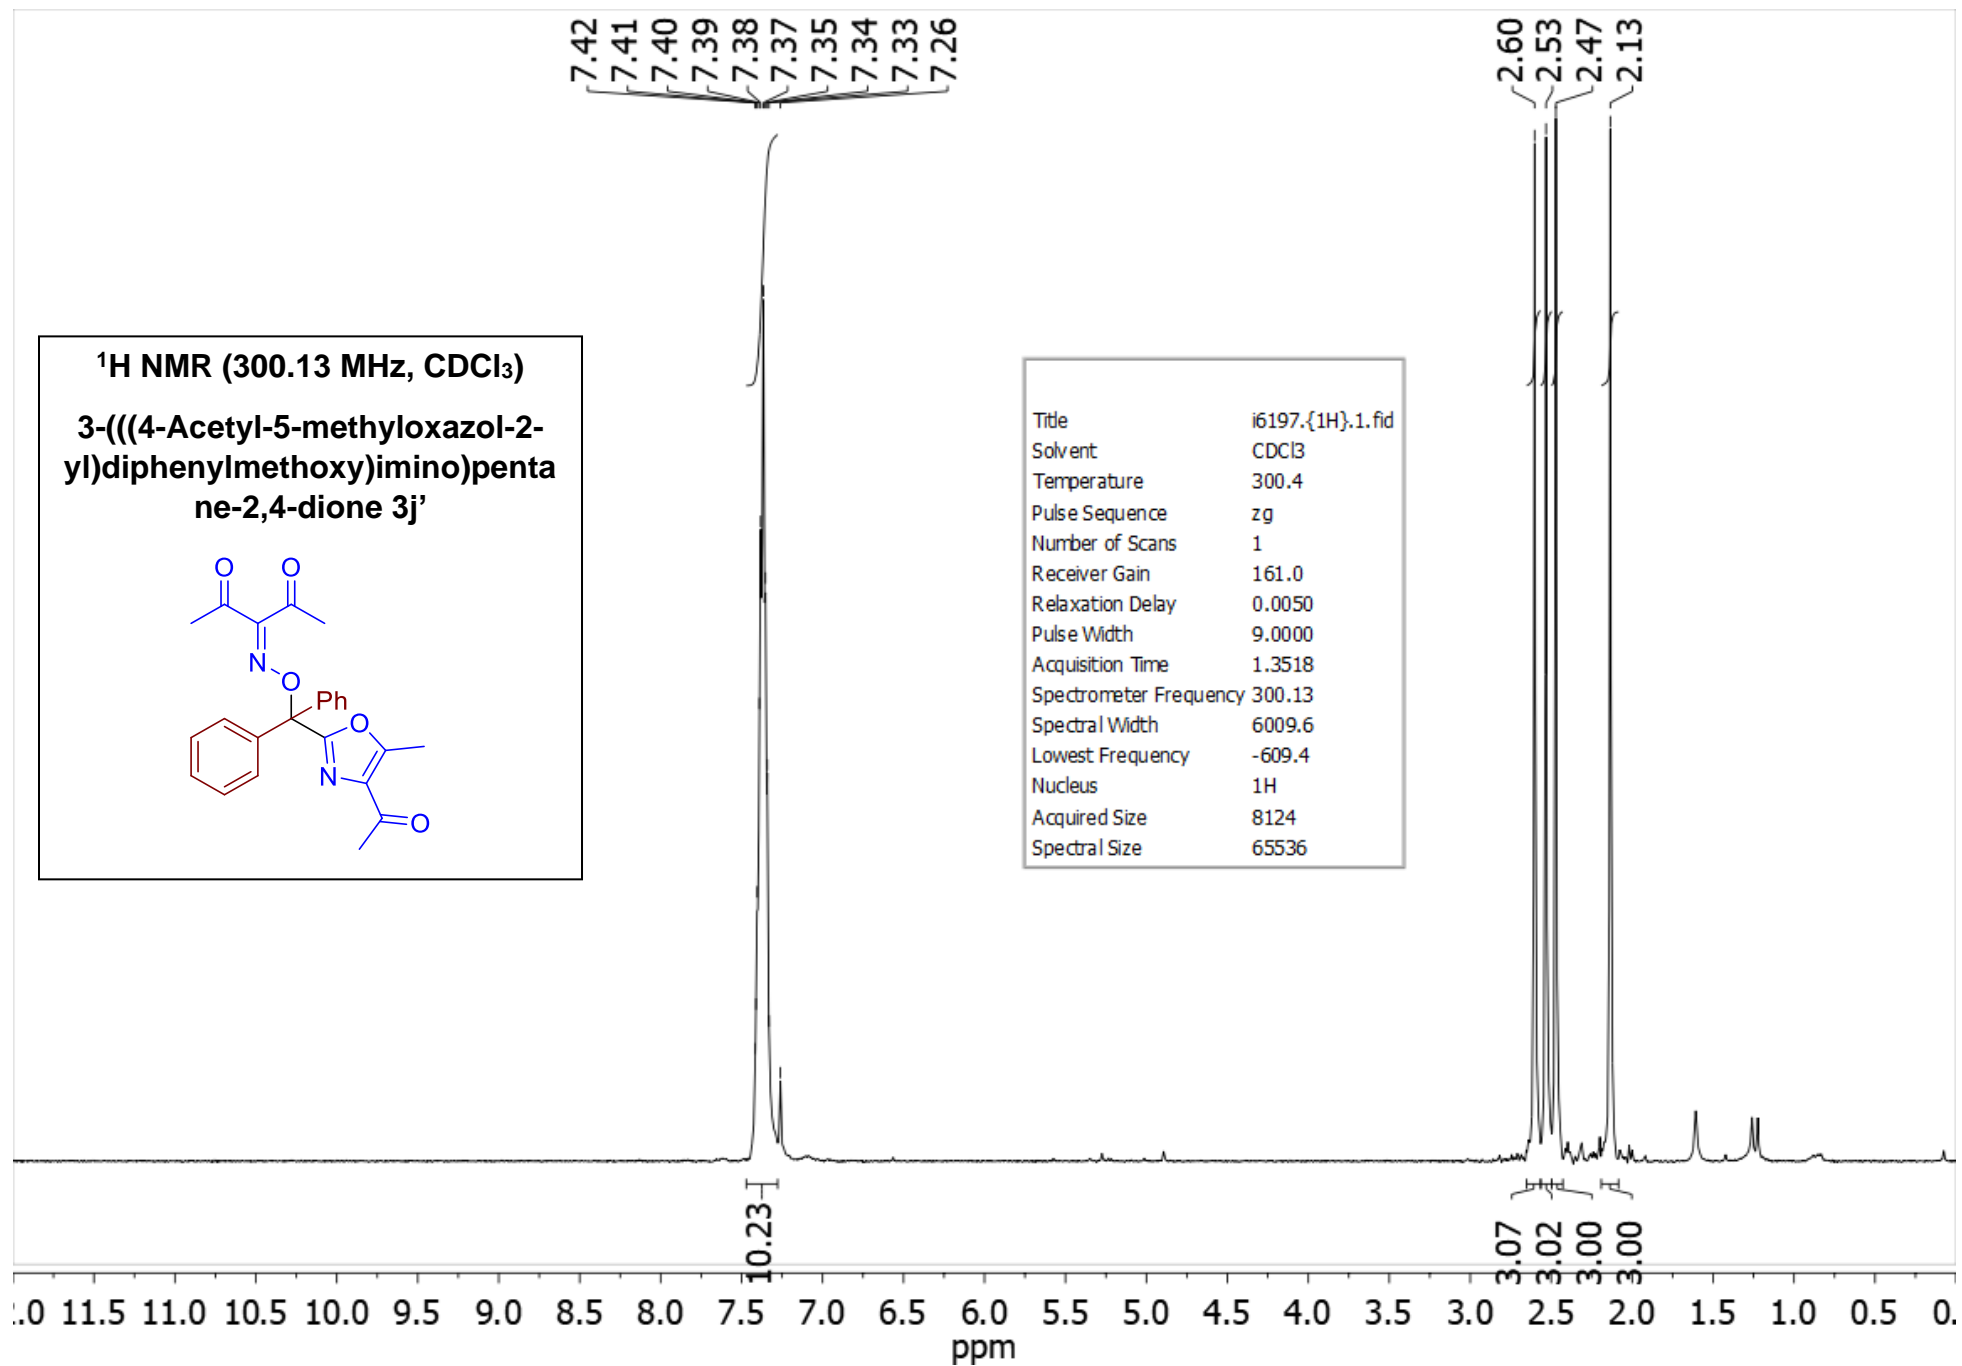

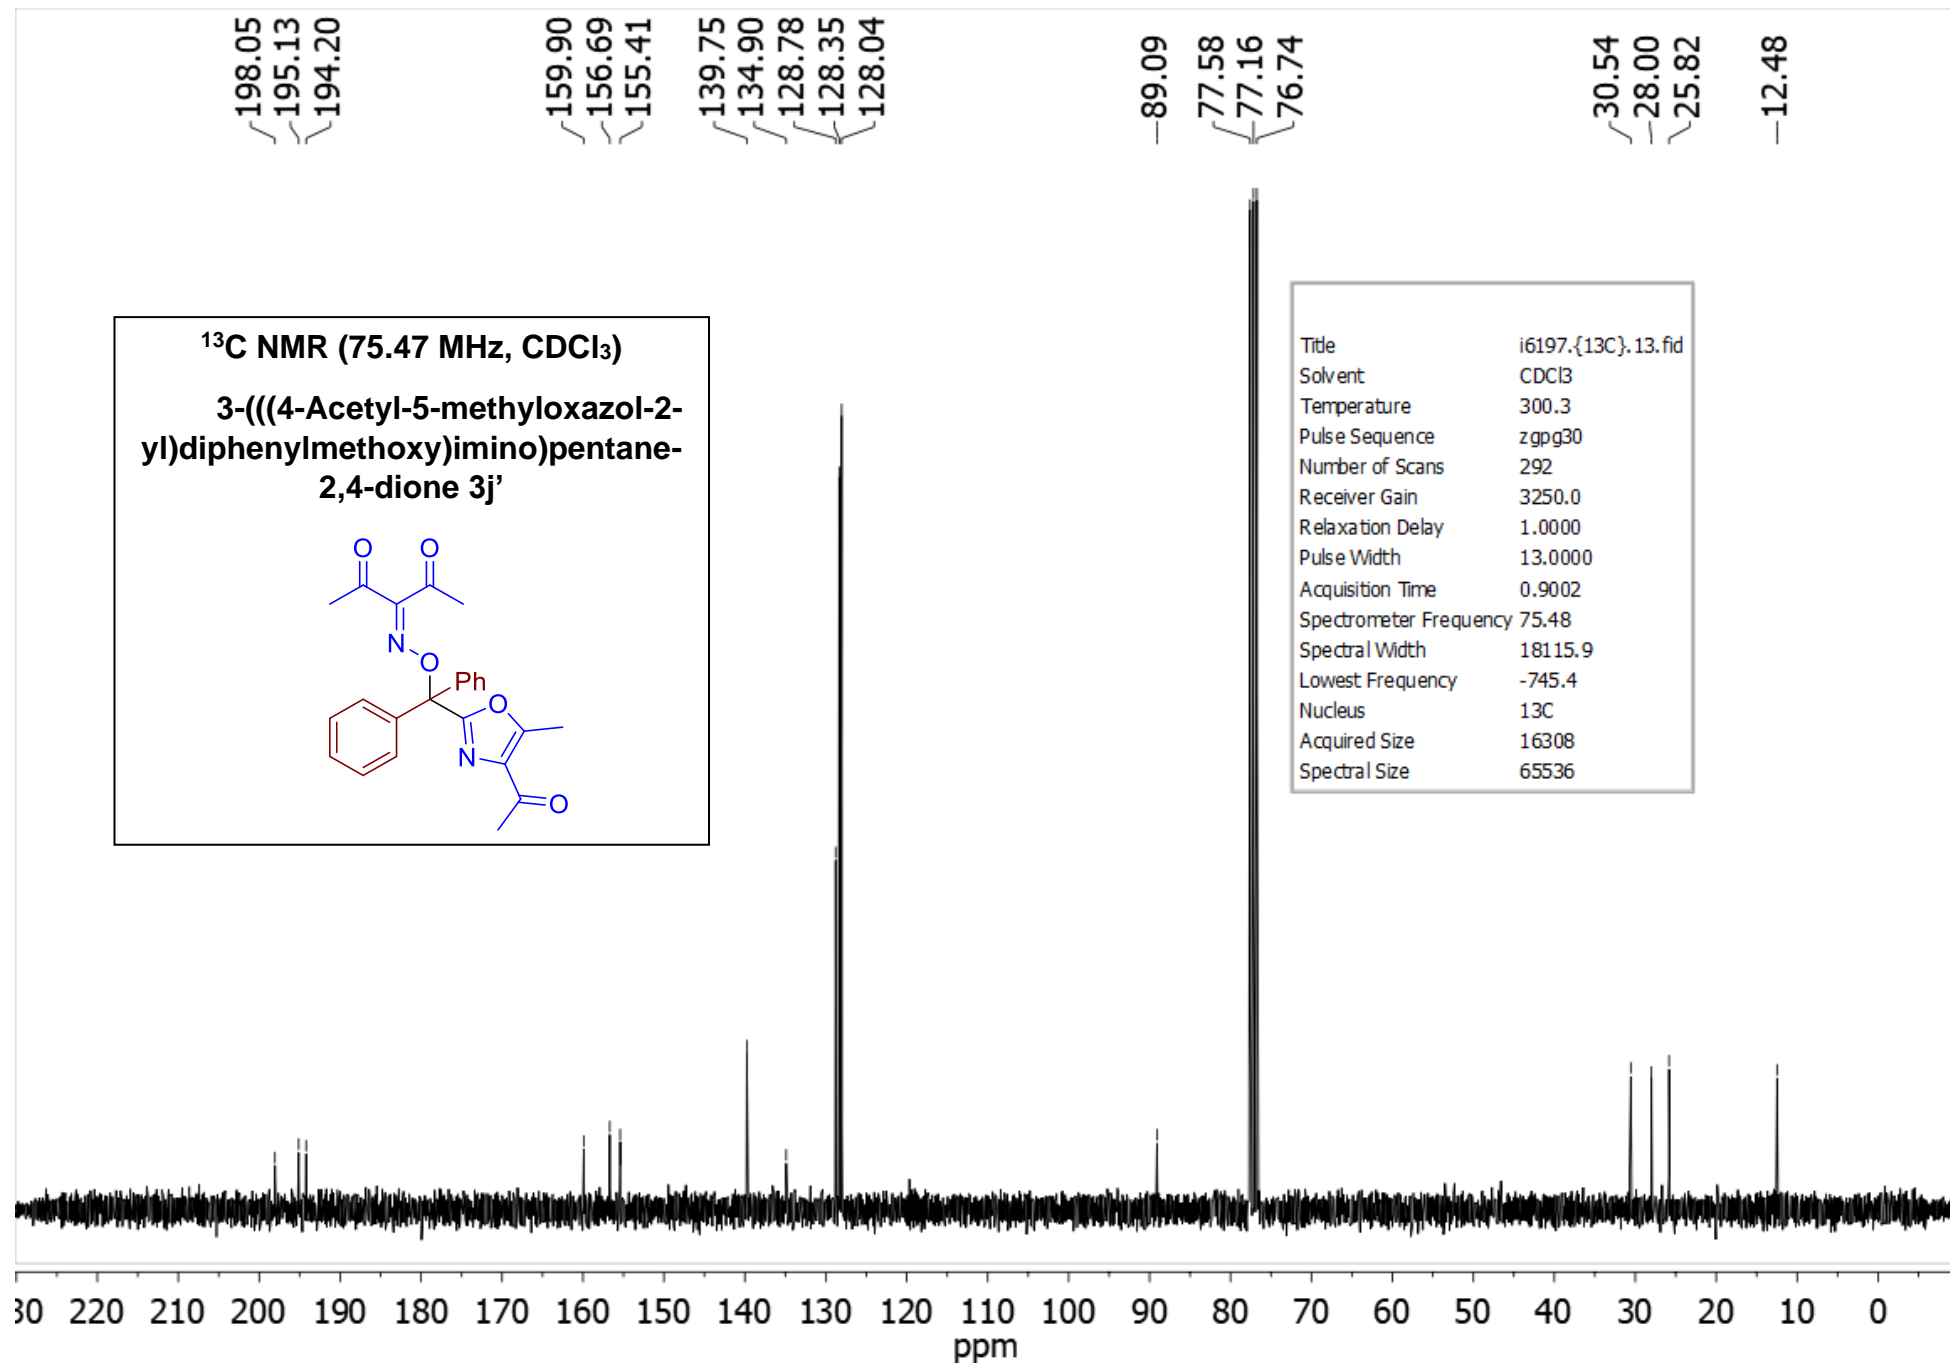

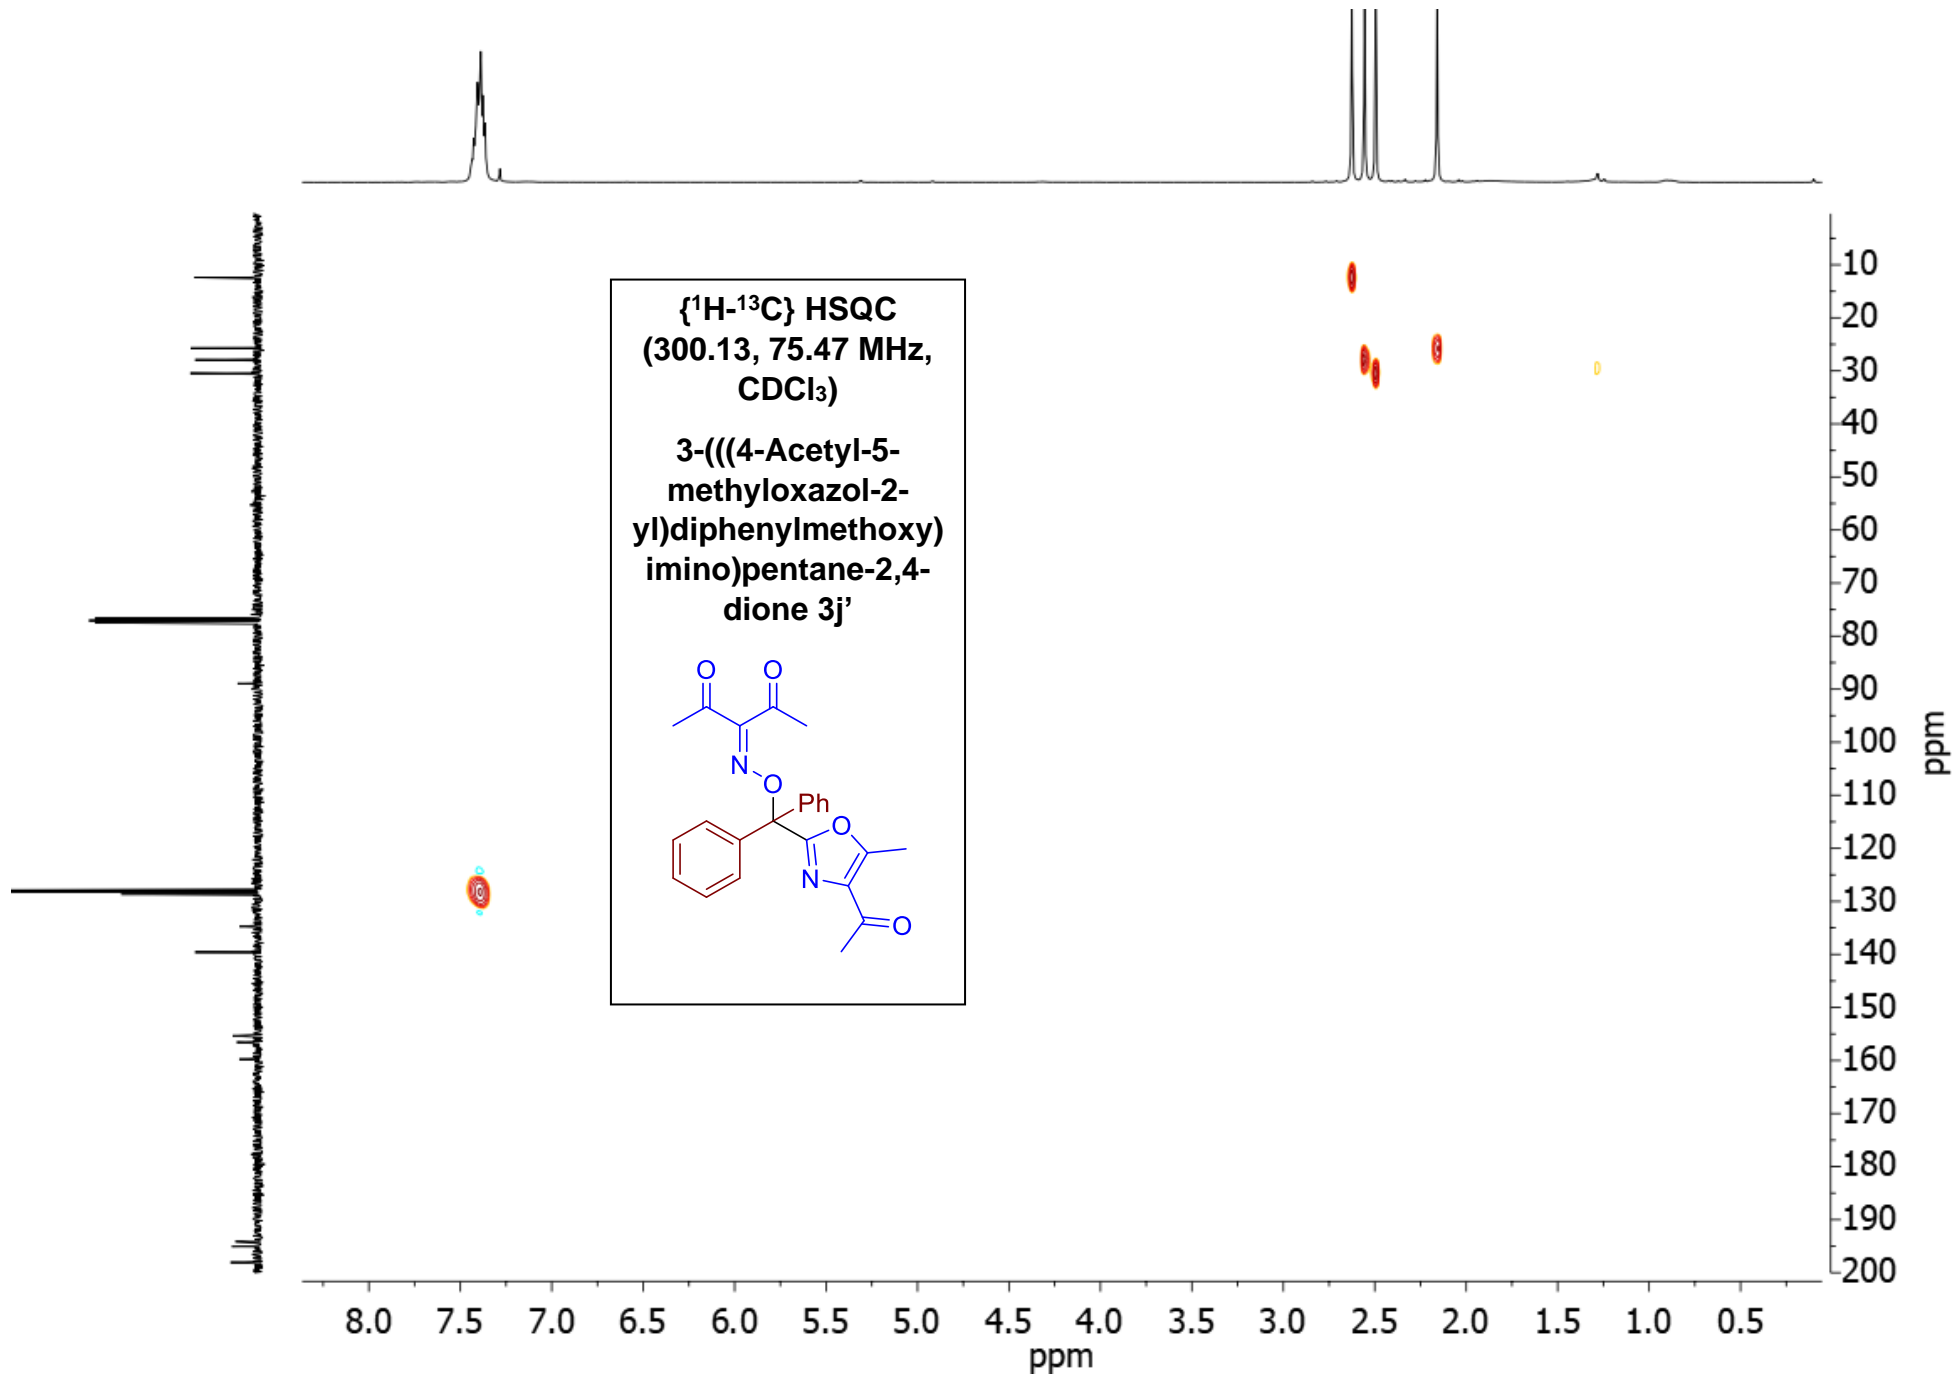



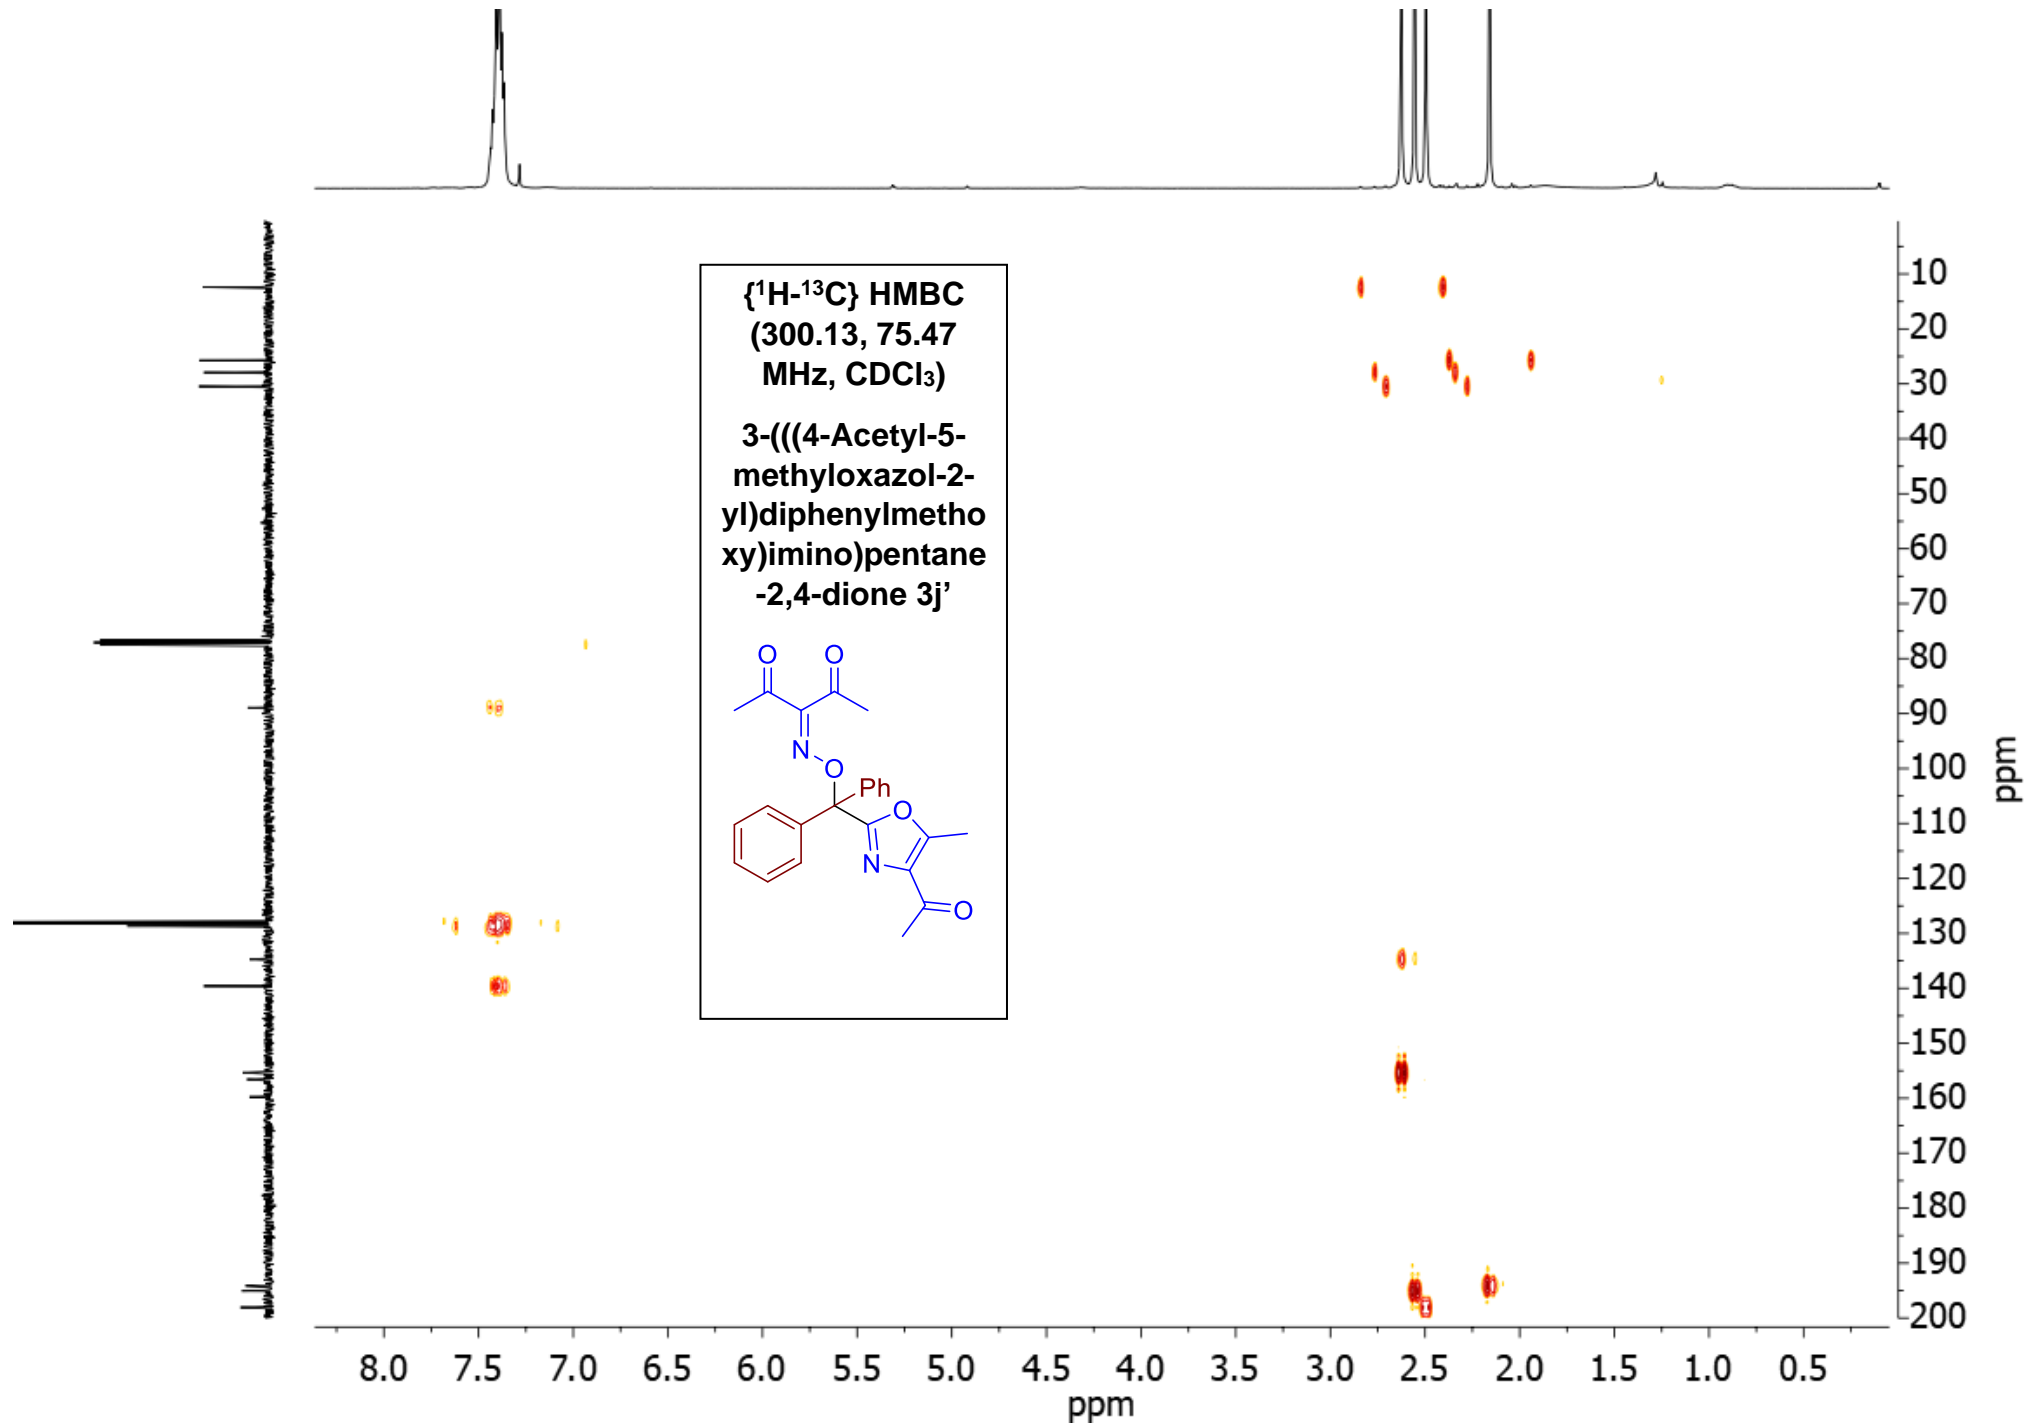

**<sup>1</sup>H NMR (300.13 MHz, CDCl<sub>3</sub>)**  
**3,3'-(((3,3,3-Trifluoro-2-phenylpropane-1,2-diyl)bis(oxy))bis(azanylylidene))bis(pentane-2,4-dione 3k**

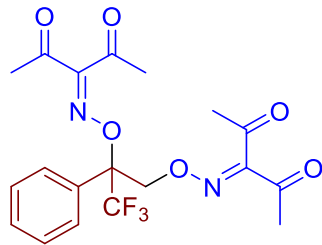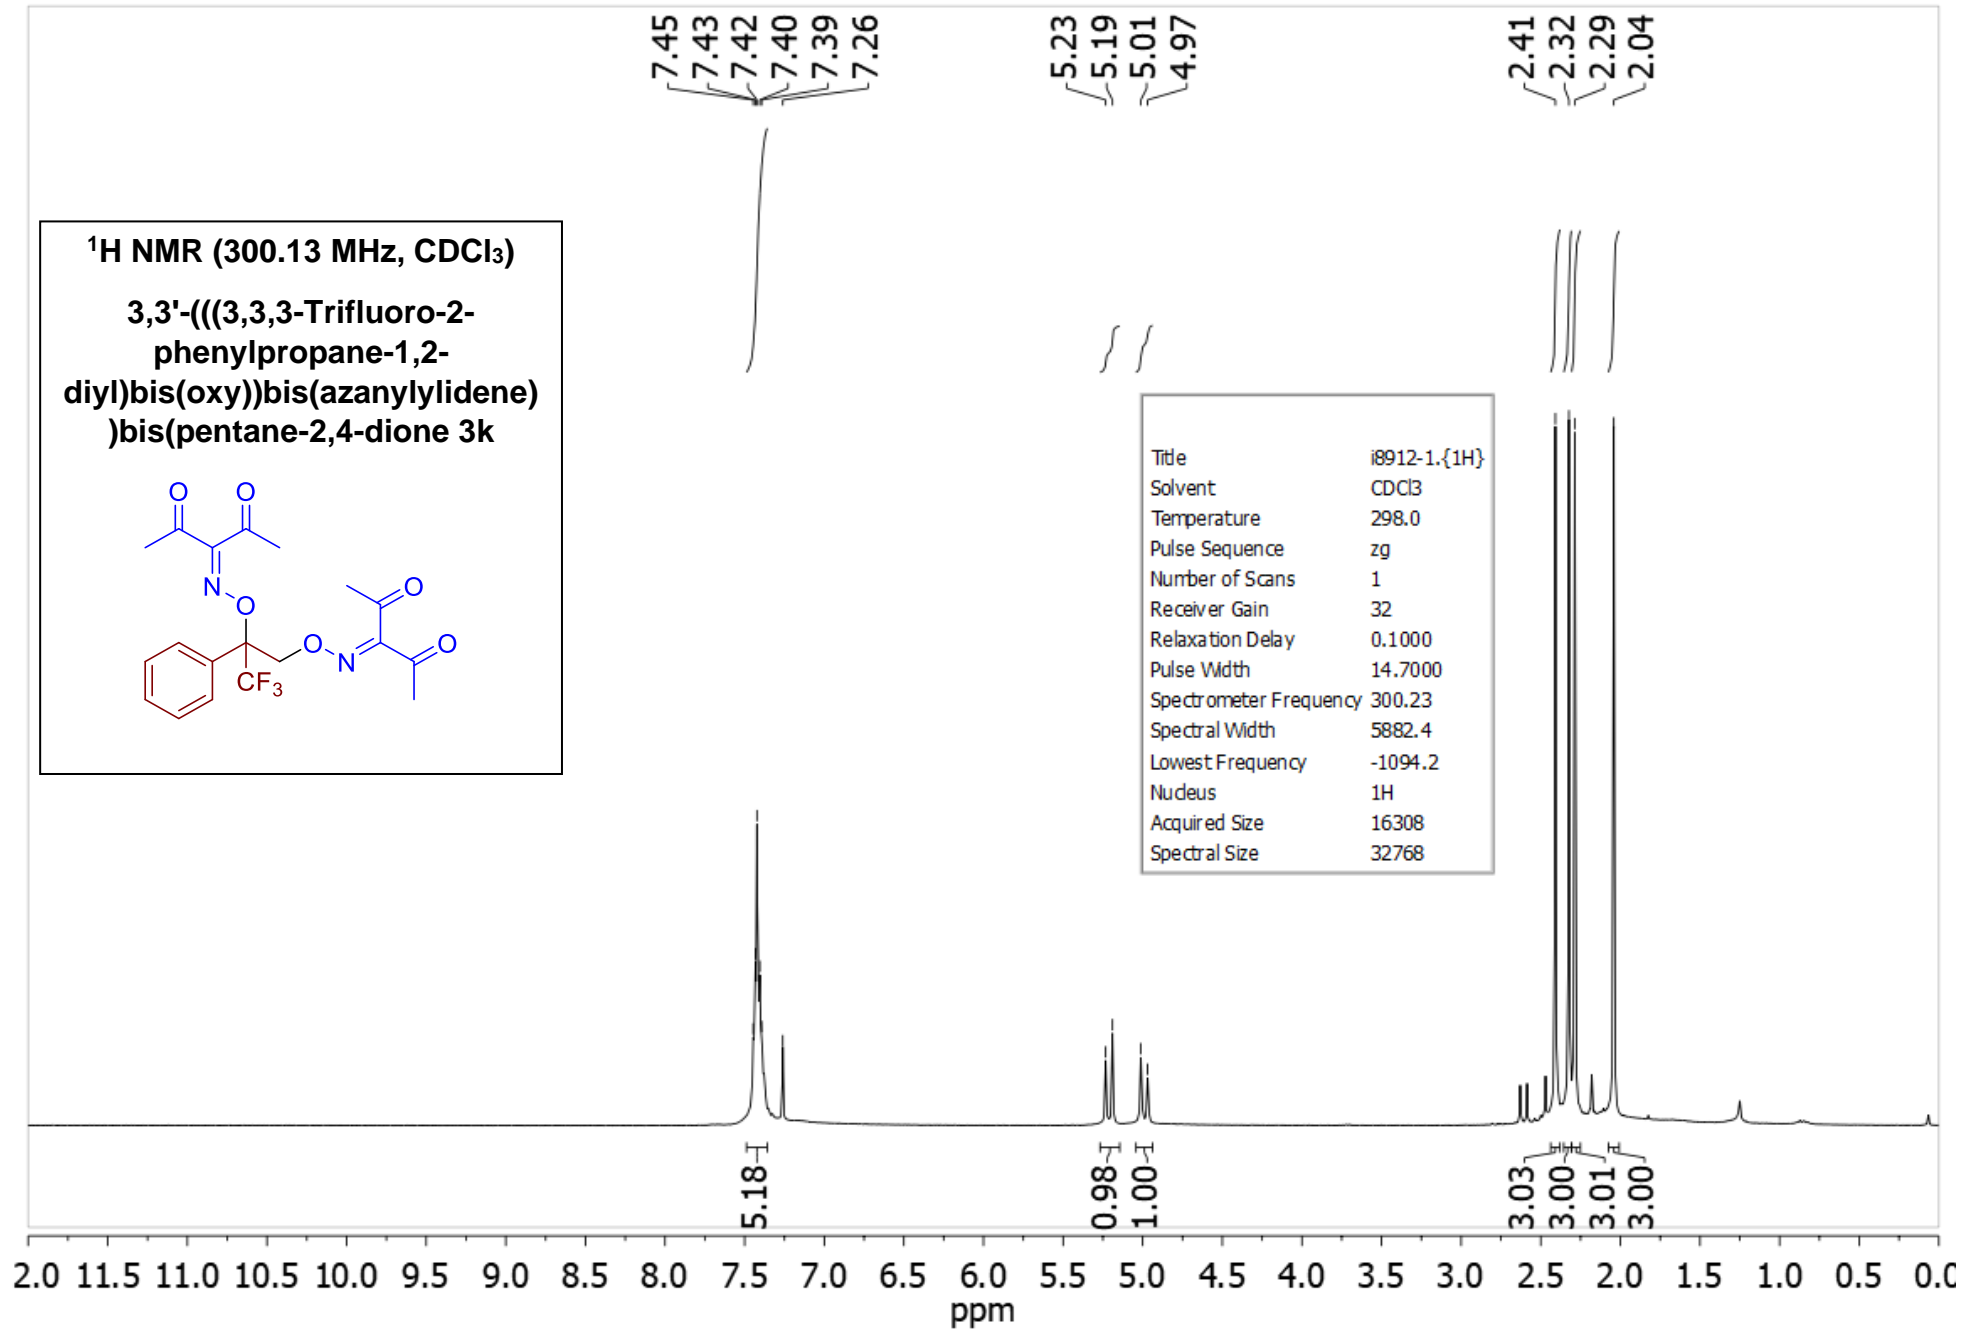

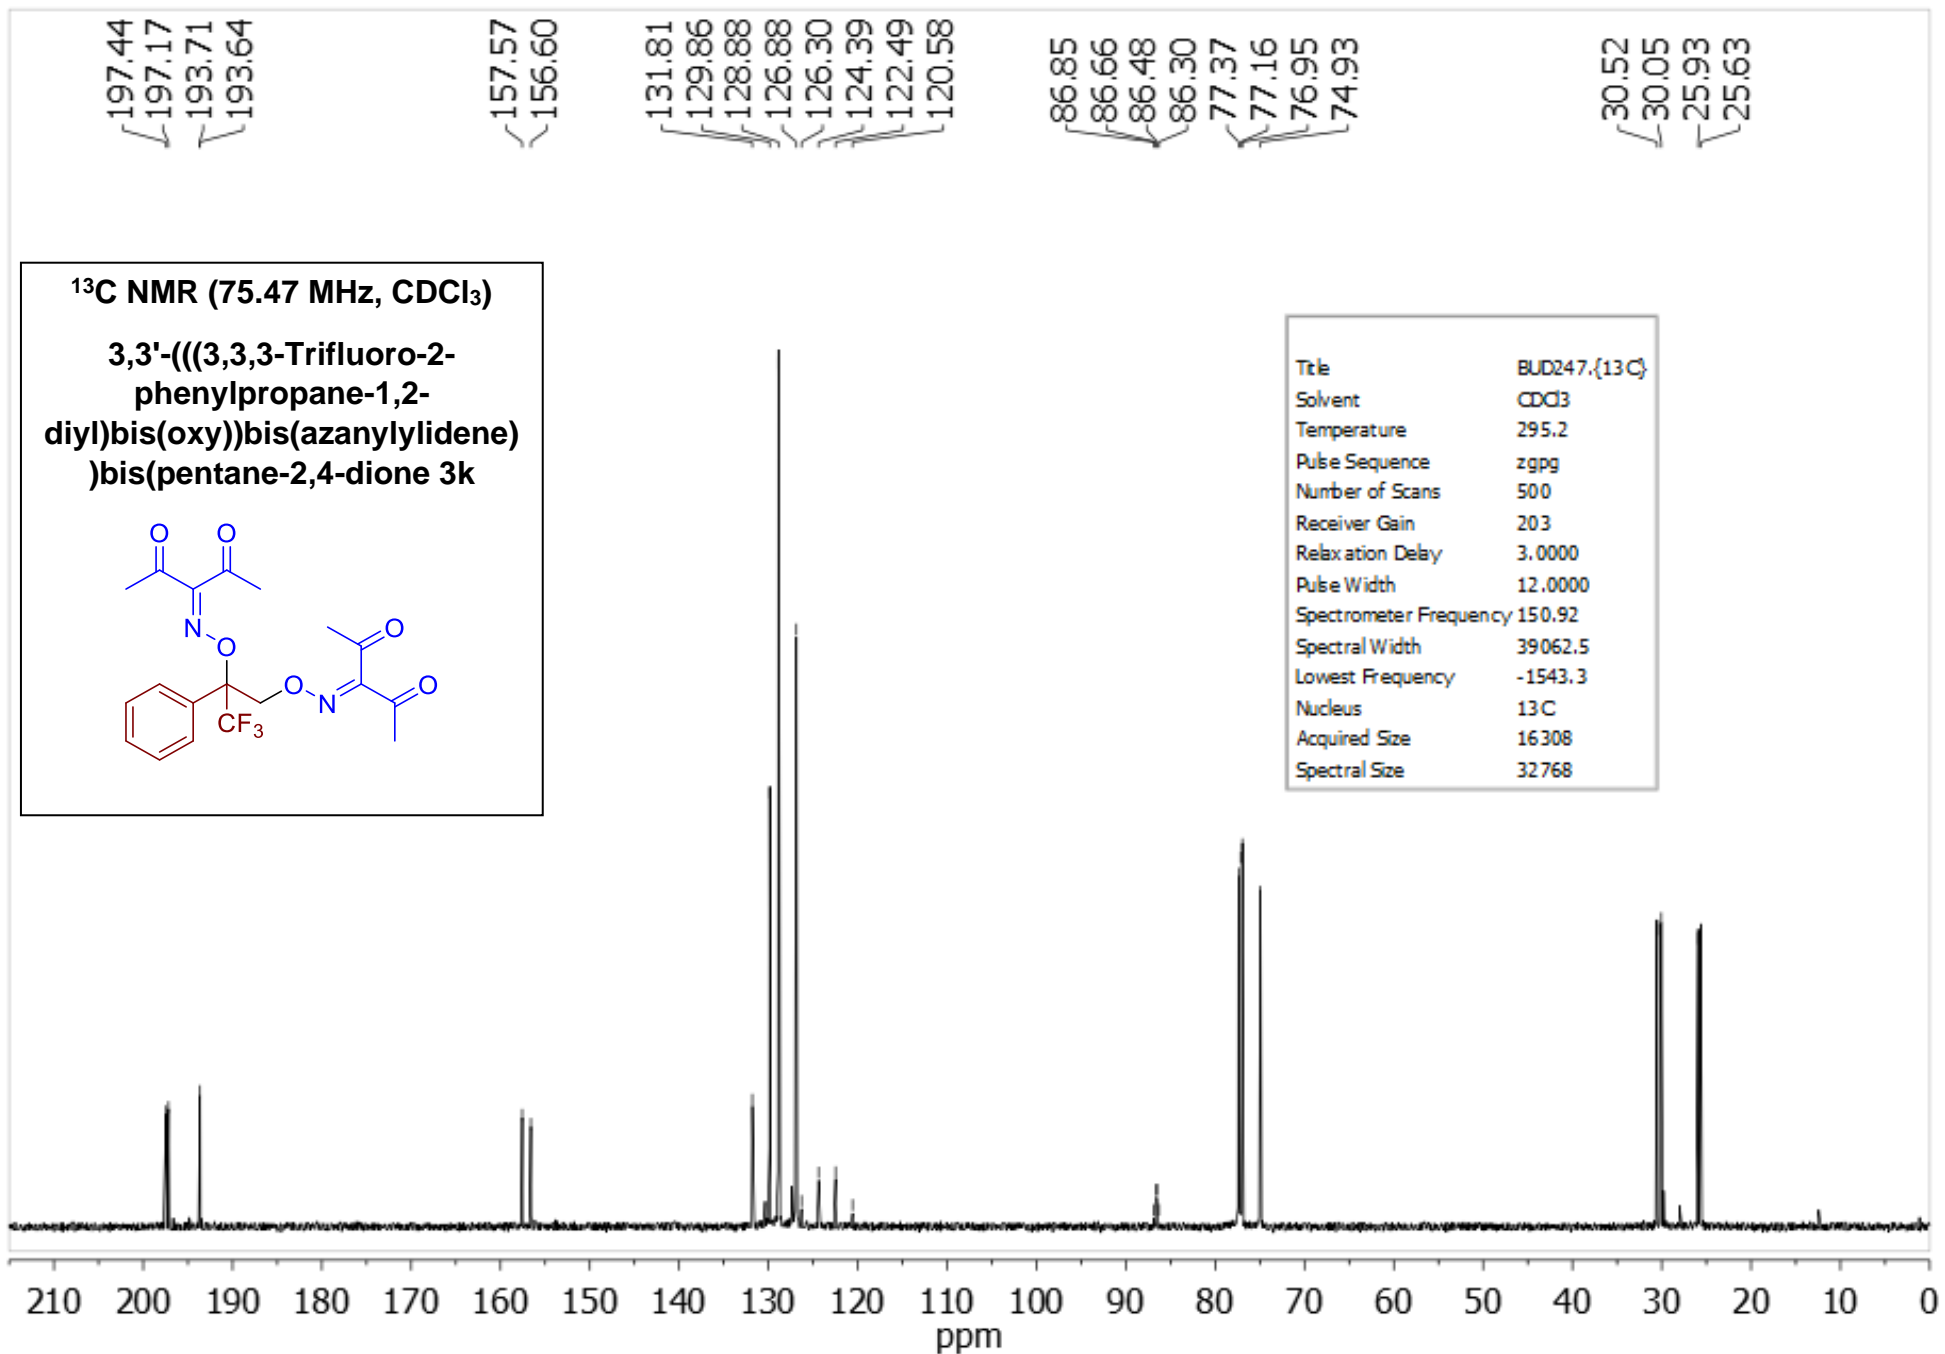

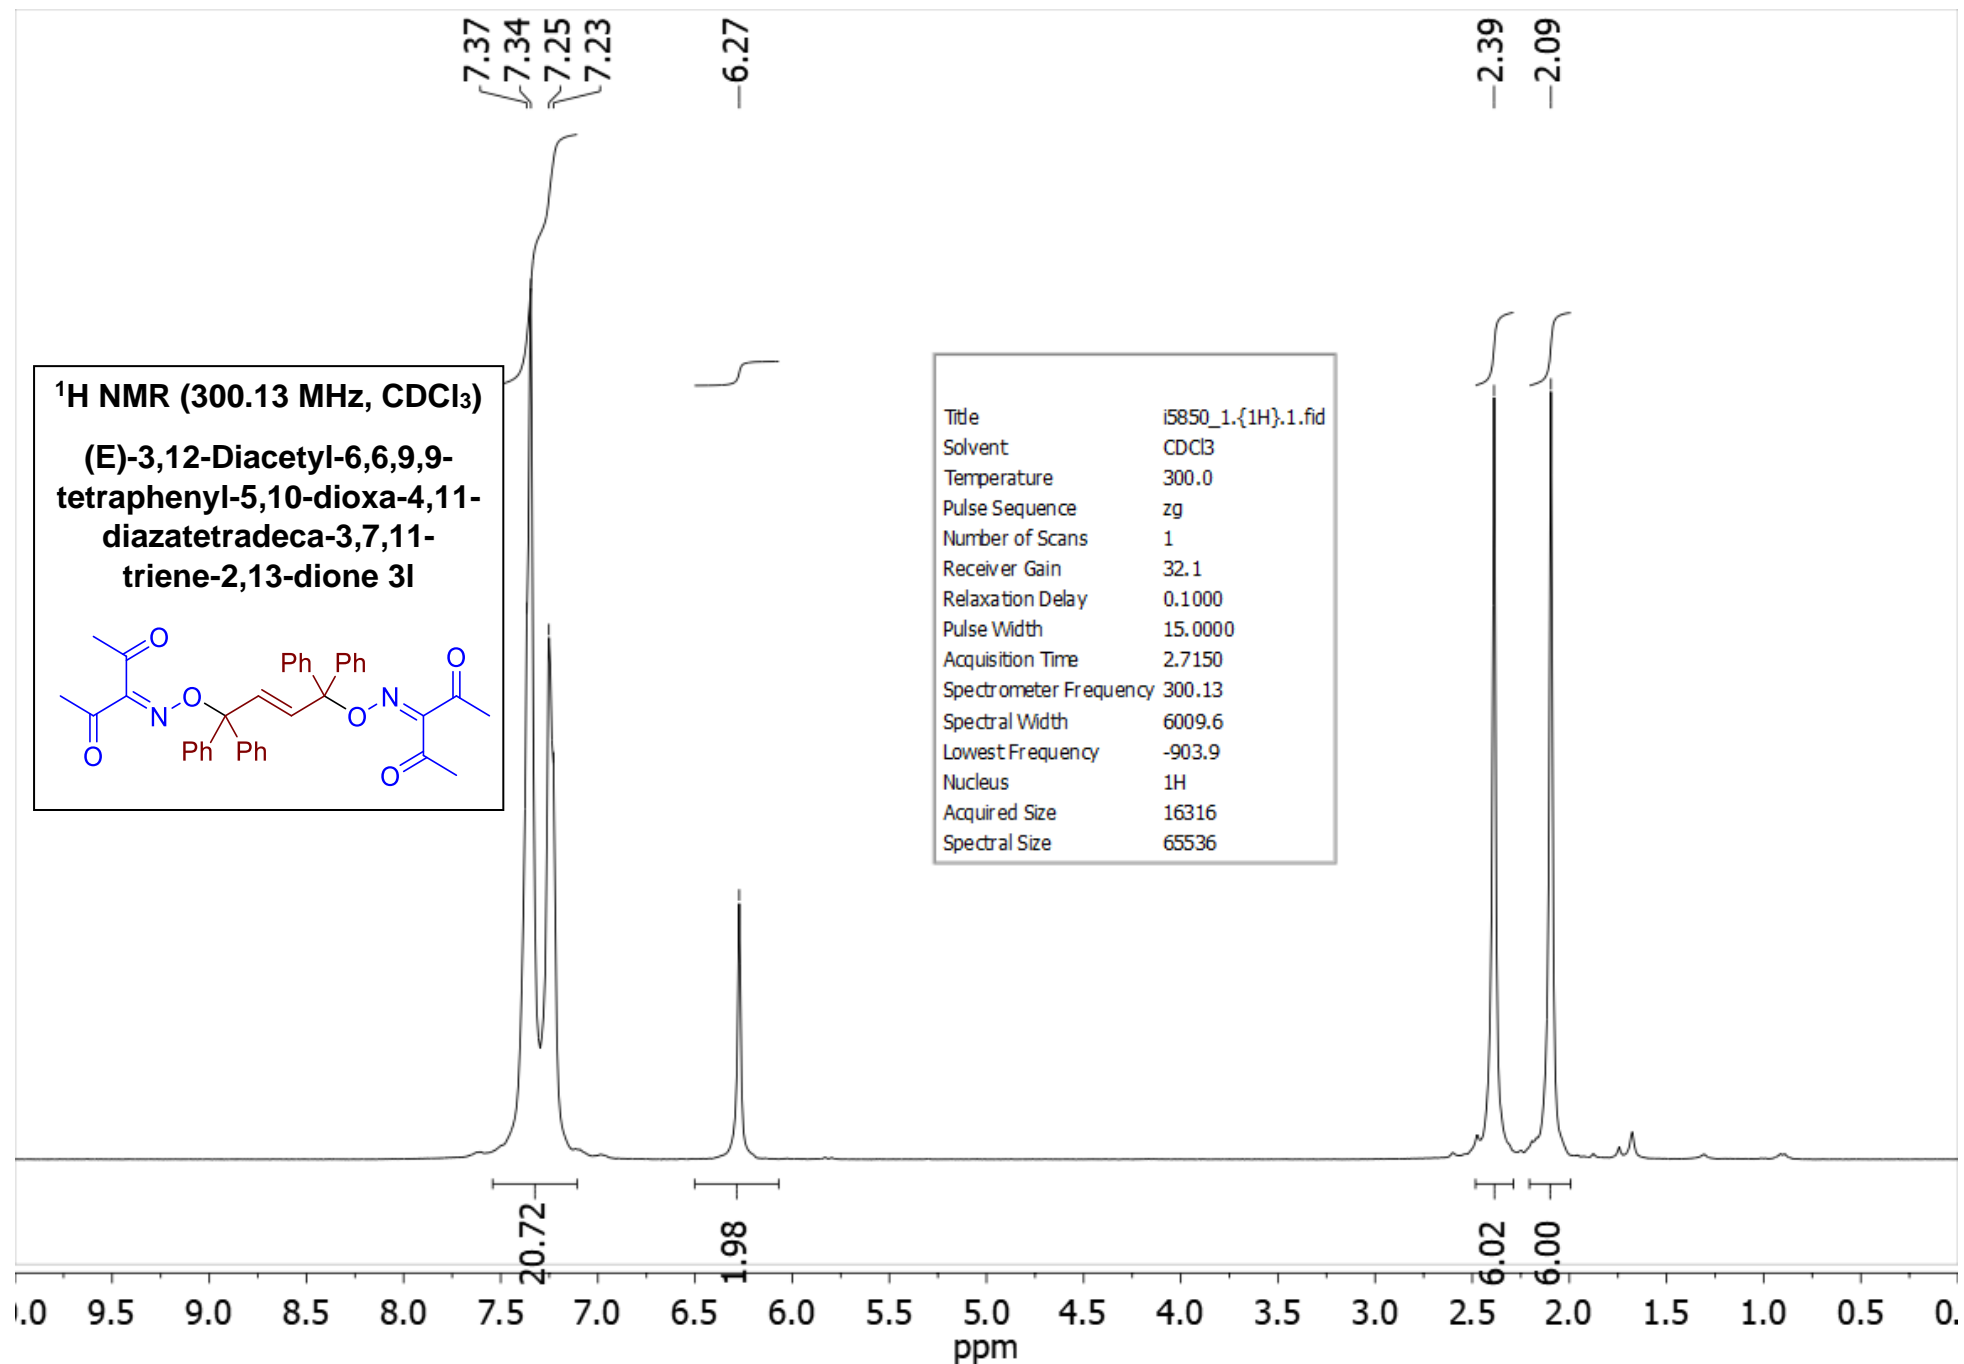

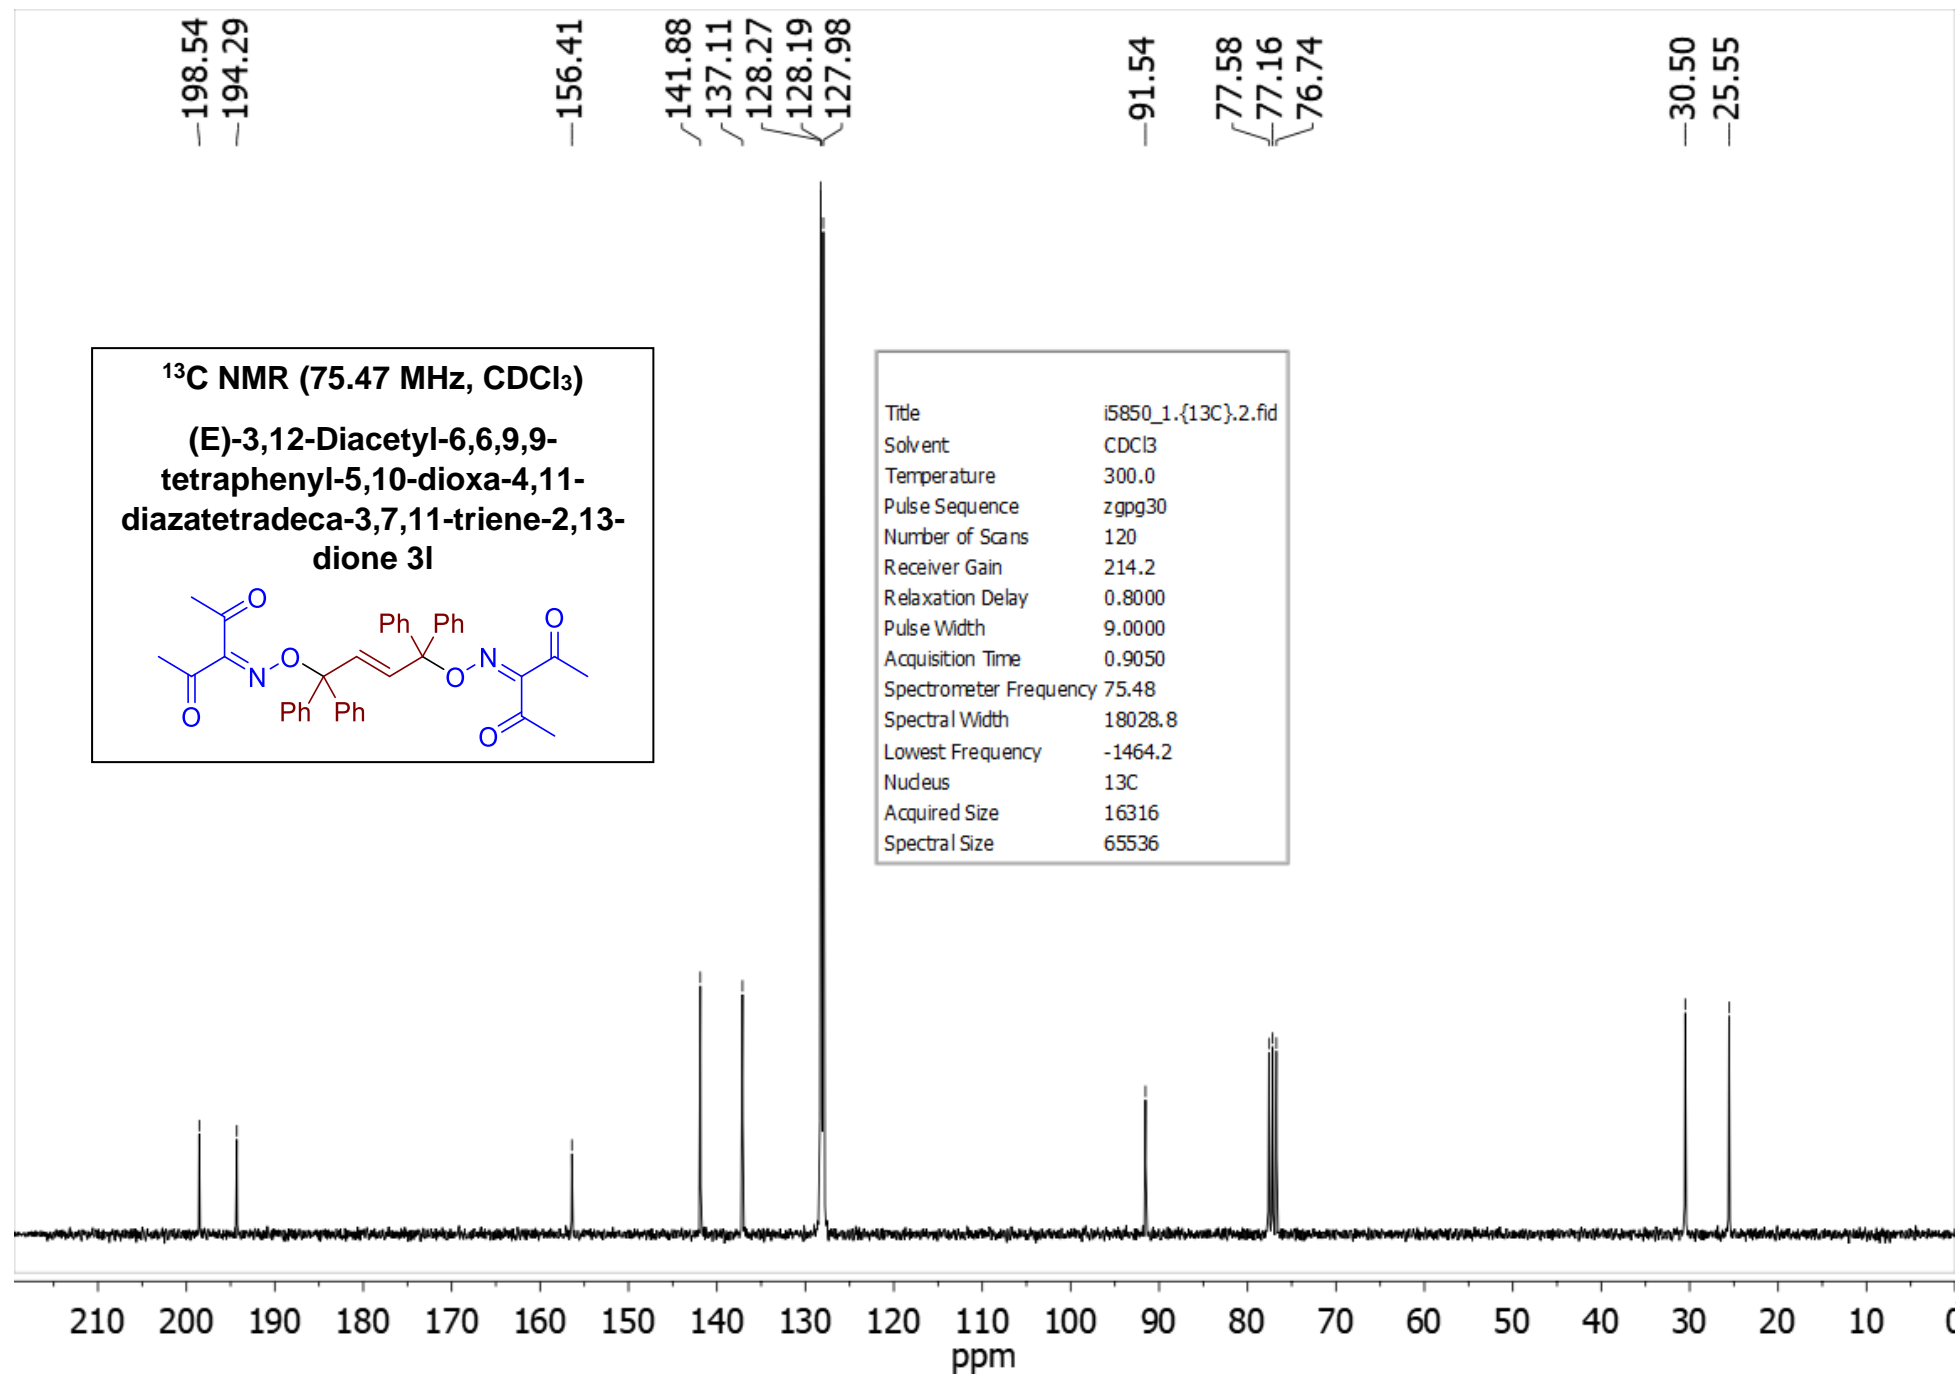

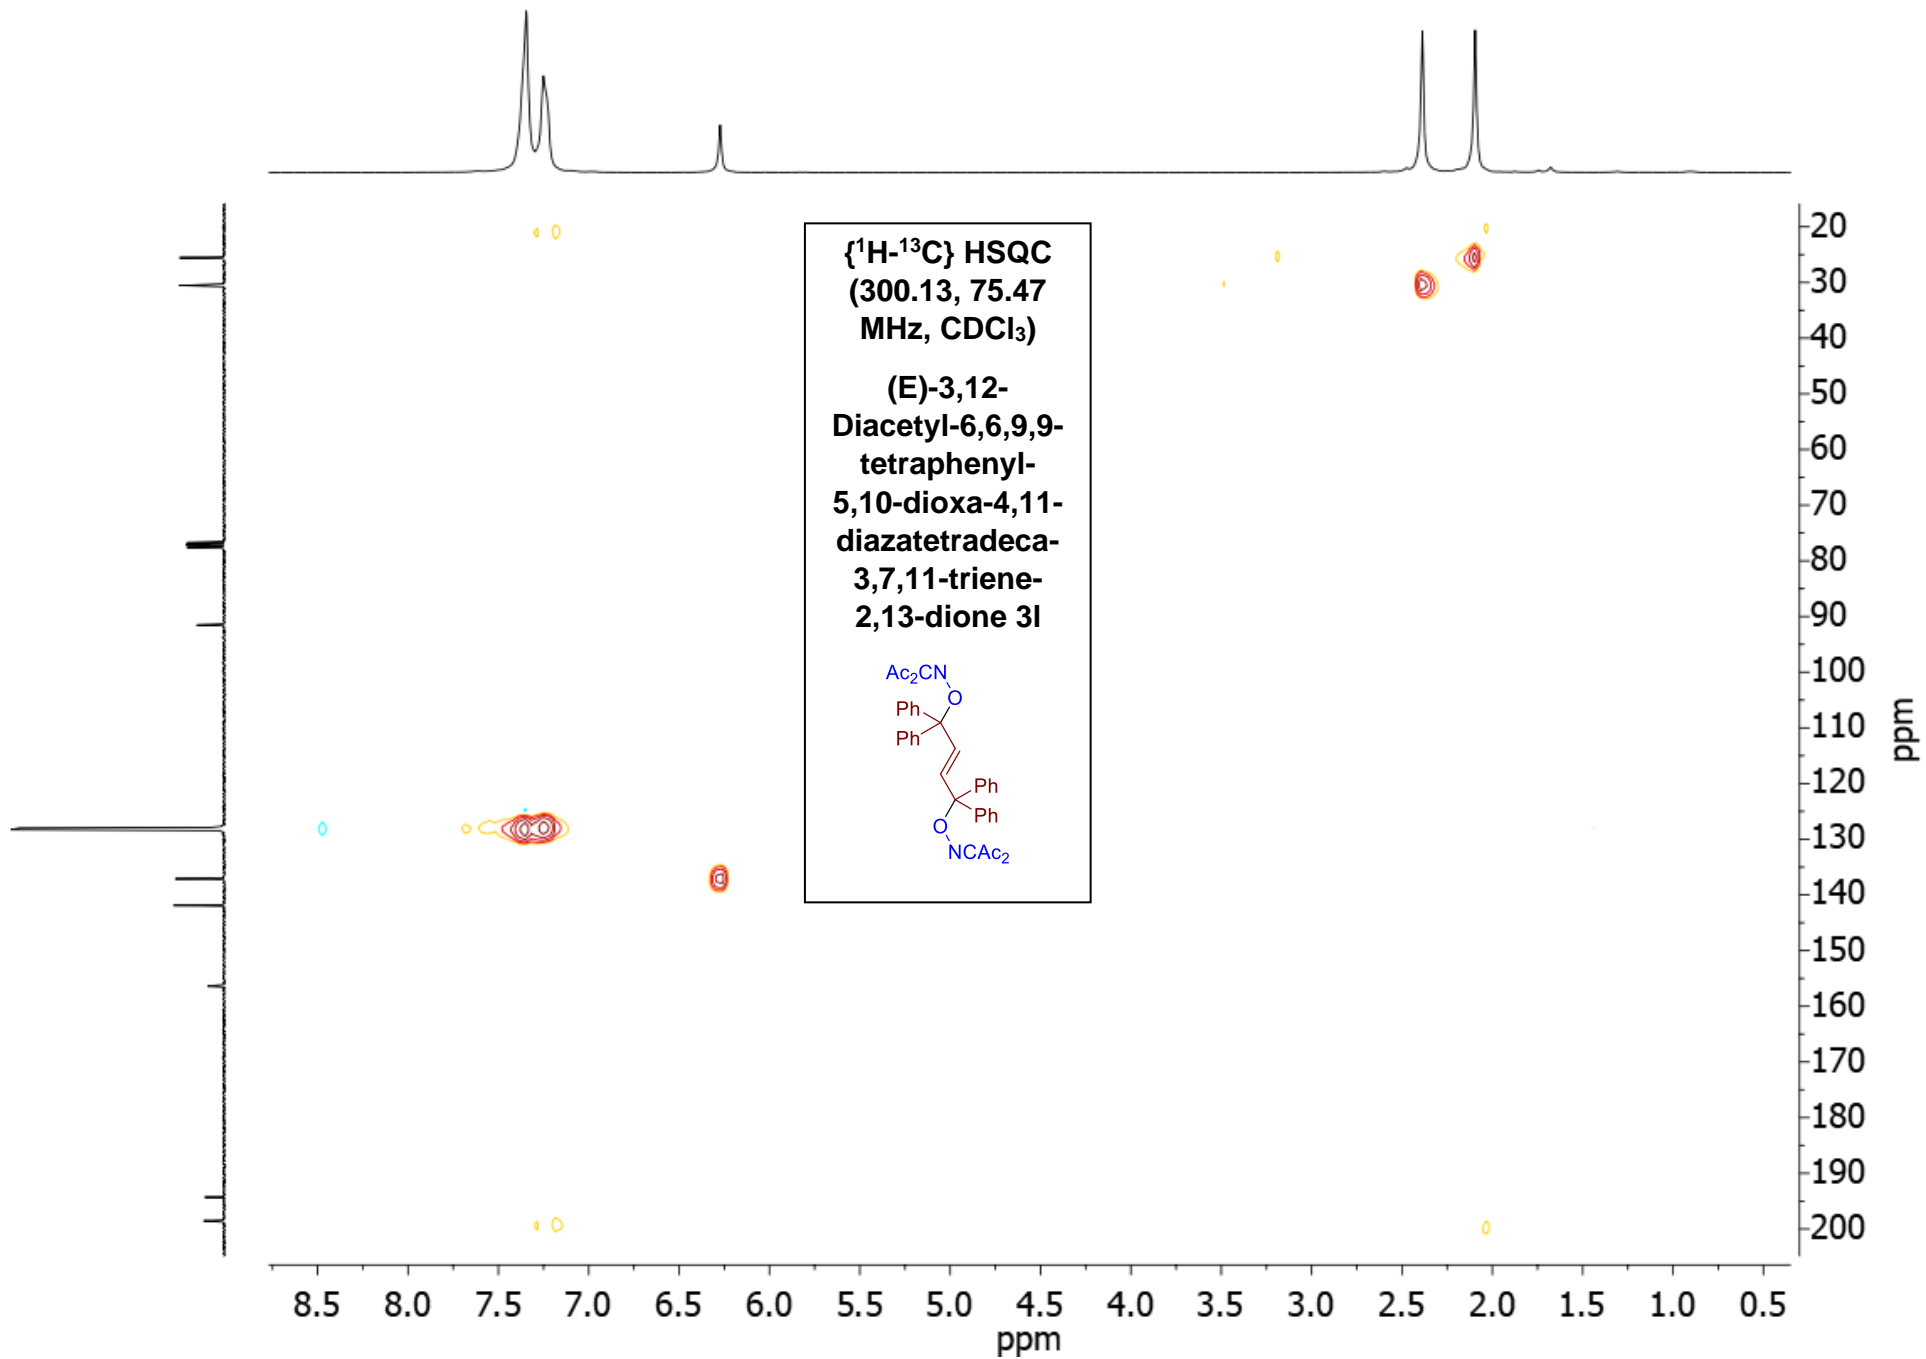

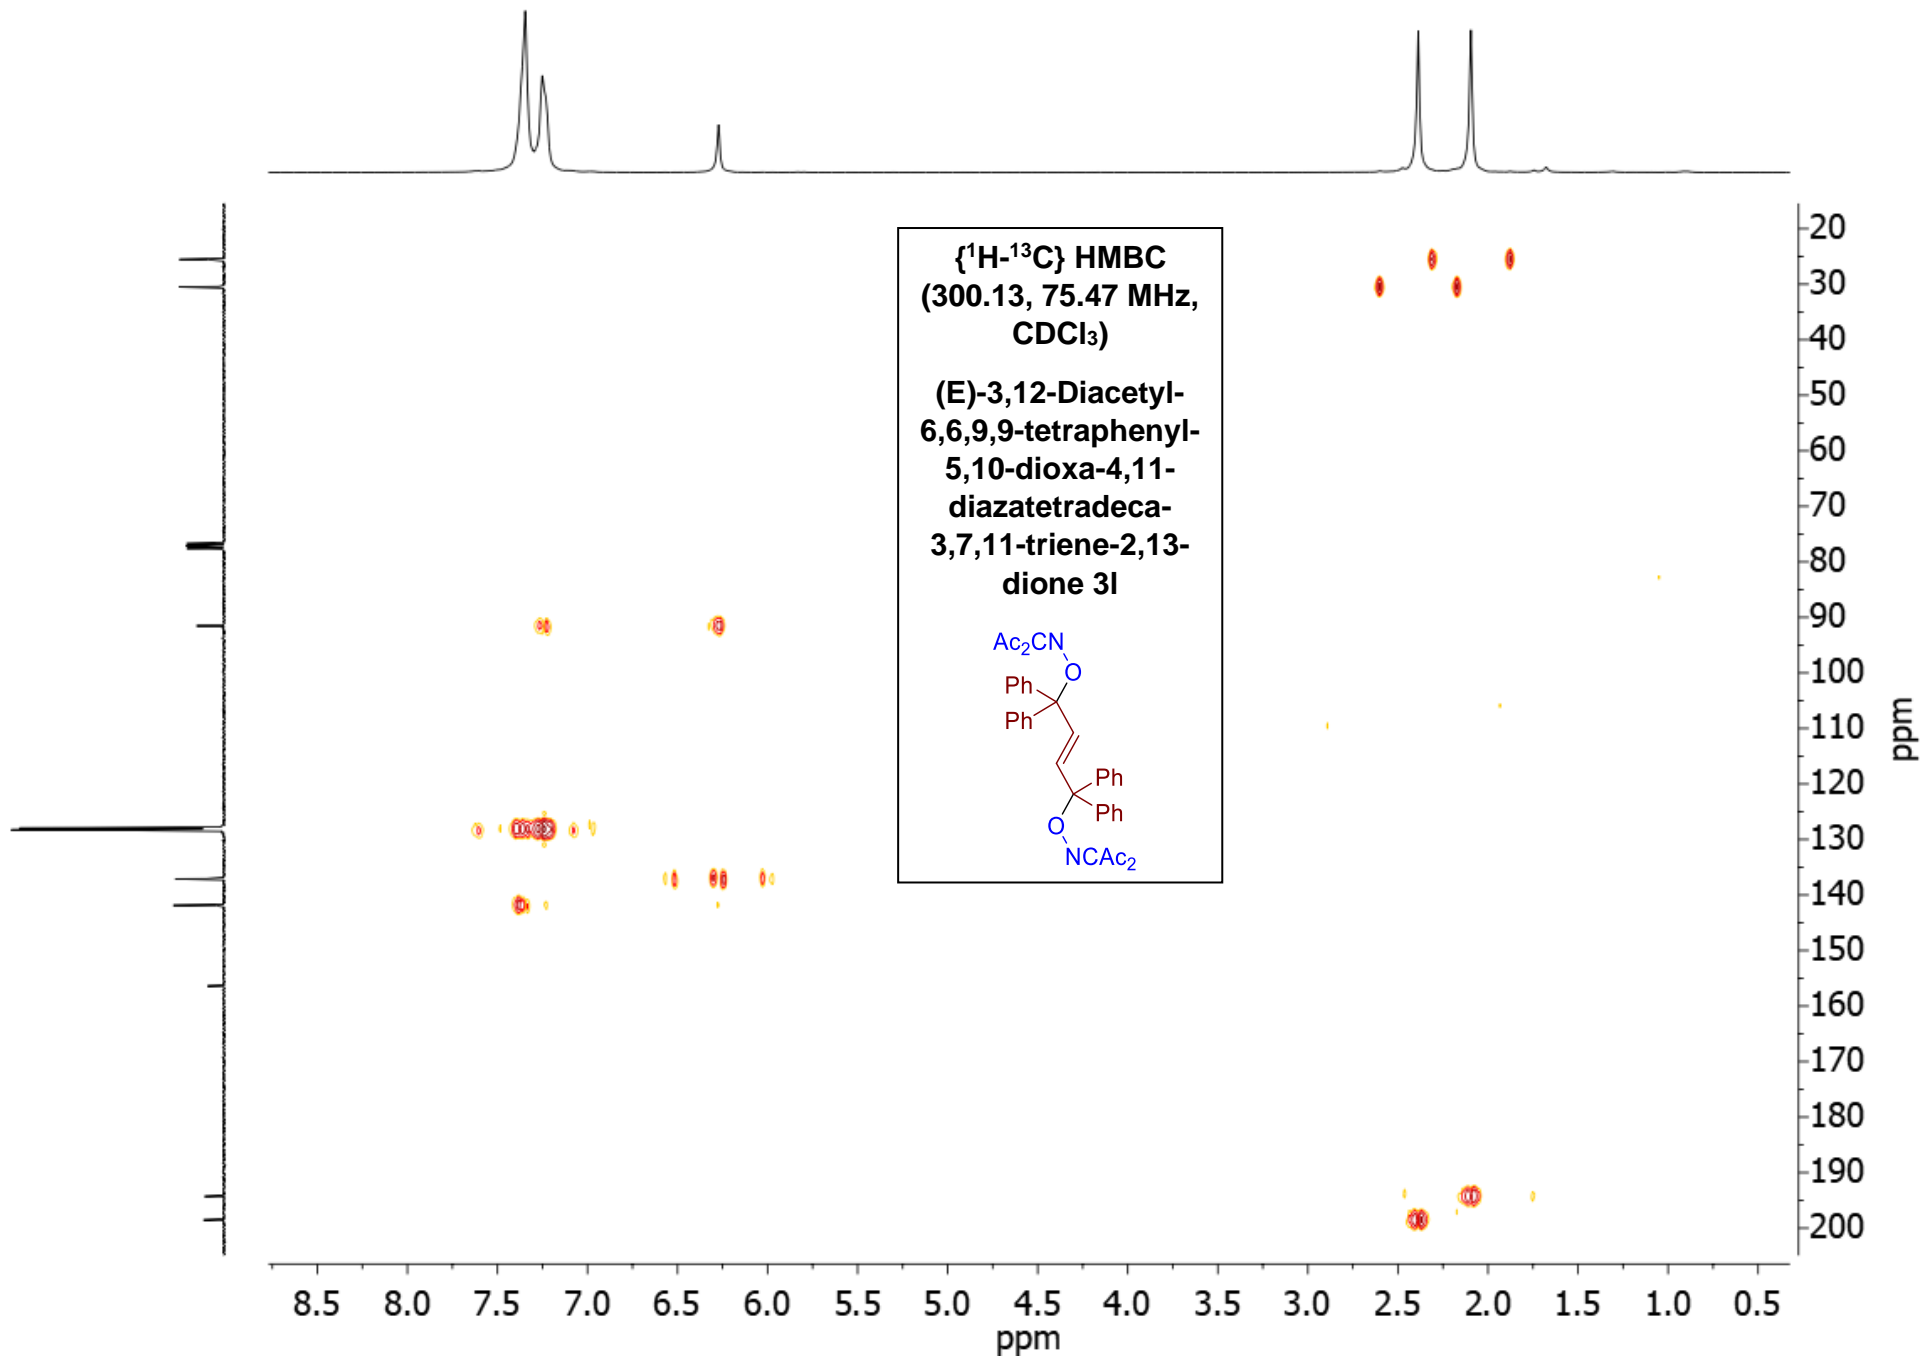

7.26  
6.19  
6.18  
6.17  
6.16  
6.16  
5.89  
5.89  
5.88  
5.87  
5.86  
5.85  
5.44  
5.44  
5.43  
5.42

2.52  
2.51  
2.50  
2.49  
2.49  
2.48  
2.37  
2.31  
2.30  
2.29  
2.28  
1.99  
1.98  
1.98  
1.97  
1.96  
1.95  
1.94  
1.93  
1.92  
1.91

<sup>1</sup>H NMR (300.13 MHz, CDCl<sub>3</sub>)

3-((Cyclopent-2-en-1-  
yloxy)imino)pentane-2,4-dione

5a

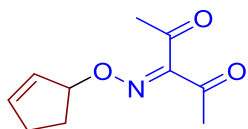

|                           |                  |
|---------------------------|------------------|
| 1 Title                   | i6656.{1H}.1.fid |
| 2 Solvent                 | CDCl3            |
| 3 Temperature             | 299.1            |
| 4 Pulse Sequence          | zg               |
| 5 Number of Scans         | 1                |
| 6 Receiver Gain           | 181.0            |
| 7 Relaxation Delay        | 0.0050           |
| 8 Pulse Width             | 9.0000           |
| 9 Acquisition Time        | 1.3518           |
| 10 Spectrometer Frequency | 300.13           |
| 11 Spectral Width         | 6009.6           |
| 12 Lowest Frequency       | -609.7           |
| 13 Nucleus                | 1H               |
| 14 Acquired Size          | 8124             |
| 15 Spectral Size          | 65536            |

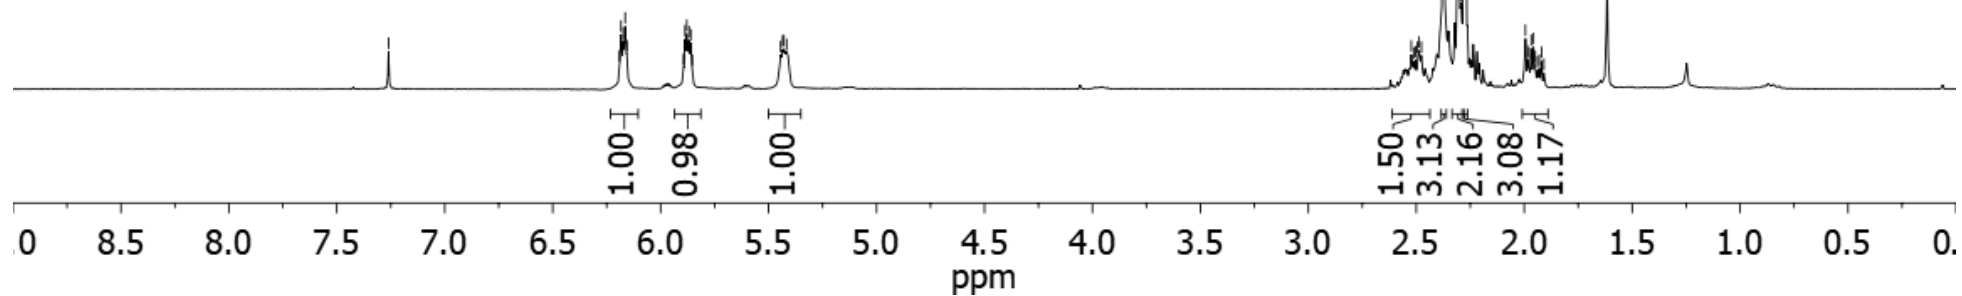



—198.90  
—194.66

—155.89

—139.27

—128.95

—92.07

77.58  
77.16  
76.74

31.43  
30.68  
29.32  
25.64

**<sup>13</sup>C NMR (75.47 MHz, CDCl<sub>3</sub>)**

**3-((Cyclopent-2-en-1-  
yloxy)imino)pentane-2,4-dione  
5a**

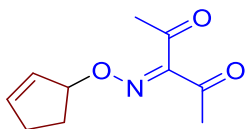

|    |                        |                   |
|----|------------------------|-------------------|
| 1  | Title                  | i6656-13C-13.fid  |
| 2  | Solvent                | CDCl <sub>3</sub> |
| 3  | Temperature            | 299.6             |
| 4  | Pulse Sequence         | zgpg30            |
| 5  | Number of Scans        | 136               |
| 6  | Receiver Gain          | 3250.0            |
| 7  | Relaxation Delay       | 1.0000            |
| 8  | Pulse Width            | 13.0000           |
| 9  | Acquisition Time       | 0.9002            |
| 10 | Spectrometer Frequency | 75.48             |
| 11 | Spectral Width         | 18115.9           |
| 12 | Lowest Frequency       | -746.0            |
| 13 | Nucleus                | 13C               |
| 14 | Acquired Size          | 16308             |
| 15 | Spectral Size          | 65536             |

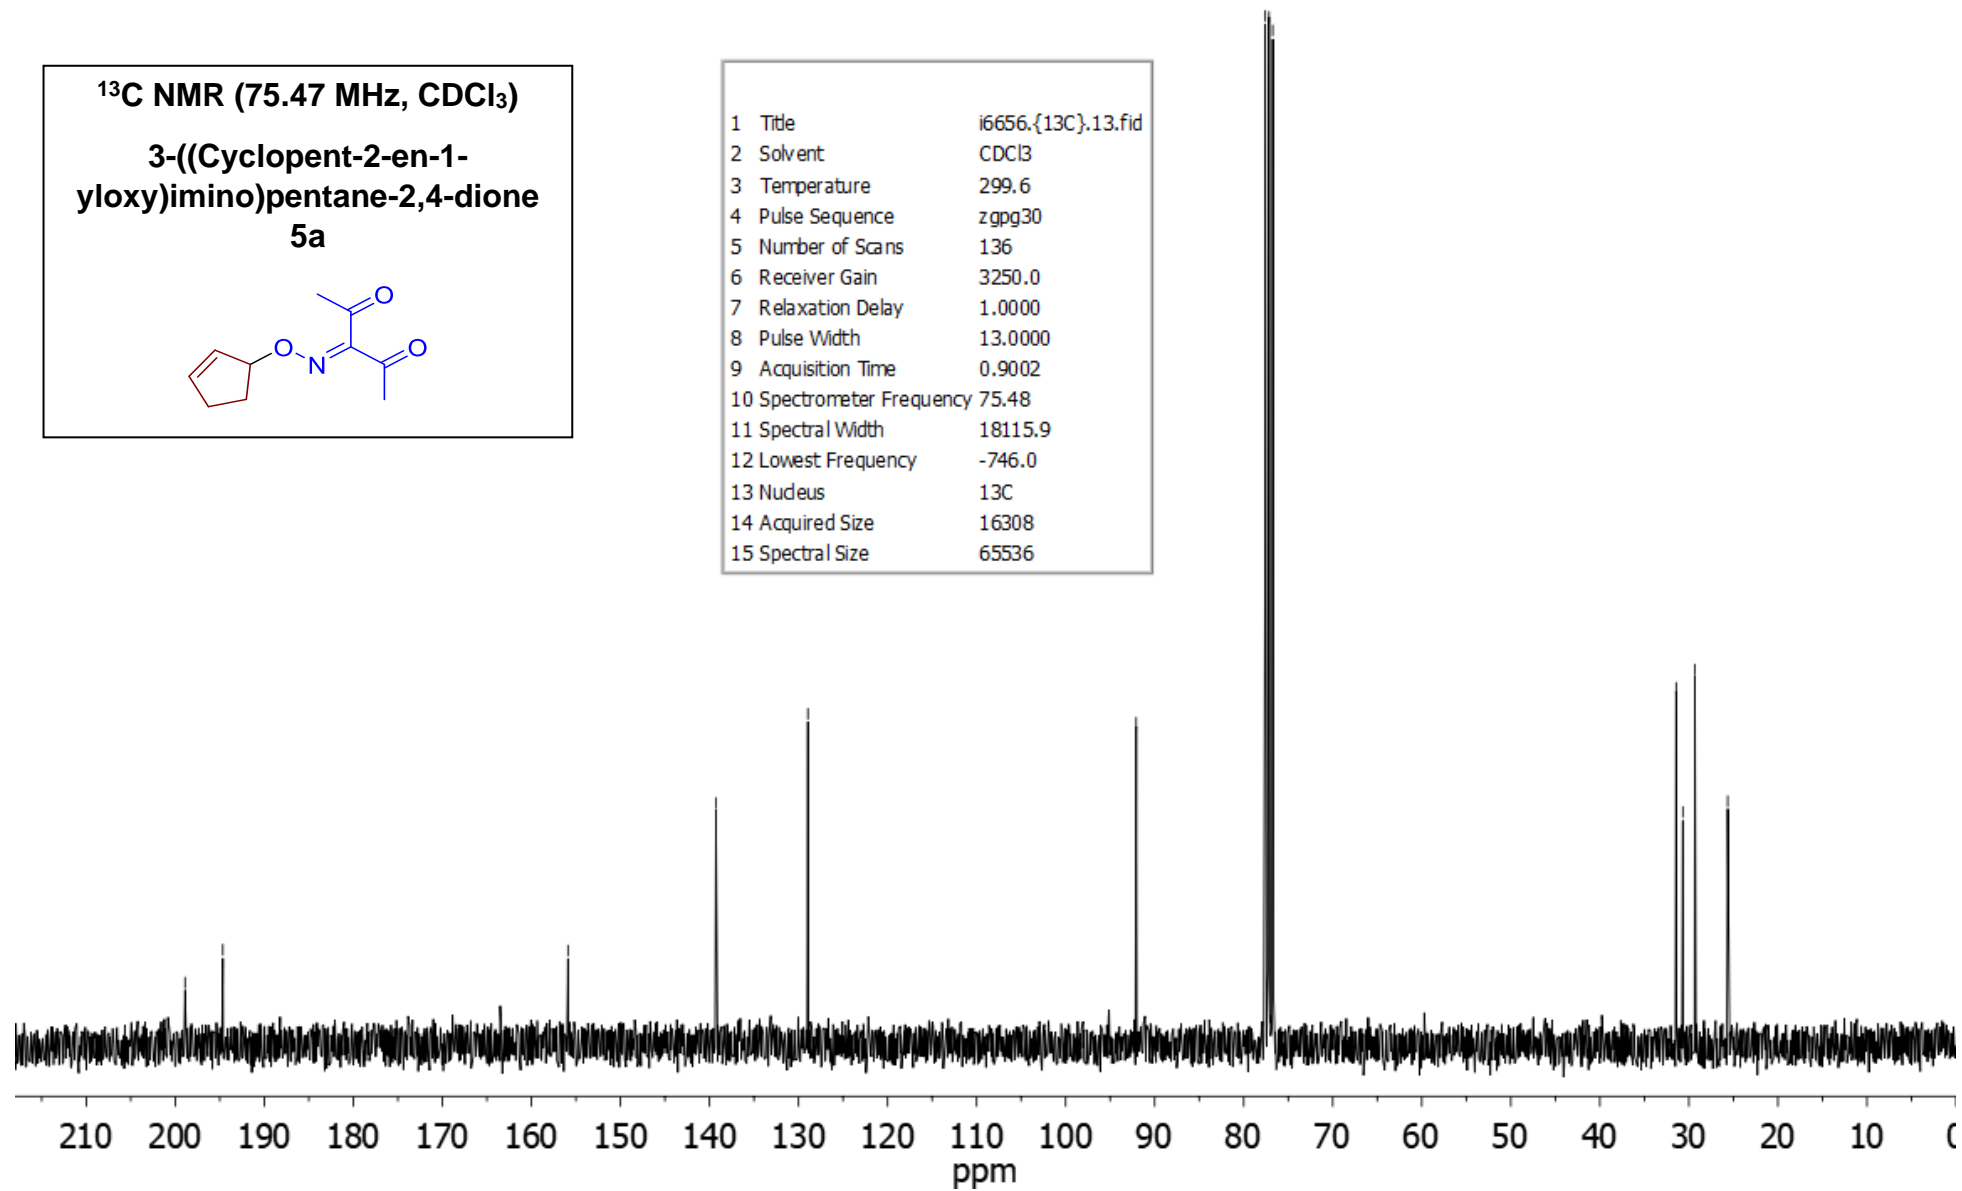

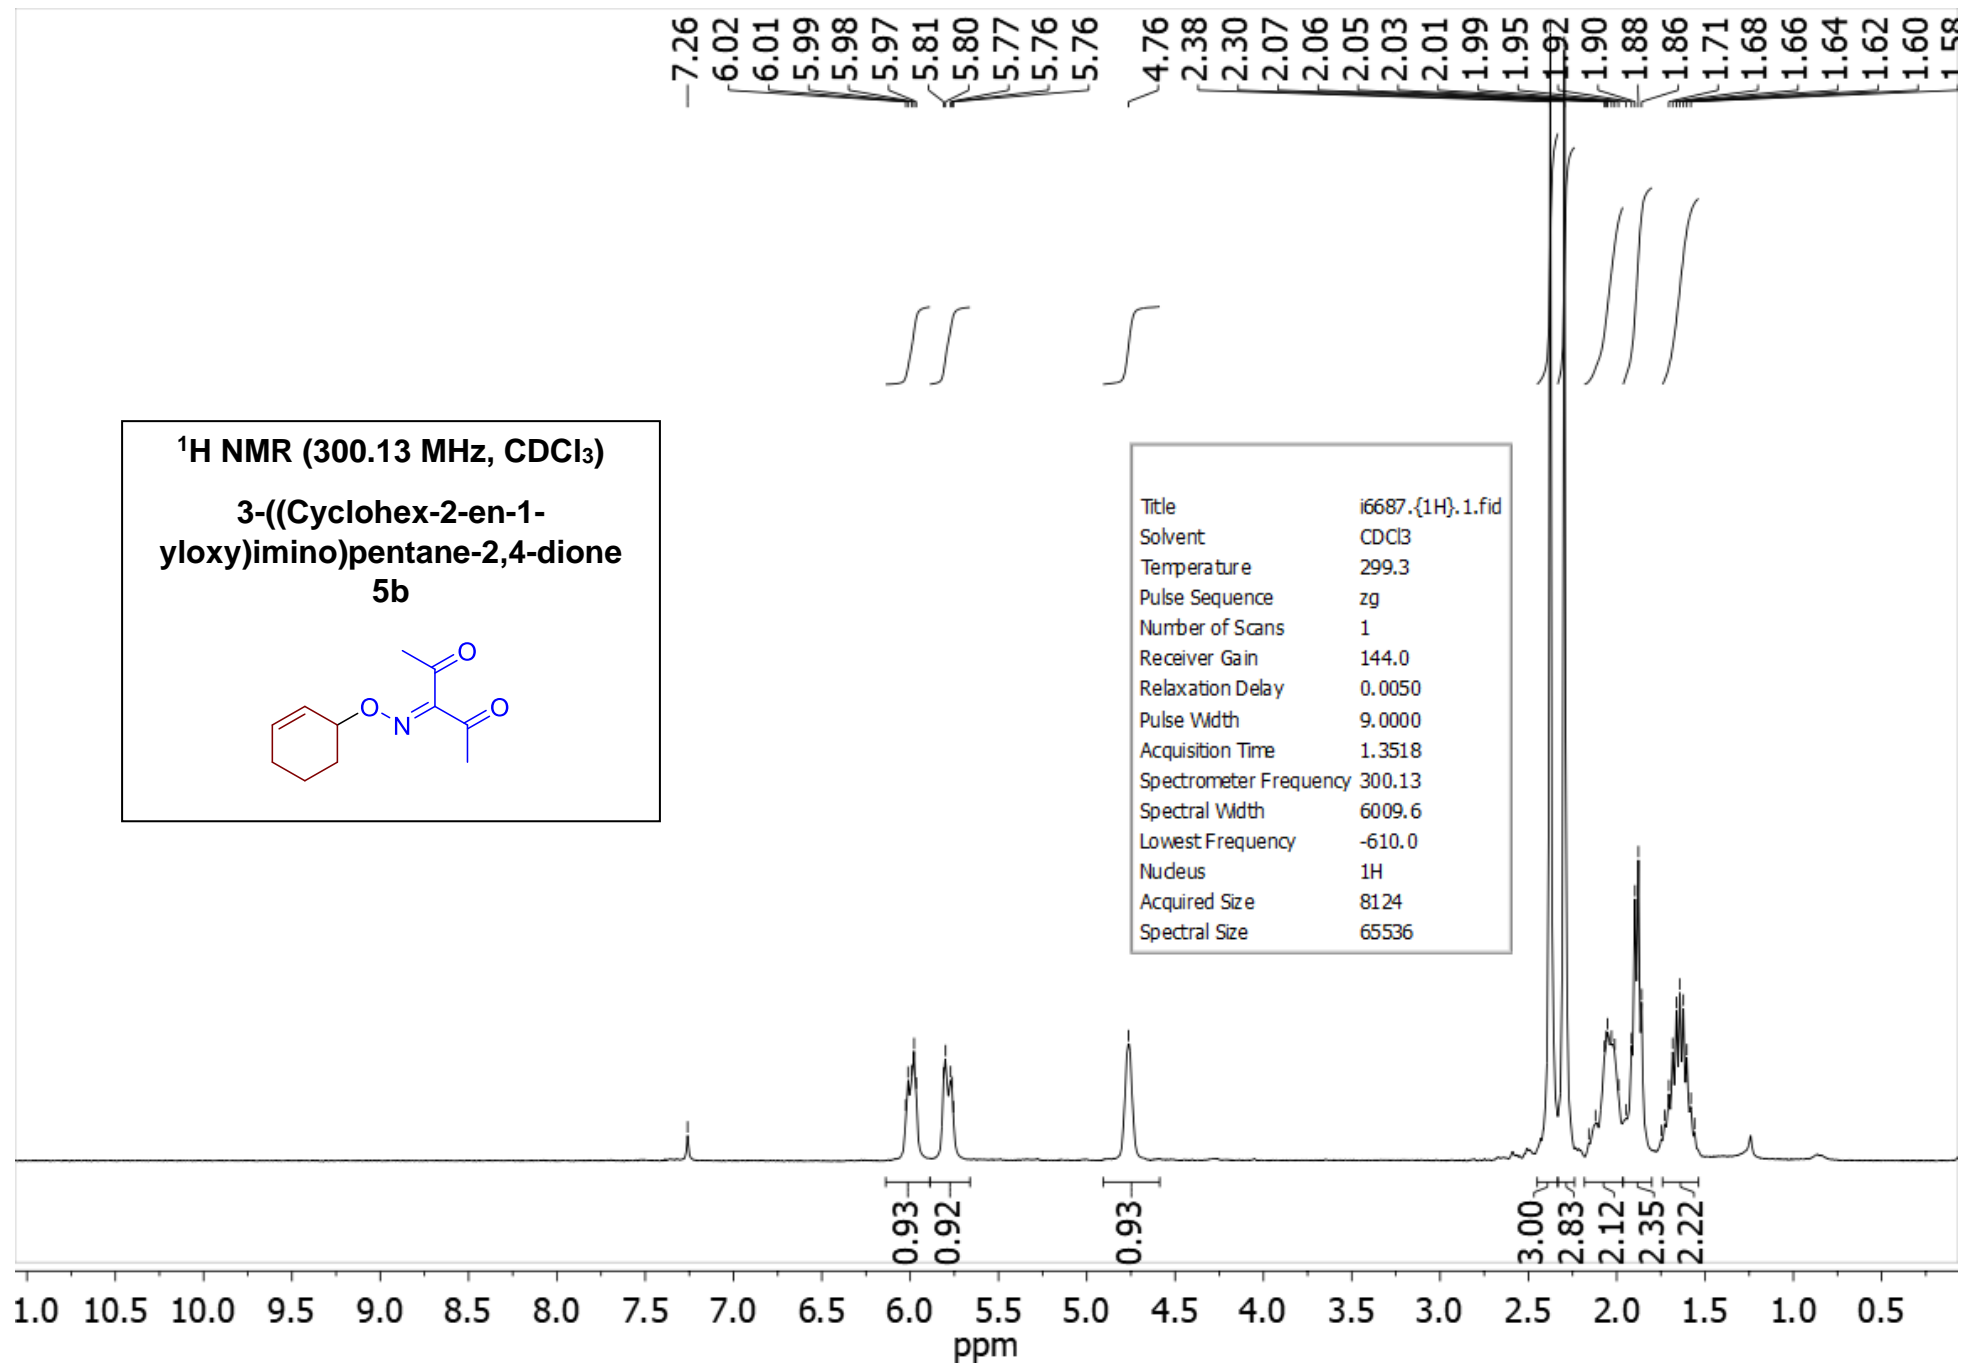

198.82  
194.60

155.92

133.94  
124.90

79.72  
77.58  
77.16  
76.74

30.68  
28.14  
25.66  
25.12  
18.56

**<sup>13</sup>C NMR (75.47 MHz, CDCl<sub>3</sub>)**  
**3-((Cyclohex-2-en-1-  
yloxy)imino)pentane-2,4-dione 5b**

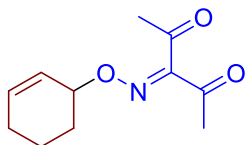

|                        |                    |
|------------------------|--------------------|
| Title                  | i6687.{13C}.13.fid |
| Solvent                | CDCl3              |
| Temperature            | 298.9              |
| Pulse Sequence         | zgpg30             |
| Number of Scans        | 168                |
| Receiver Gain          | 3250.0             |
| Relaxation Delay       | 1.0000             |
| Pulse Width            | 13.0000            |
| Acquisition Time       | 0.9002             |
| Spectrometer Frequency | 75.48              |
| Spectral Width         | 18115.9            |
| Lowest Frequency       | -747.0             |
| Nucleus                | 13C                |
| Acquired Size          | 16308              |
| Spectral Size          | 65536              |

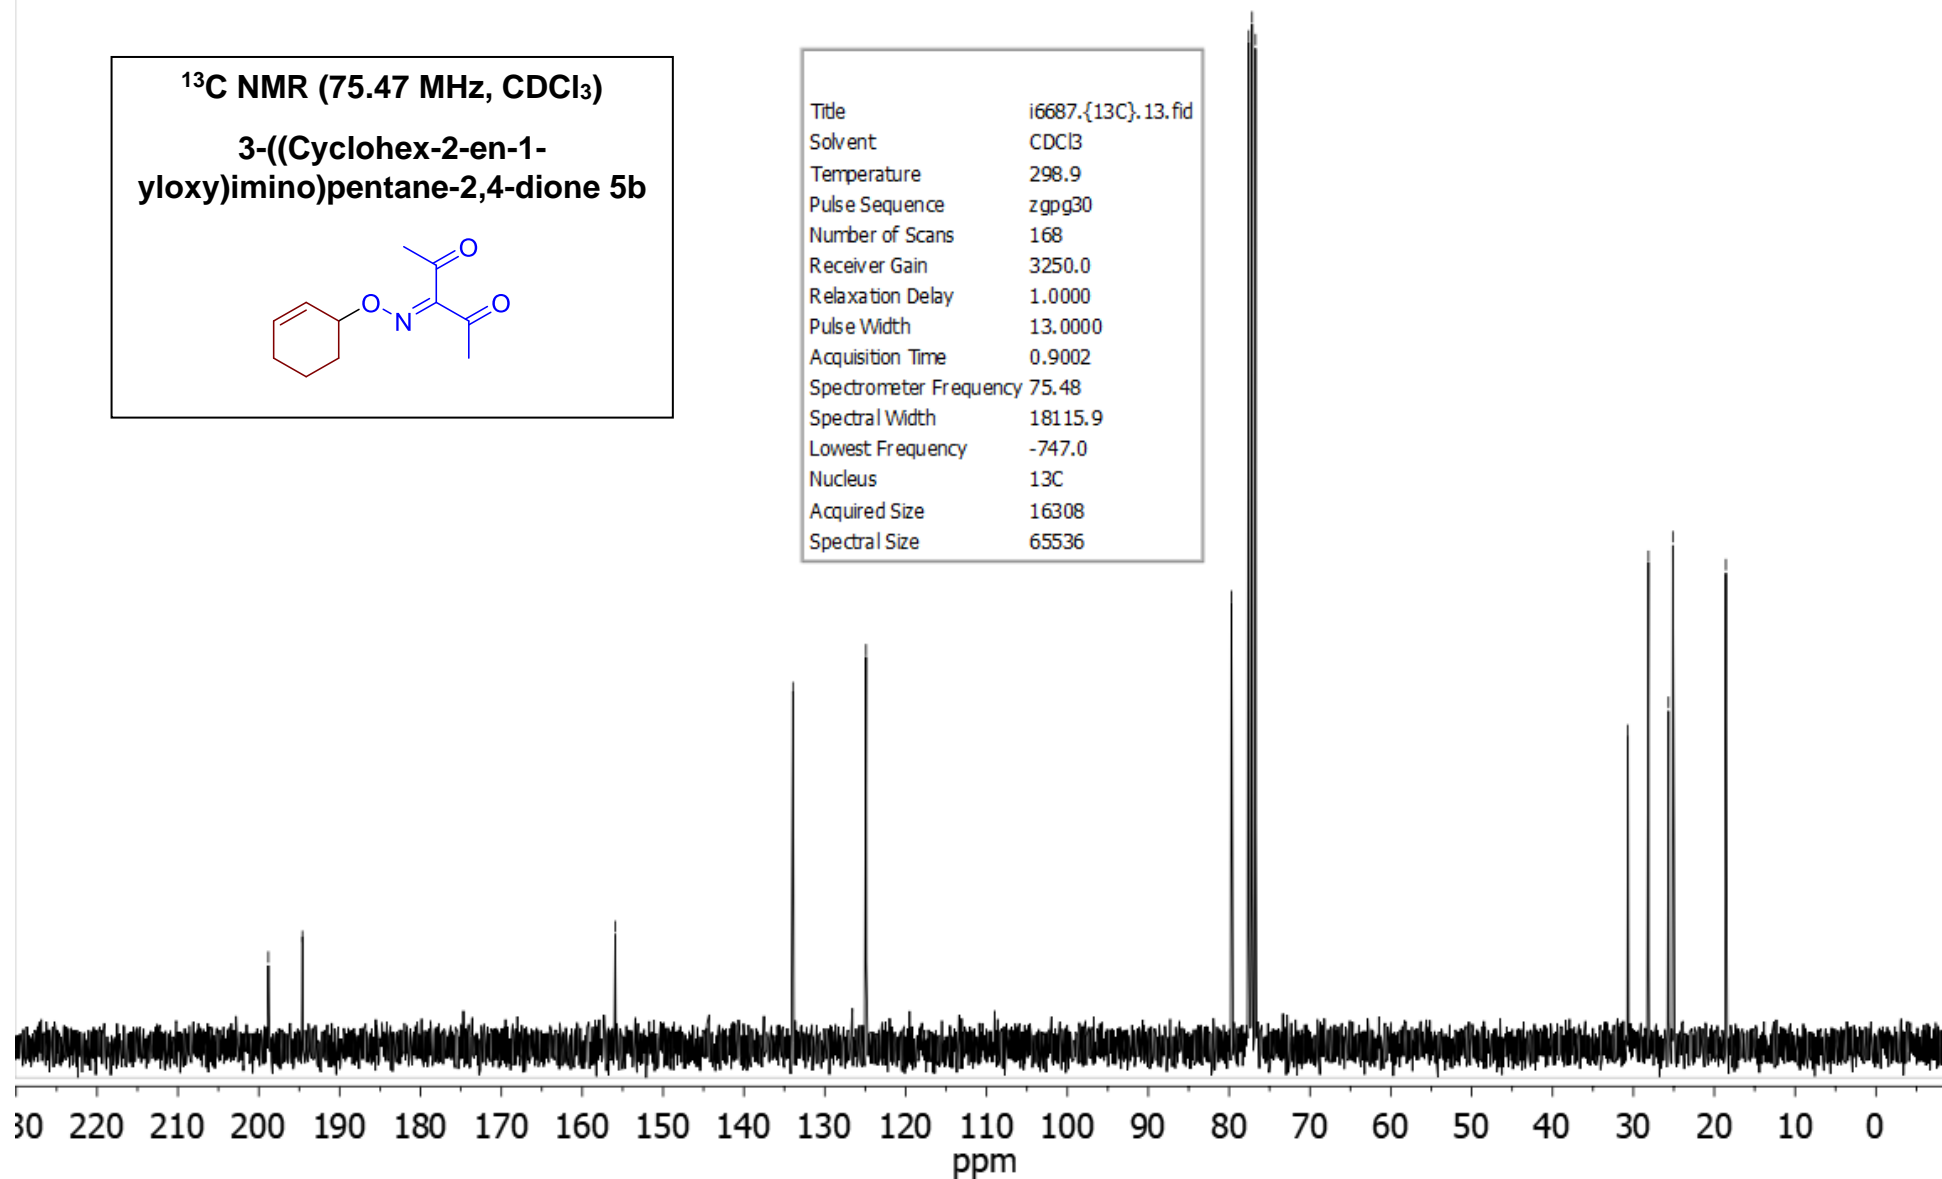

7.38  
7.36  
7.33  
7.32  
7.30  
7.26  
6.15  
6.13  
6.12  
6.10  
6.08  
6.06  
6.04  
5.73  
5.71  
5.35  
5.33  
5.32  
5.28

2.34  
2.33

**<sup>1</sup>H NMR (300.13 MHz, CDCl<sub>3</sub>)**

**3-(((1-Phenylallyl)oxy)imino)pentane-2,4-dione 5c**

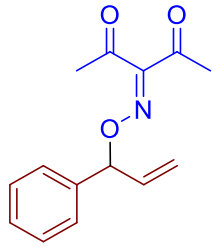

|                        |             |
|------------------------|-------------|
| Title                  | BUD547.{1H} |
| Solvent                | CDCl3       |
| Temperature            | 298.0       |
| Pulse Sequence         | zg          |
| Number of Scans        | 1           |
| Receiver Gain          | 32          |
| Relaxation Delay       | 0.1000      |
| Pulse Width            | 14.7000     |
| Spectrometer Frequency | 300.23      |
| Spectral Width         | 5882.4      |
| Lowest Frequency       | -1094.5     |
| Nucleus                | 1H          |
| Acquired Size          | 16308       |
| Spectral Size          | 32768       |

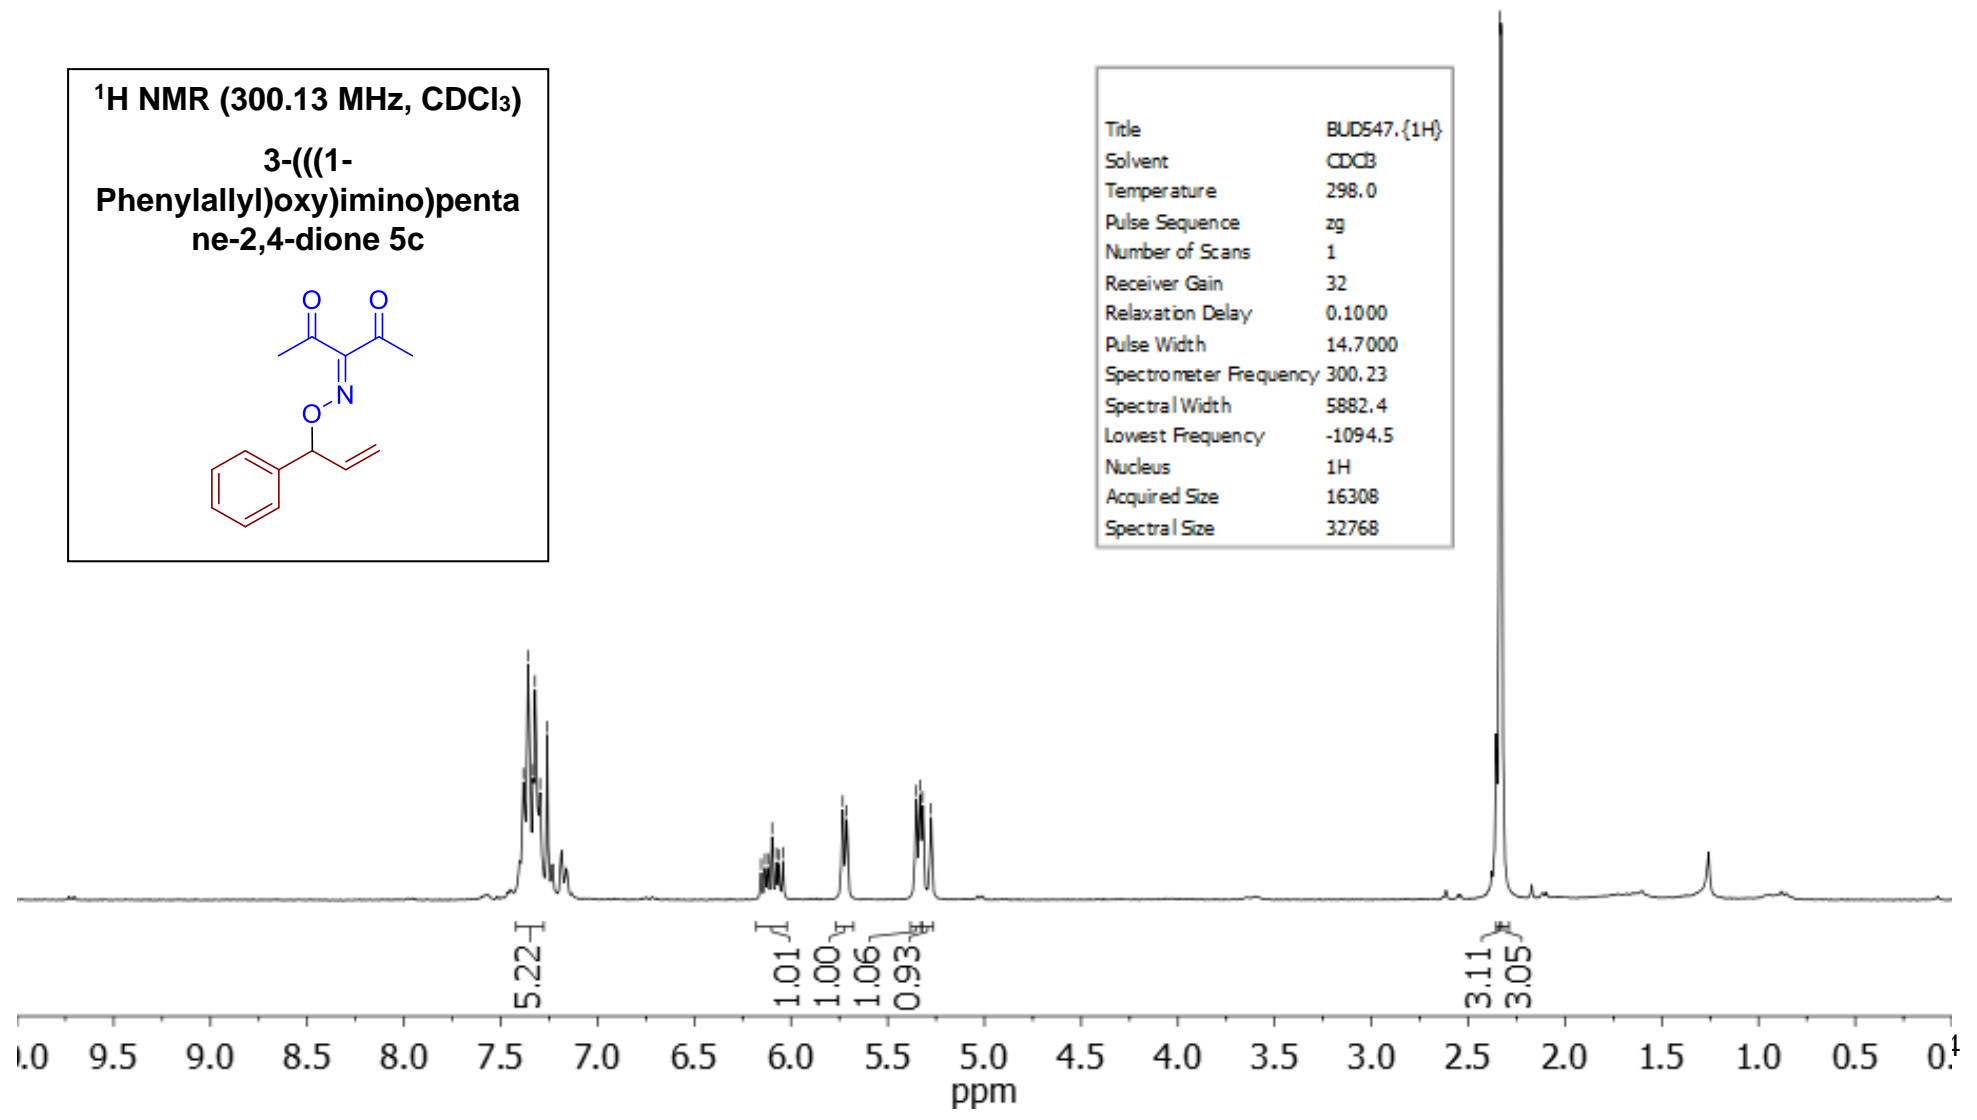

~198.49  
~194.54

~156.28

~138.55  
~136.05  
~128.76  
~128.60  
~127.36  
~118.67

~88.94  
~77.58  
~77.16  
~76.74

~30.68  
~25.77

<sup>13</sup>C NMR (75.47 MHz, CDCl<sub>3</sub>)

3-(((1-Phenylallyl)oxy)imino)pentane-2,4-dione 5c

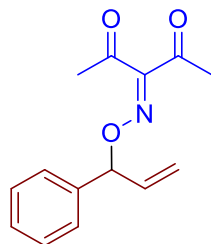

|                        |                   |
|------------------------|-------------------|
| Title                  | BUD547.{13C}      |
| Solvent                | CDCl <sub>3</sub> |
| Temperature            | 298.0             |
| Pulse Sequence         | zgpg30            |
| Number of Scans        | 580               |
| Receiver Gain          | 101               |
| Relaxation Delay       | 0.8000            |
| Pulse Width            | 9.9000            |
| Spectrometer Frequency | 75.50             |
| Spectral Width         | 17857.1           |
| Lowest Frequency       | -1369.2           |
| Nucleus                | 13C               |
| Acquired Size          | 20412             |
| Spectral Size          | 65536             |

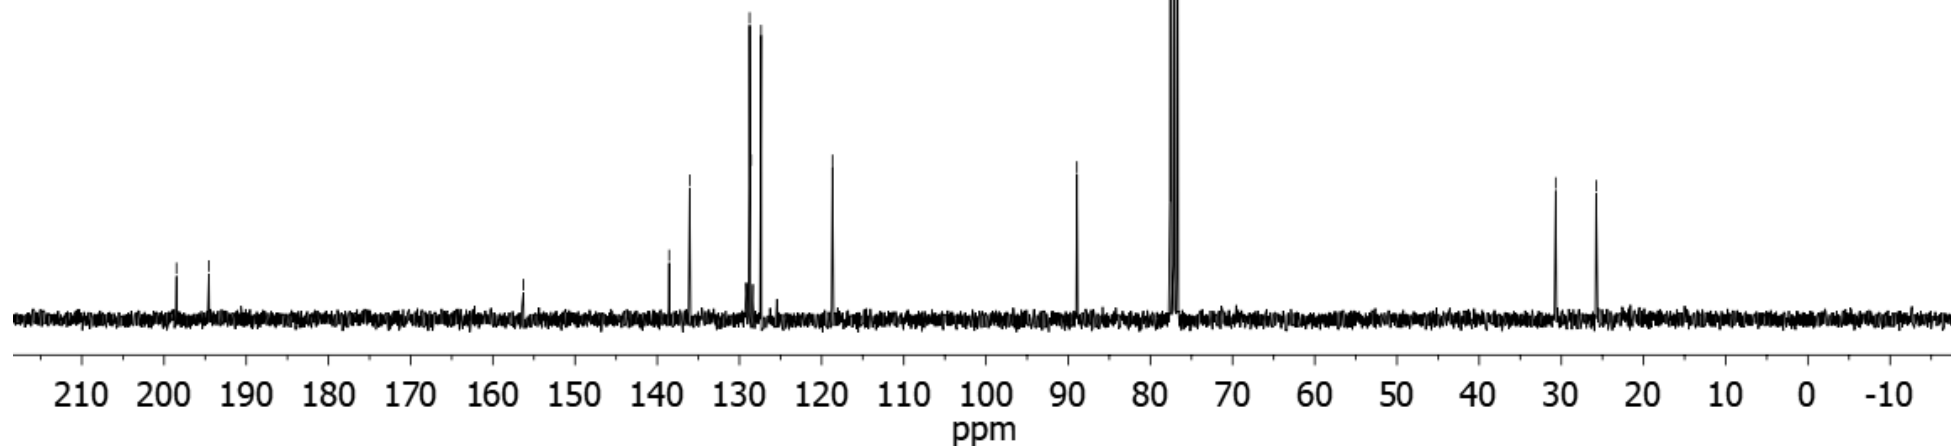

7.42  
7.40  
7.37  
7.34  
7.32  
7.30  
7.28  
7.26  
6.70  
6.64  
6.38  
6.36  
6.34  
6.33  
6.30  
6.28  
4.91  
4.89

2.40  
2.34

<sup>1</sup>H NMR (300.13 MHz, CDCl<sub>3</sub>)

3-((Cinnamyloxy)imino)pentane-  
2,4-dione 5c'

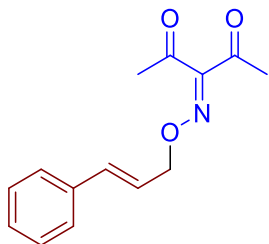

|                        |                   |
|------------------------|-------------------|
| Title                  | BUD548.{1H}       |
| Solvent                | CDCl <sub>3</sub> |
| Temperature            | 298.0             |
| Pulse Sequence         | zg                |
| Number of Scans        | 1                 |
| Receiver Gain          | 32                |
| Relaxation Delay       | 0.1000            |
| Pulse Width            | 14.7000           |
| Spectrometer Frequency | 300.23            |
| Spectral Width         | 5882.4            |
| Lowest Frequency       | -1094.5           |
| Nucleus                | 1H                |
| Acquired Size          | 16308             |
| Spectral Size          | 32768             |

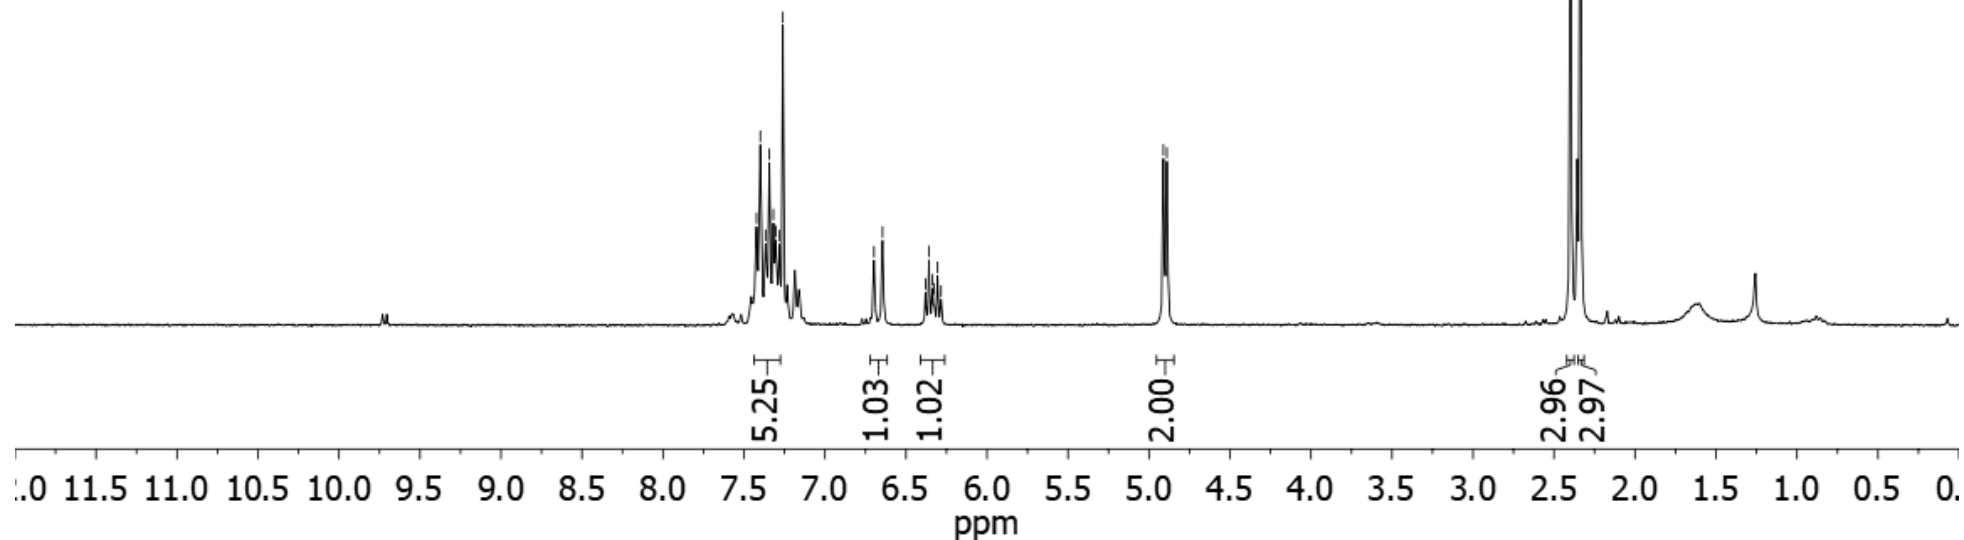

198.63  
194.53

156.21

136.14  
135.32  
128.82  
128.47  
126.85  
123.23

77.58  
77.51  
77.16  
76.74

30.80  
25.77

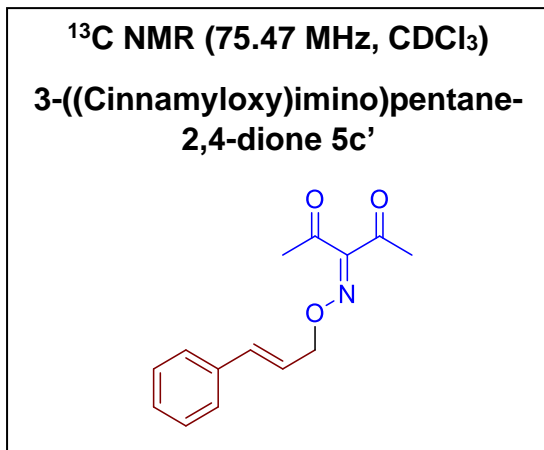

|                        |              |
|------------------------|--------------|
| Title                  | BUD548.{13C} |
| Solvent                | CDCl3        |
| Temperature            | 298.0        |
| Pulse Sequence         | zgpg30       |
| Number of Scans        | 1024         |
| Receiver Gain          | 101          |
| Relaxation Delay       | 0.8000       |
| Pulse Width            | 9.9000       |
| Spectrometer Frequency | 75.50        |
| Spectral Width         | 17857.1      |
| Lowest Frequency       | -1368.7      |
| Nucleus                | 13C          |
| Acquired Size          | 20412        |
| Spectral Size          | 65536        |

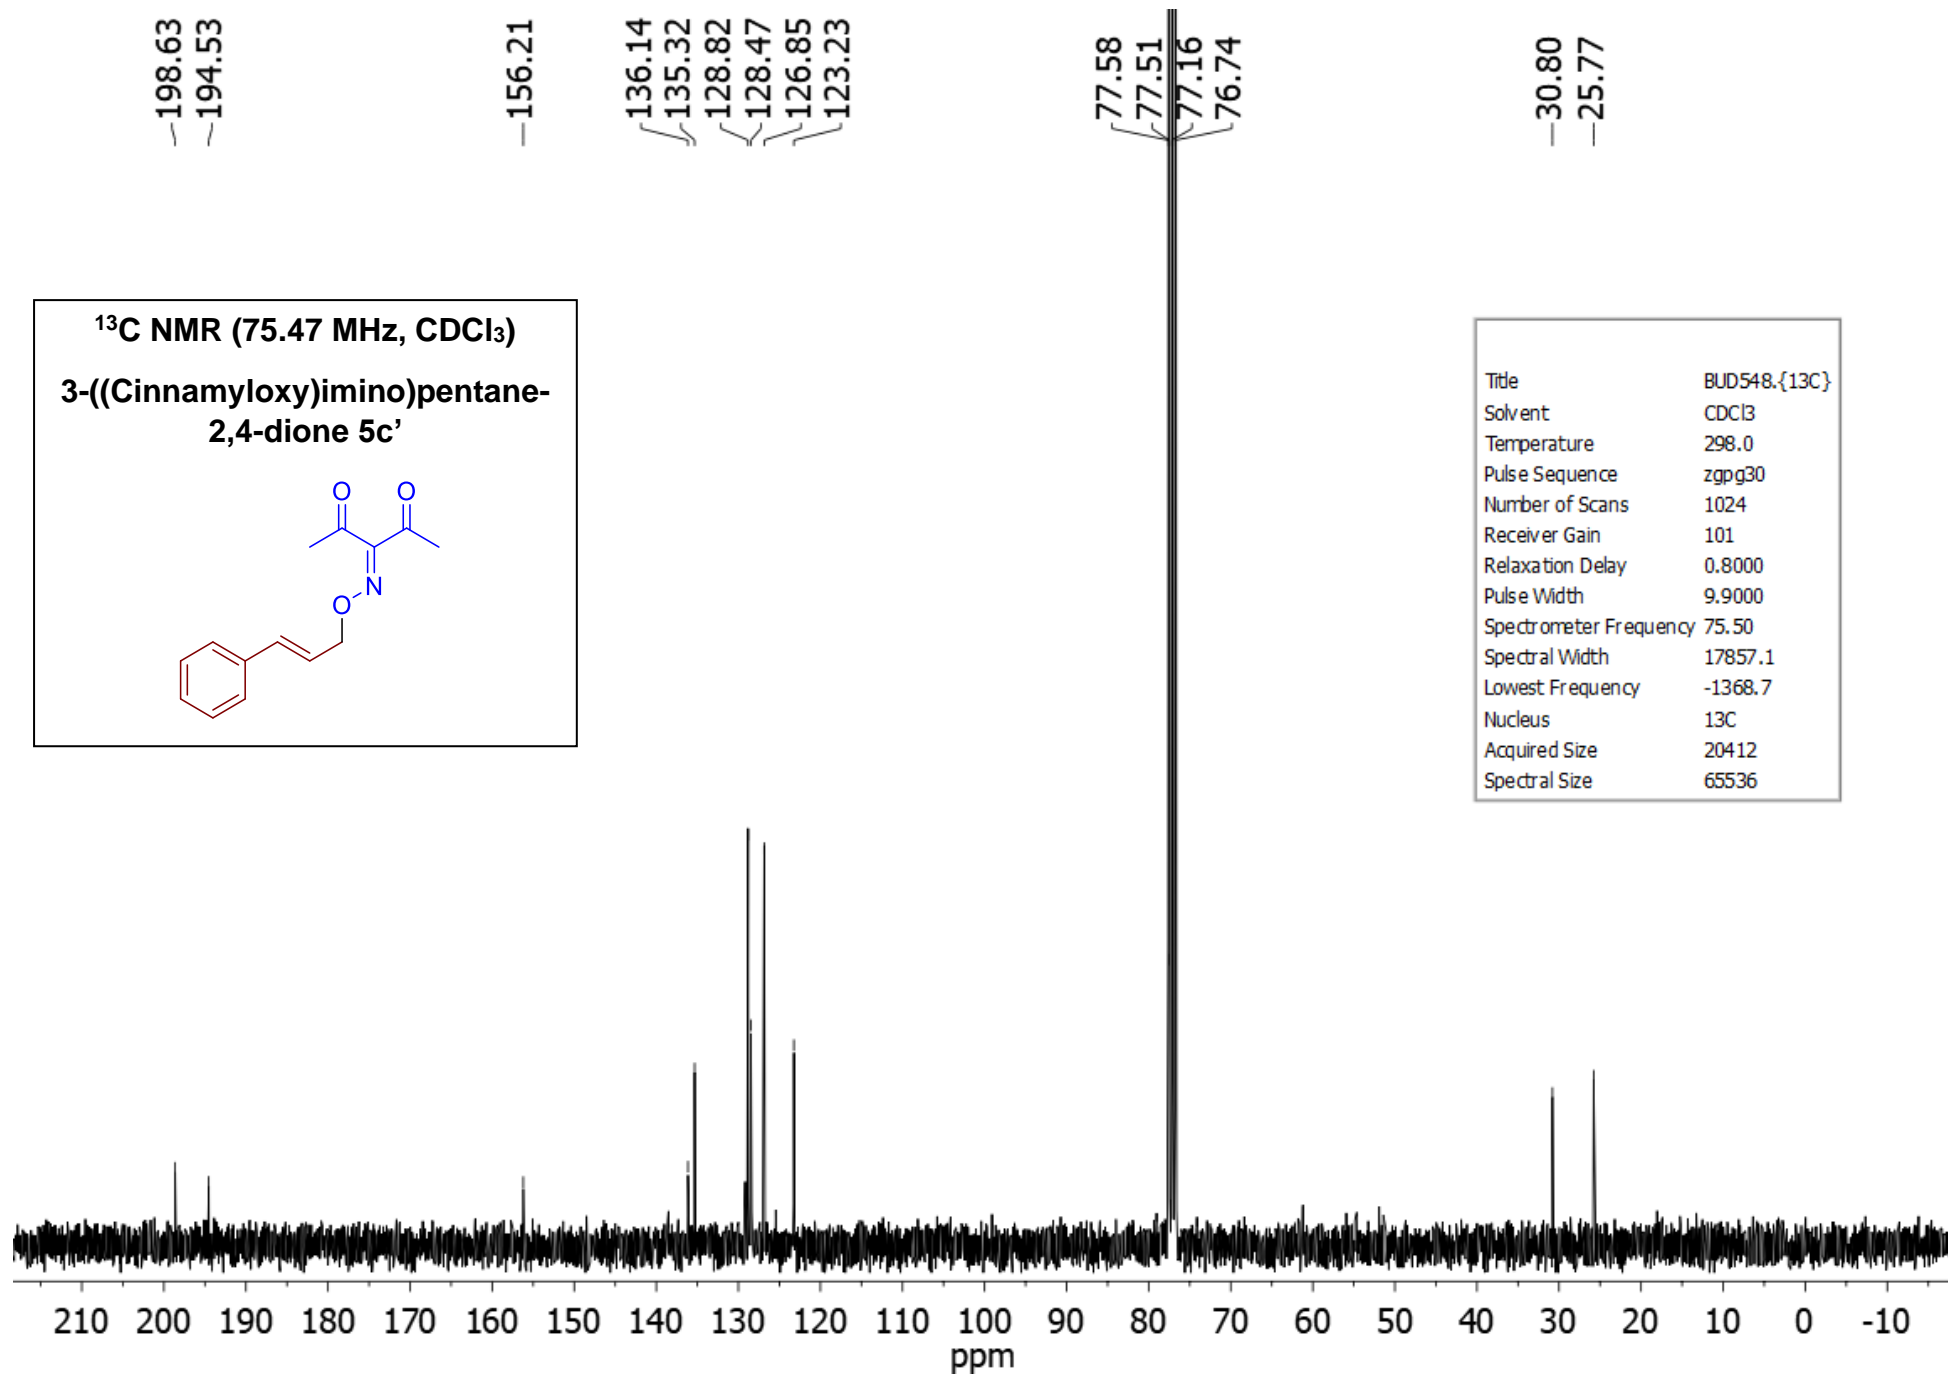

**<sup>1</sup>H NMR (300.13 MHz, CDCl<sub>3</sub>)**

**3,3'-((Cyclooctane-1,2-diylbis(oxy))bis(azanylylide ne))bis(pentane-2,4-dione)**  
**5d**

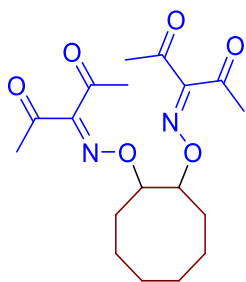

|    |                        |                 |
|----|------------------------|-----------------|
| 1  | Title                  | 8884.{1H}.1.fid |
| 2  | Solvent                | CDCl3           |
| 3  | Temperature            | 300.0           |
| 4  | Pulse Sequence         | zg              |
| 5  | Number of Scans        | 1               |
| 6  | Receiver Gain          | 32.1            |
| 7  | Relaxation Delay       | 0.1000          |
| 8  | Pulse Width            | 14.1000         |
| 9  | Acquisition Time       | 2.7150          |
| 10 | Spectrometer Frequency | 300.13          |
| 11 | Spectral Width         | 6009.6          |
| 12 | Lowest Frequency       | -911.1          |
| 13 | Nucleus                | 1H              |
| 14 | Acquired Size          | 16316           |
| 15 | Spectral Size          | 65536           |

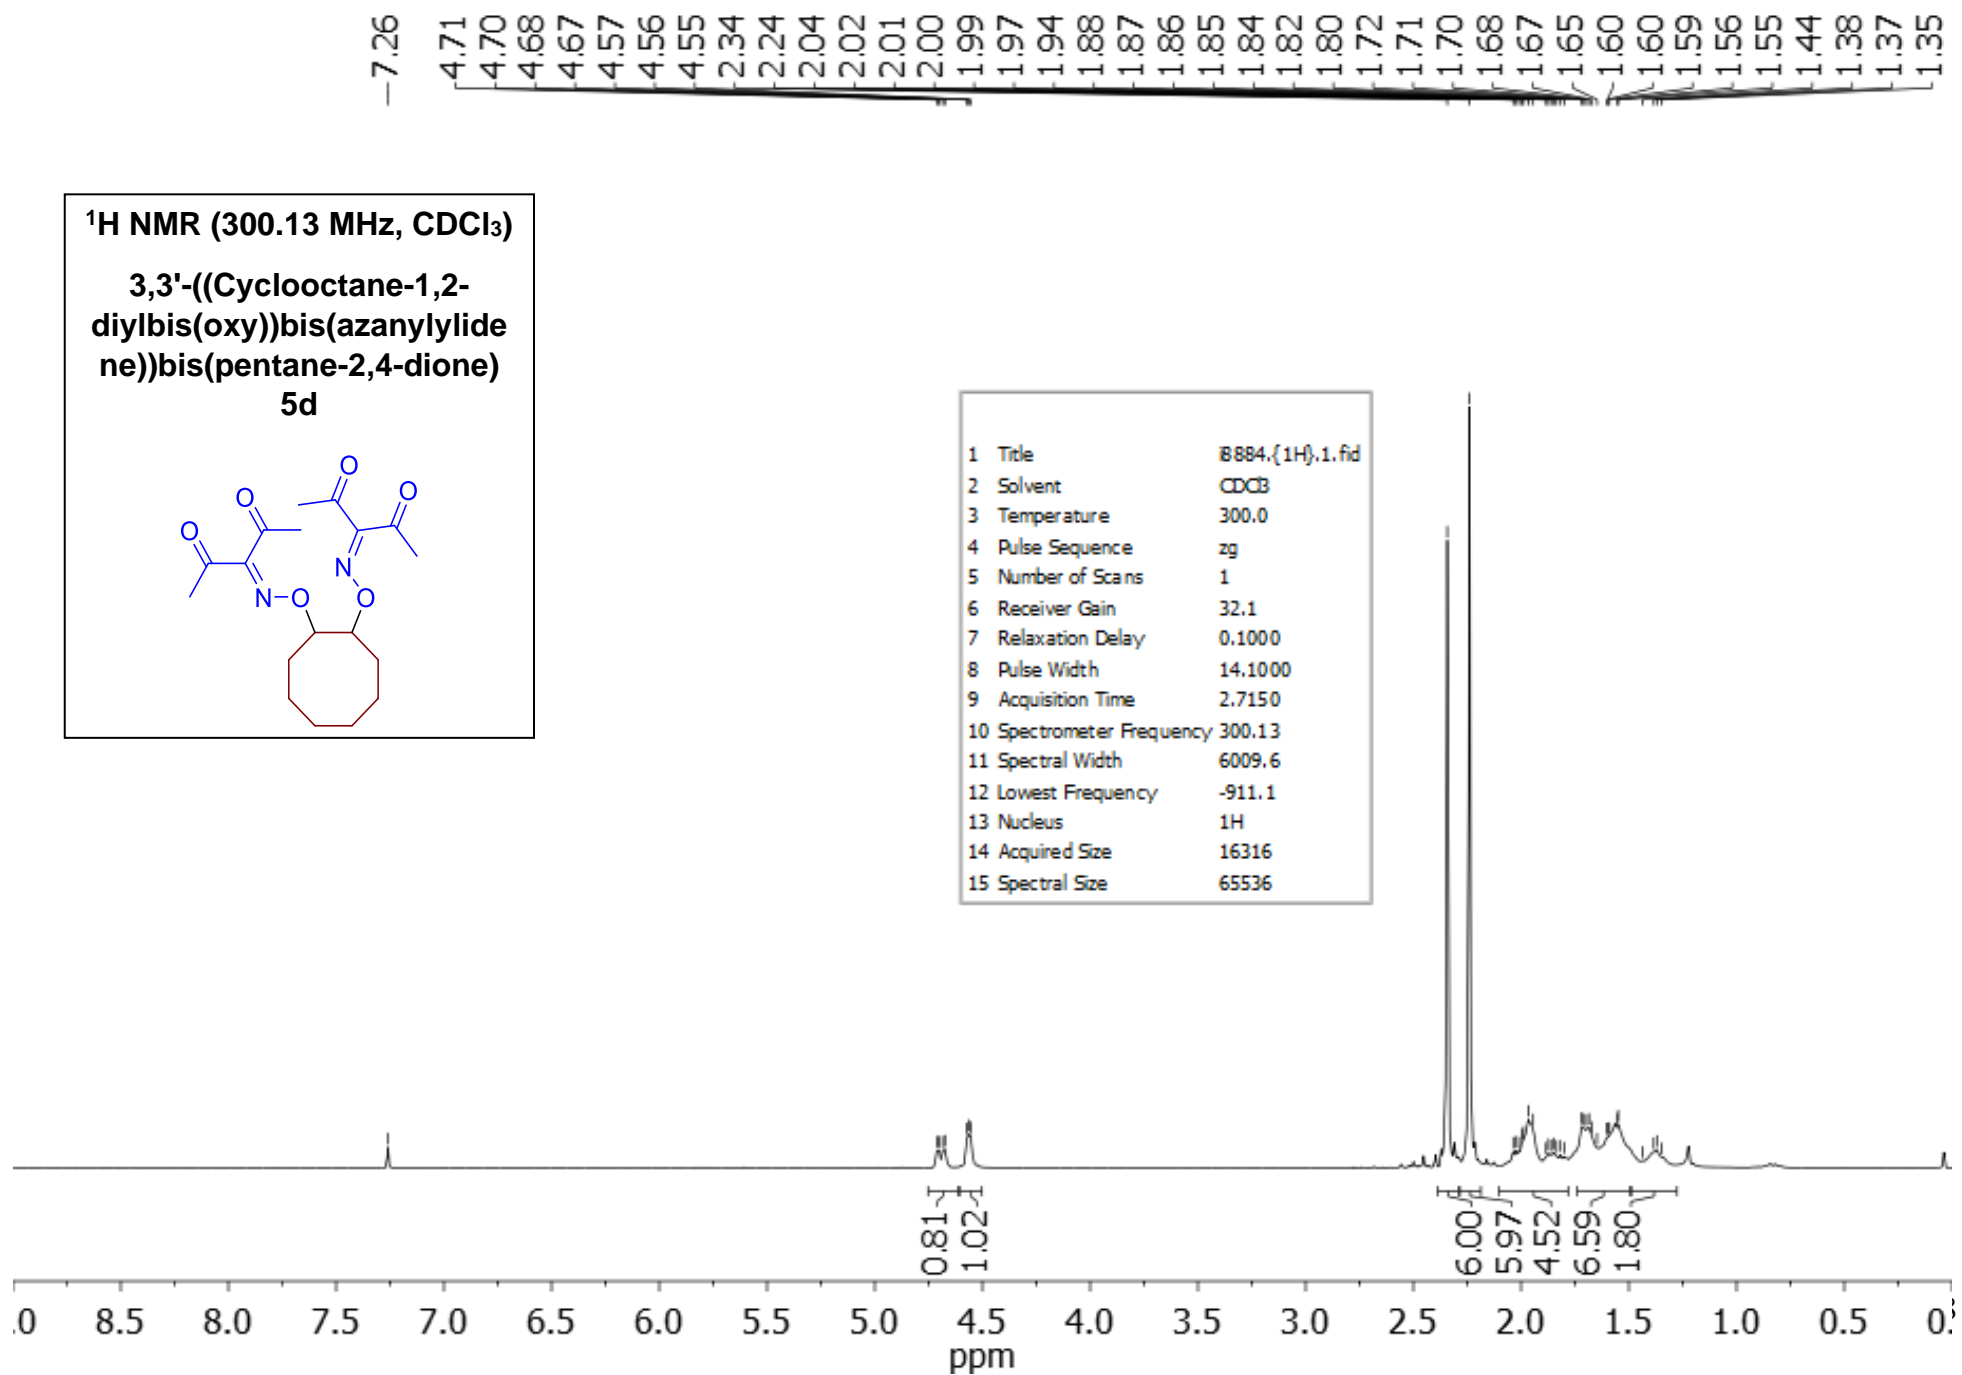



198.41  
198.31  
194.26

156.04  
156.01

88.29  
86.47  
77.58  
77.16  
76.74

30.49  
30.42  
28.84  
28.25  
26.16  
25.61  
25.58  
25.53  
24.48  
22.64

**$^{13}\text{C}$  NMR (75.47 MHz,  $\text{CDCl}_3$ )**

**3,3'-((Cyclooctane-1,2-  
diylbis(oxy))bis(azanylyl-  
ide))bis(pentane-2,4-dione)**

**5d**

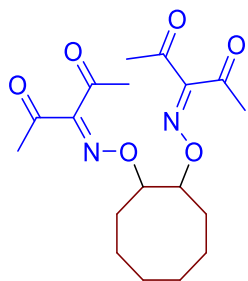

|    |                        |                   |
|----|------------------------|-------------------|
| 1  | Title                  | i8884.{13C}.1.fid |
| 2  | Solvent                | $\text{CDCl}_3$   |
| 3  | Temperature            | 298.0             |
| 4  | Pulse Sequence         | zgpg30            |
| 5  | Number of Scans        | 128               |
| 6  | Receiver Gain          | 101.0             |
| 7  | Relaxation Delay       | 0.8000            |
| 8  | Pulse Width            | 9.9000            |
| 9  | Acquisition Time       | 1.1431            |
| 10 | Spectrometer Frequency | 75.50             |
| 11 | Spectral Width         | 17857.1           |
| 12 | Lowest Frequency       | -1374.6           |
| 13 | Nucleus                | $^{13}\text{C}$   |
| 14 | Acquired Size          | 20412             |
| 15 | Spectral Size          | 65536             |

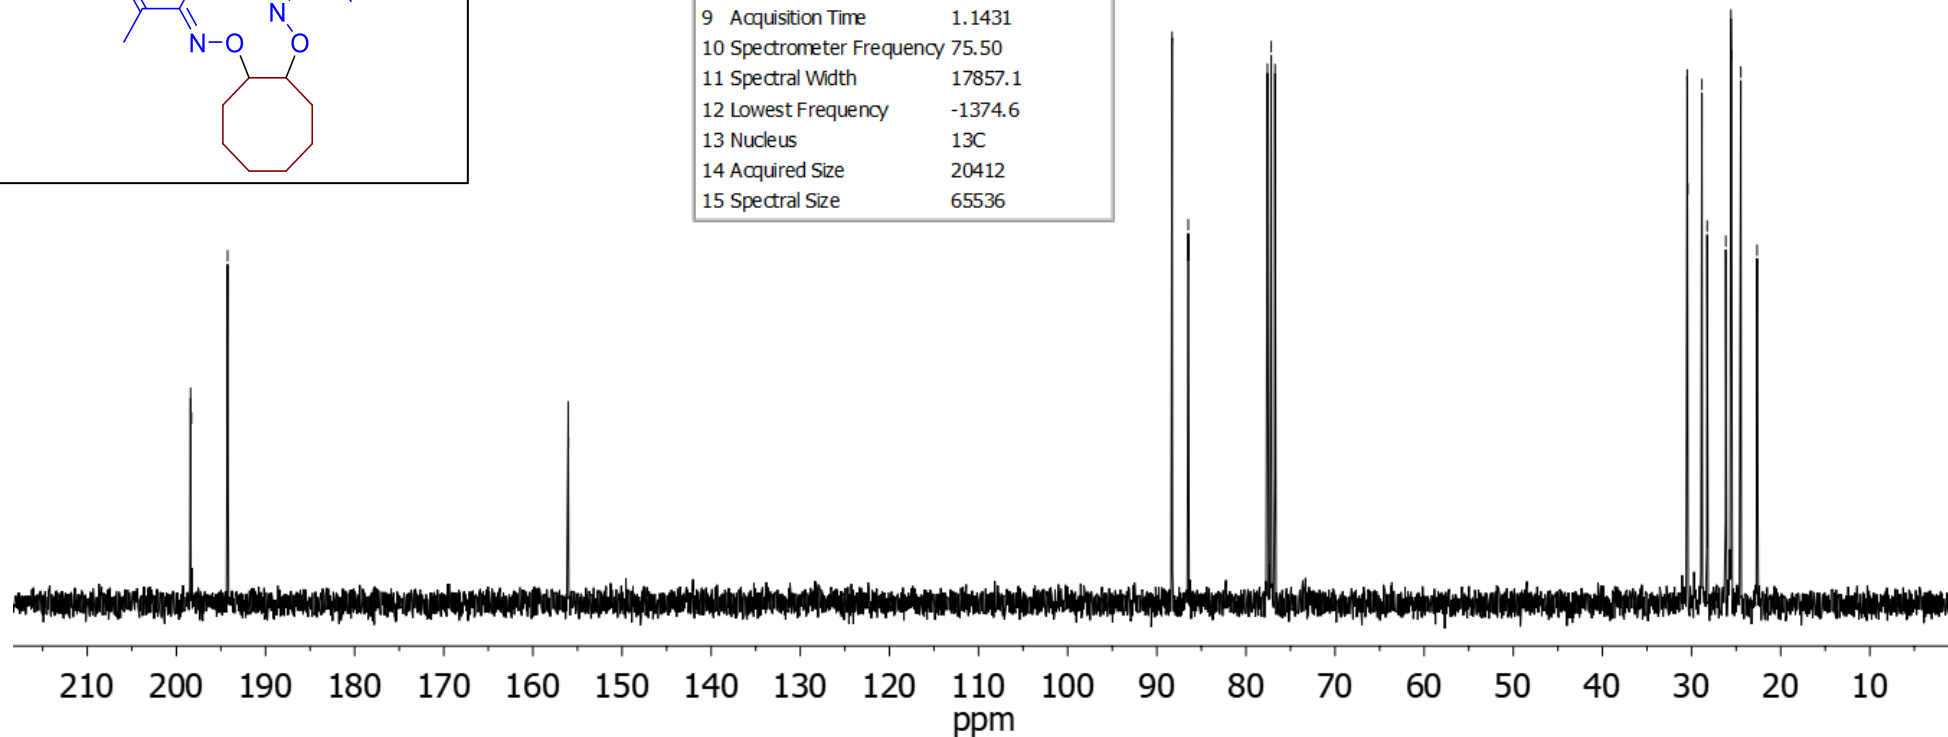

-7.26

4.44  
4.40  
4.38  
4.34

2.39  
2.34  
2.30  
2.26  
1.84  
1.79  
1.63  
1.58  
1.45  
0.99

**<sup>1</sup>H NMR (300.13 MHz, CDCl<sub>3</sub>)**

**3,3'-(((2,4,4-Trimethylpentane-1,2-diyloxy))bis(azanylylidene))bis(pentane-2,4-dione) 5e**

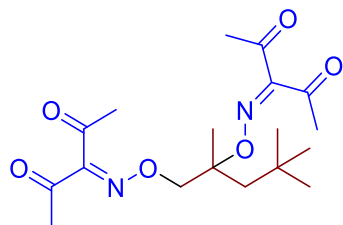

|                        |             |
|------------------------|-------------|
| Title                  | BUD546.{1H} |
| Solvent                | CDCl3       |
| Temperature            | 298.0       |
| Pulse Sequence         | zg          |
| Number of Scans        | 1           |
| Receiver Gain          | 32          |
| Relaxation Delay       | 0.1000      |
| Pulse Width            | 14.7000     |
| Spectrometer Frequency | 300.23      |
| Spectral Width         | 5882.4      |
| Lowest Frequency       | -1094.5     |
| Nucleus                | 1H          |
| Acquired Size          | 16308       |
| Spectral Size          | 32768       |

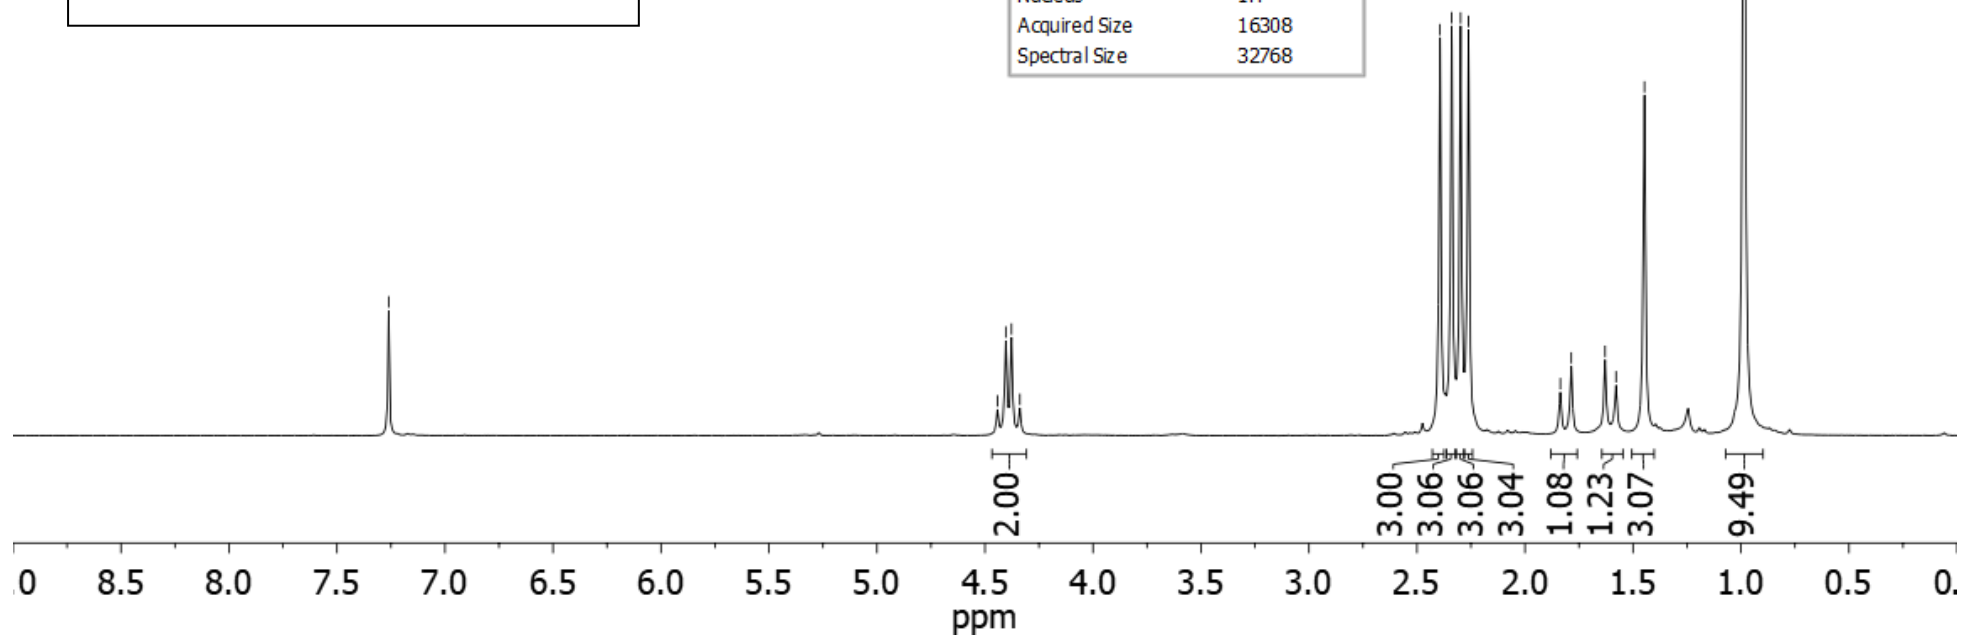

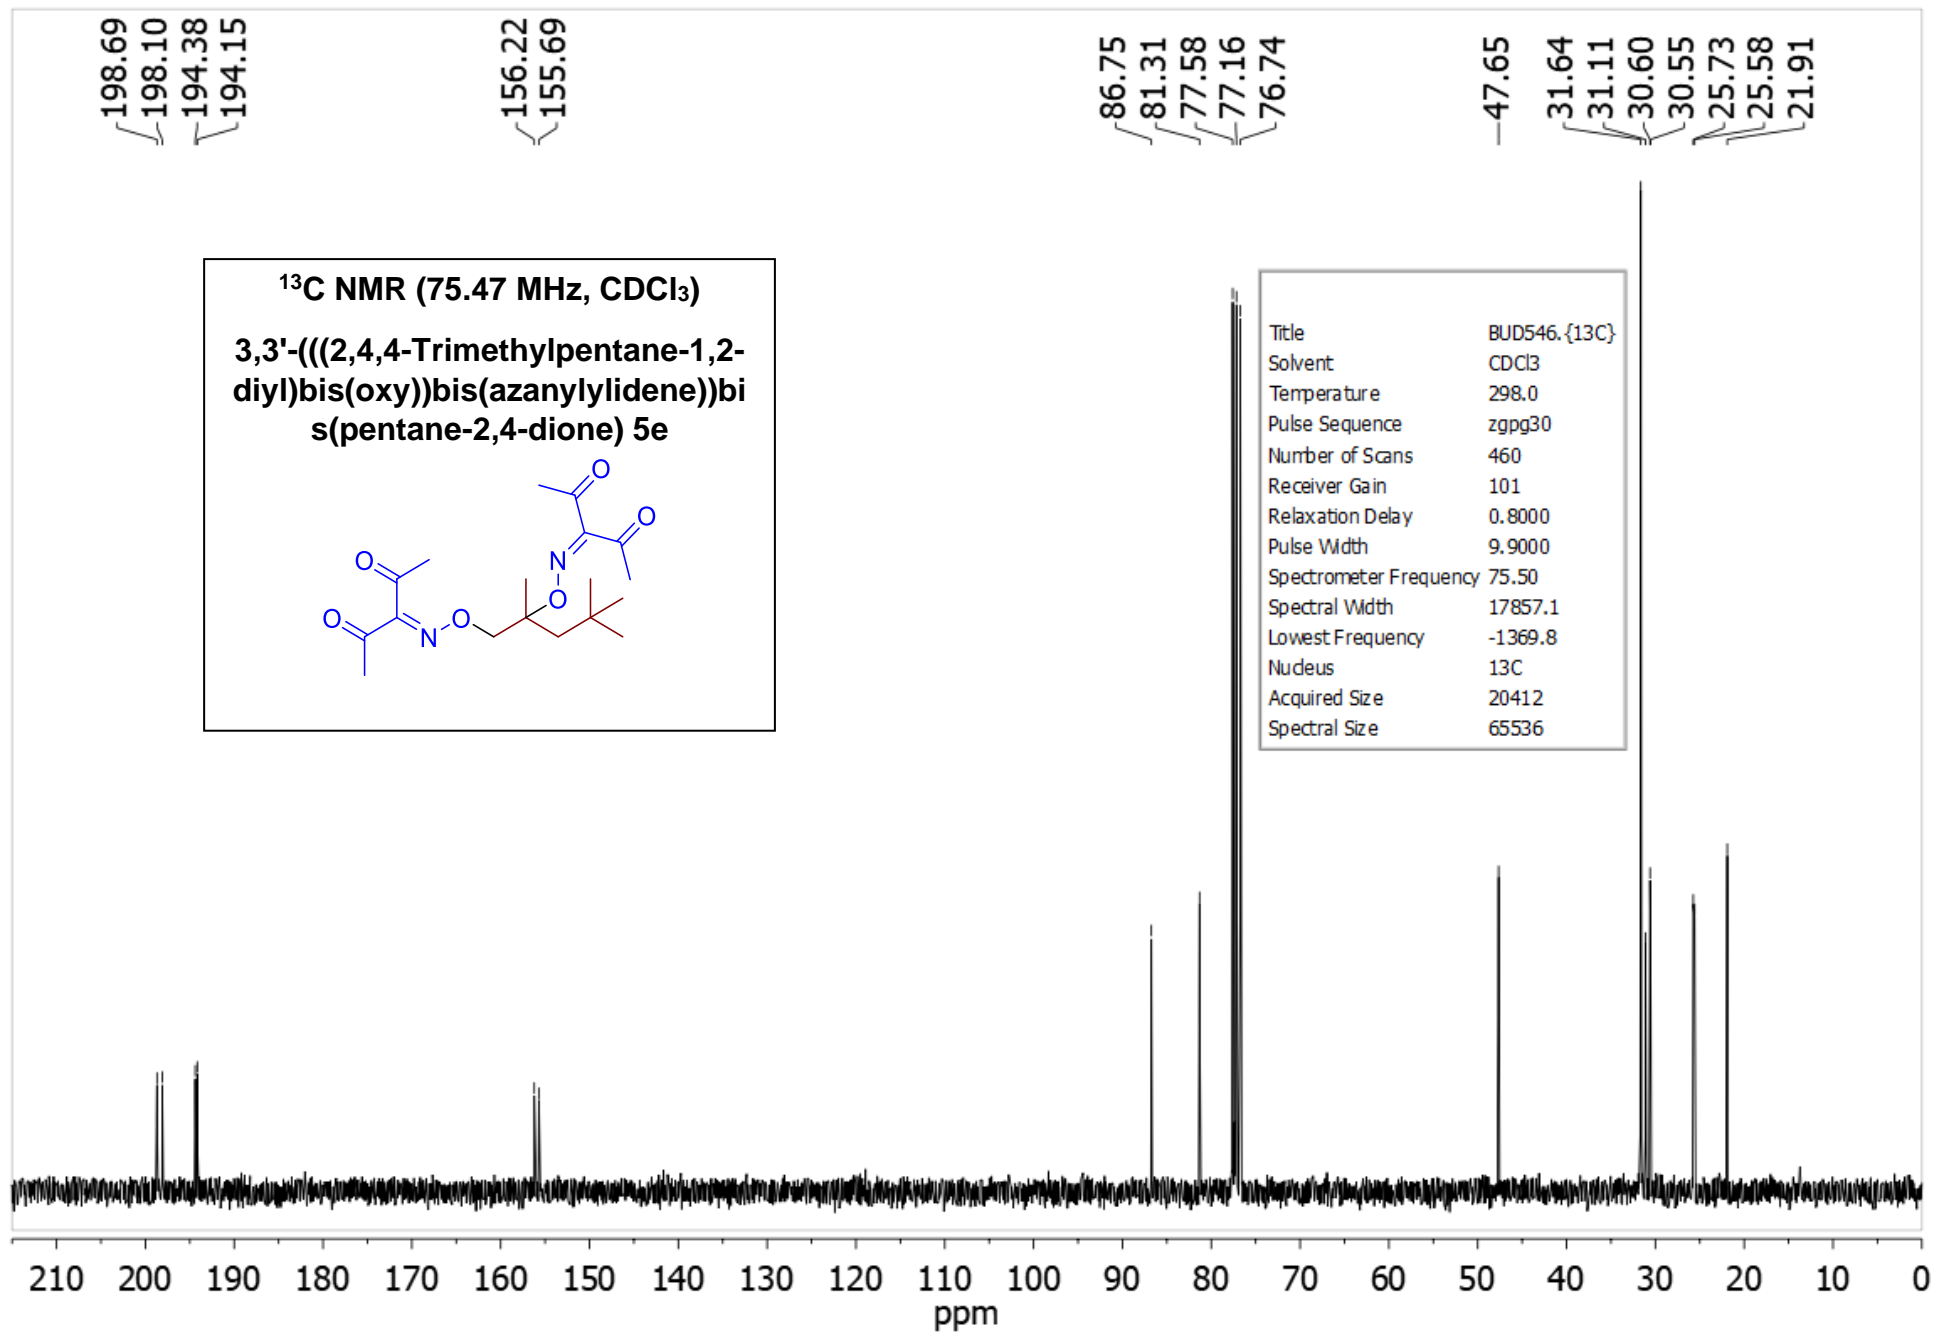

**<sup>1</sup>H NMR (300.13 MHz, CDCl<sub>3</sub>)**  
**3,3'-(((2-Methylpentane-1,2-diyl)bis(oxy))bis(azanylylidene))bi**  
**s(pentane-2,4-dione) 5f**

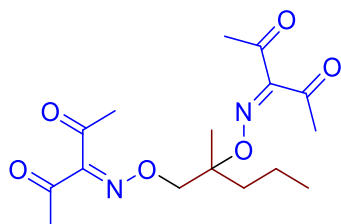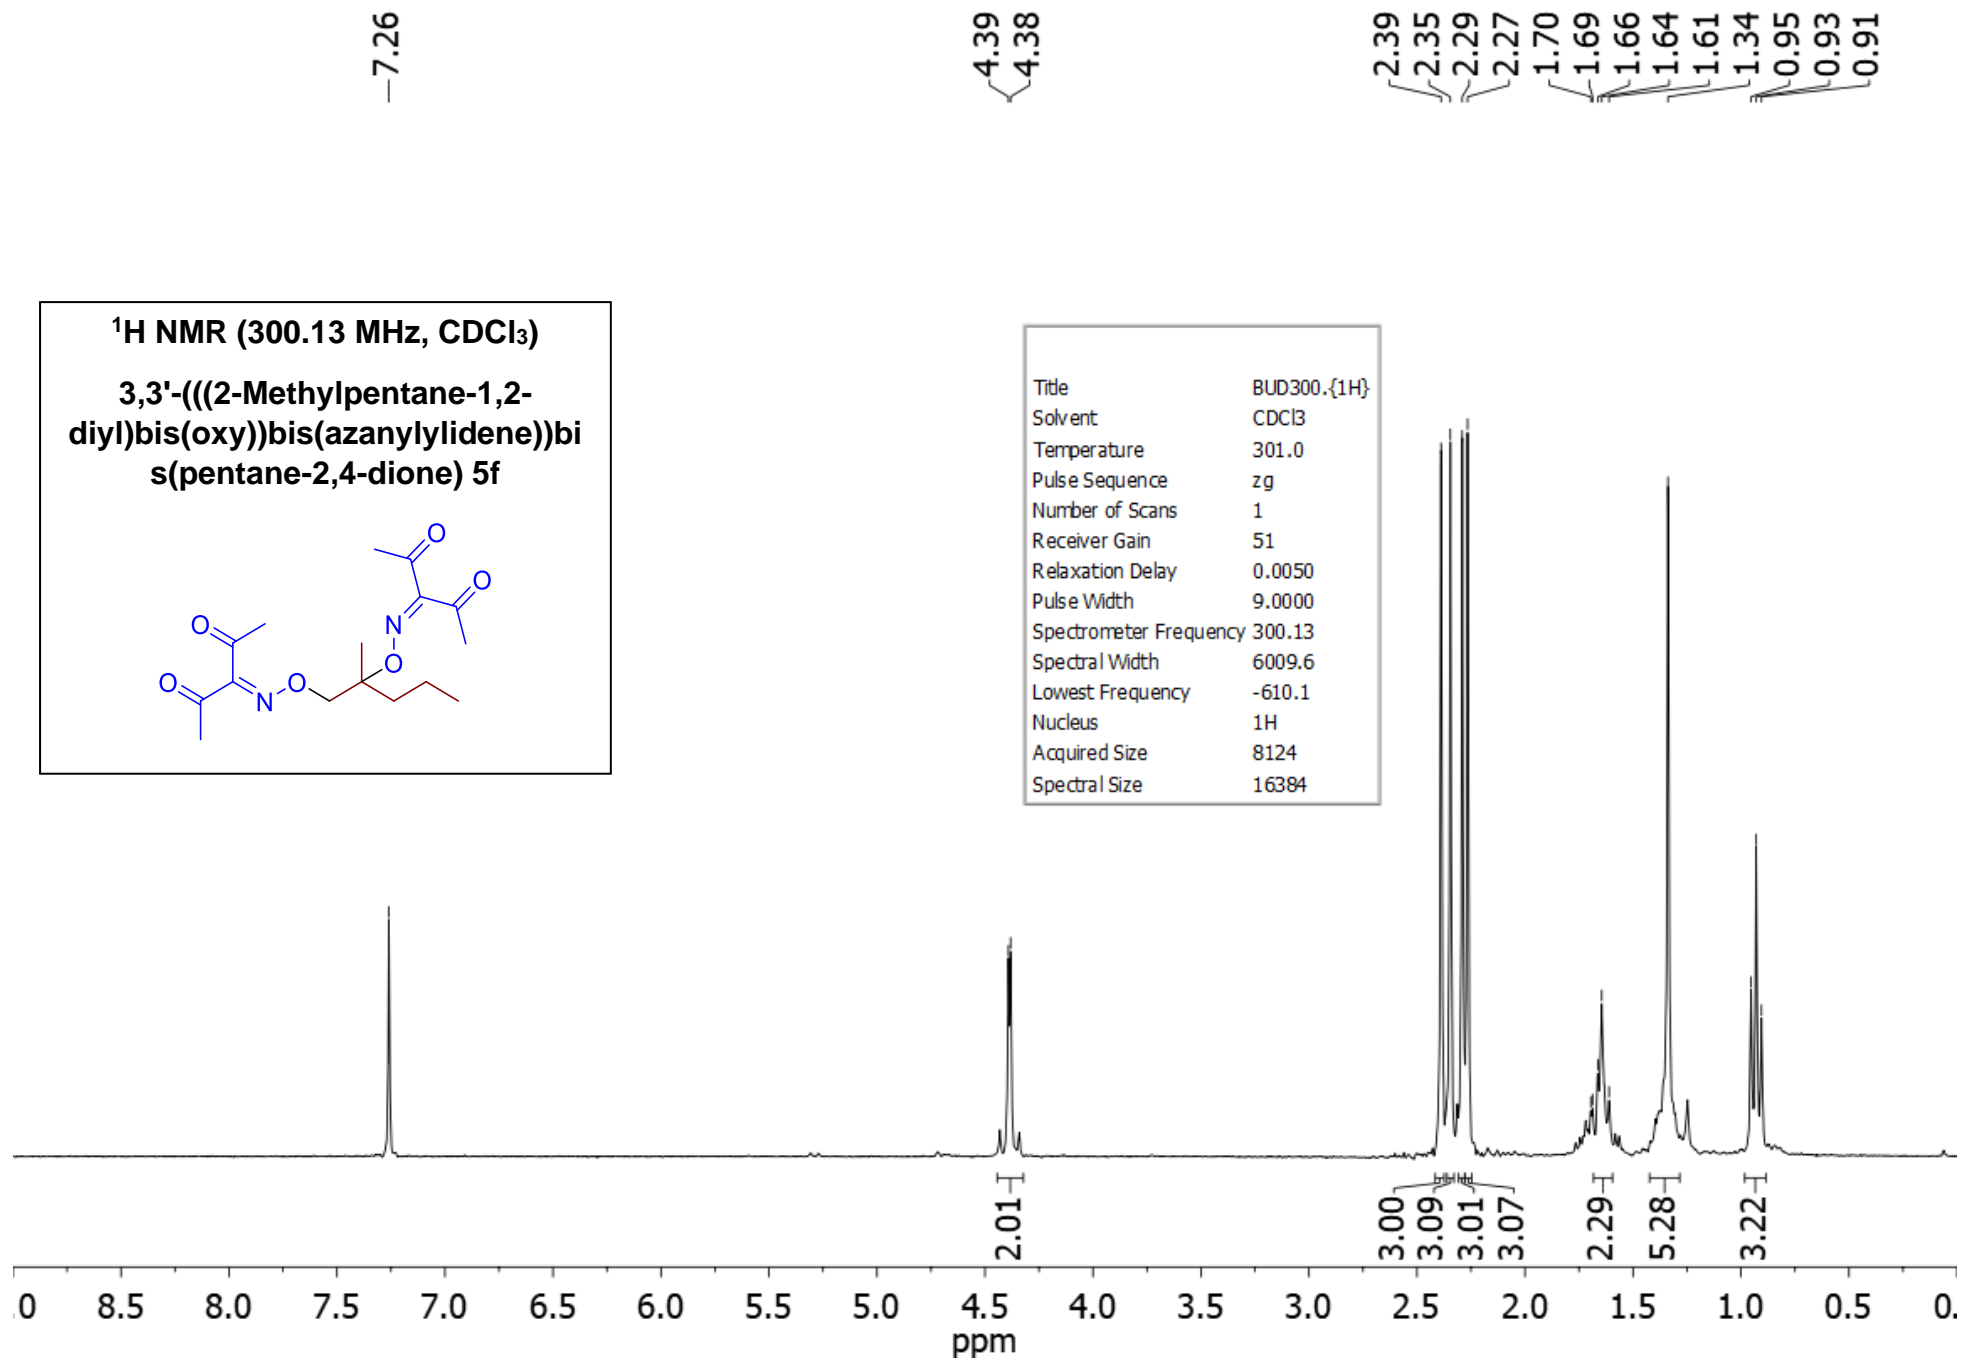

|                        |                   |
|------------------------|-------------------|
| Title                  | BUD300.{1H}       |
| Solvent                | CDCl <sub>3</sub> |
| Temperature            | 301.0             |
| Pulse Sequence         | zg                |
| Number of Scans        | 1                 |
| Receiver Gain          | 51                |
| Relaxation Delay       | 0.0050            |
| Pulse Width            | 9.0000            |
| Spectrometer Frequency | 300.13            |
| Spectral Width         | 6009.6            |
| Lowest Frequency       | -610.1            |
| Nucleus                | <sup>1</sup> H    |
| Acquired Size          | 8124              |
| Spectral Size          | 16384             |

198.54  
198.07  
194.34  
194.18

156.22  
156.01

85.60  
79.99  
77.58  
77.16  
76.74

38.01  
30.59  
30.57  
25.74  
25.60  
20.39  
16.64  
14.64

<sup>13</sup>C NMR (75.47 MHz, CDCl<sub>3</sub>)

3,3'-(((2-Methylpentane-1,2-diyl)bis(oxy))bis(azanylylidene))bis(pentane-2,4-dione) 5f

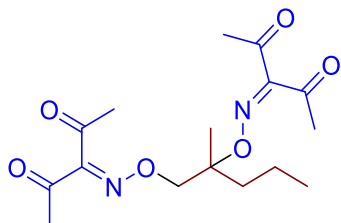

|                        |              |
|------------------------|--------------|
| Title                  | BUD300.{13C} |
| Solvent                | CDCl3        |
| Temperature            | 298.0        |
| Pulse Sequence         | zgpg30       |
| Number of Scans        | 200          |
| Receiver Gain          | 101          |
| Relaxation Delay       | 0.8000       |
| Pulse Width            | 9.9000       |
| Spectrometer Frequency | 75.50        |
| Spectral Width         | 17857.1      |
| Lowest Frequency       | -1369.5      |
| Nucleus                | 13C          |
| Acquired Size          | 20412        |
| Spectral Size          | 65536        |

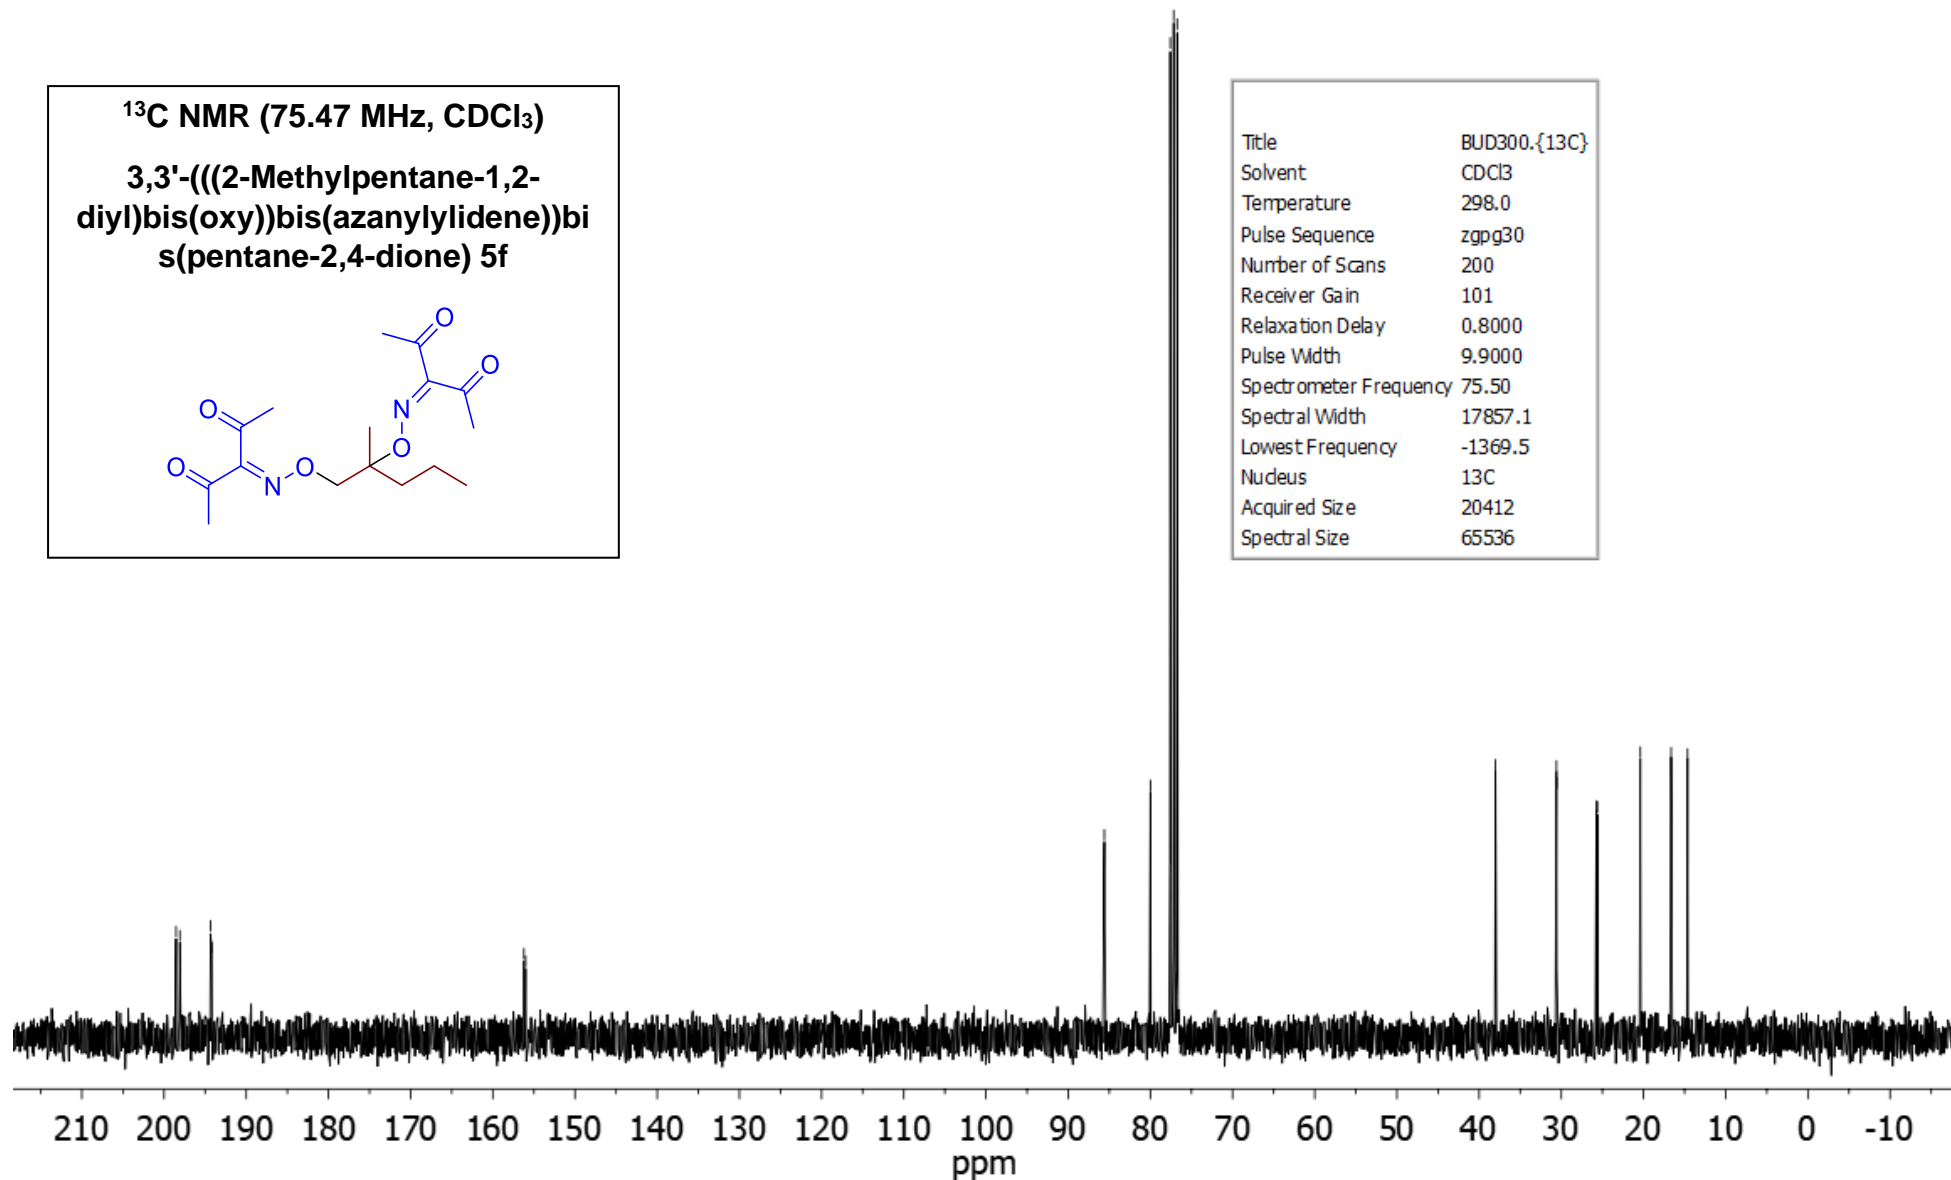

**<sup>1</sup>H NMR (300.13 MHz, CDCl<sub>3</sub>)**  
**5g (mixture of 1,2- and 1,4-**  
**regioisomers, 1.75:1)**

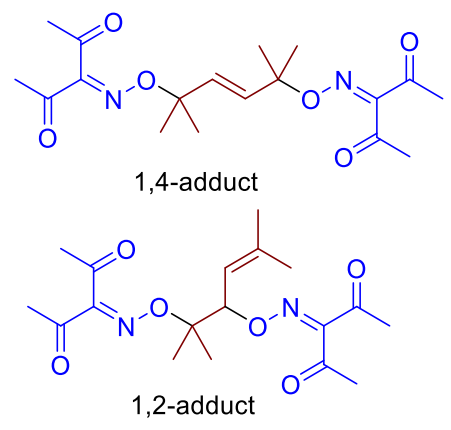

|                        |             |
|------------------------|-------------|
| Title                  | BUD242_{1H} |
| Solvent                | CDCl3       |
| Temperature            | 301.1       |
| Pulse Sequence         | zg          |
| Number of Scans        | 1           |
| Receiver Gain          | 20          |
| Relaxation Delay       | 1.0000      |
| Pulse Width            | 9.0000      |
| Spectrometer Frequency | 300.13      |
| Spectral Width         | 6009.6      |
| Lowest Frequency       | -609.8      |
| Nucleus                | 1H          |
| Acquired Size          | 8124        |
| Spectral Size          | 16384       |

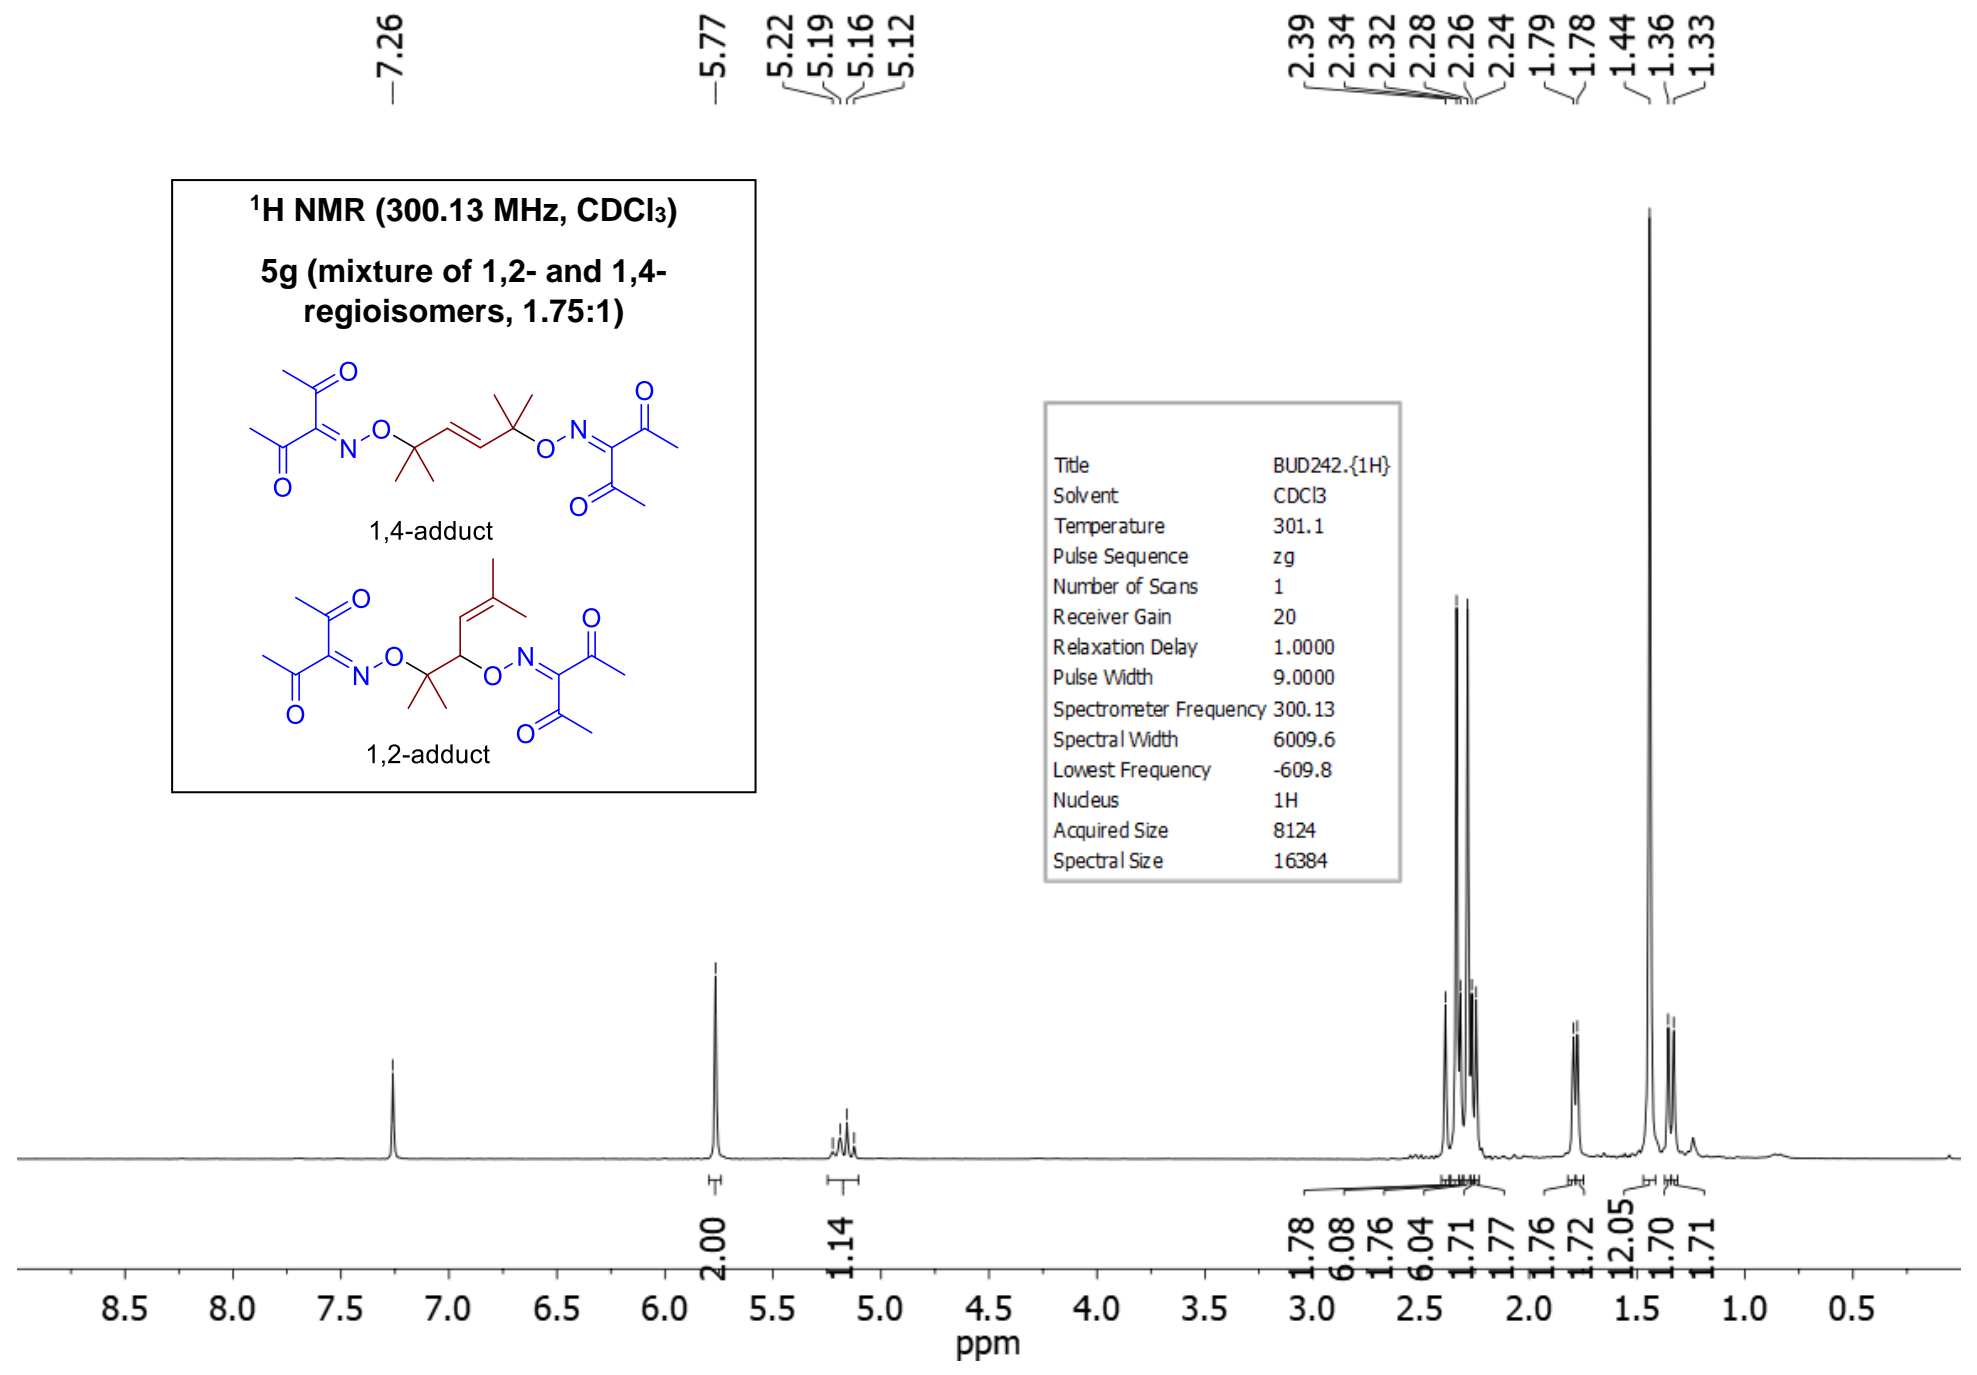

198.74  
198.52  
198.29  
194.44  
194.29  
194.22

155.82  
155.78

-141.12  
-134.04

-119.12

87.00  
86.03  
83.80  
77.58  
77.16  
76.74

30.62  
30.50  
30.49  
26.28  
25.98  
25.67  
25.57  
25.47  
22.77  
21.70  
18.90

**<sup>13</sup>C NMR (75.47 MHz, CDCl<sub>3</sub>)**

**5g (mixture of 1,2- and 1,4-  
regioisomers, 1.75:1)**

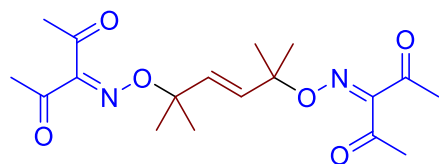

1,4-adduct

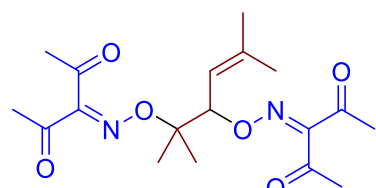

1,2-adduct

|                        |                         |
|------------------------|-------------------------|
| Title                  | BUD242- <sup>13</sup> C |
| Solvent                | CDCl <sub>3</sub>       |
| Temperature            | 301.2                   |
| Pulse Sequence         | zgpg30                  |
| Number of Scans        | 410                     |
| Receiver Gain          | 3250                    |
| Relaxation Delay       | 1.0000                  |
| Pulse Width            | 13.0000                 |
| Spectrometer Frequency | 75.48                   |
| Spectral Width         | 18115.9                 |
| Lowest Frequency       | -745.1                  |
| Nucleus                | <sup>13</sup> C         |
| Acquired Size          | 16308                   |
| Spectral Size          | 32768                   |

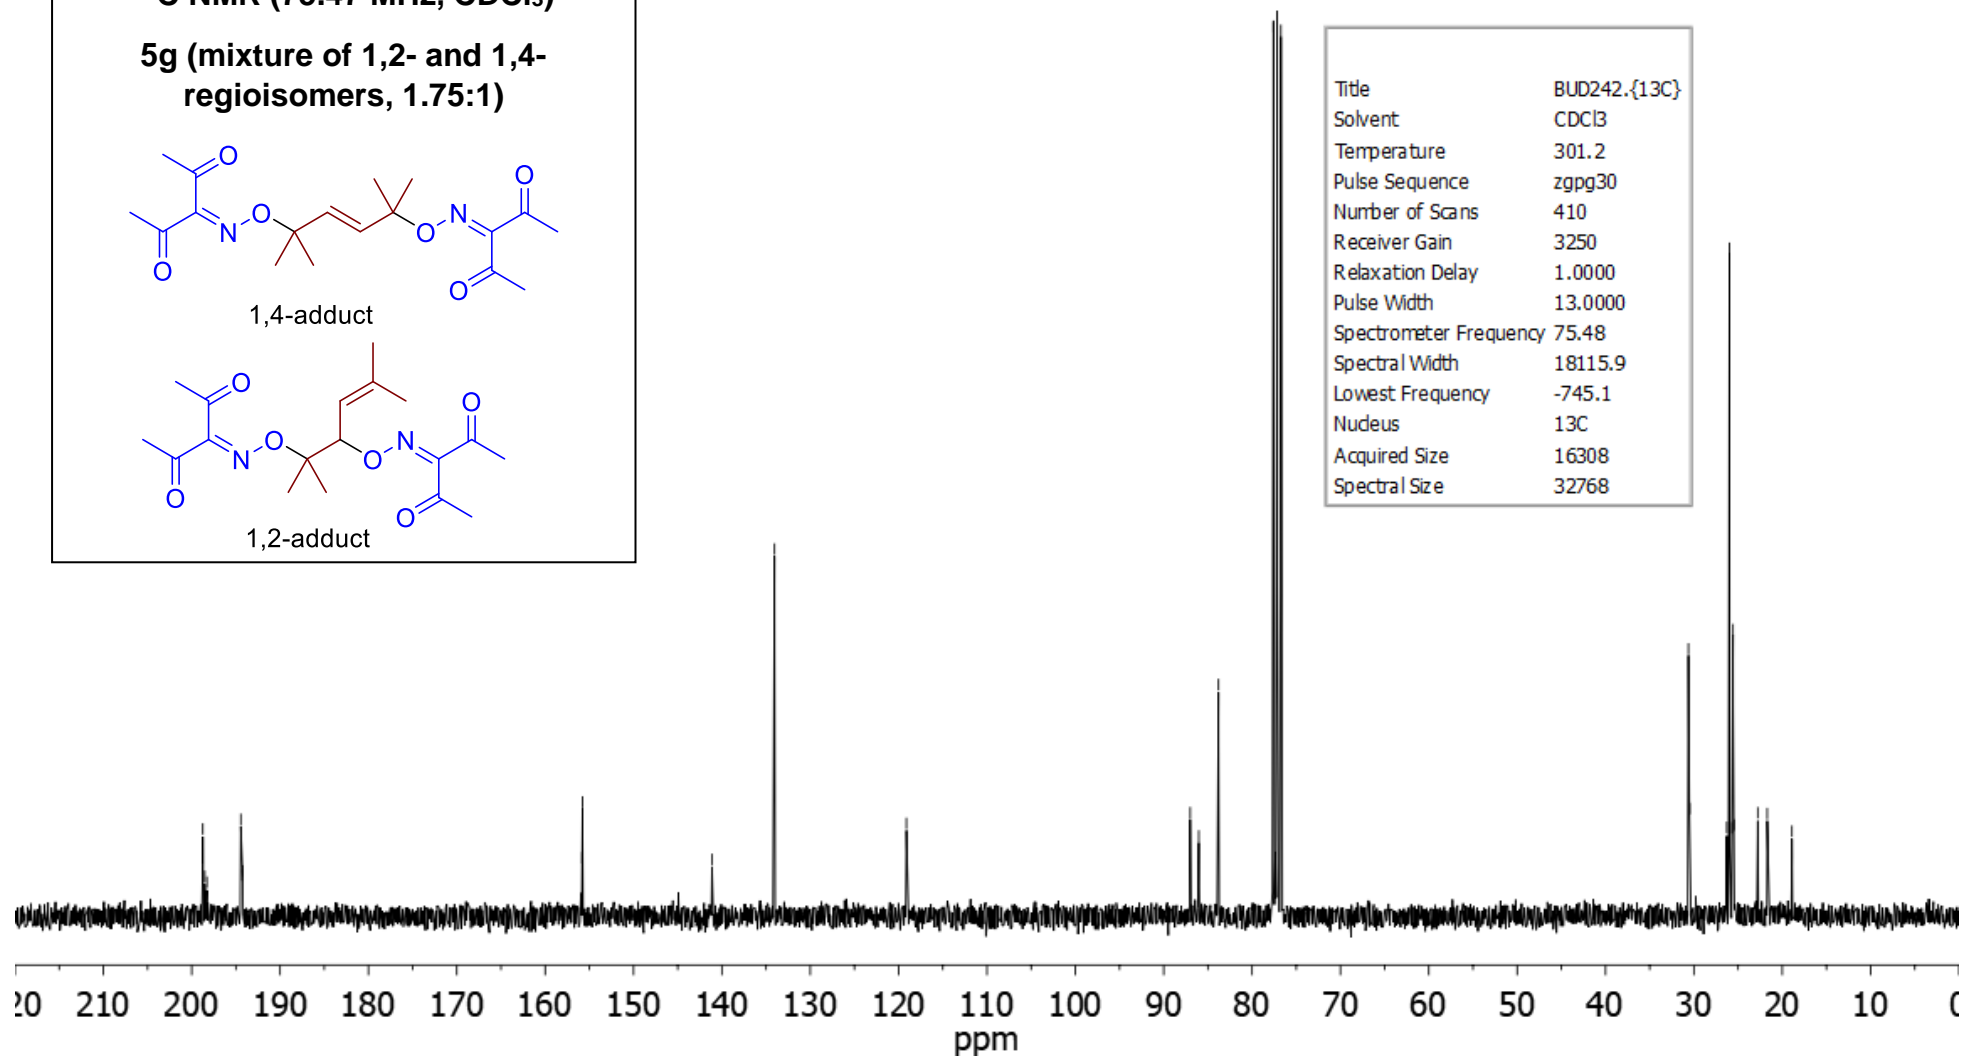

Supplement: d3ob00925d1.pdf [file d3ob00925d1.pdf]
